# Supplementary material for: On the limits of fitting complex models of population history to f-statistics
Source: eLife journal article supplement (doi:10.7554/elife.85492), 2023-04-14

**Figure 4–source data 1.** Published admixture graph from Lipson *et al.* (2020) and alternative graphs found with *findGraphs* (12 populations, 11 admixture events) using the updated algorithm for calculating  $f_3$ -statistics. The graphs were also re-fitted using the original algorithm for calculating  $f_3$ -statistics. Model parameters (graph edges) that were inferred to be unidentifiable are plotted in red.

**a, published model**

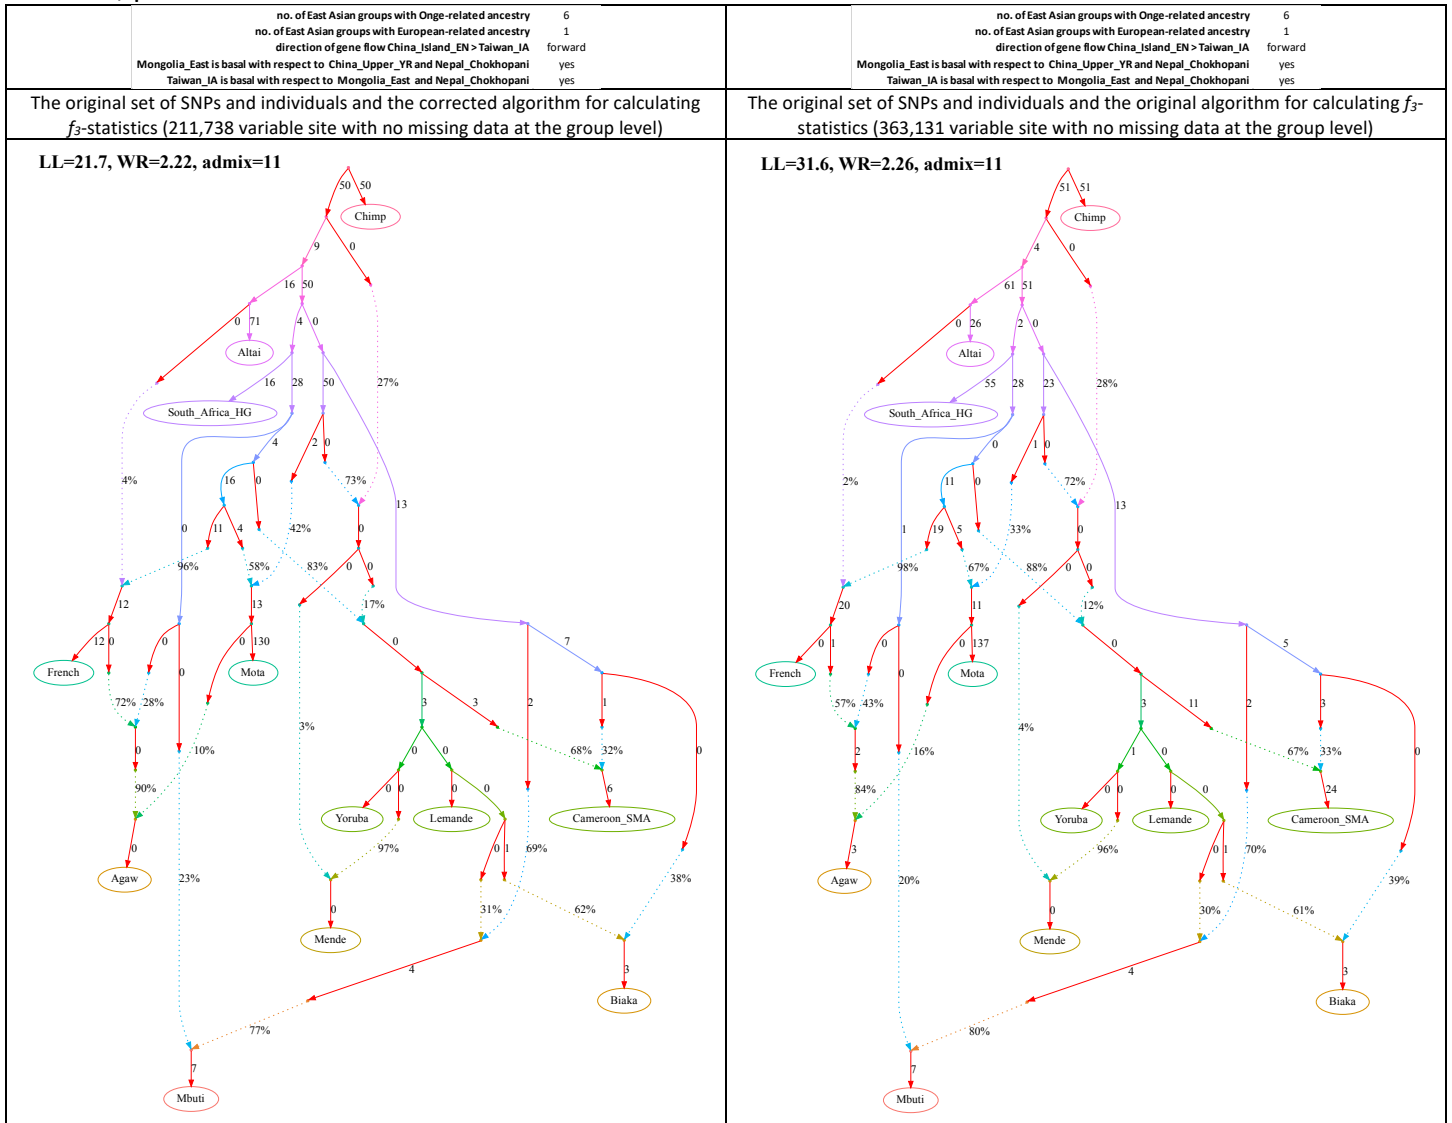

**b, published model, simplified**

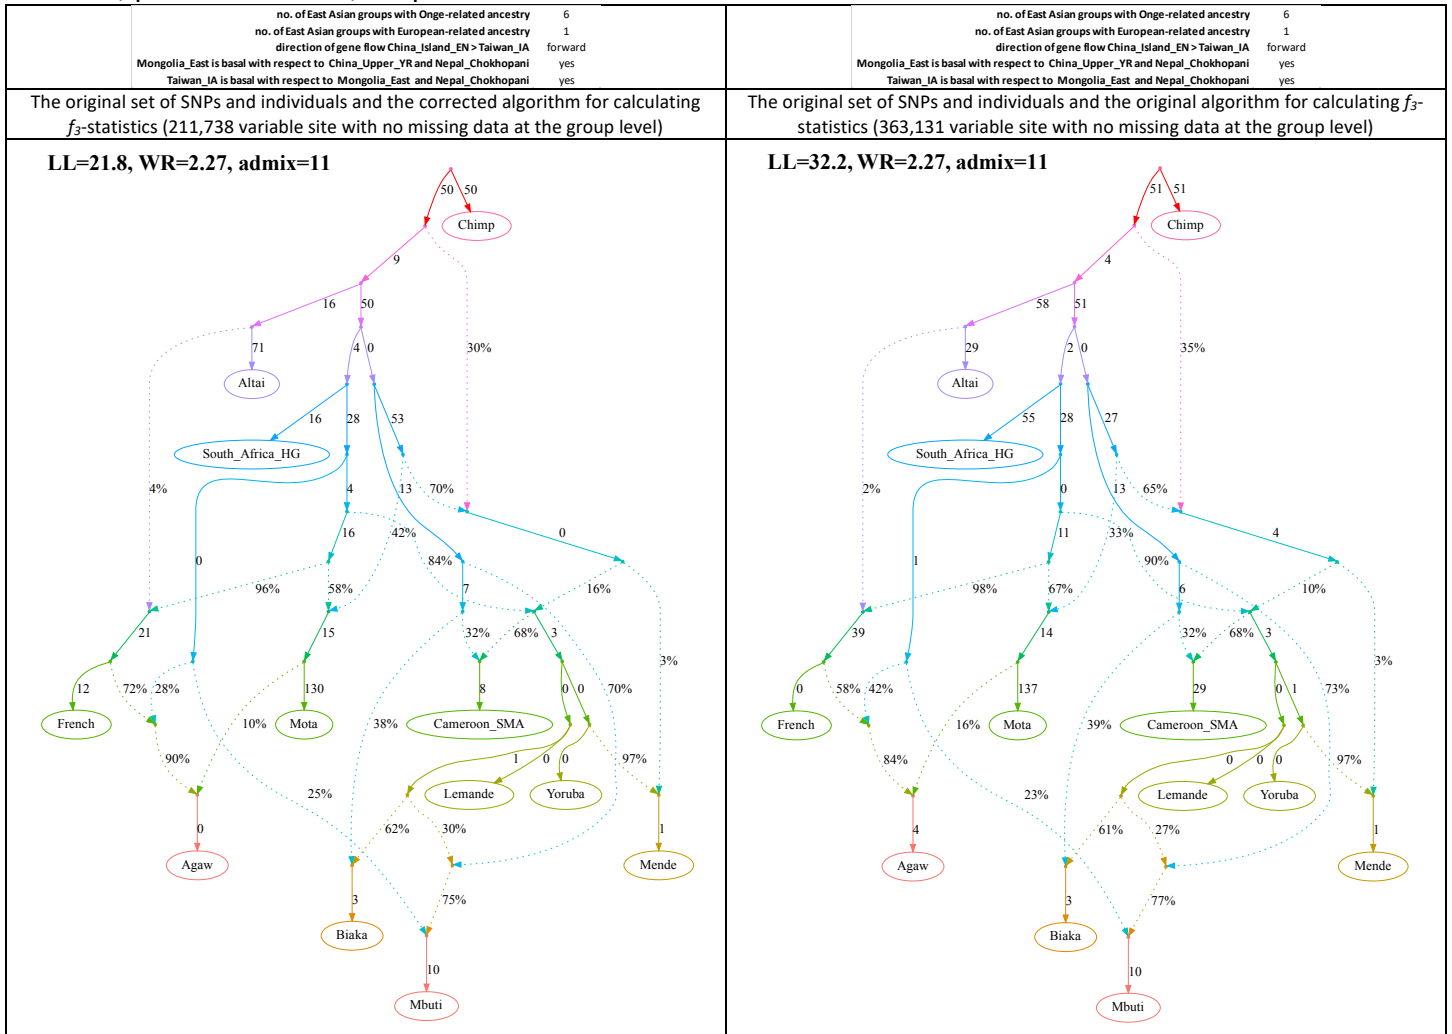

Selected claims by Lipson *et al.* 2020 relying on the admixture graph:

- 1) A lineage maximized in present-day West African groups (Lemande, Mende, and Yoruba) also contributed some ancestry to the ancient Shum Laka individual, and present-day Biaka and Mbuti;
- 2) another ancestry component in Shum Laka is a deep-branching lineage maximized in rainforest hunter-gatherers Biaka and Mbuti;
- 3) “super-archaic” ancestry (i.e., diverging at the modern human/Neanderthal split point or deeper) contributed to Biaka, Shum Laka, Mbuti, Lemande, Mende, and Yoruba;
- 4) a ghost modern human lineage (or lineages) contributed to Agaw, Mota, Biaka, Shum Laka, Mbuti, Lemande, Mende, and Yoruba.

c, selected alternative models fitting nominally better than the published one

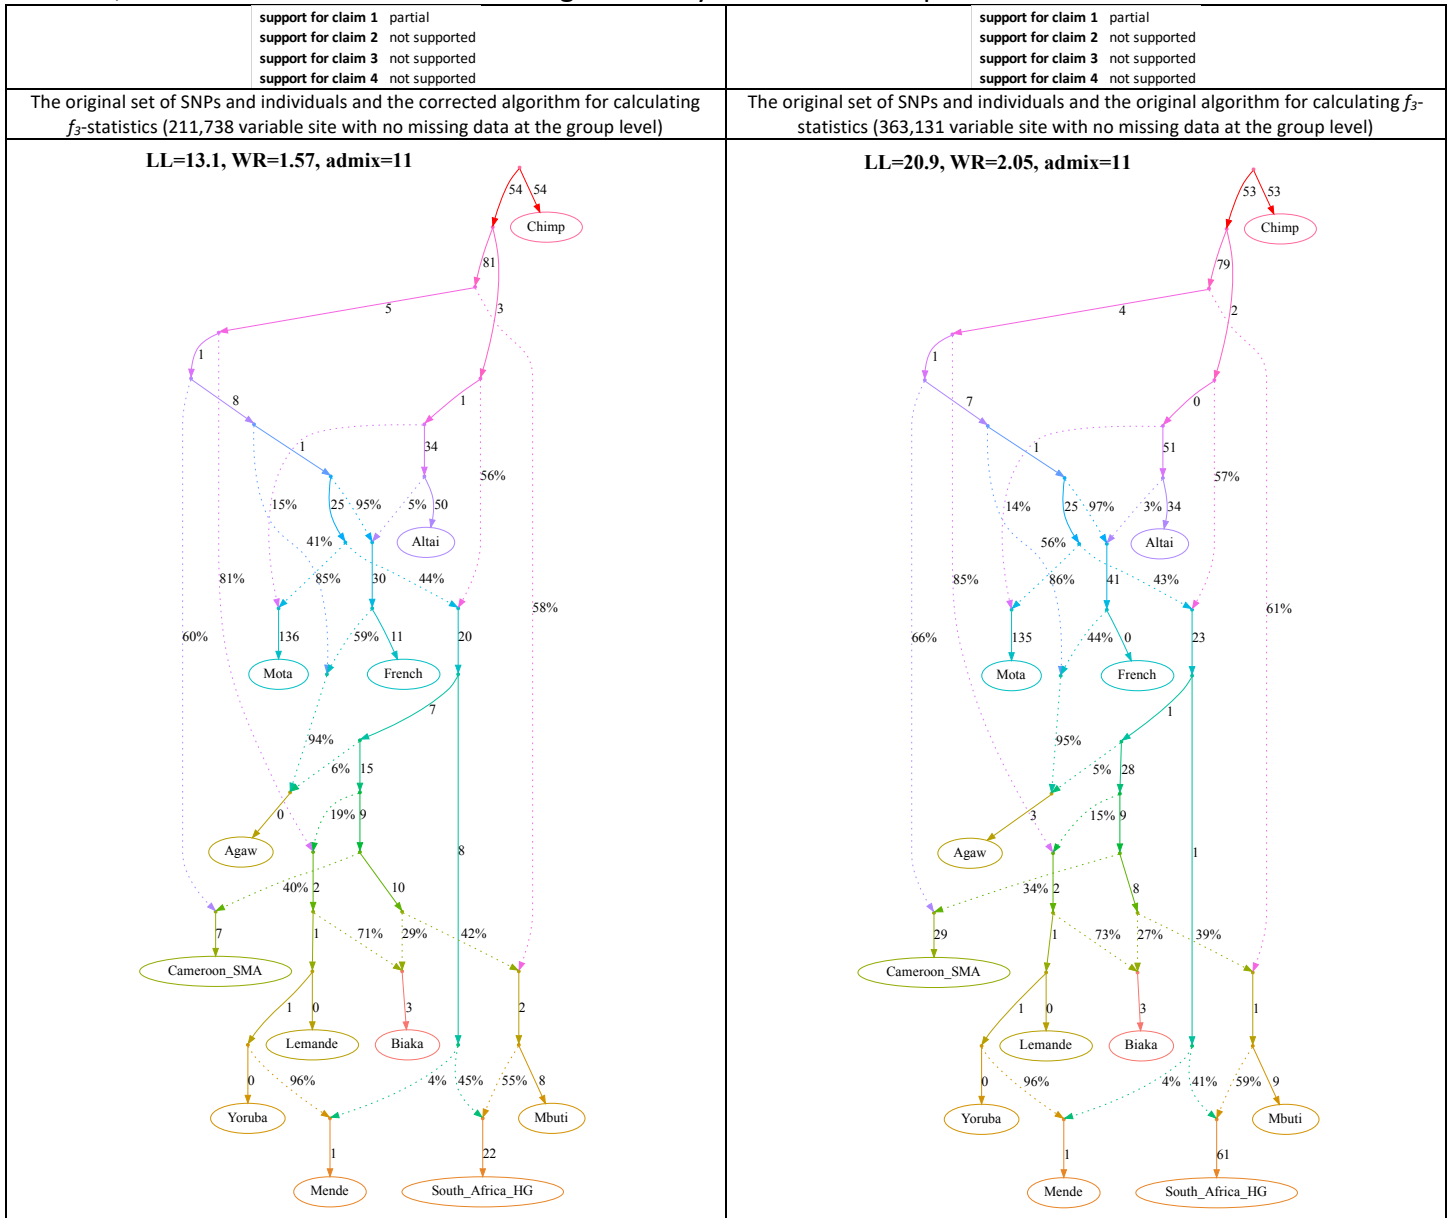

support for claim 1 not supported  
 support for claim 2 not supported  
 support for claim 3 partial  
 support for claim 4 not supported

support for claim 1 not supported  
 support for claim 2 not supported  
 support for claim 3 partial  
 support for claim 4 not supported

The original set of SNPs and individuals and the corrected algorithm for calculating  $f_3$ -statistics (211,738 variable site with no missing data at the group level)

The original set of SNPs and individuals and the original algorithm for calculating  $f_3$ -statistics (363,131 variable site with no missing data at the group level)

LL=15.1, WR=1.9, admix=11

LL=30.3, WR=2.72, admix=11

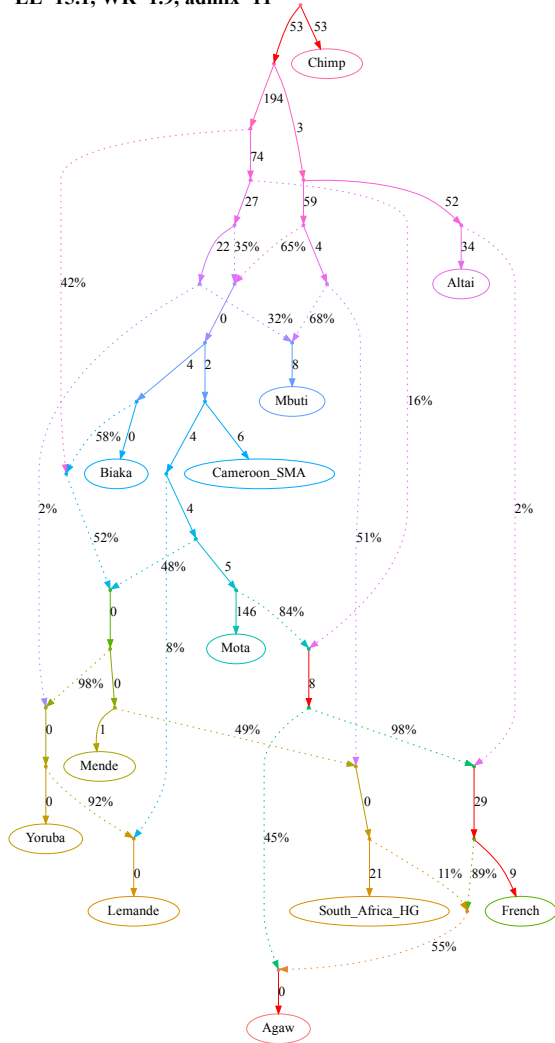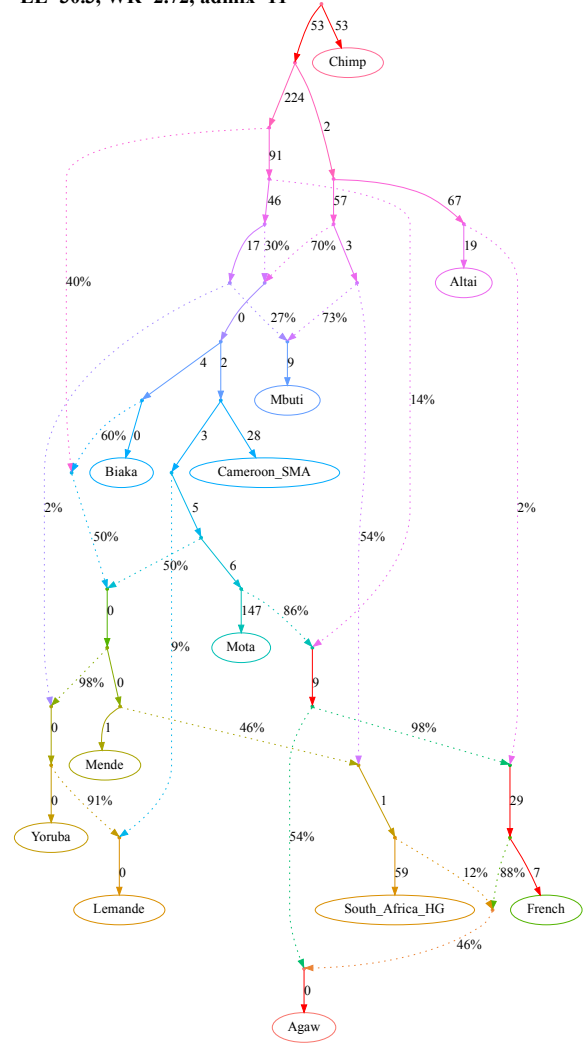

**d, selected alternative models fitting nominally better than the published one**

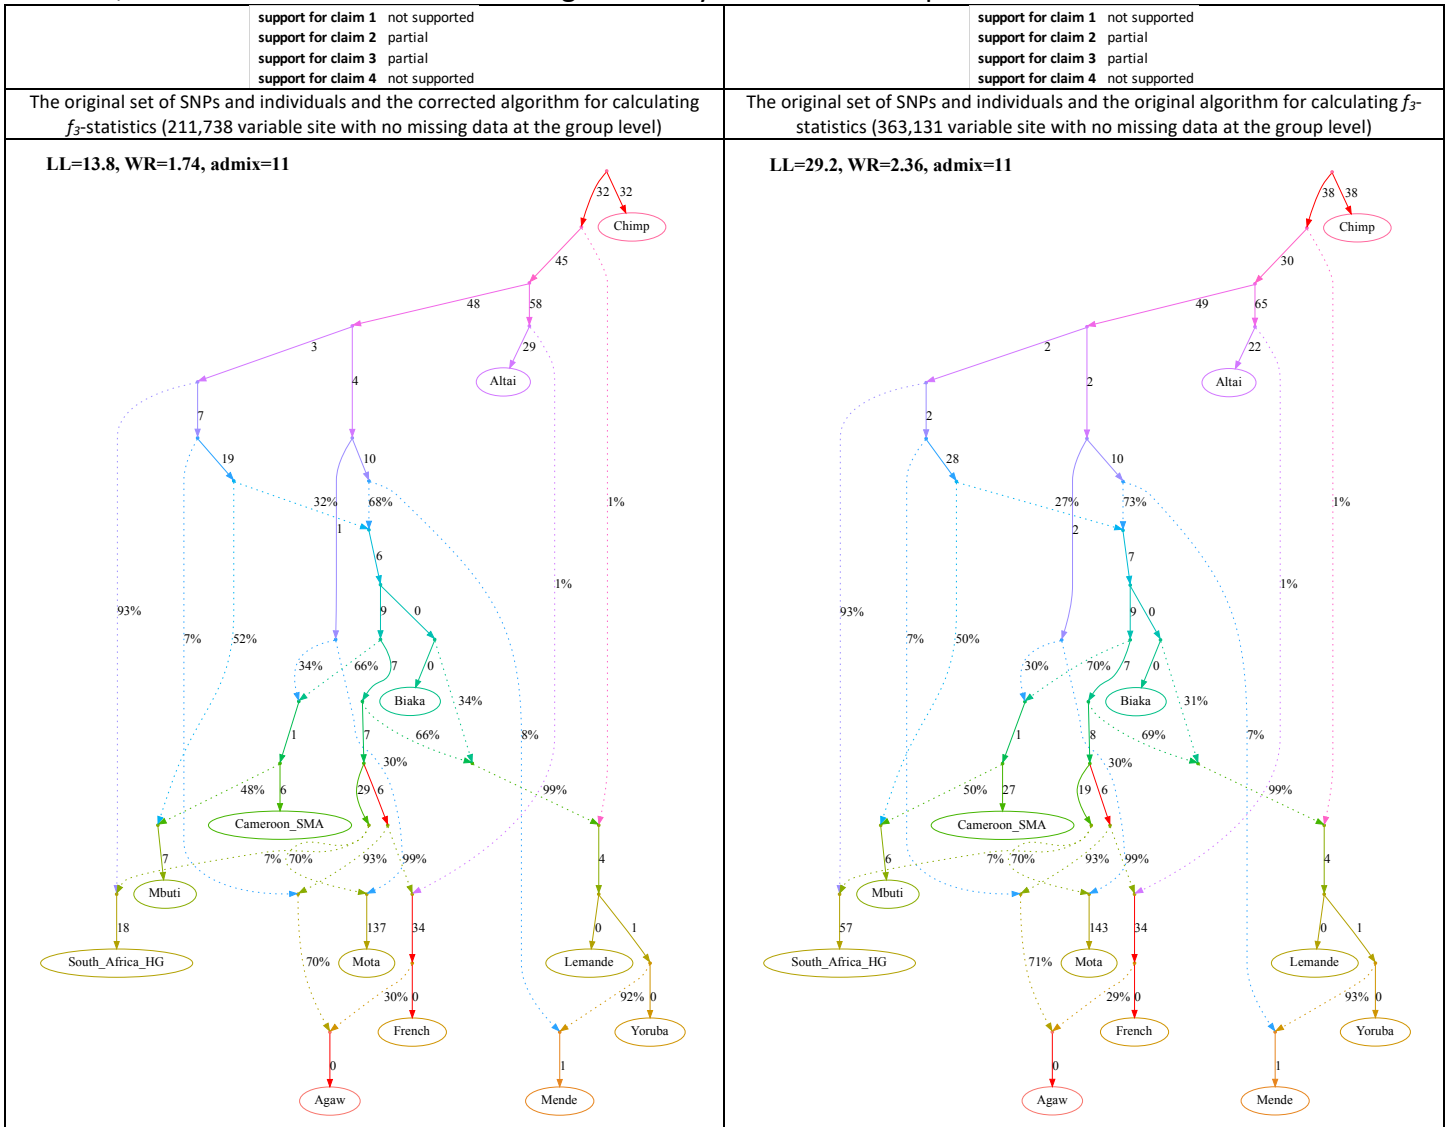

support for claim 1 partial  
 support for claim 2 not supported  
 support for claim 3 not supported  
 support for claim 4 partial

support for claim 1 partial  
 support for claim 2 not supported  
 support for claim 3 not supported  
 support for claim 4 partial

The original set of SNPs and individuals and the corrected algorithm for calculating  $f_3$ -statistics (211,738 variable site with no missing data at the group level)

The original set of SNPs and individuals and the original algorithm for calculating  $f_3$ -statistics (363,131 variable site with no missing data at the group level)

LL=16, WR=2.31, admix=11

LL=24.2, WR=2.44, admix=11

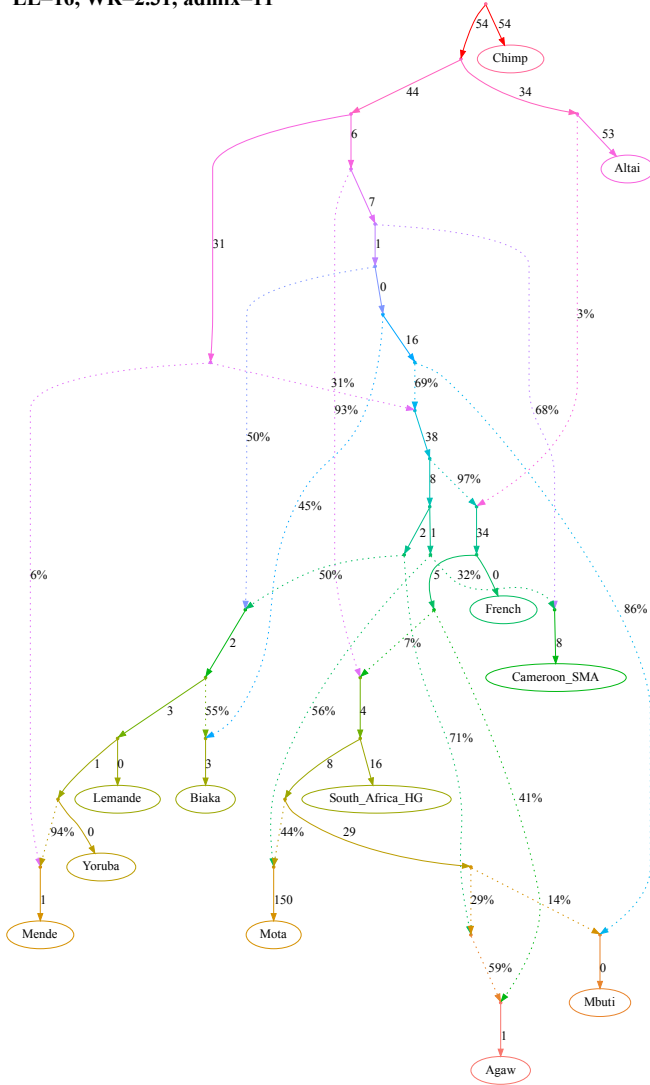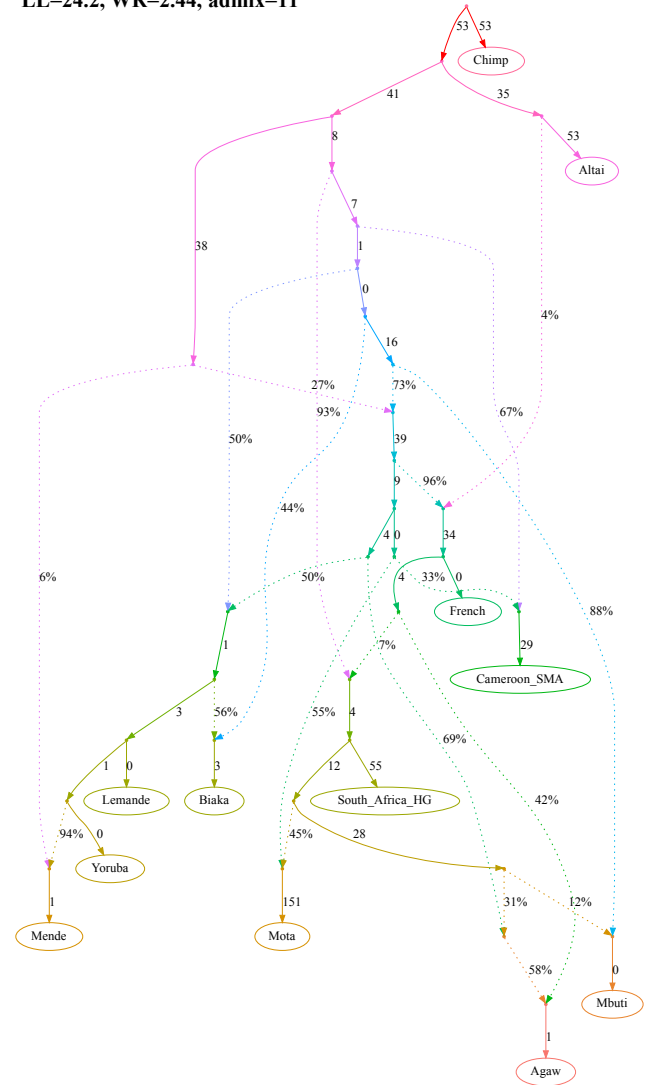

e, selected alternative models fitting nominally better than the published one

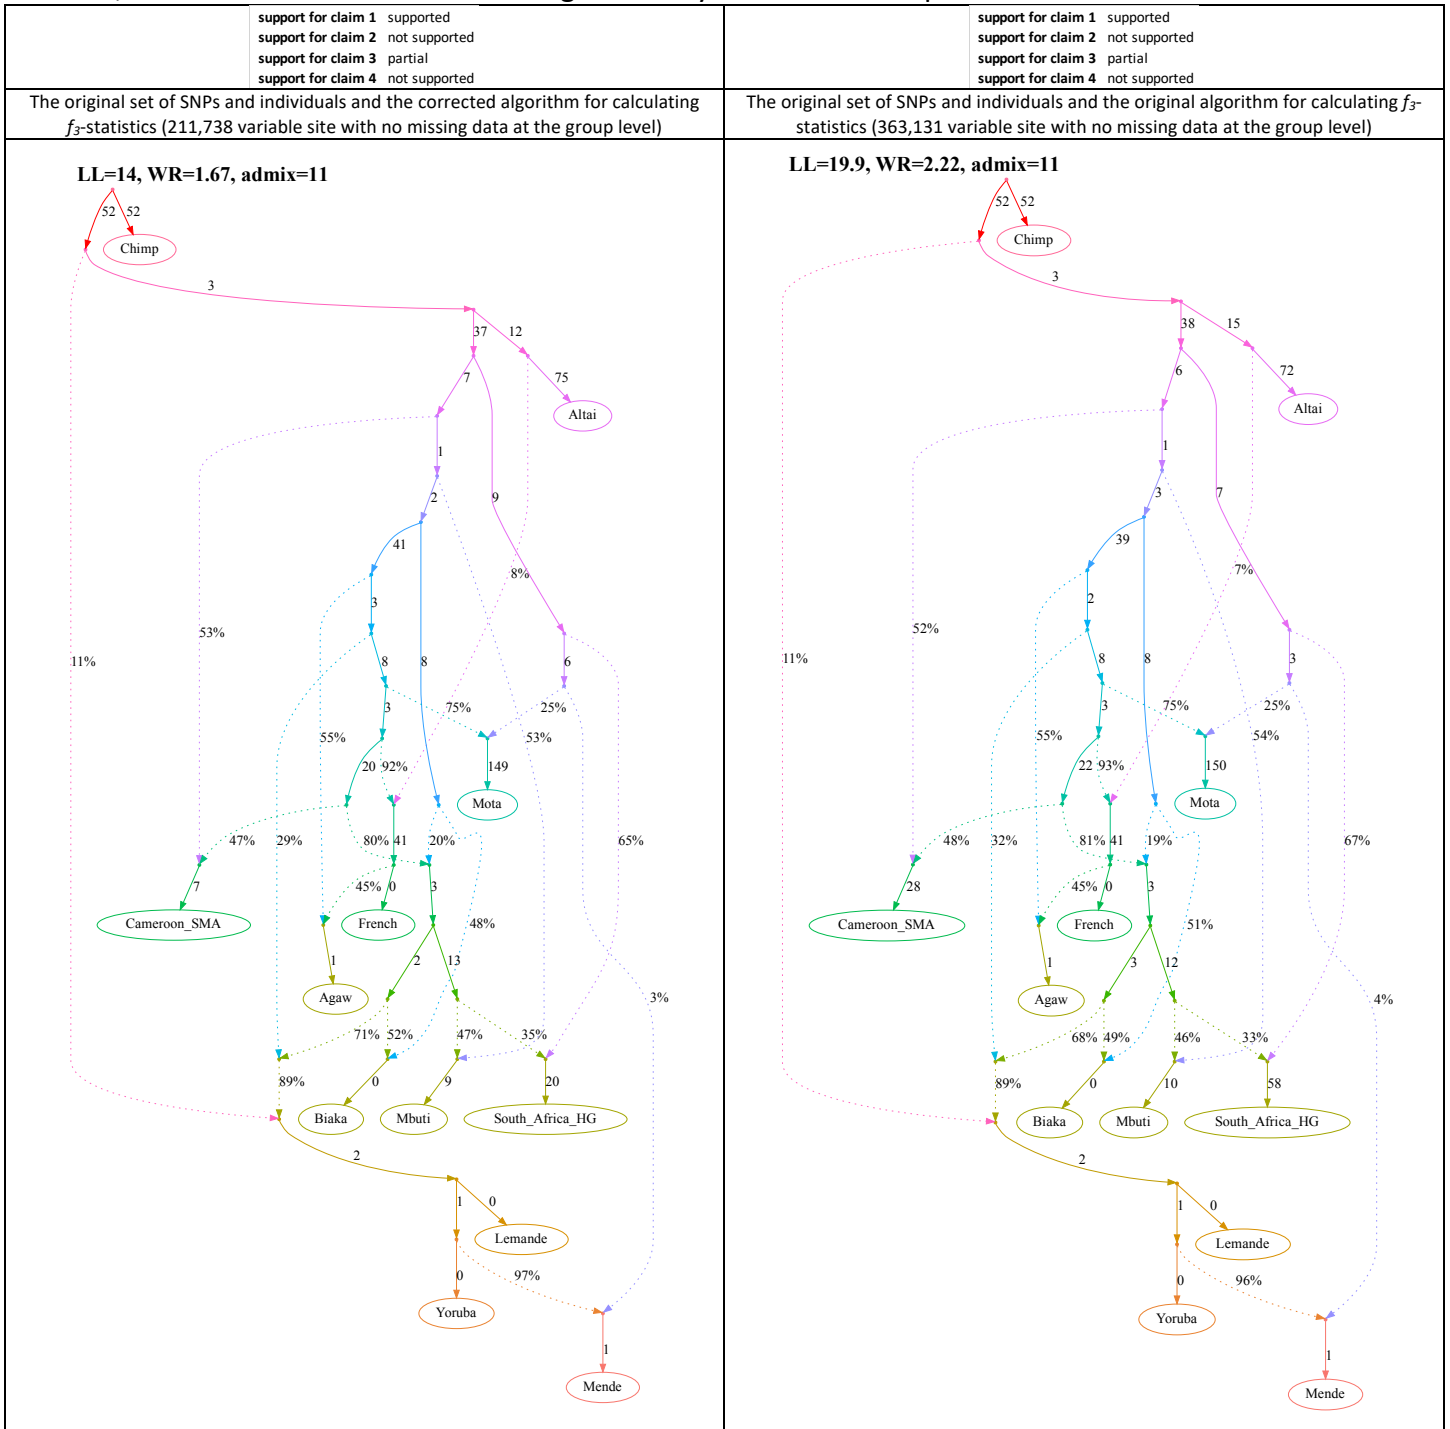

support for claim 1 not supported  
 support for claim 2 partial  
 support for claim 3 partial  
 support for claim 4 partial

support for claim 1 not supported  
 support for claim 2 partial  
 support for claim 3 partial  
 support for claim 4 partial

The original set of SNPs and individuals and the corrected algorithm for calculating  $f_3$ -statistics (211,738 variable site with no missing data at the group level)

The original set of SNPs and individuals and the original algorithm for calculating  $f_3$ -statistics (363,131 variable site with no missing data at the group level)

LL=14.6, WR=1.7, admix=11

LL=28.9, WR=2.45, admix=11

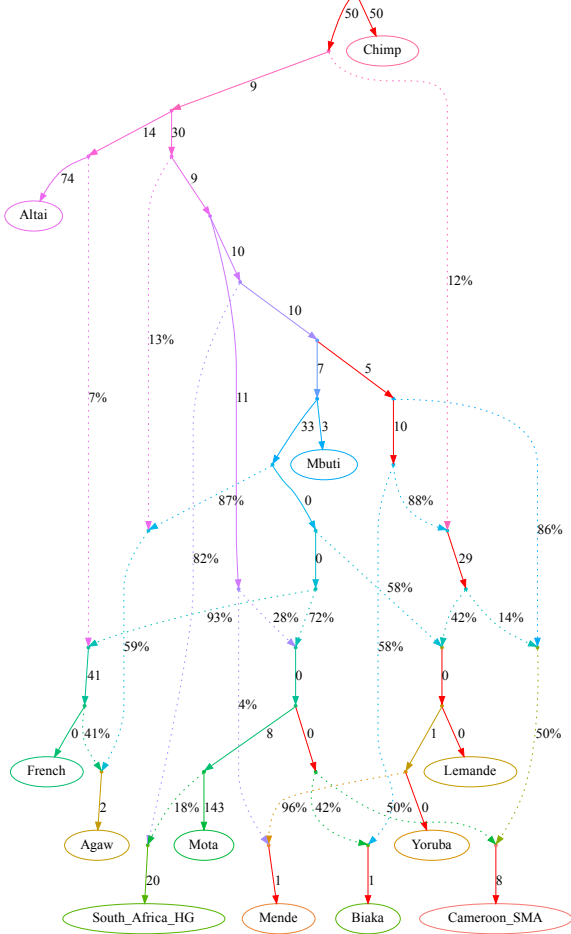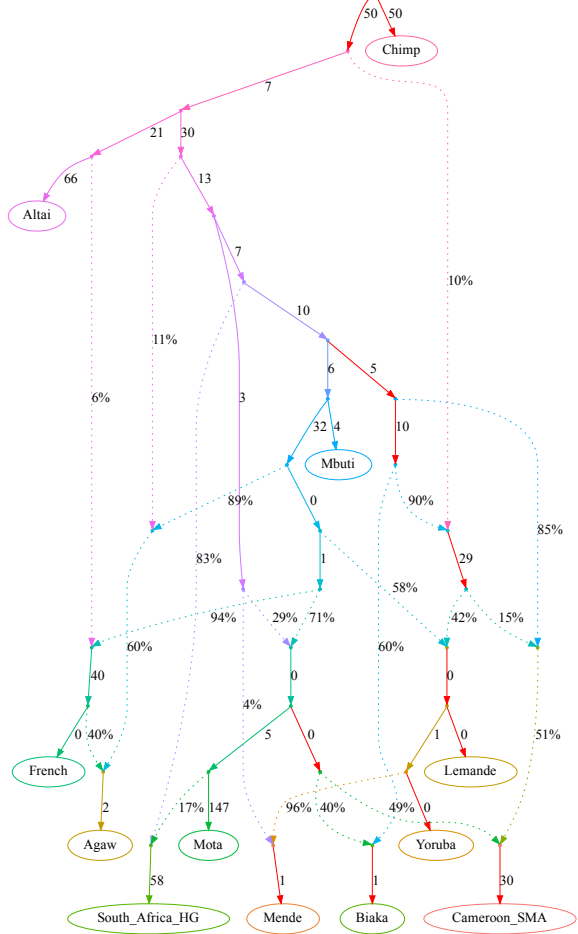



**f**, selected alternative models fitting nominally better than the published one

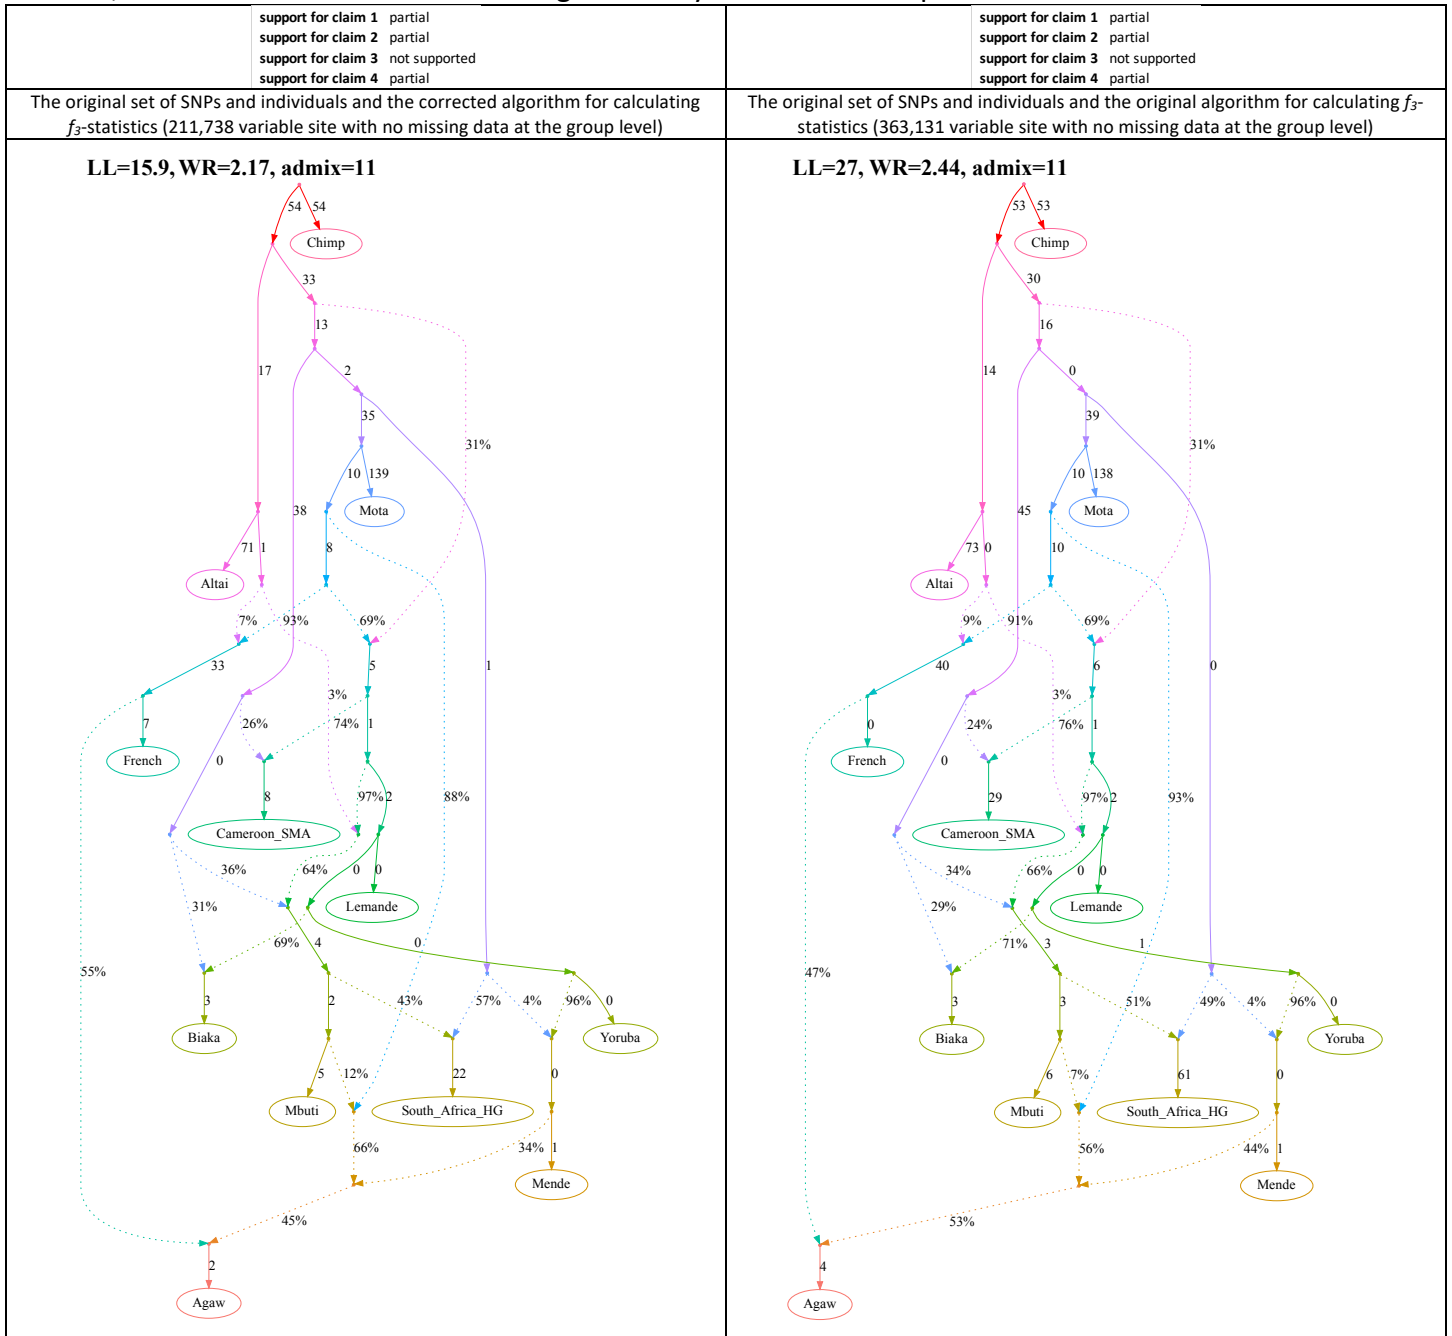

support for claim 1 partial  
 support for claim 2 not supported  
 support for claim 3 partial  
 support for claim 4 partial

support for claim 1 partial  
 support for claim 2 not supported  
 support for claim 3 partial  
 support for claim 4 partial

The original set of SNPs and individuals and the corrected algorithm for calculating  $f_3$ -statistics (211,738 variable site with no missing data at the group level)

The original set of SNPs and individuals and the original algorithm for calculating  $f_3$ -statistics (363,131 variable site with no missing data at the group level)

LL=16.1, WR=1.78, admix=11

LL=25, WR=2.08, admix=11

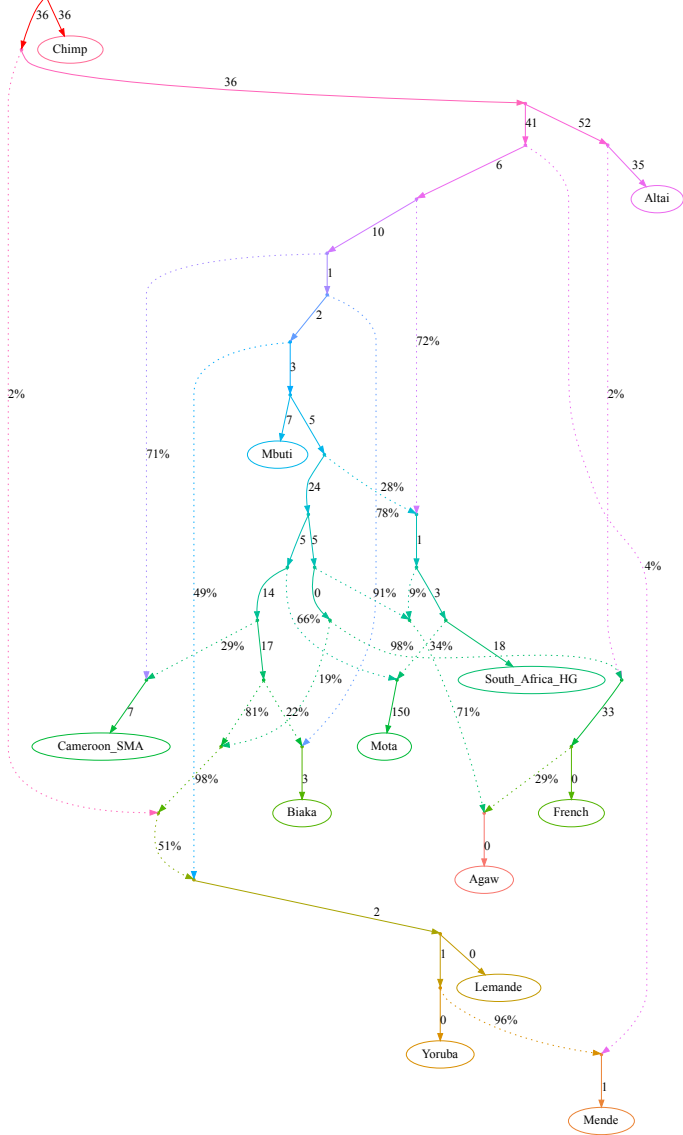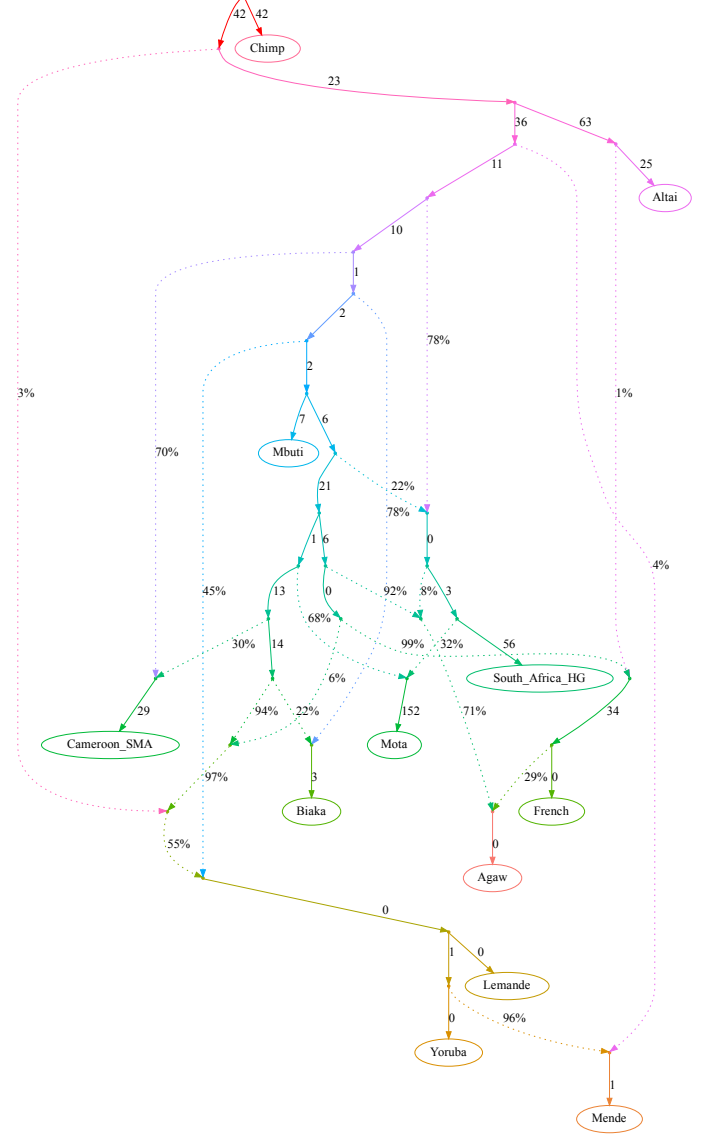

**g**, selected alternative models fitting nominally better than the published one

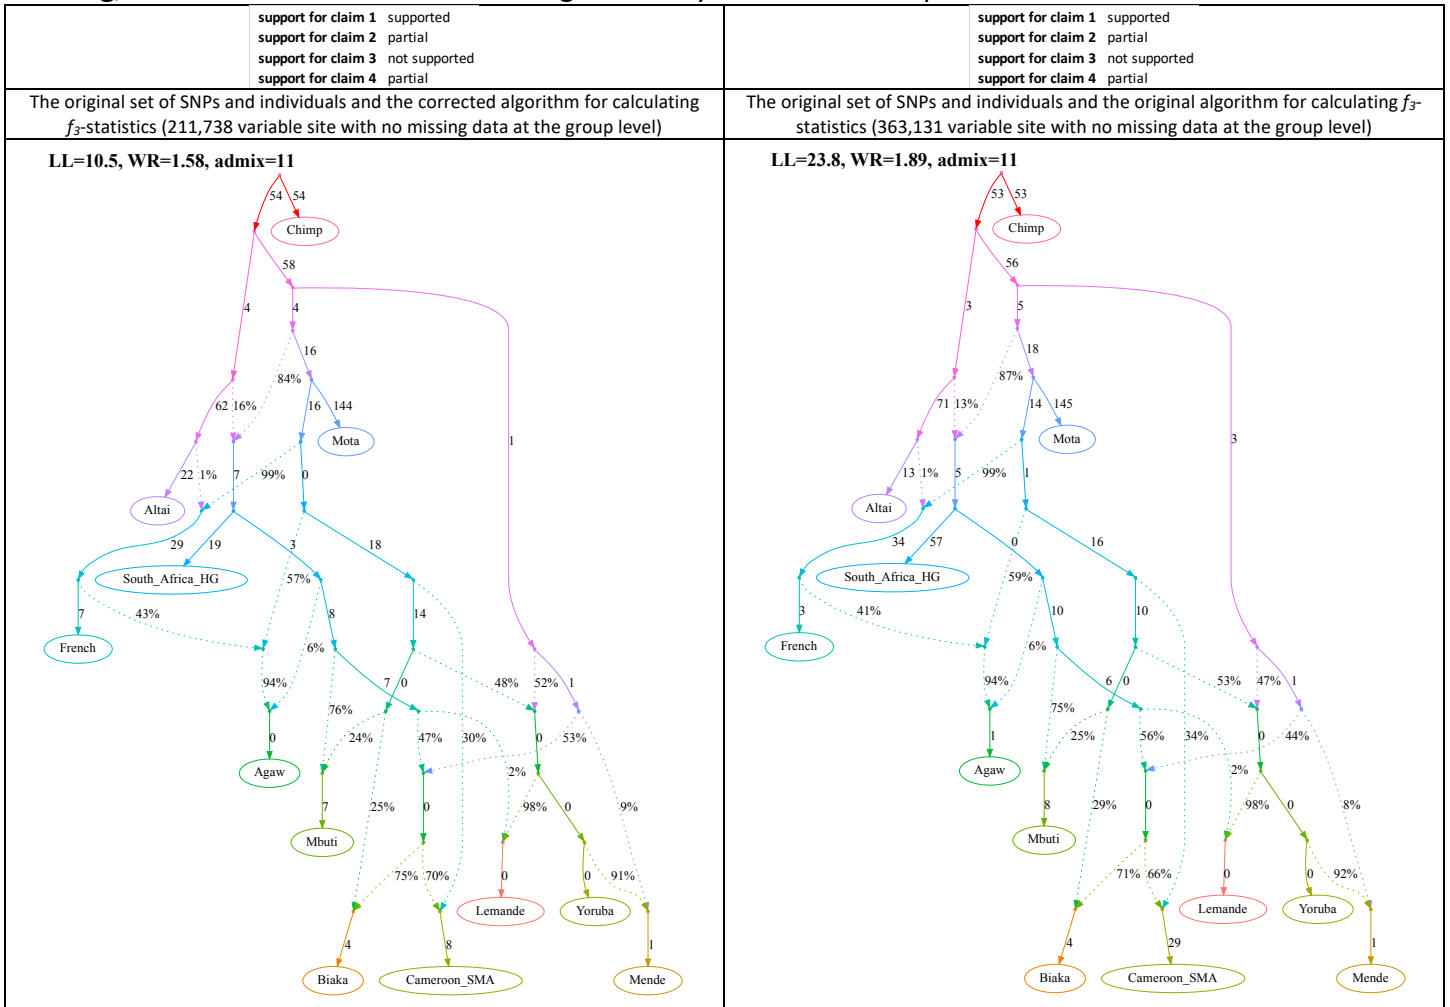

support for claim 1 partial  
 support for claim 2 partial  
 support for claim 3 supported  
 support for claim 4 not supported

support for claim 1 partial  
 support for claim 2 partial  
 support for claim 3 supported  
 support for claim 4 not supported

The original set of SNPs and individuals and the corrected algorithm for calculating  $f_3$ -statistics (211,738 variable site with no missing data at the group level)

The original set of SNPs and individuals and the original algorithm for calculating  $f_3$ -statistics (363,131 variable site with no missing data at the group level)

LL=13, WR=1.78, admix=11

LL=36.4, WR=3, admix=11

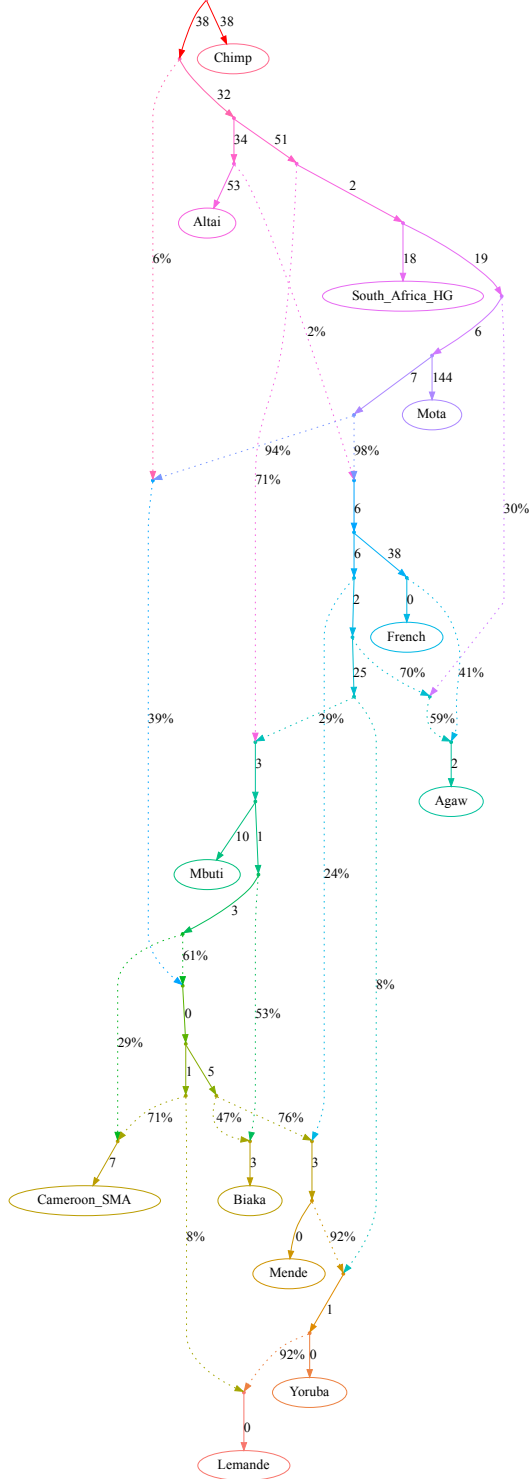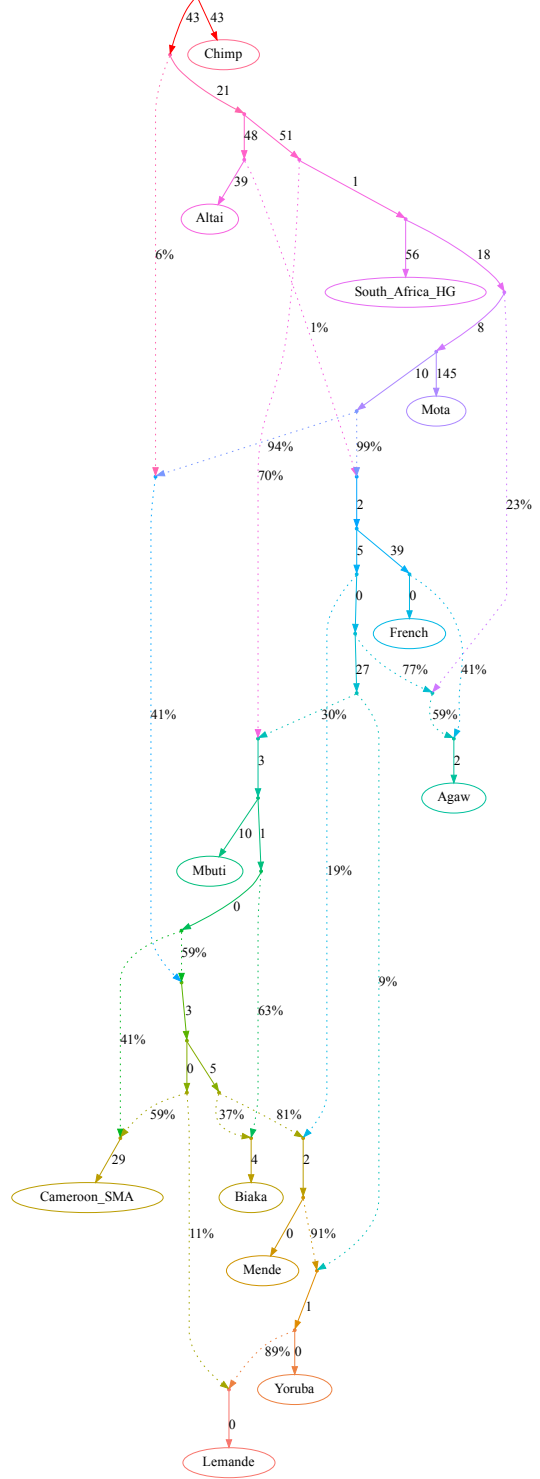

### h, selected alternative models fitting nominally better than the published one

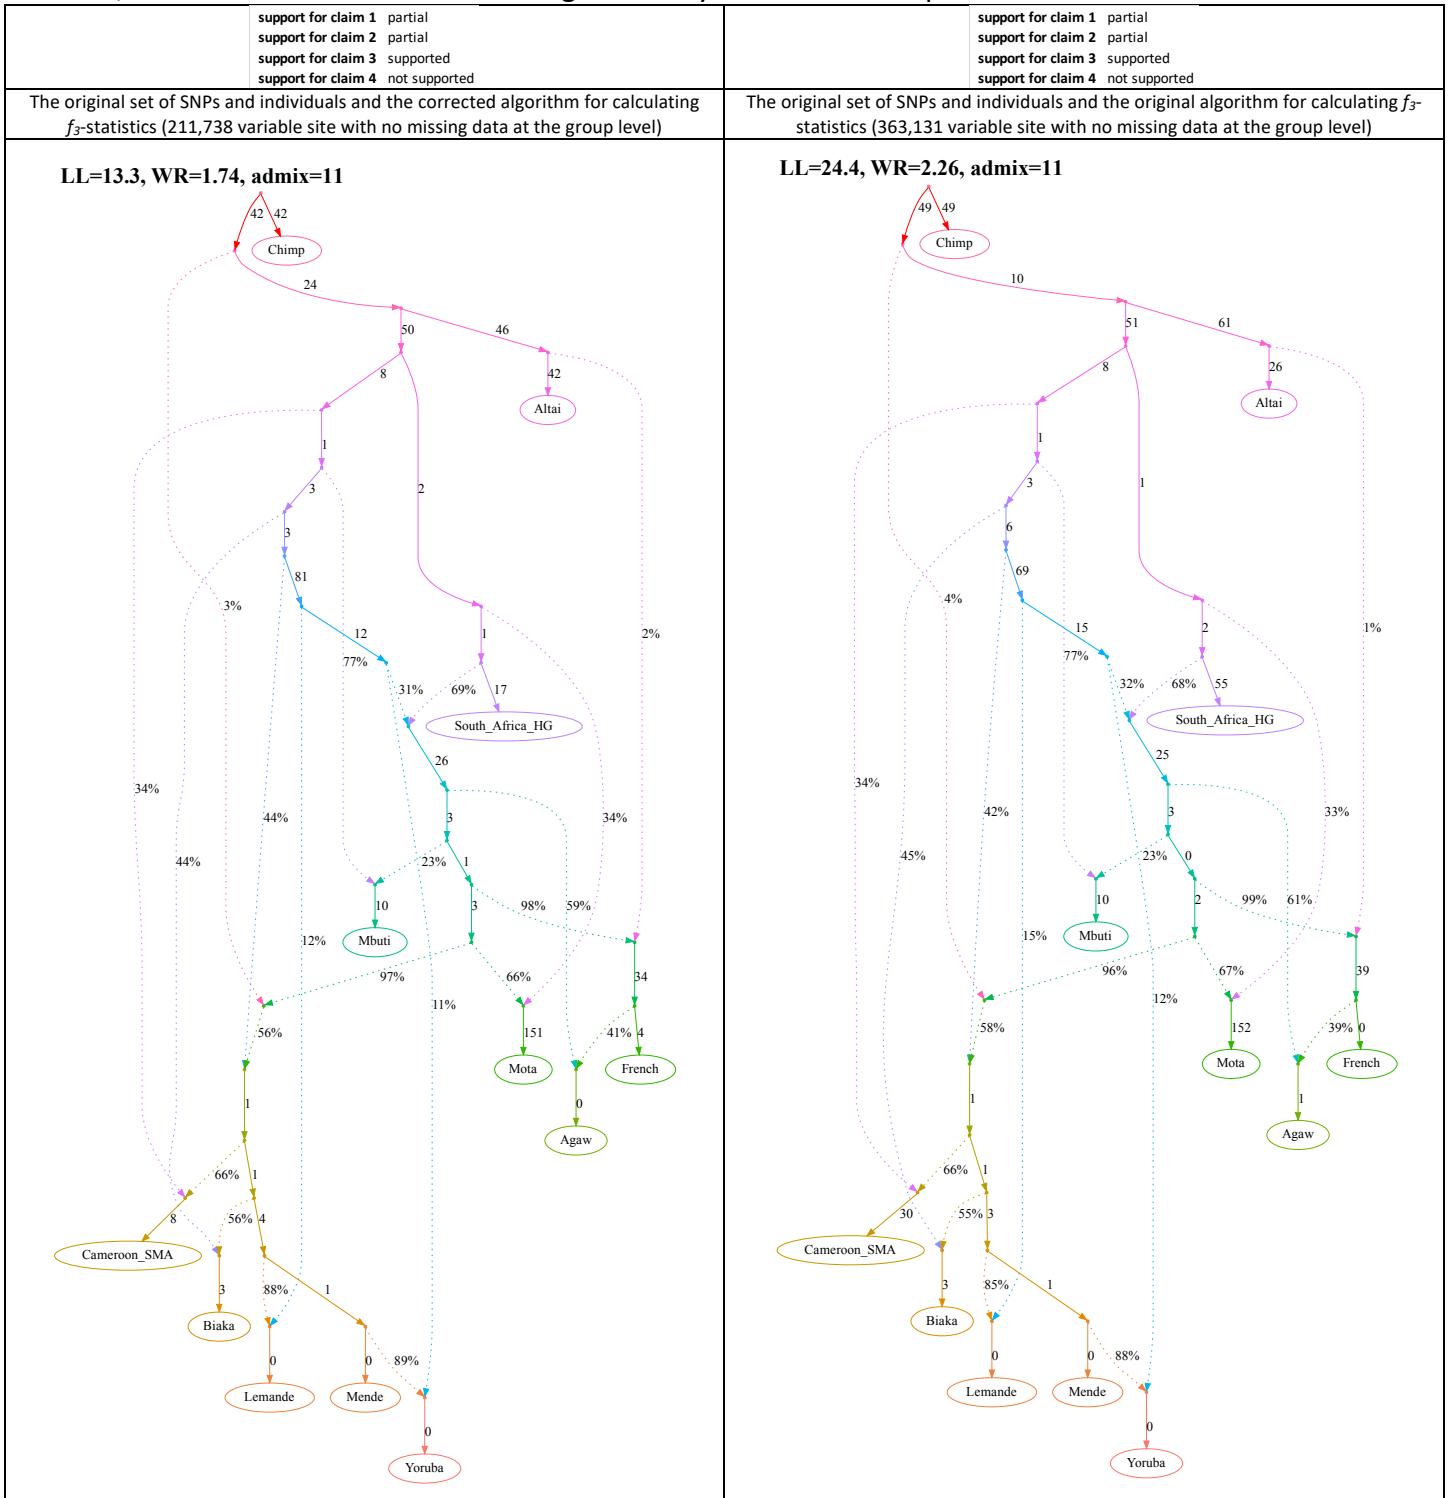

support for claim 1 partial  
 support for claim 2 partial  
 support for claim 3 supported  
 support for claim 4 not supported

The original set of SNPs and individuals and the corrected algorithm for calculating  $f_3$ -statistics (211,738 variable site with no missing data at the group level)

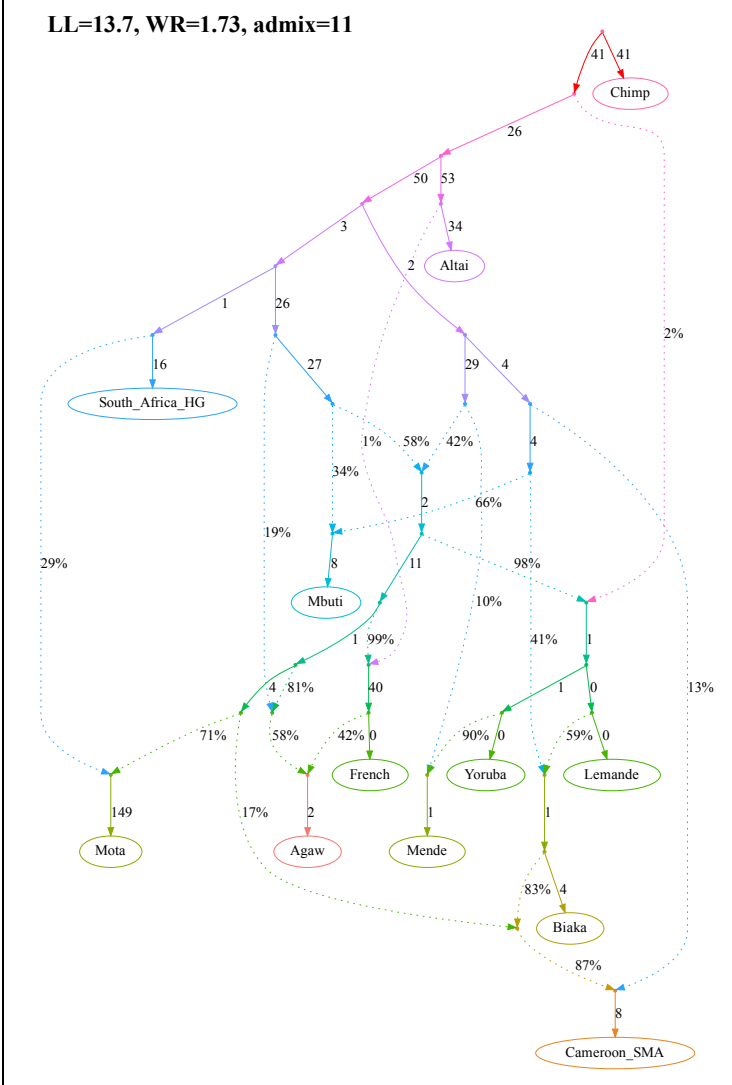

support for claim 1 partial  
 support for claim 2 partial  
 support for claim 3 supported  
 support for claim 4 not supported

The original set of SNPs and individuals and the original algorithm for calculating  $f_3$ -statistics (363,131 variable site with no missing data at the group level)

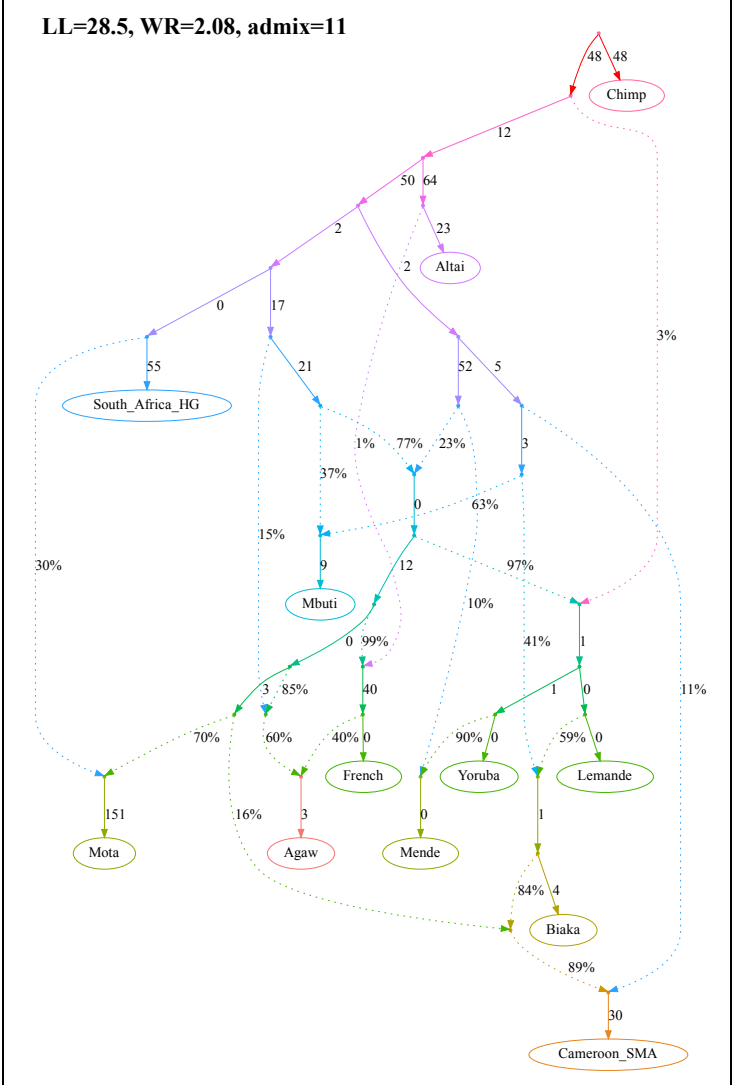

i, selected alternative models fitting nominally better than the published one

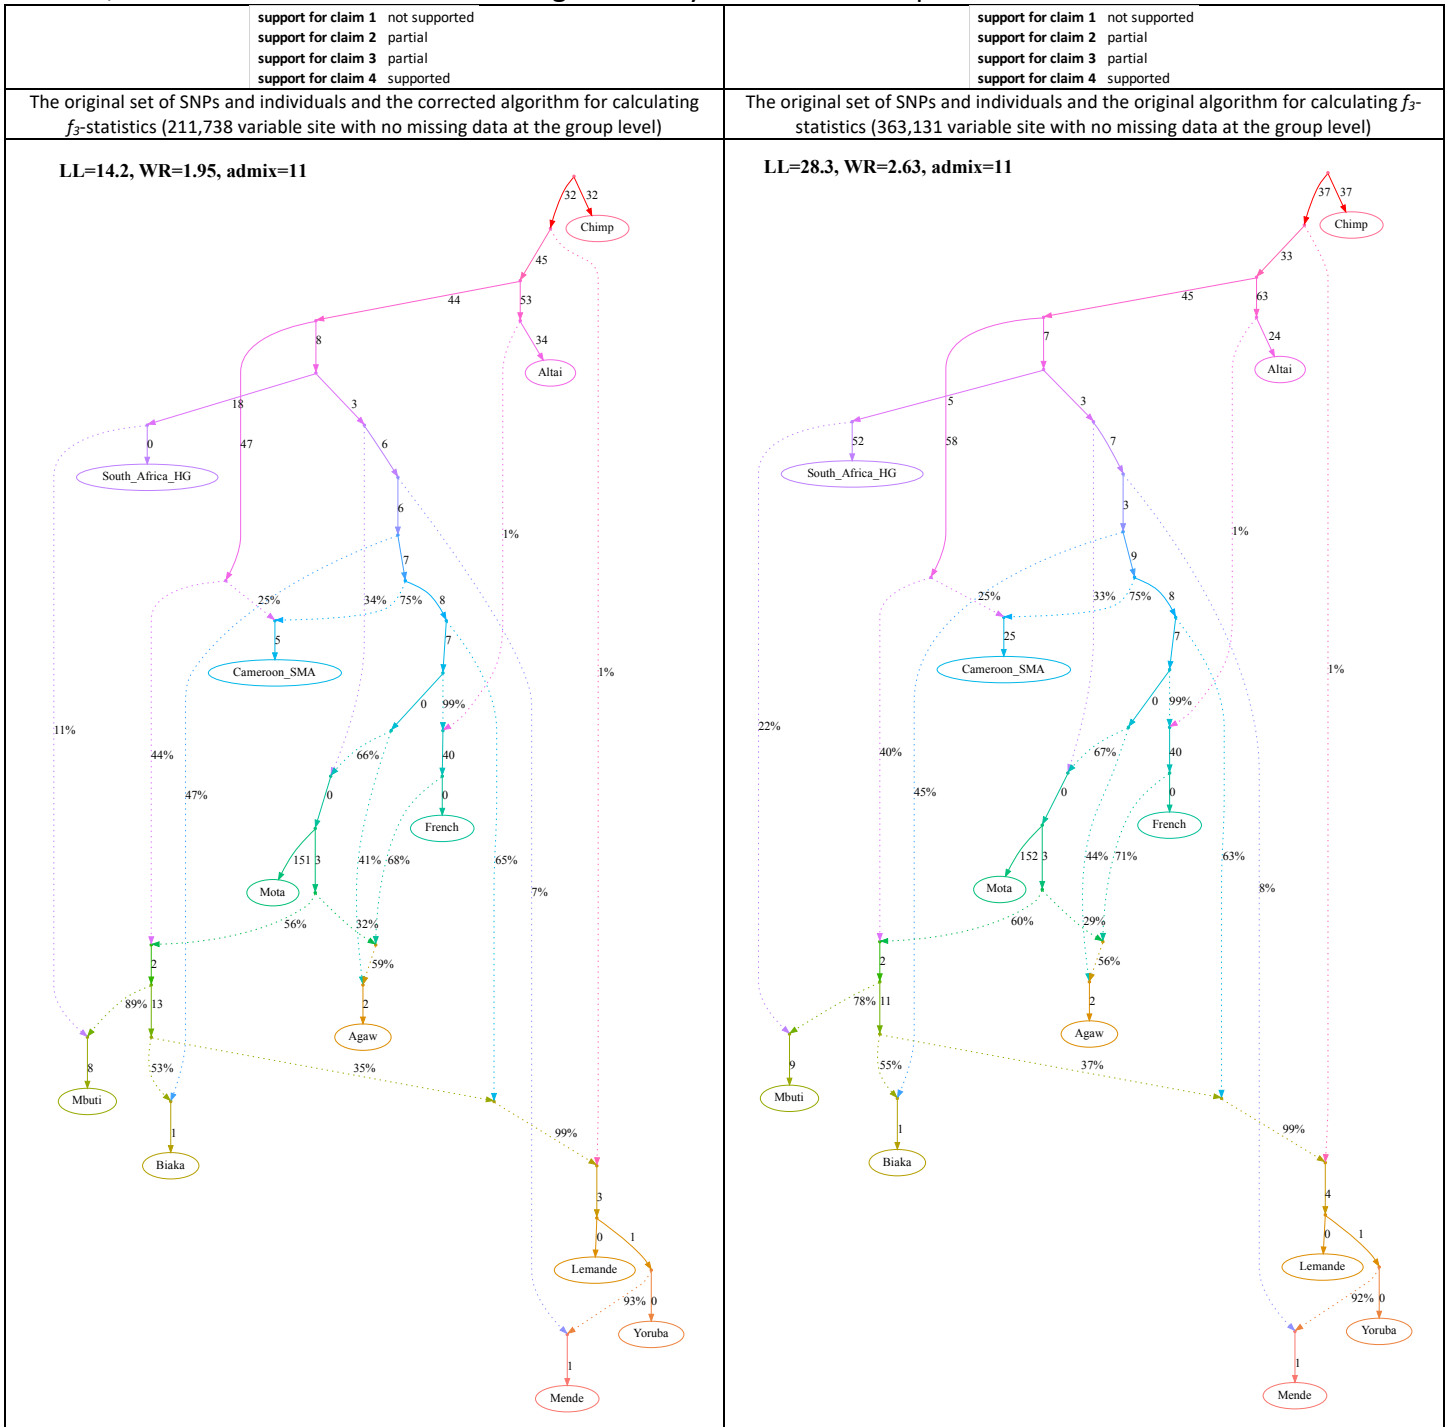

|                                                                                                                                  |                                                                                                                                  |
|----------------------------------------------------------------------------------------------------------------------------------|----------------------------------------------------------------------------------------------------------------------------------|
| support for claim 1 supported<br>support for claim 2 partial<br>support for claim 3 not supported<br>support for claim 4 partial | support for claim 1 supported<br>support for claim 2 partial<br>support for claim 3 not supported<br>support for claim 4 partial |
|----------------------------------------------------------------------------------------------------------------------------------|----------------------------------------------------------------------------------------------------------------------------------|

The original set of SNPs and individuals and the corrected algorithm for calculating  $f_3$ -statistics (211,738 variable site with no missing data at the group level)

The original set of SNPs and individuals and the original algorithm for calculating  $f_3$ -statistics (363,131 variable site with no missing data at the group level)

LL=14.9, WR=1.64, admix=11

LL=24.1, WR=2.08, admix=11

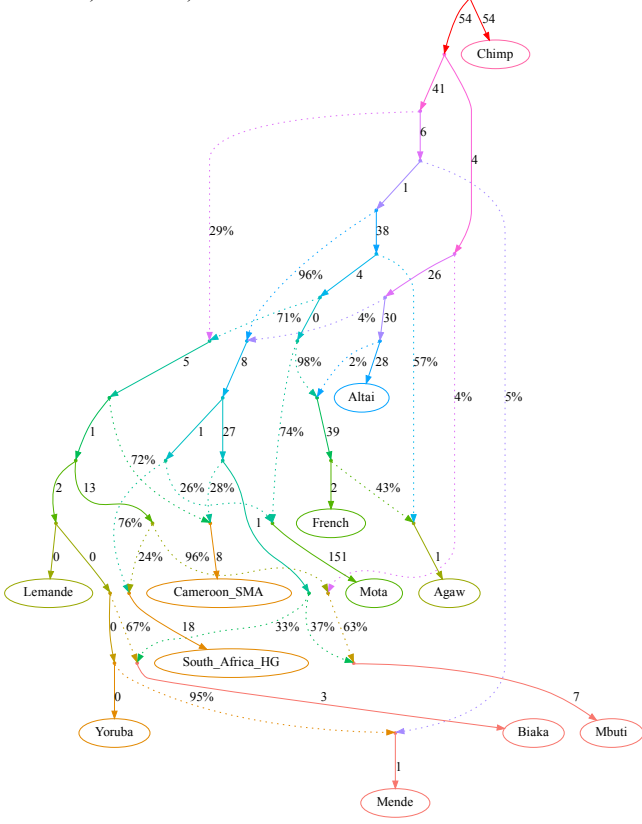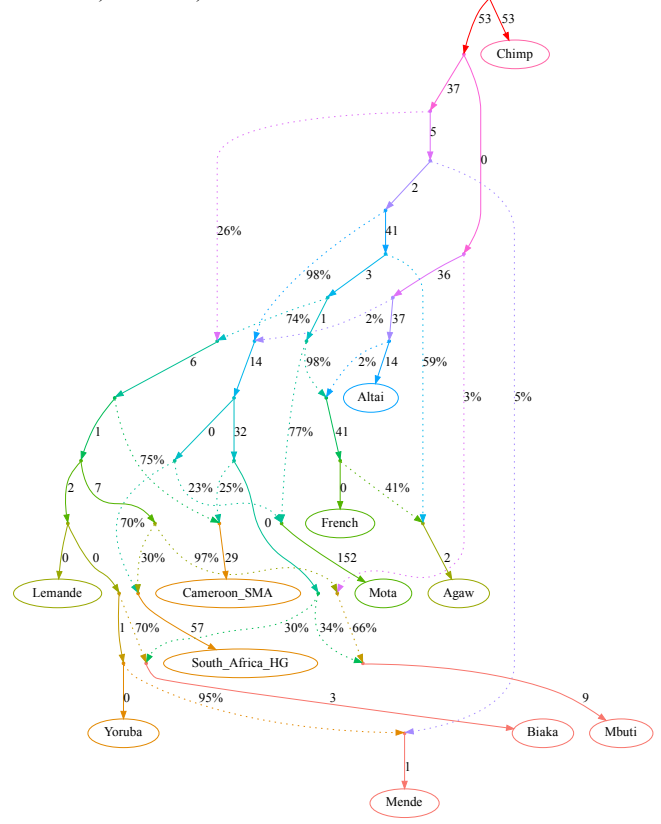



**j**, selected alternative models fitting nominally better than the published one

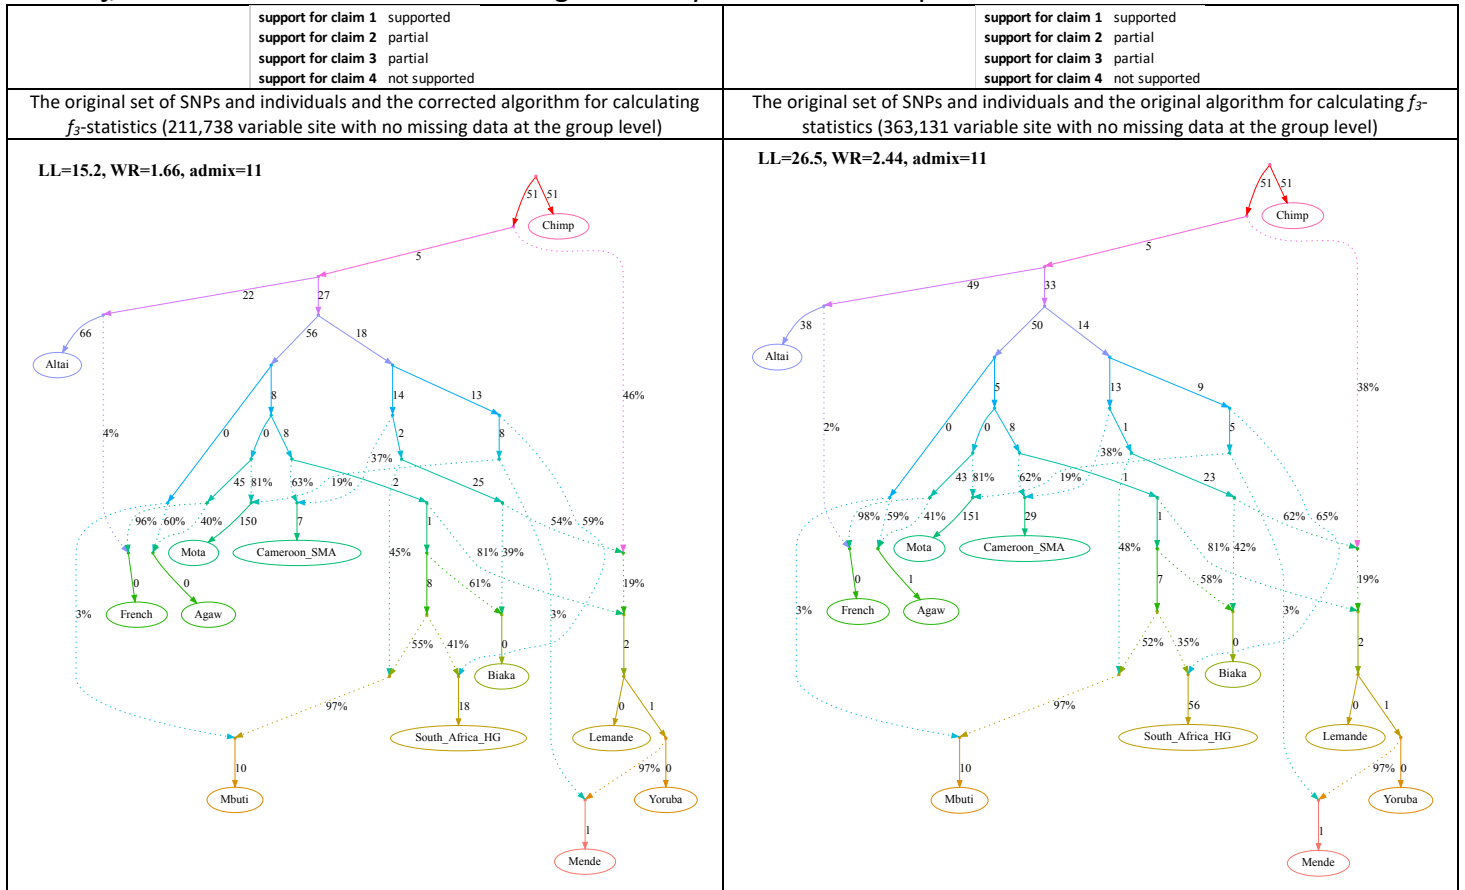

support for claim 1 supported  
 support for claim 2 not supported  
 support for claim 3 partial  
 support for claim 4 partial

support for claim 1 supported  
 support for claim 2 not supported  
 support for claim 3 partial  
 support for claim 4 partial

The original set of SNPs and individuals and the corrected algorithm for calculating  $f_3$ -statistics (211,738 variable site with no missing data at the group level)

The original set of SNPs and individuals and the original algorithm for calculating  $f_3$ -statistics (363,131 variable site with no missing data at the group level)

LL=15.8, WR=1.78, admix=11

LL=24.3, WR=2.49, admix=11

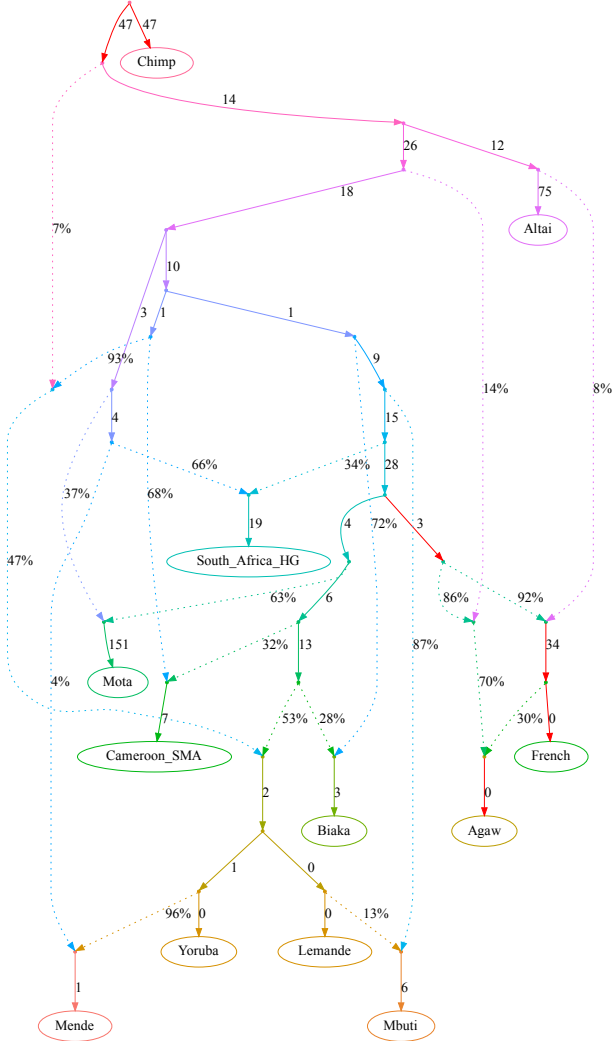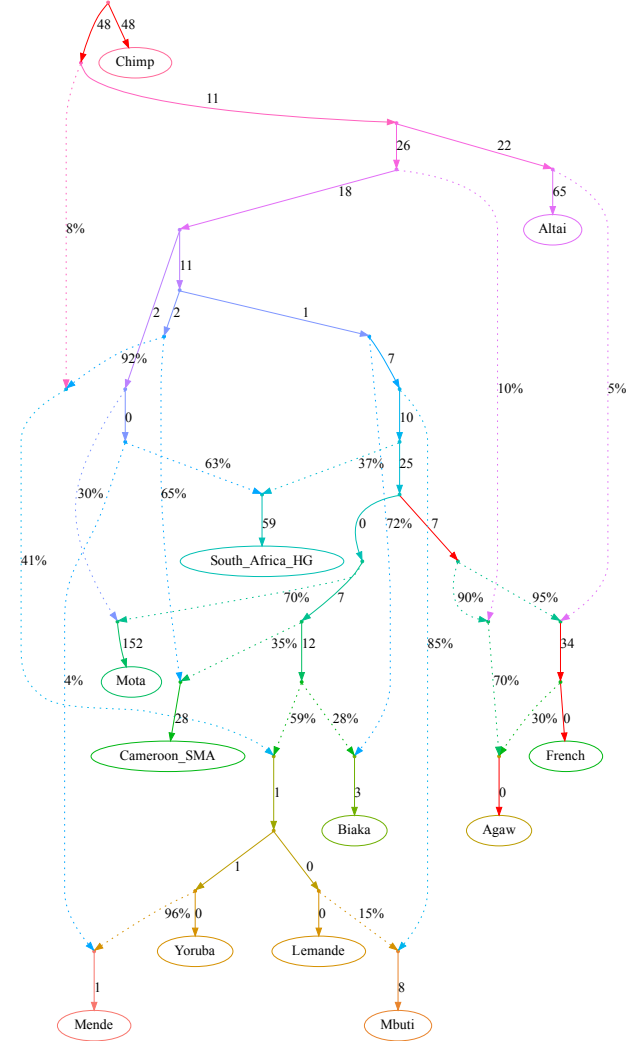

**k, selected alternative models fitting nominally better than the published one**

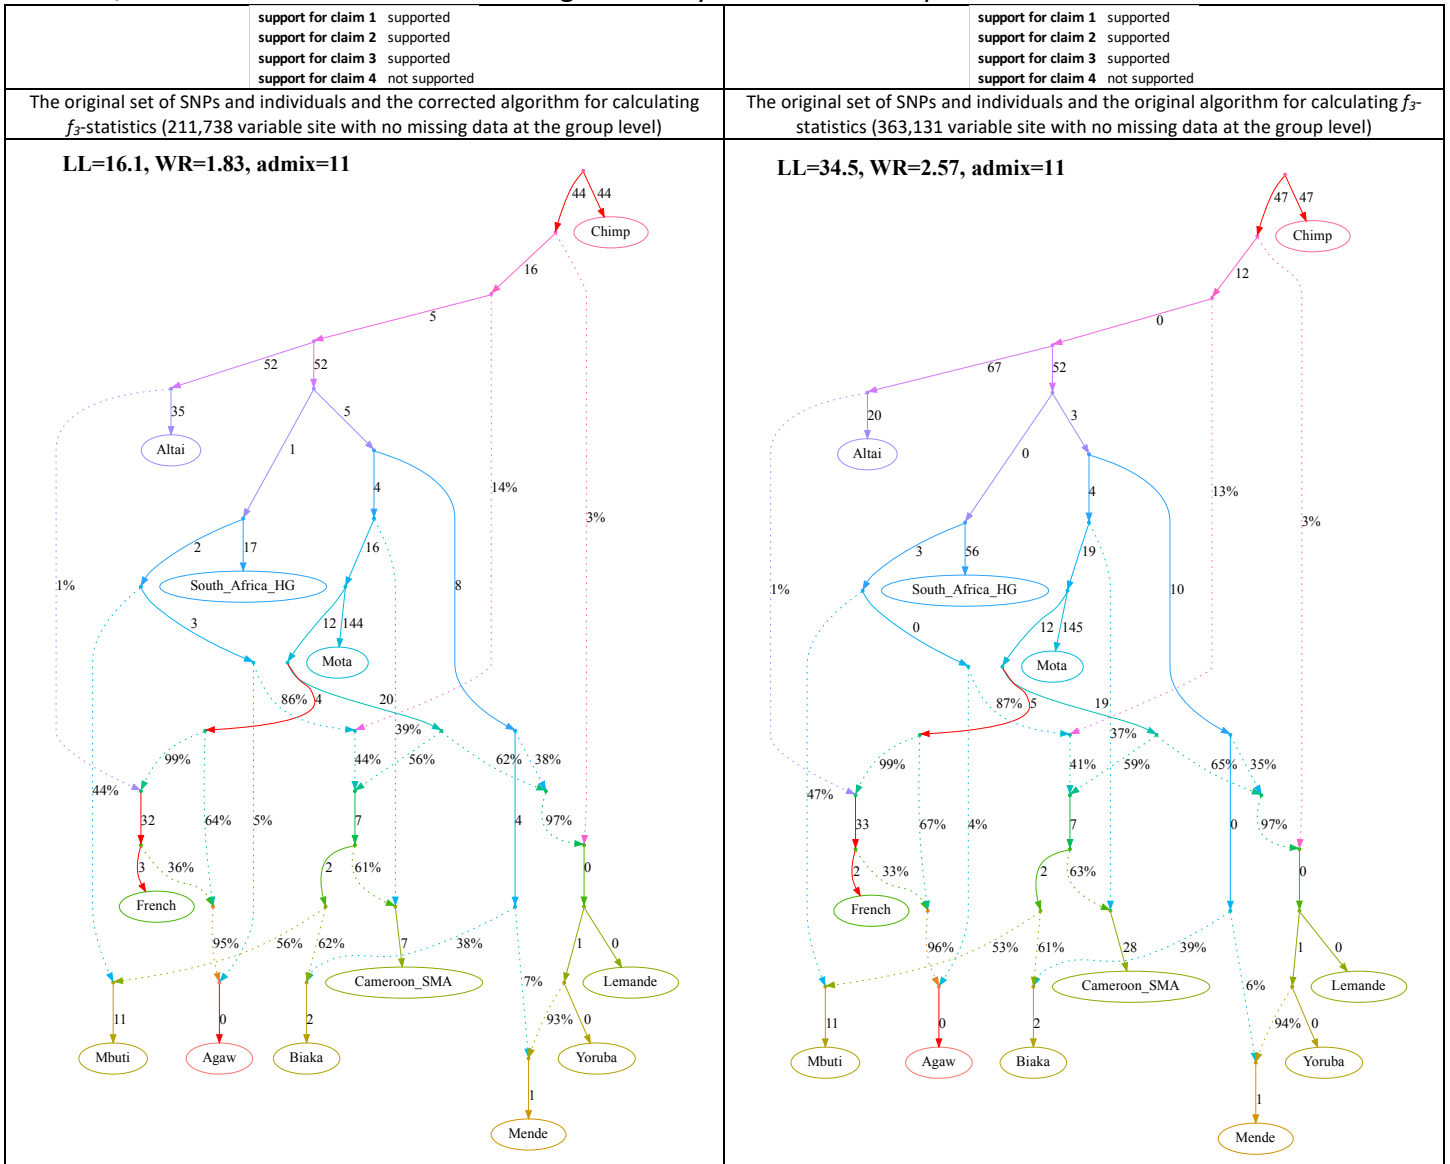

support for claim 1 partial  
 support for claim 2 partial  
 support for claim 3 partial  
 support for claim 4 partial

support for claim 1 partial  
 support for claim 2 partial  
 support for claim 3 partial  
 support for claim 4 partial

The original set of SNPs and individuals and the corrected algorithm for calculating  $f_3$ -statistics (211,738 variable site with no missing data at the group level)

The original set of SNPs and individuals and the original algorithm for calculating  $f_3$ -statistics (363,131 variable site with no missing data at the group level)

**LL=13.3, WR=1.78, admix=11**

**LL=23.3, WR=2.28, admix=11**

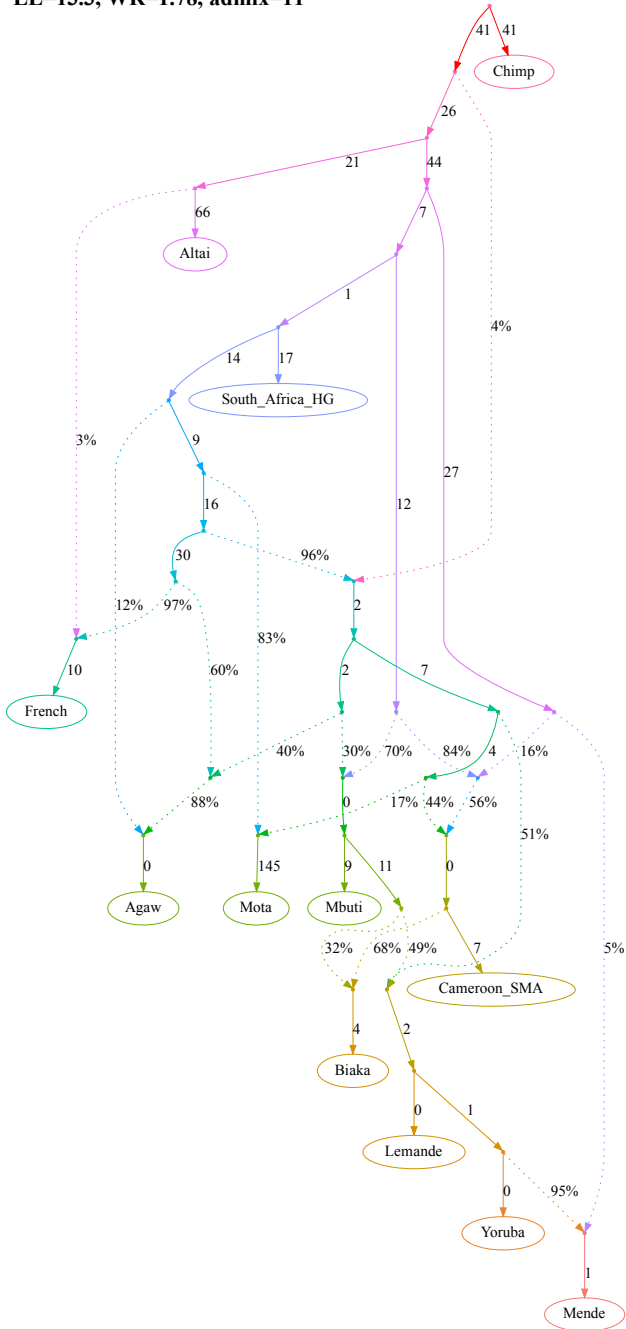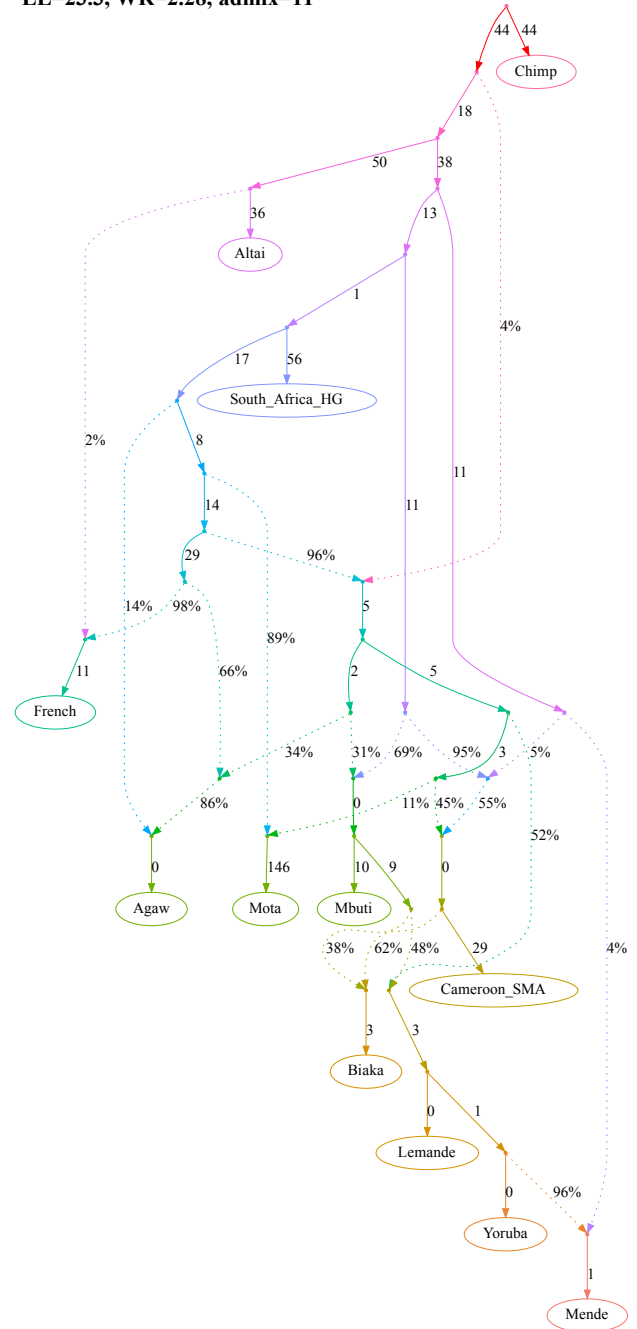

I, selected alternative models fitting nominally better than the published one

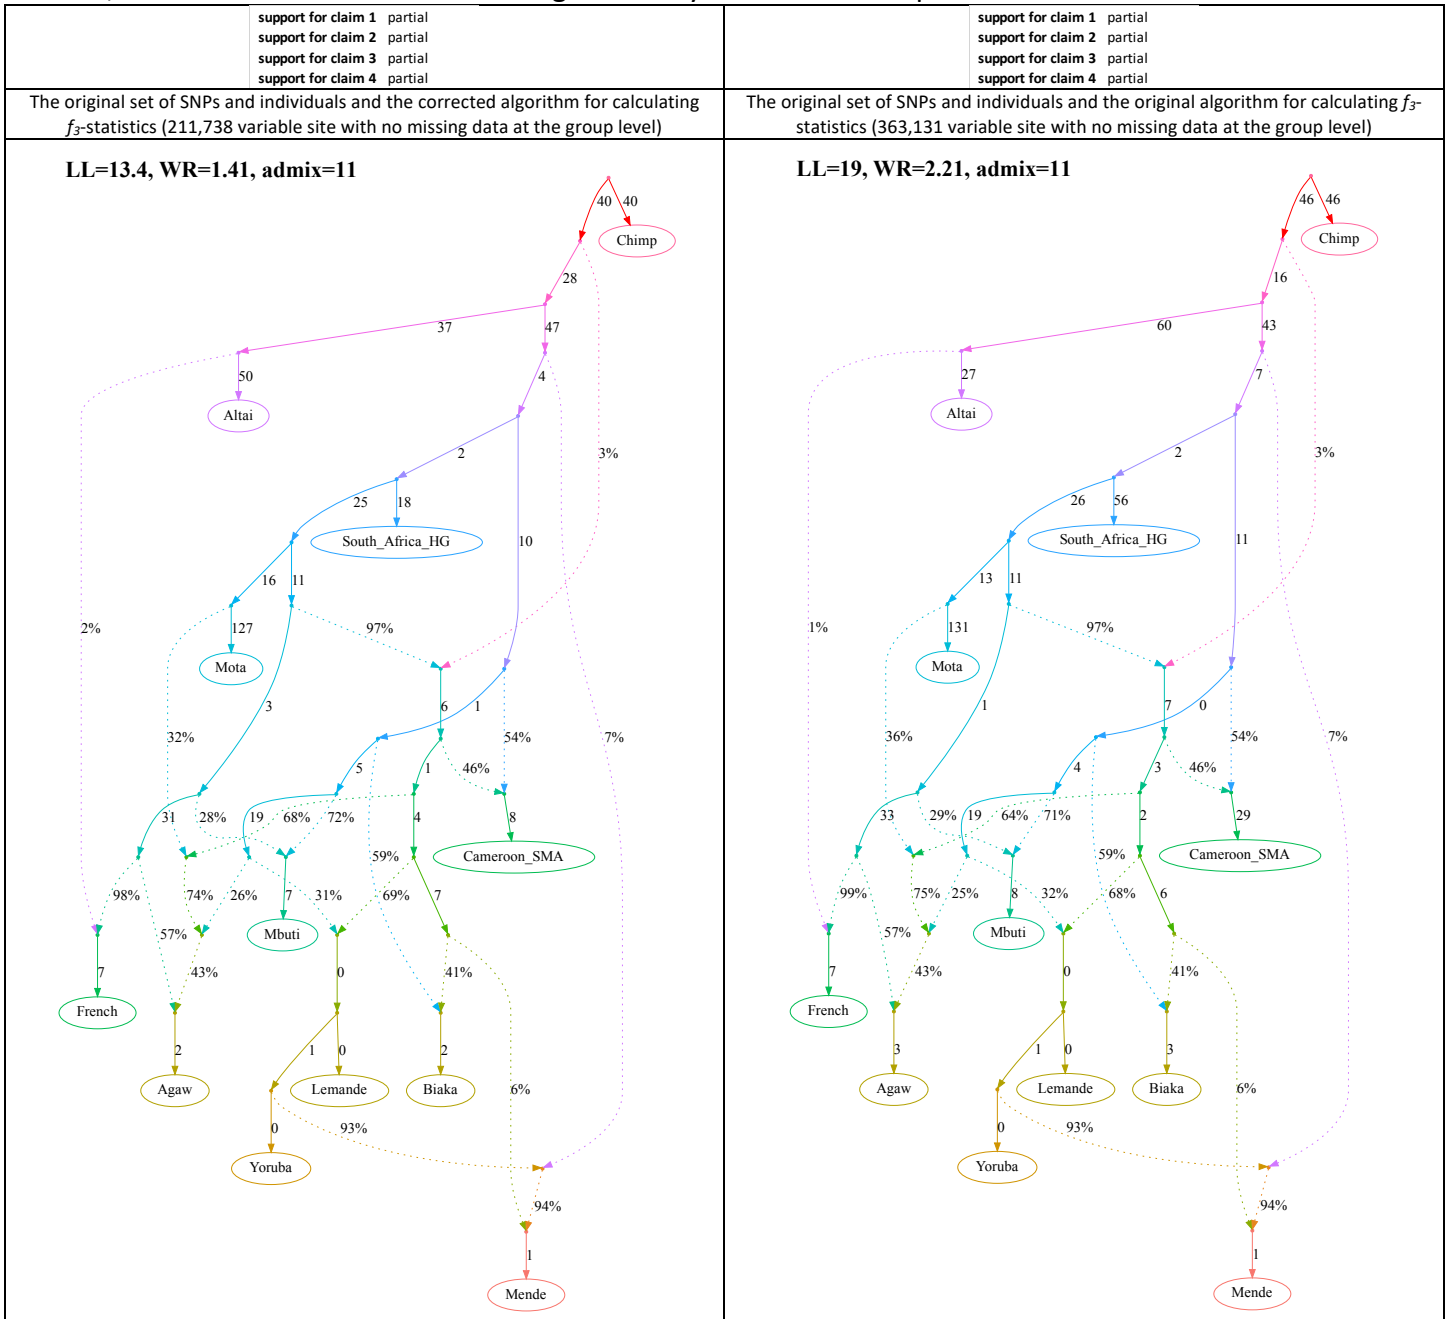

|                                                                                                                          |                                                                                                                          |
|--------------------------------------------------------------------------------------------------------------------------|--------------------------------------------------------------------------------------------------------------------------|
| support for claim 1 partial<br>support for claim 2 partial<br>support for claim 3 partial<br>support for claim 4 partial | support for claim 1 partial<br>support for claim 2 partial<br>support for claim 3 partial<br>support for claim 4 partial |
|--------------------------------------------------------------------------------------------------------------------------|--------------------------------------------------------------------------------------------------------------------------|

The original set of SNPs and individuals and the corrected algorithm for calculating  $f_3$ -statistics (211,738 variable site with no missing data at the group level)

The original set of SNPs and individuals and the original algorithm for calculating  $f_3$ -statistics (363,131 variable site with no missing data at the group level)

**LL=14.1, WR=1.69, admix=11**

**LL=22.8, WR=2.05, admix=11**

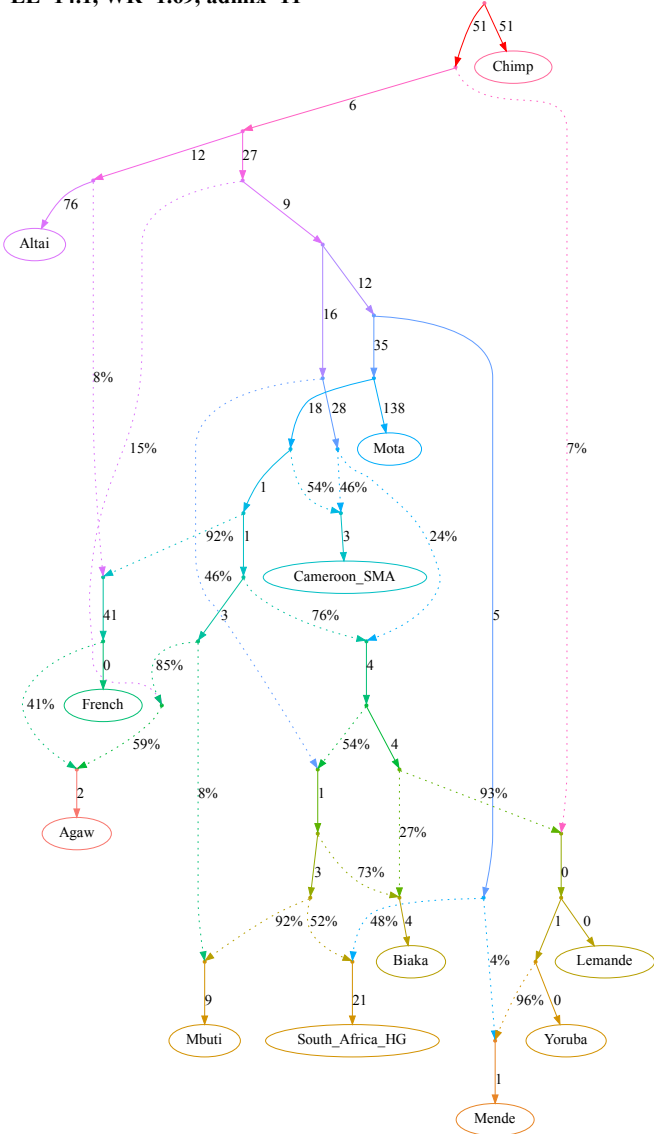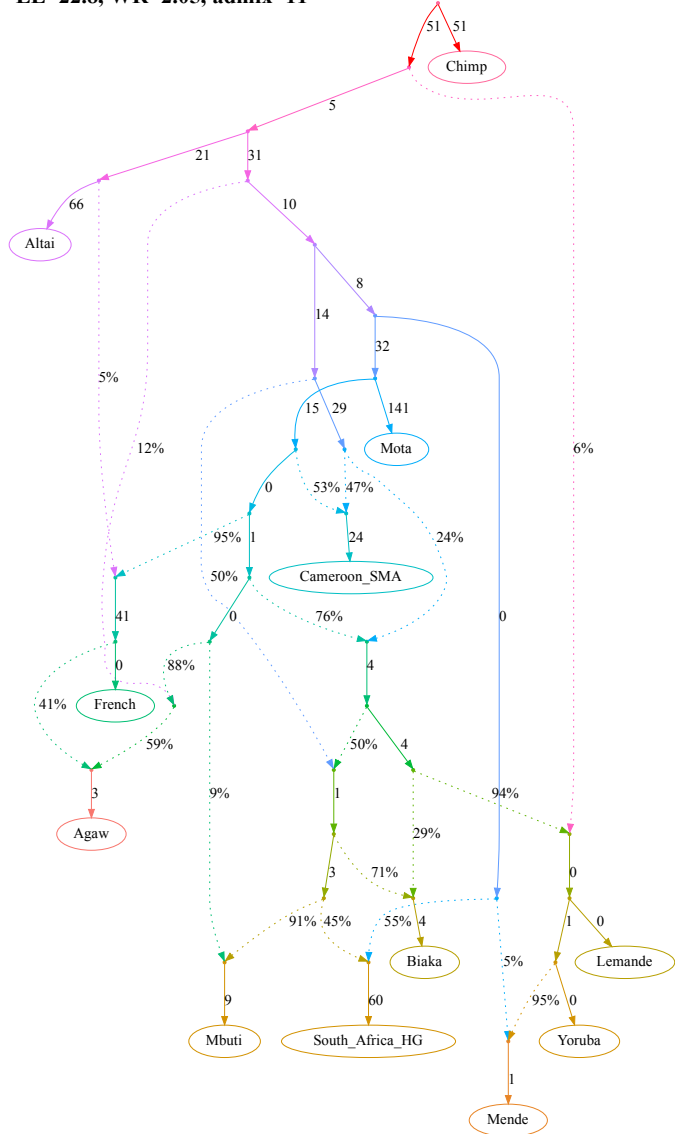

**m**, selected alternative models fitting nominally better than the published one

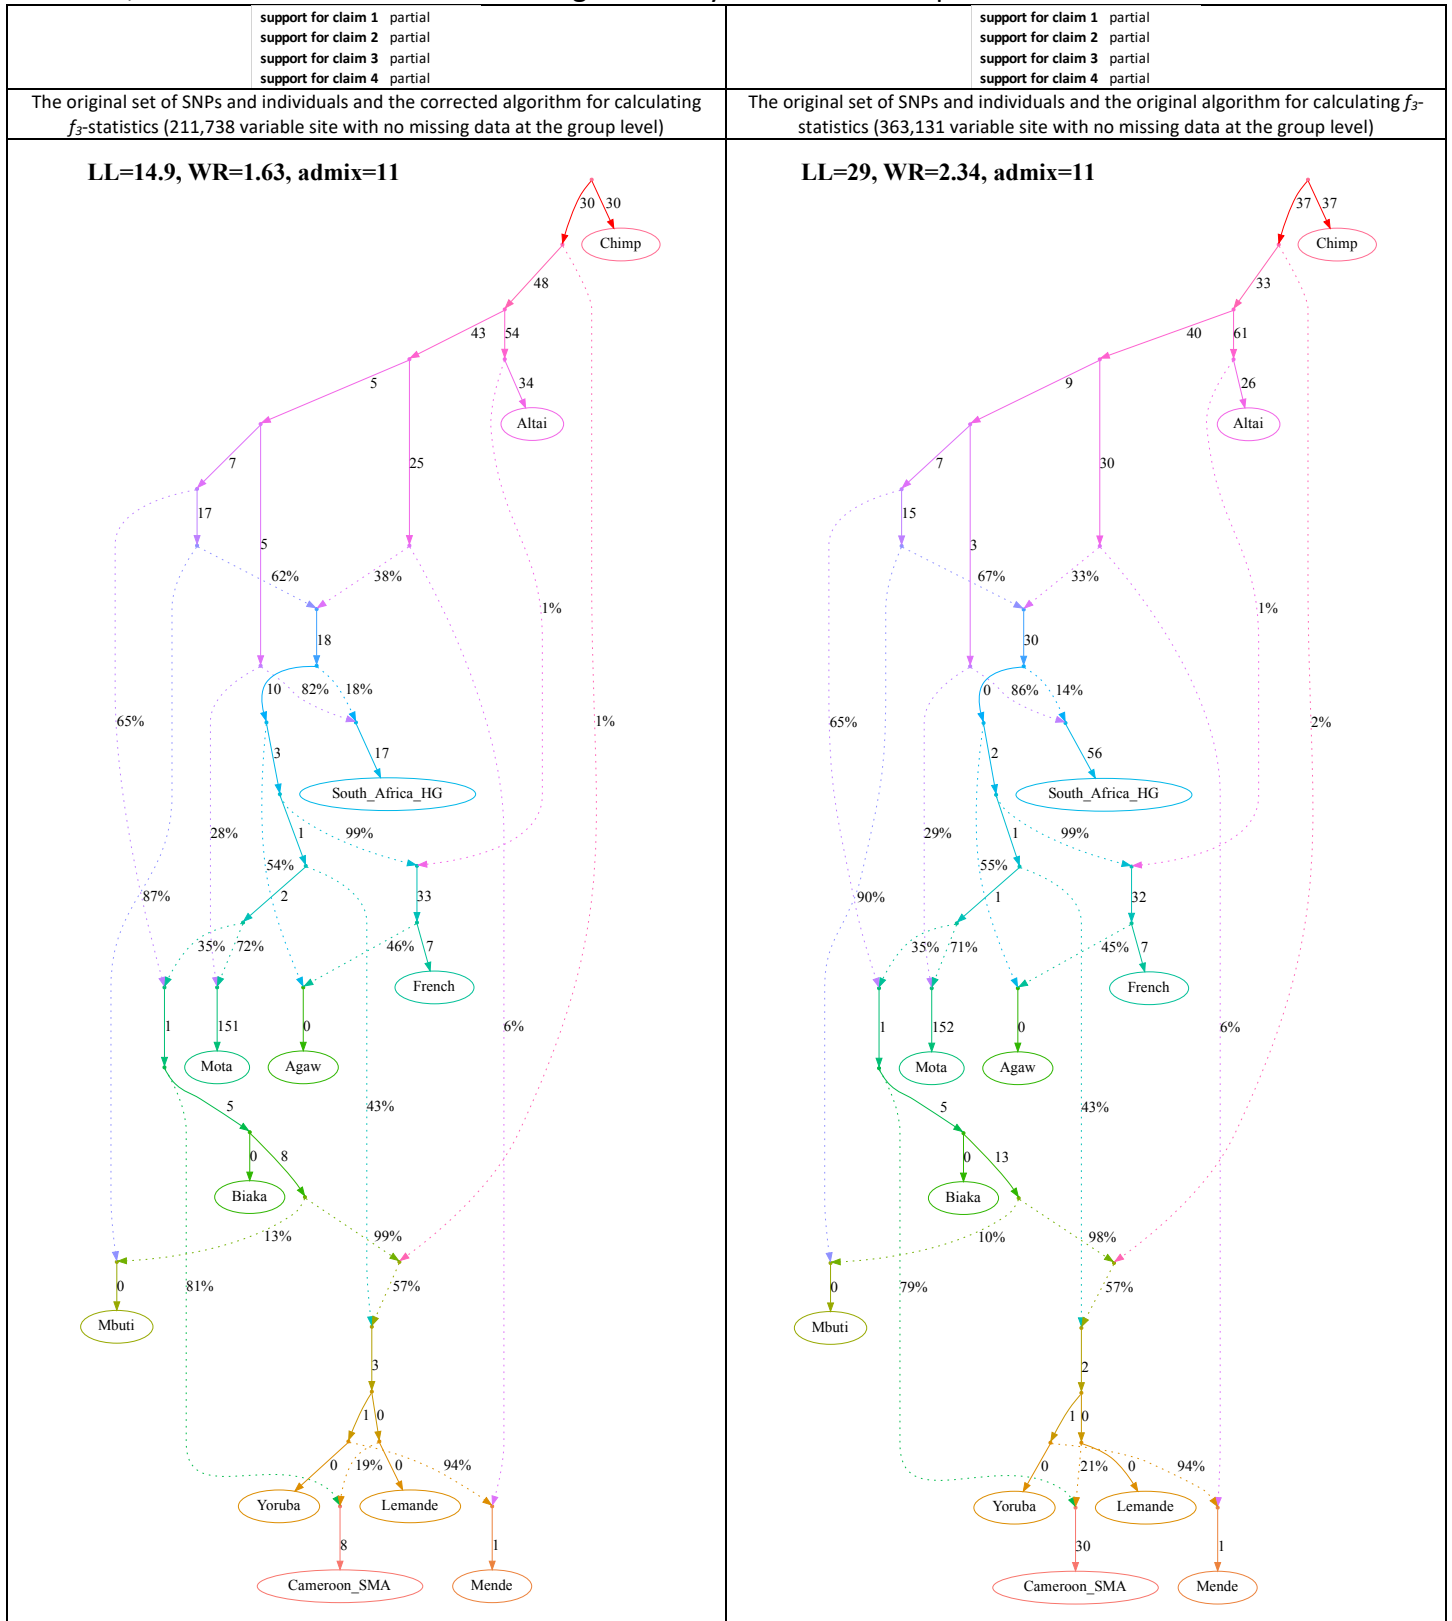

support for claim 1 partial  
 support for claim 2 partial  
 support for claim 3 partial  
 support for claim 4 partial

support for claim 1 partial  
 support for claim 2 partial  
 support for claim 3 partial  
 support for claim 4 partial

The original set of SNPs and individuals and the corrected algorithm for calculating  $f_3$ -statistics (211,738 variable site with no missing data at the group level)

The original set of SNPs and individuals and the original algorithm for calculating  $f_3$ -statistics (363,131 variable site with no missing data at the group level)

LL=15.6, WR=1.66, admix=11

LL=24.5, WR=2.61, admix=11

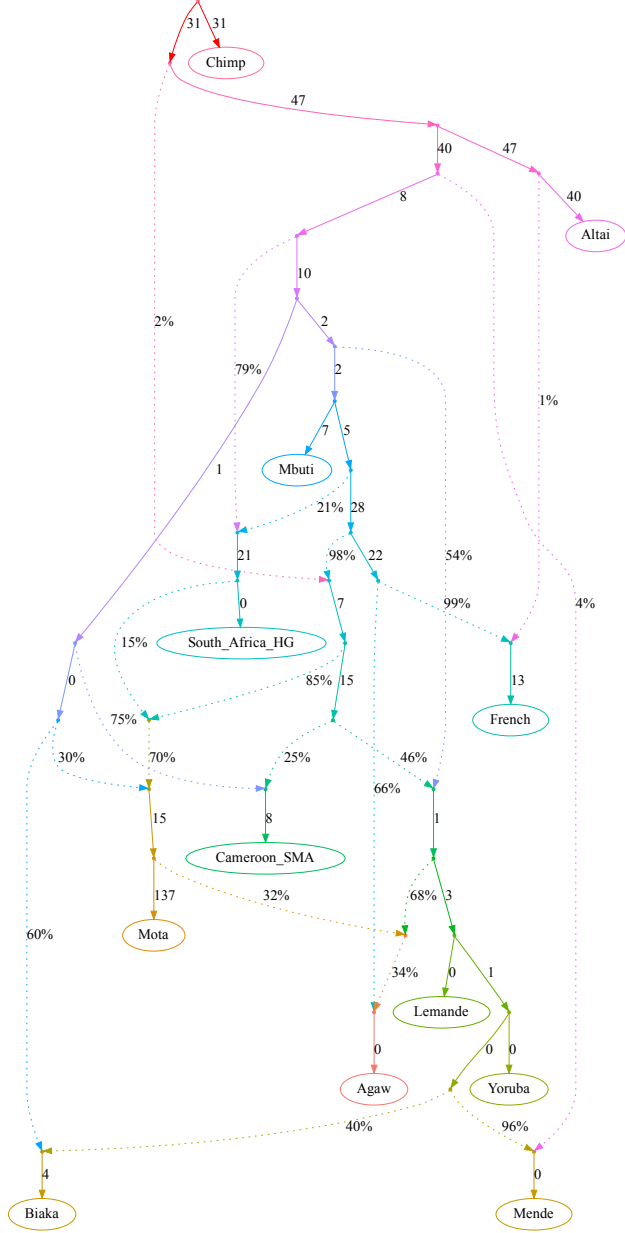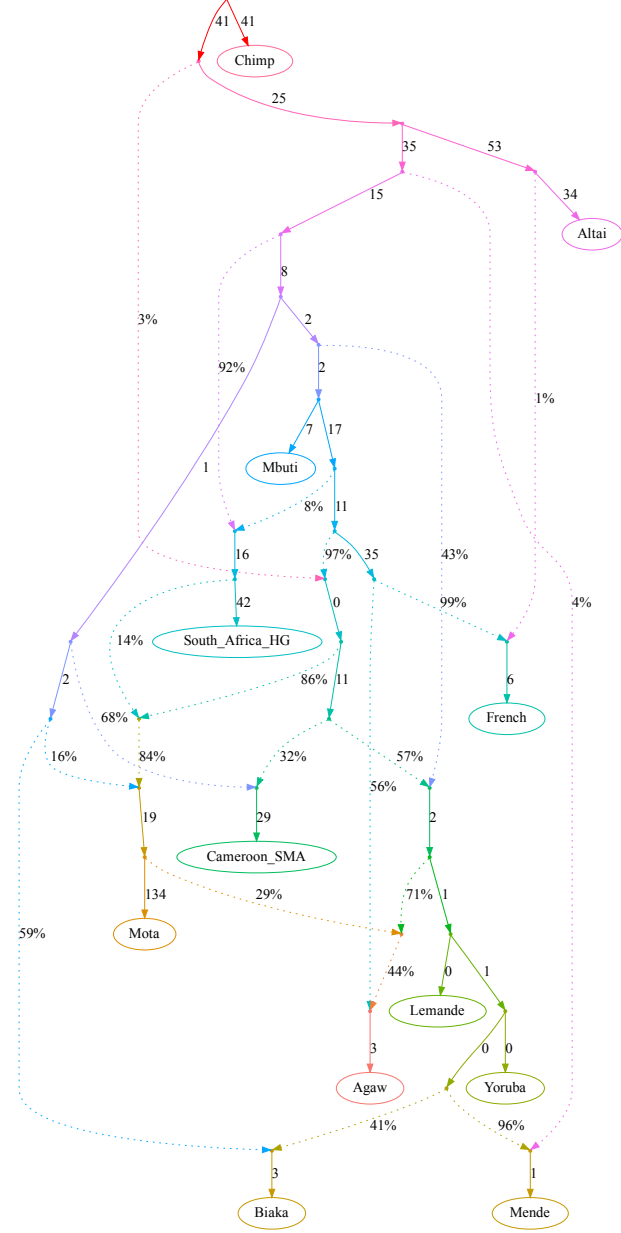



n, selected alternative models fitting nominally better than the published one

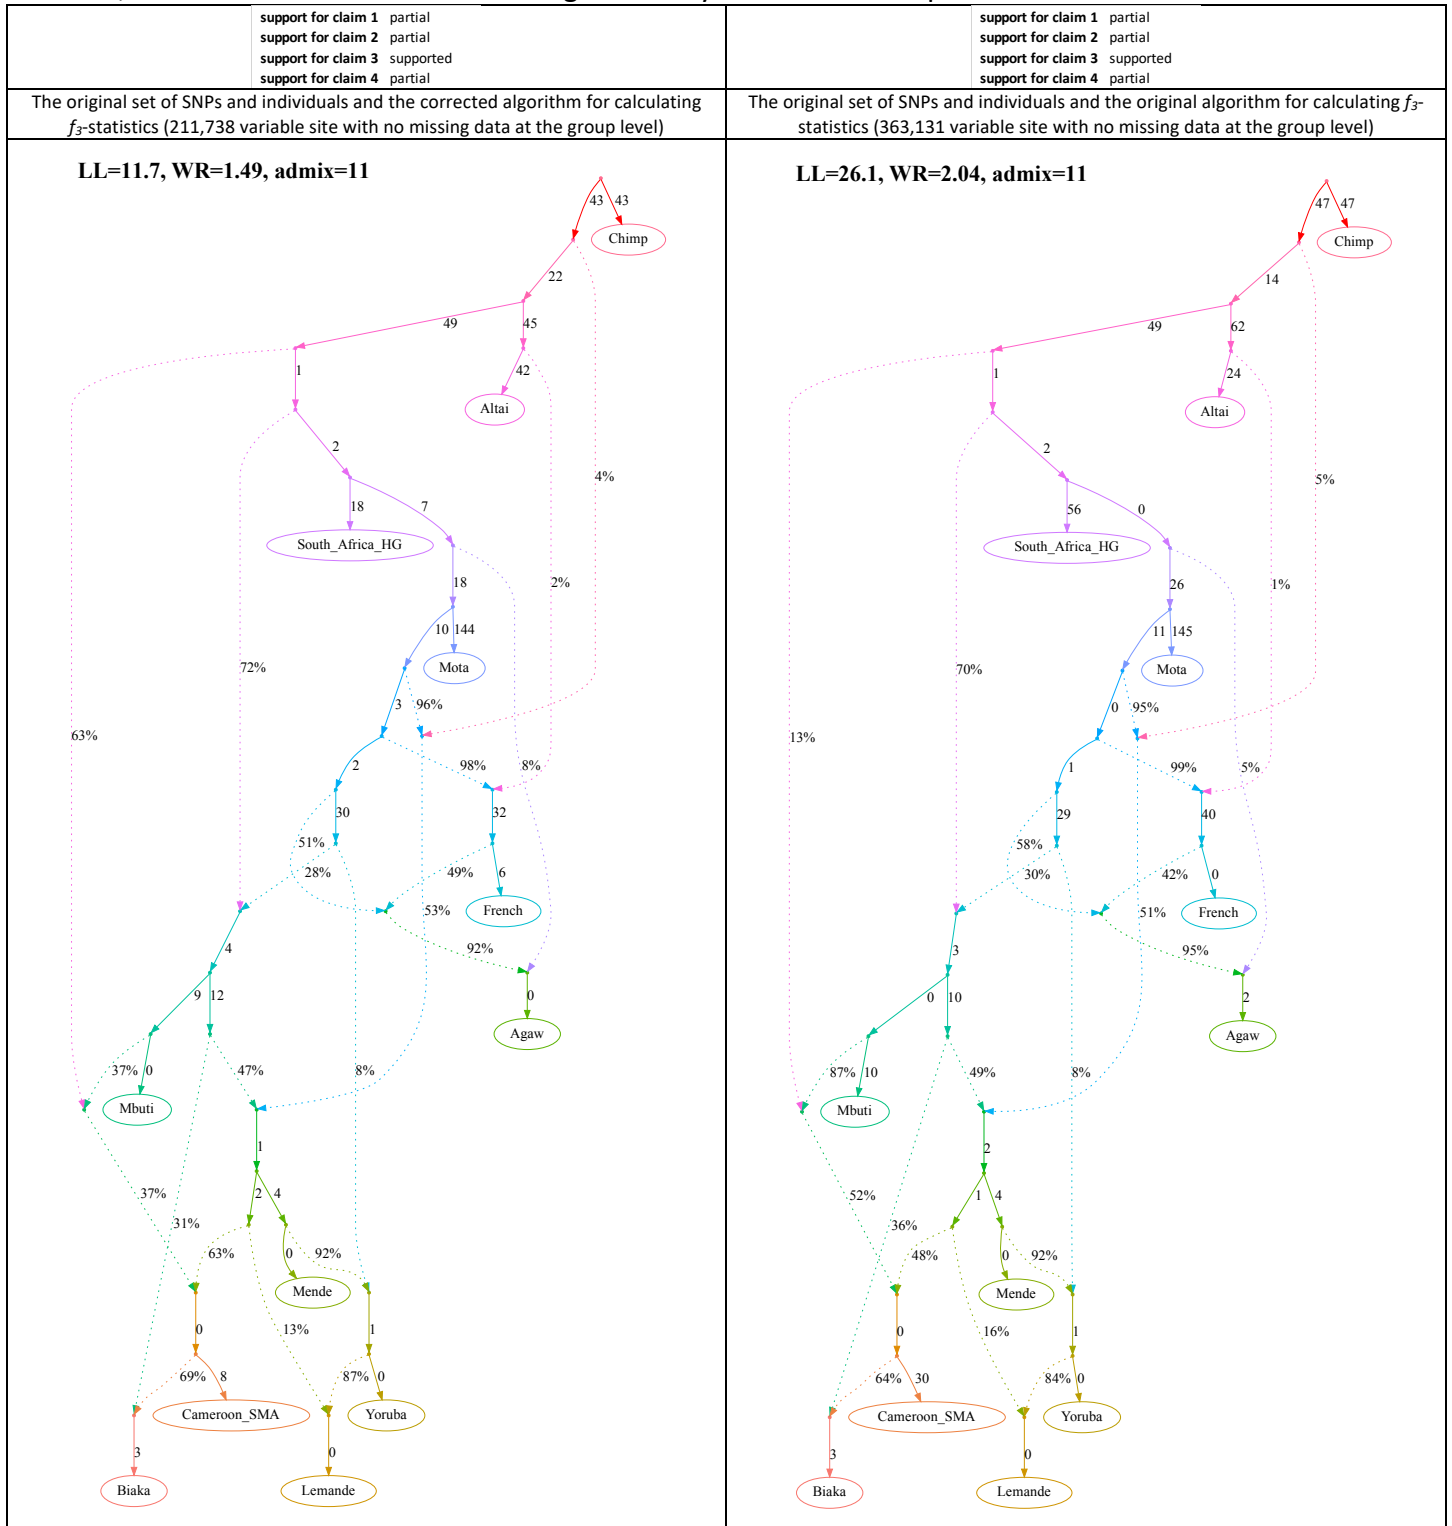

support for claim 1 supported  
 support for claim 2 partial  
 support for claim 3 partial  
 support for claim 4 partial

support for claim 1 supported  
 support for claim 2 partial  
 support for claim 3 partial  
 support for claim 4 partial

The original set of SNPs and individuals and the corrected algorithm for calculating  $f_3$ -statistics (211,738 variable site with no missing data at the group level)

The original set of SNPs and individuals and the original algorithm for calculating  $f_3$ -statistics (363,131 variable site with no missing data at the group level)

**LL=14.4, WR=1.61, admix=11**

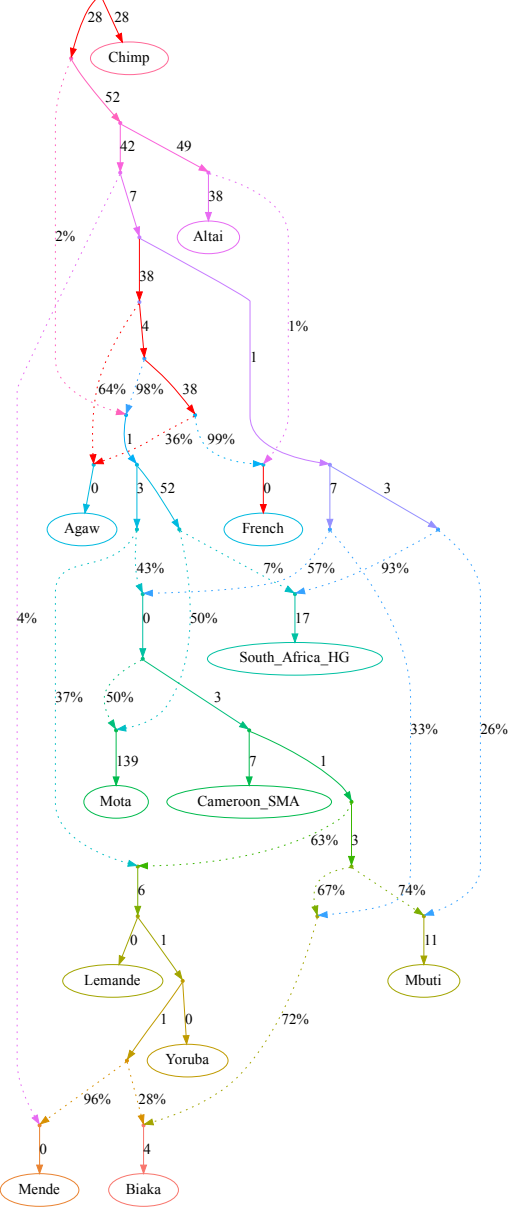

**LL=24.1, WR=2.28, admix=11**

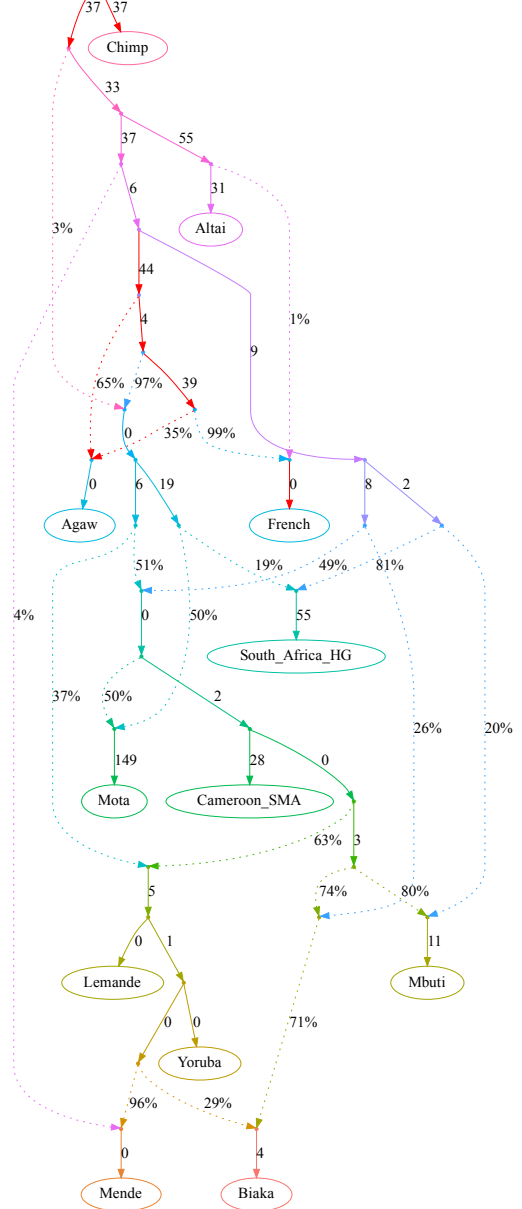

**o**, selected alternative models fitting nominally better than the published one

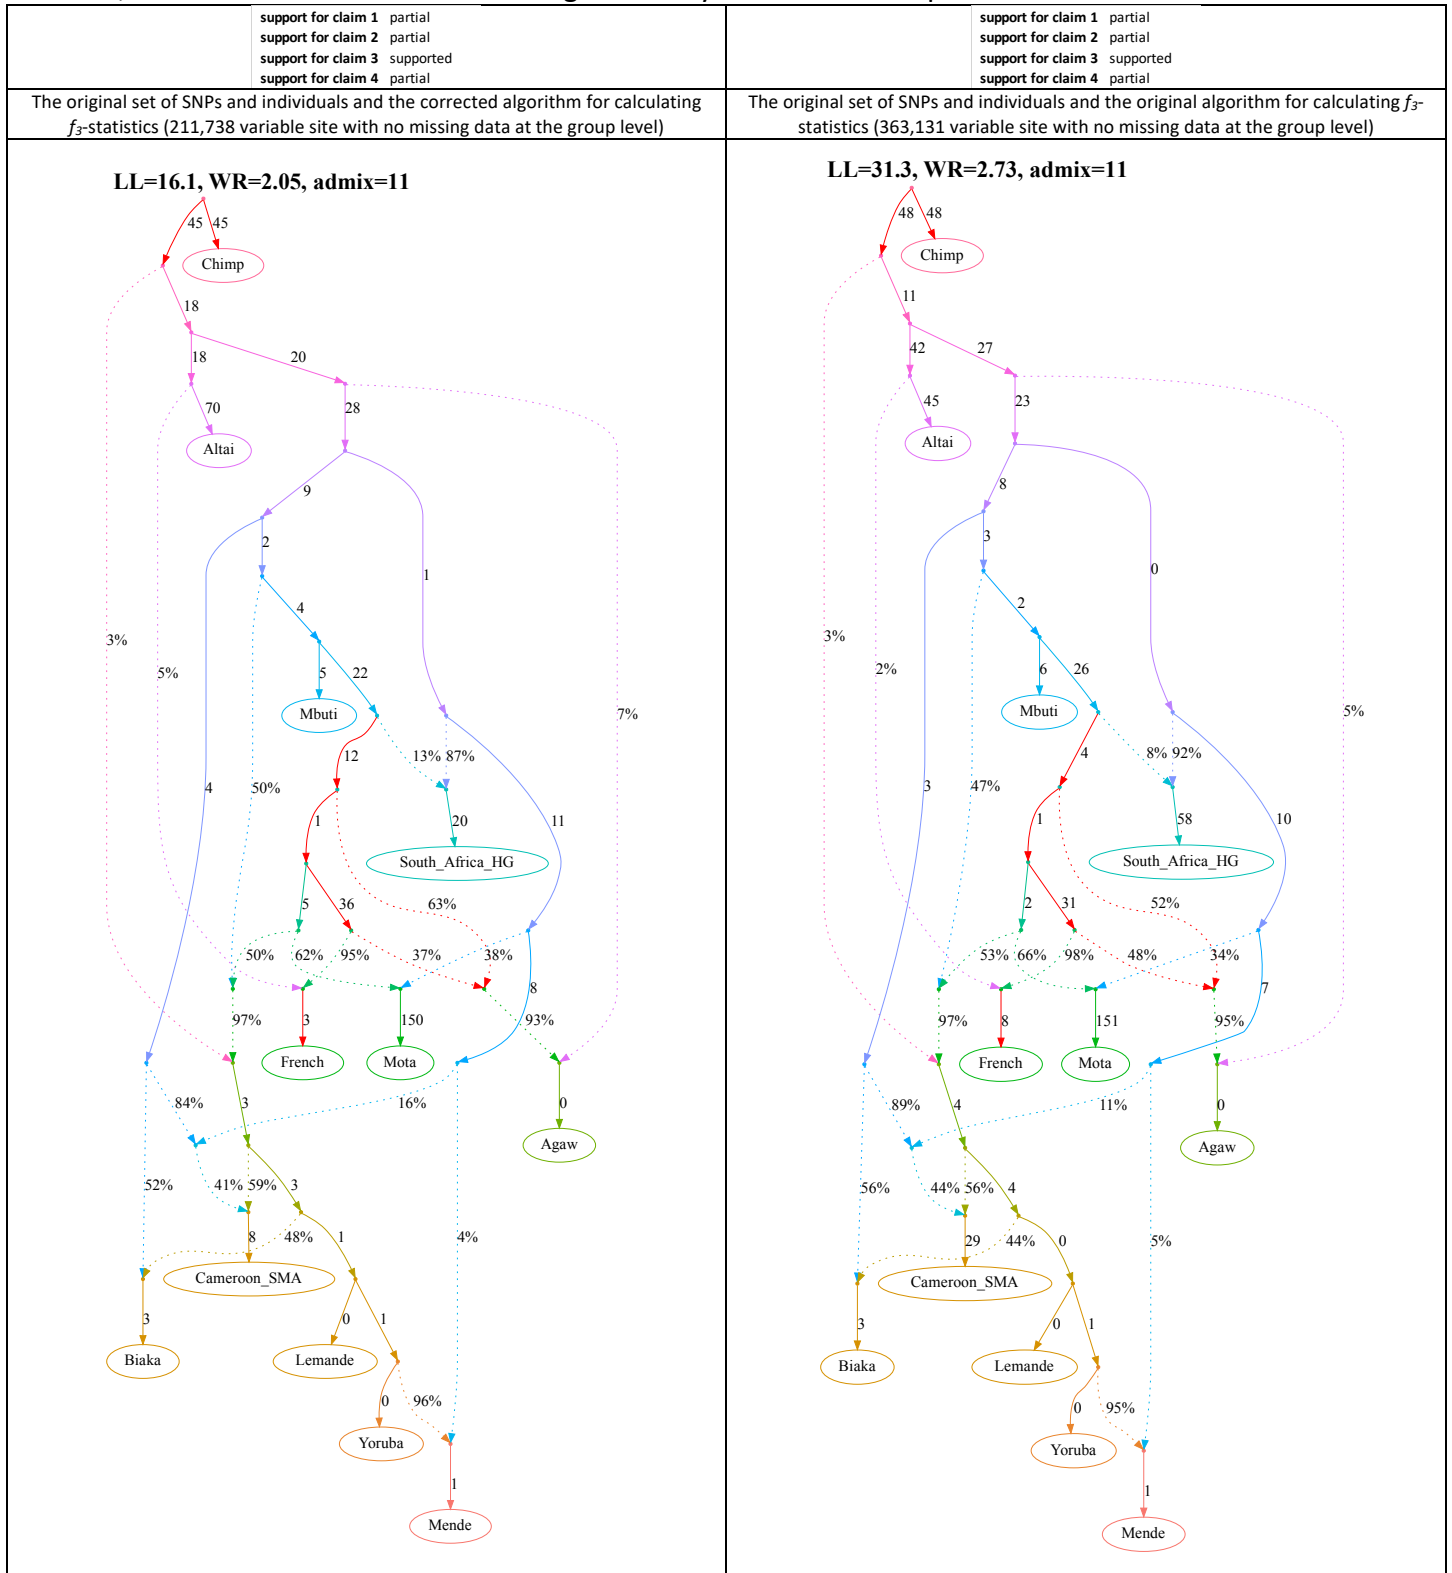

support for claim 1 supported  
 support for claim 2 partial  
 support for claim 3 supported  
 support for claim 4 partial

support for claim 1 supported  
 support for claim 2 partial  
 support for claim 3 supported  
 support for claim 4 partial

The original set of SNPs and individuals and the corrected algorithm for calculating  $f_3$ -statistics (211,738 variable site with no missing data at the group level)

The original set of SNPs and individuals and the original algorithm for calculating  $f_3$ -statistics (363,131 variable site with no missing data at the group level)

LL=15, WR=1.77, admix=11

LL=29, WR=2.19, admix=11

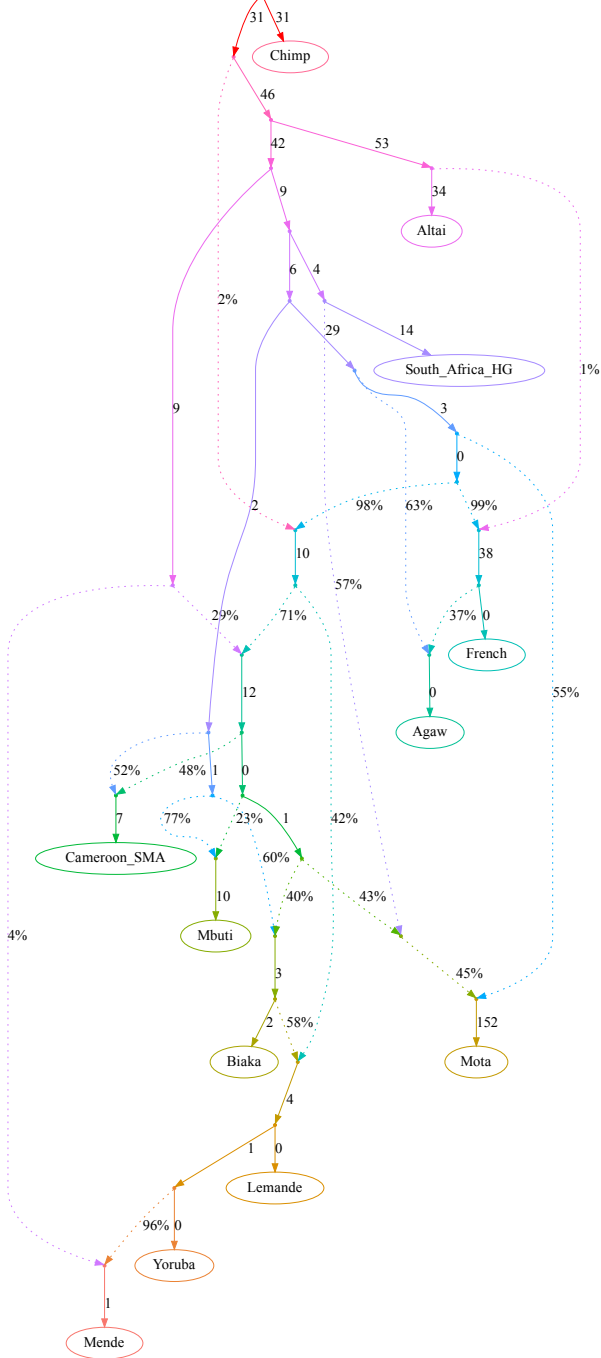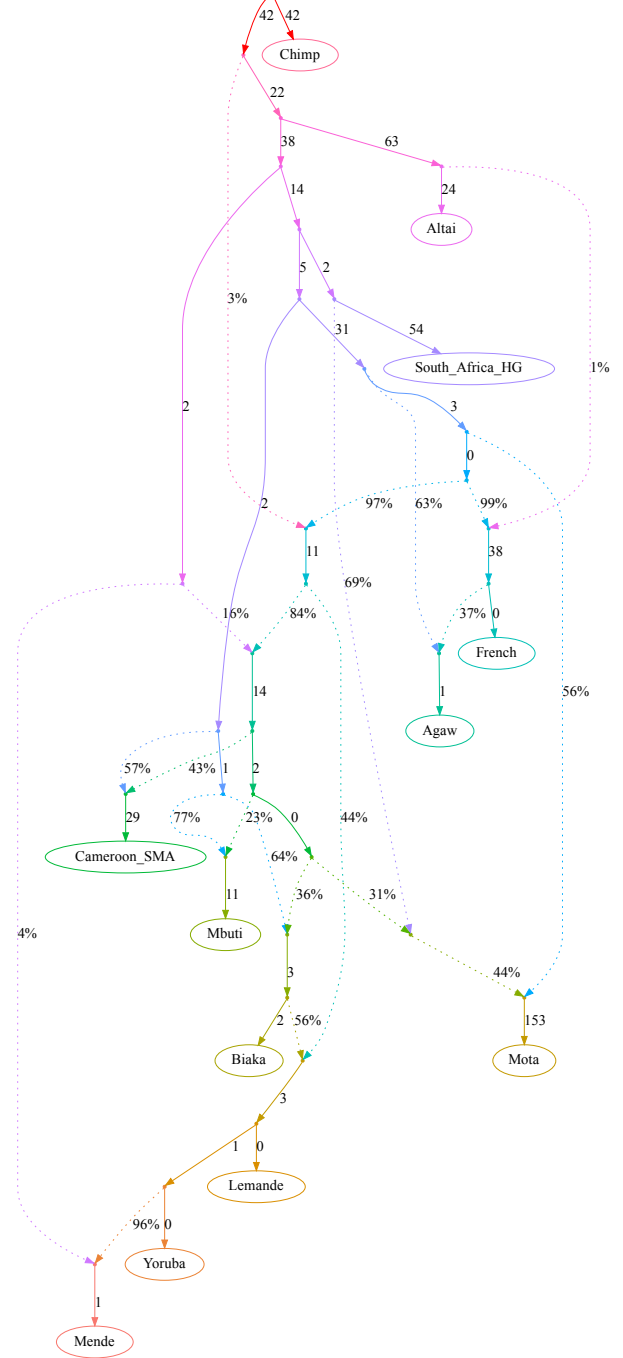

**p**, selected alternative models fitting nominally better than the published one

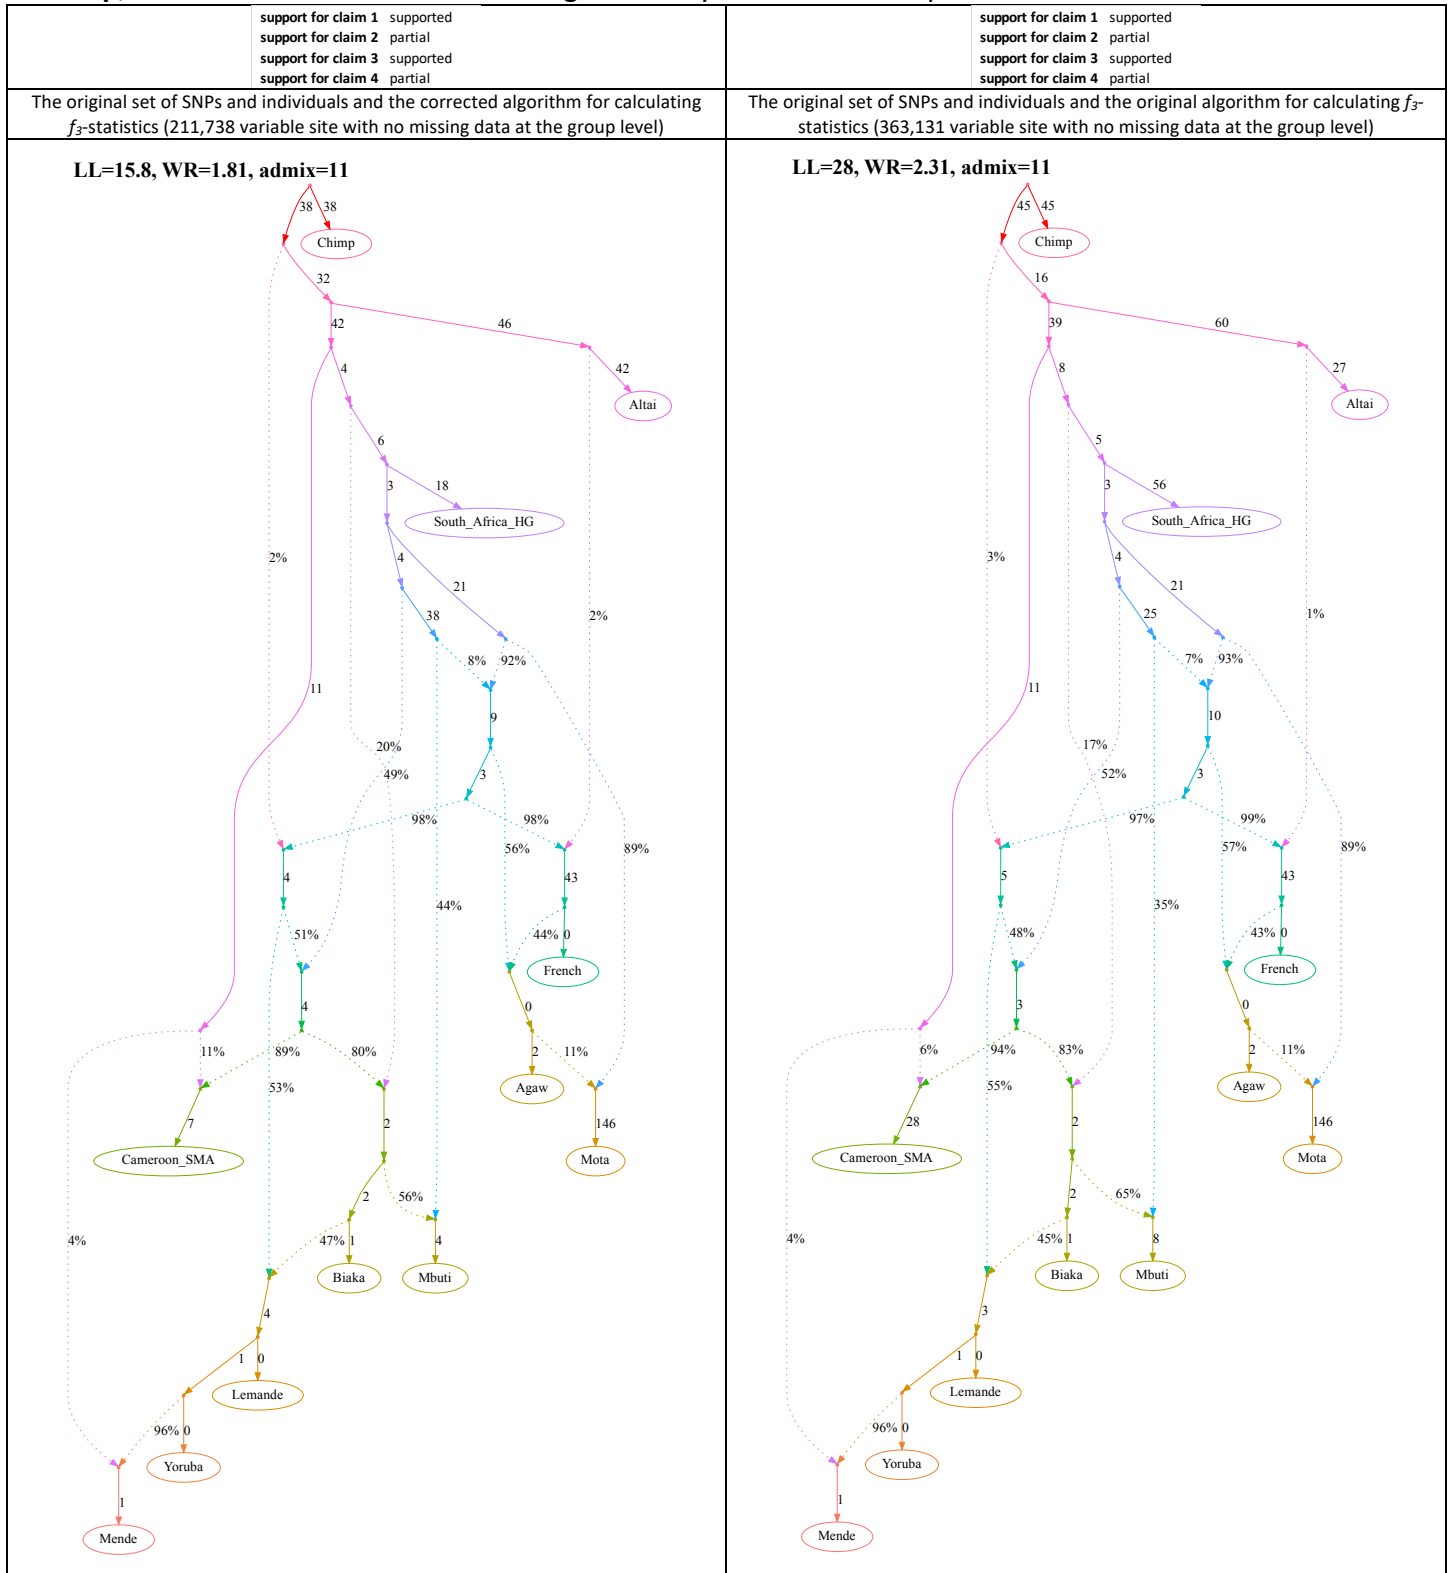

|                                                                                                                              |                                                                                                                              |
|------------------------------------------------------------------------------------------------------------------------------|------------------------------------------------------------------------------------------------------------------------------|
| support for claim 1 supported<br>support for claim 2 partial<br>support for claim 3 supported<br>support for claim 4 partial | support for claim 1 supported<br>support for claim 2 partial<br>support for claim 3 supported<br>support for claim 4 partial |
|------------------------------------------------------------------------------------------------------------------------------|------------------------------------------------------------------------------------------------------------------------------|

The original set of SNPs and individuals and the corrected algorithm for calculating  $f_3$ -statistics (211,738 variable site with no missing data at the group level)

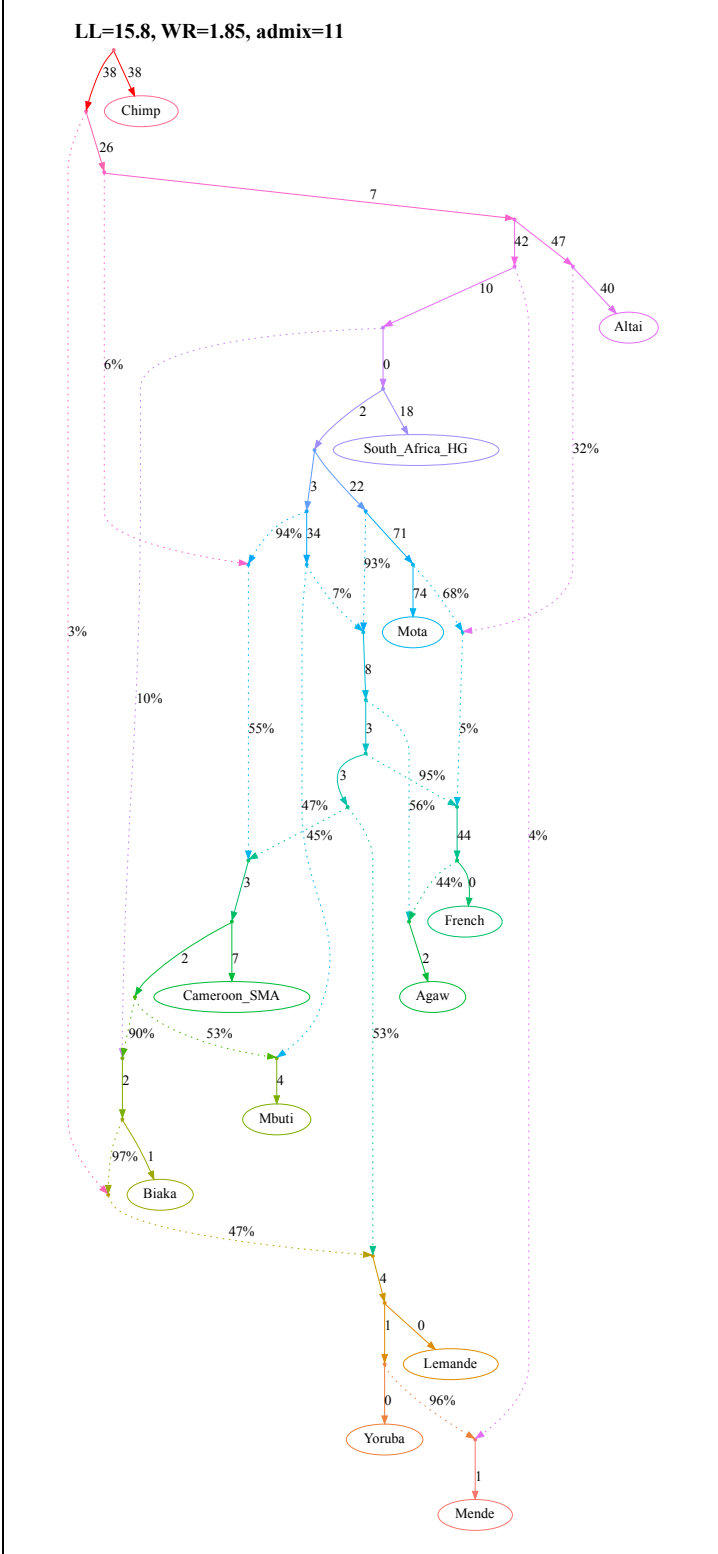

The original set of SNPs and individuals and the original algorithm for calculating  $f_3$ -statistics (363,131 variable site with no missing data at the group level)

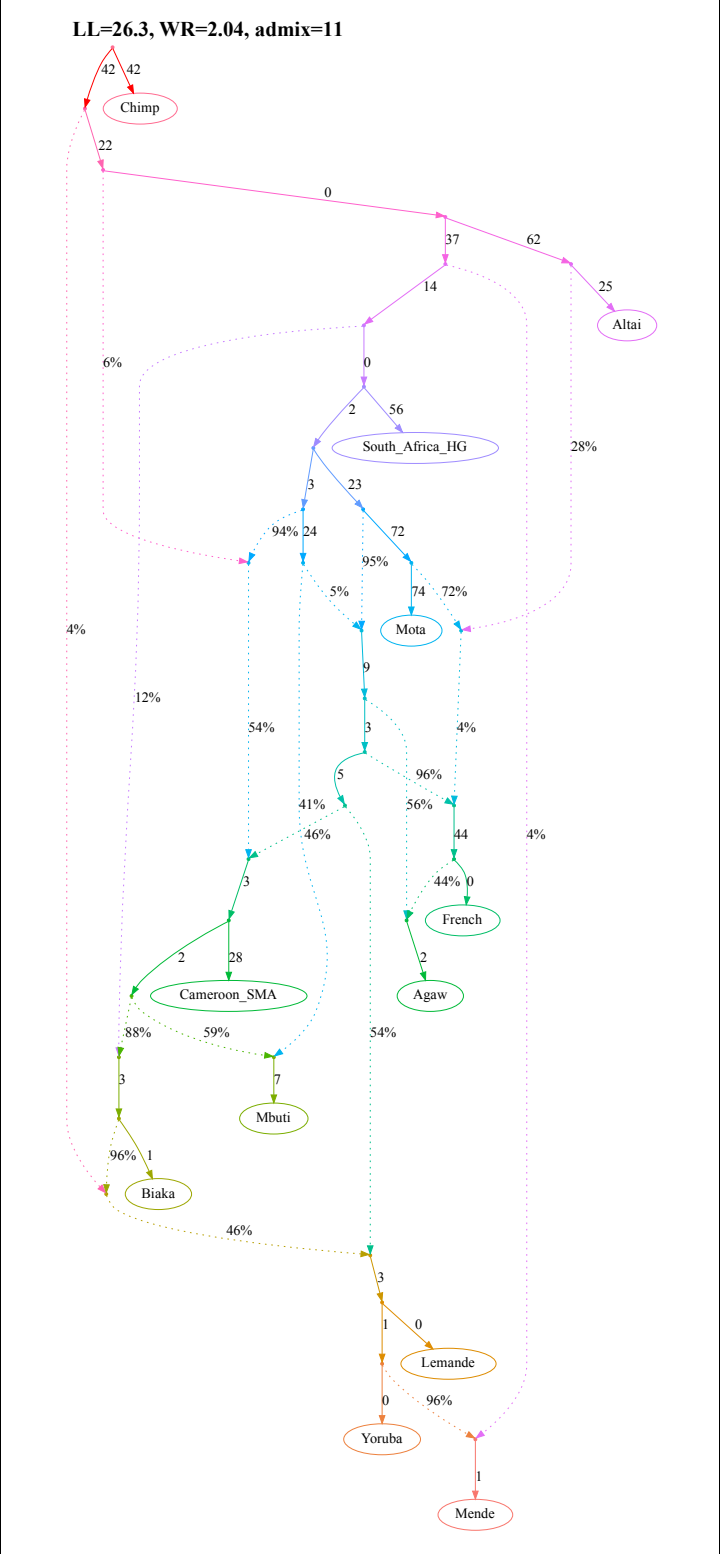

**q**, selected alternative models fitting nominally better than the published one

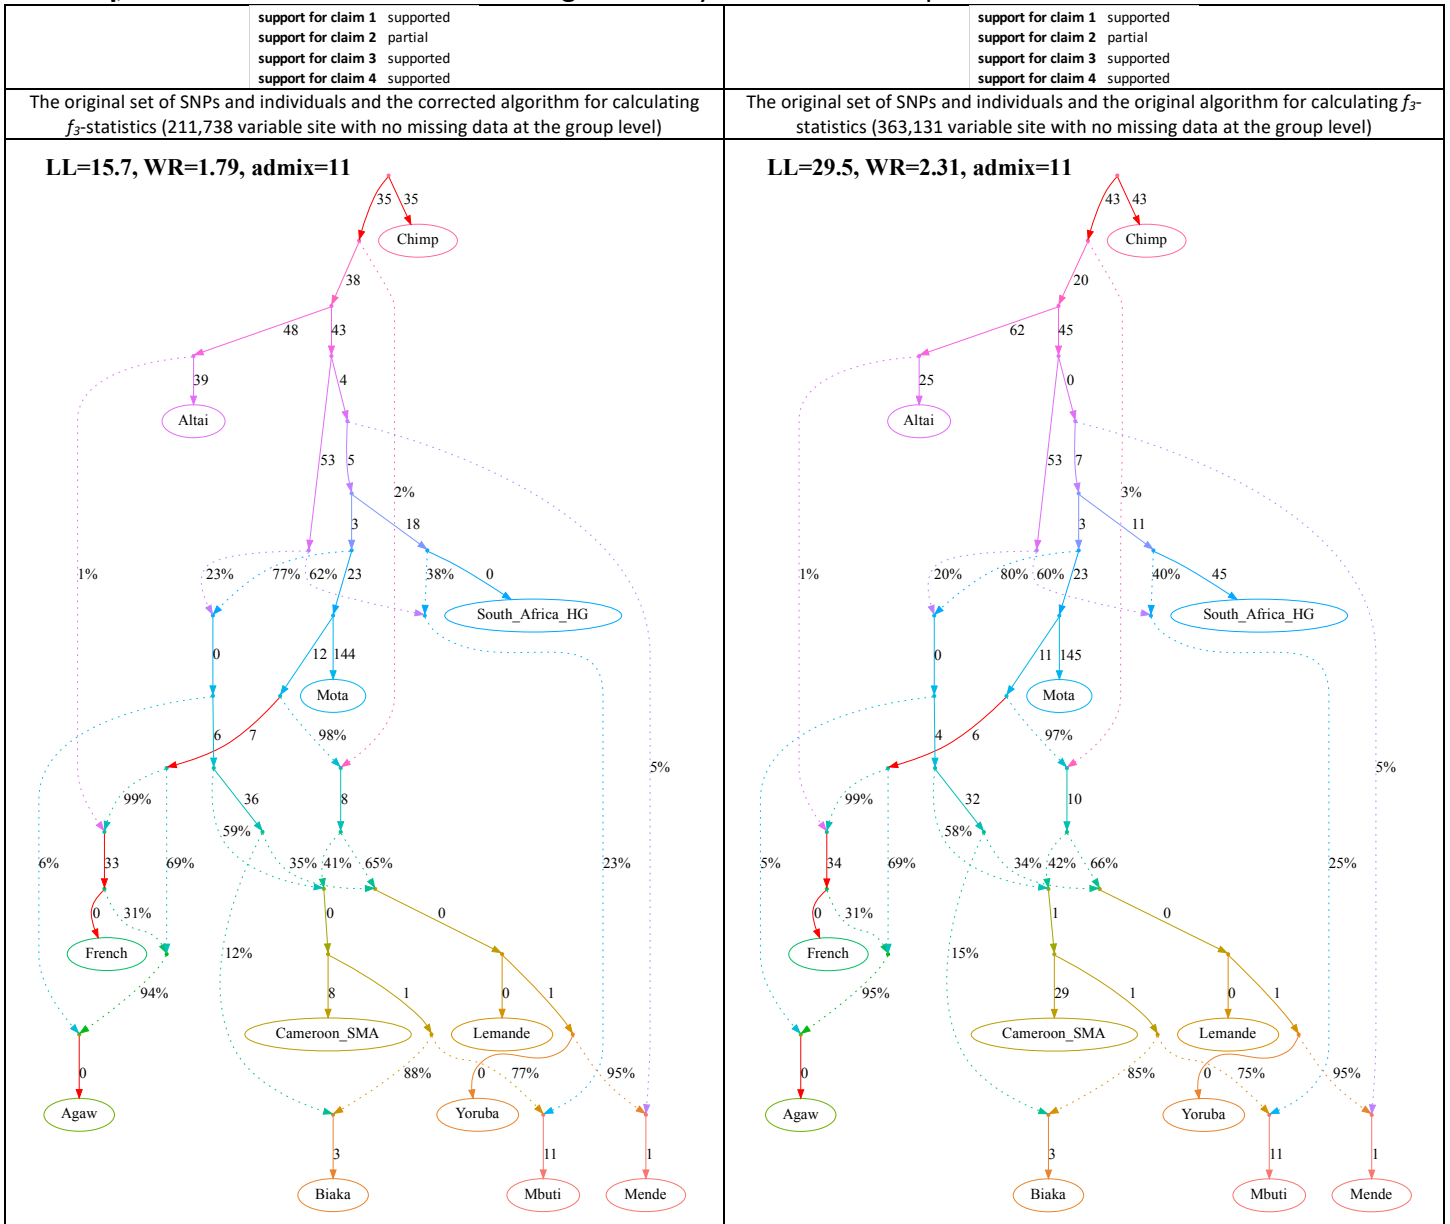

support for claim 1 supported  
 support for claim 2 supported  
 support for claim 3 supported  
 support for claim 4 supported

support for claim 1 supported  
 support for claim 2 supported  
 support for claim 3 supported  
 support for claim 4 supported

The original set of SNPs and individuals and the corrected algorithm for calculating  $f_3$ -statistics (211,738 variable site with no missing data at the group level)

The original set of SNPs and individuals and the original algorithm for calculating  $f_3$ -statistics (363,131 variable site with no missing data at the group level)

LL=15.5, WR=1.93, admix=11

LL=30.8, WR=2.58, admix=11

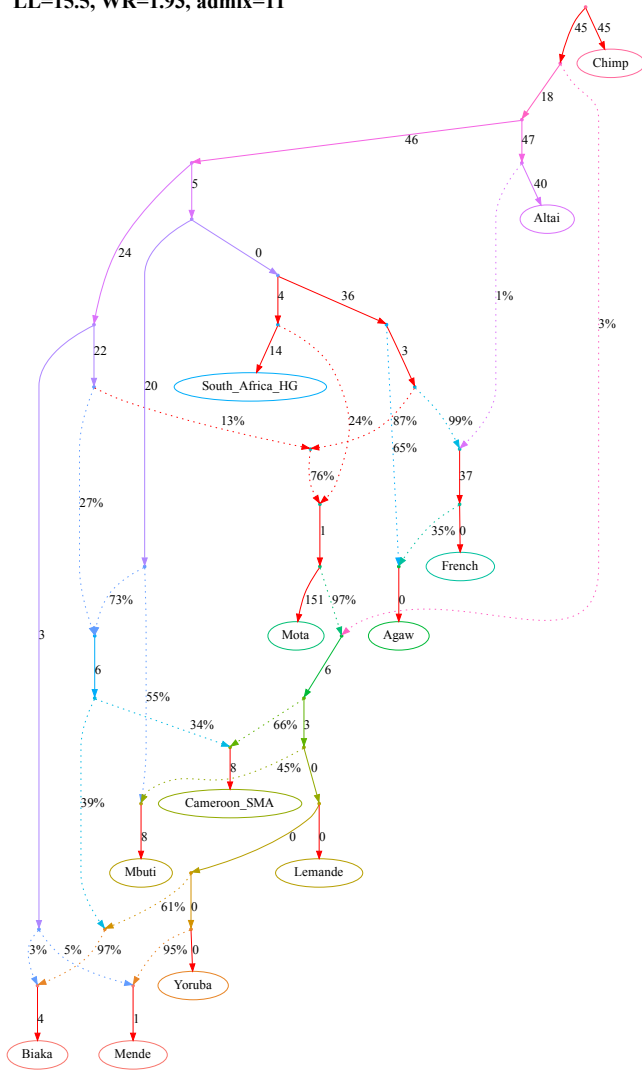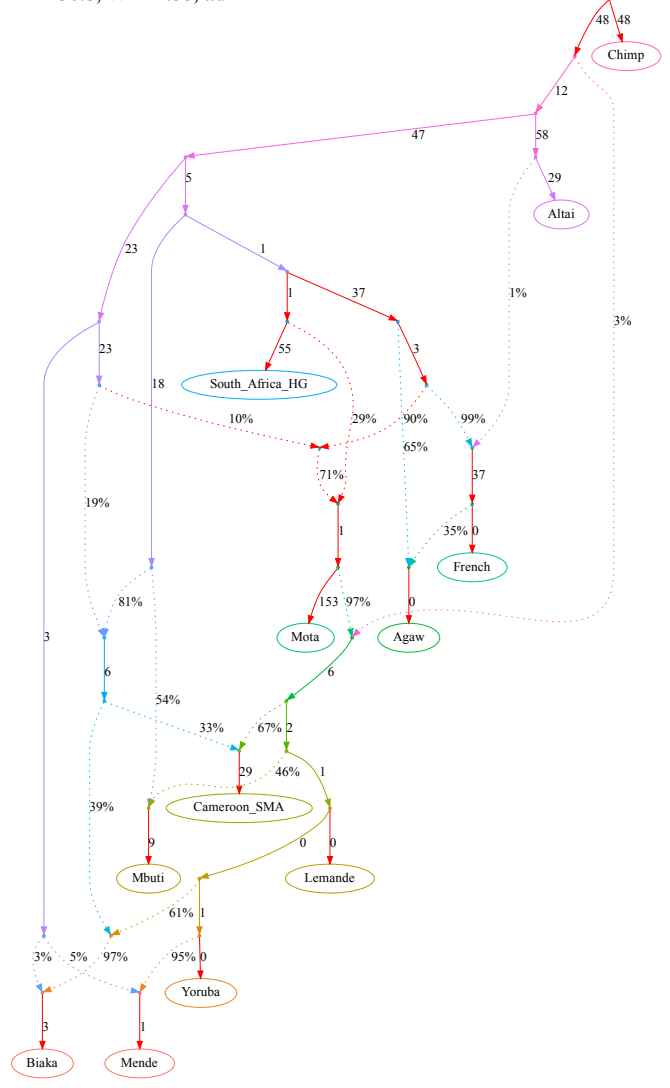

Supplement: fig4-data1 [file elife-85492-fig4-data1-v2.pdf]
