# Supplementary material for: On the limits of fitting complex models of population history to f-statistics
Source: eLife journal article supplement (doi:10.7554/elife.85492), 2023-04-14

**Figure 4–source data 2.** Published admixture graph from Wang *et al.* (2021) and alternative graphs found with *findGraphs* (12 populations, 8 admixture events) using the updated algorithm for calculating  $f_3$ -statistics. The graphs were also re-fitted using the original algorithm for calculating  $f_3$ -statistics. Model parameters (graph edges) that were inferred to be unidentifiable are plotted in red.

**a, published model**

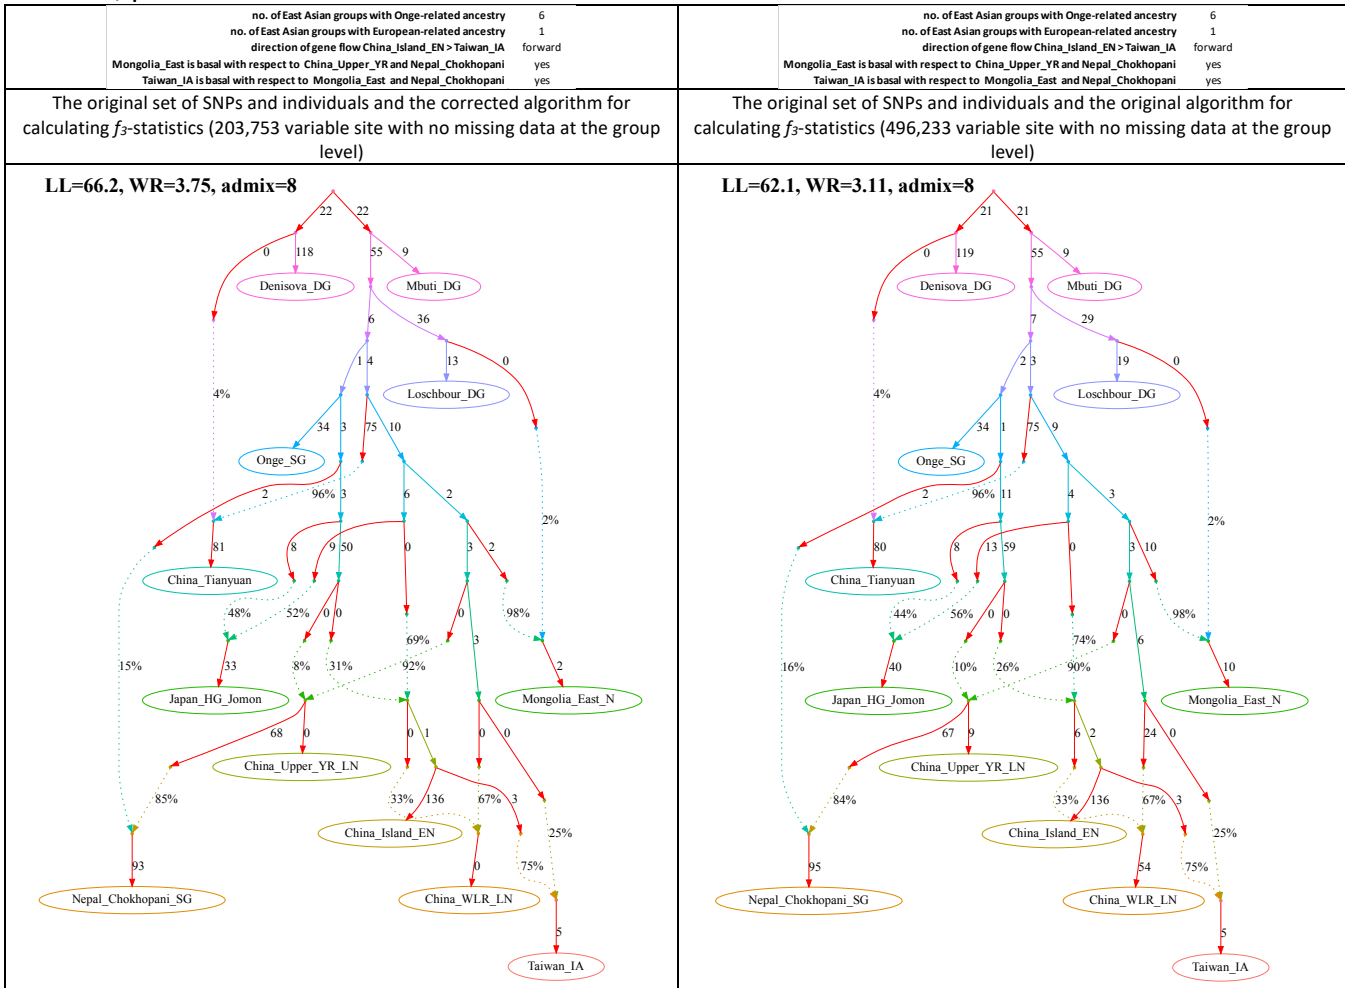

**b, published model, simplified**

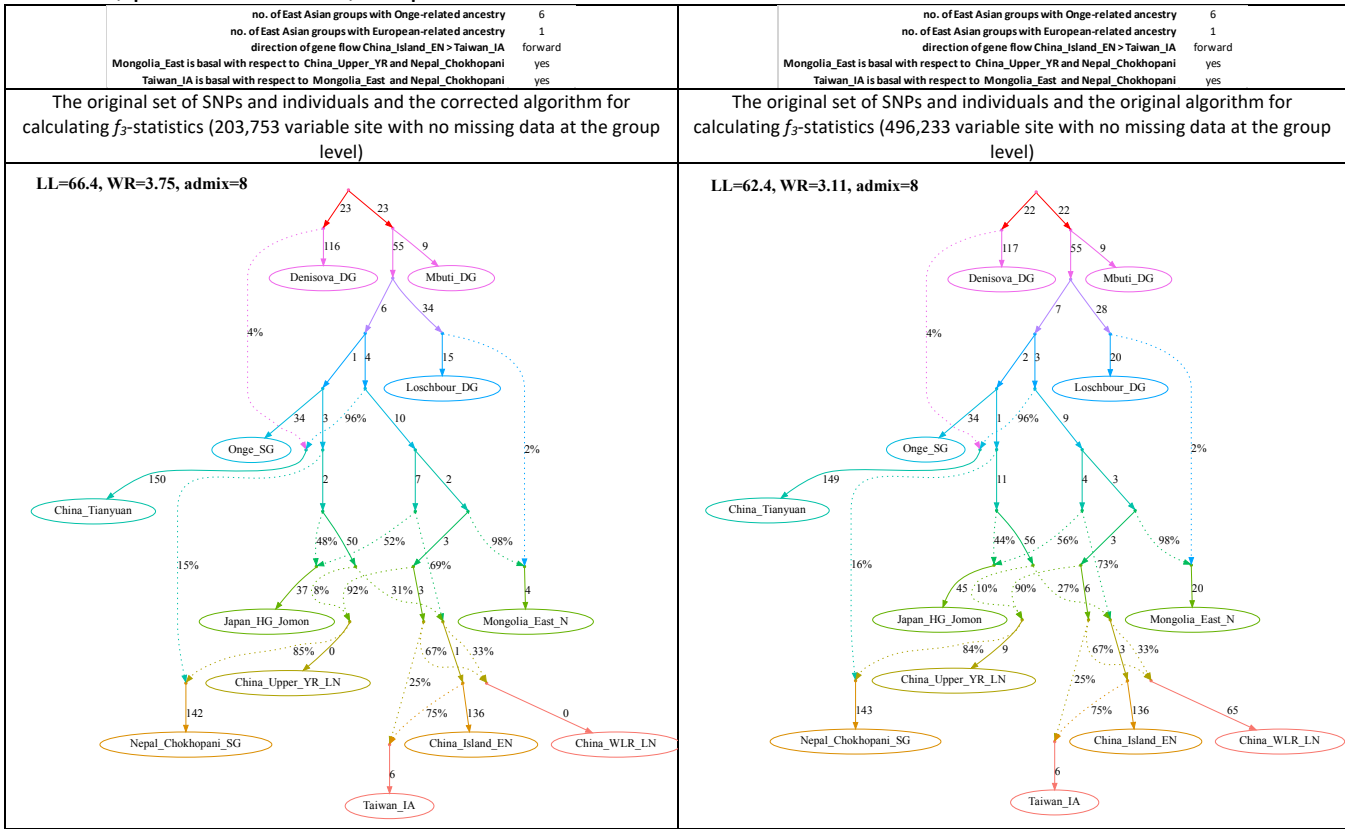

A claim by Wang *et al.* 2021 relying on the admixture graph:

There is Onge-related admixture in the following lineages: Jomon (Japan\_HG\_Jomon), Tibetan (Nepal\_Chokhopani\_SG), Upper Yellow River Late Neolithic (China\_Upper\_YR\_LN), West Liao River Late Neolithic (China\_WLR\_LN), Taiwan Iron Age (Taiwan\_IA), China Island Early Neolithic (Liangdao, China\_Island\_EN).

**c, alternative models fitting significantly better than the published one**

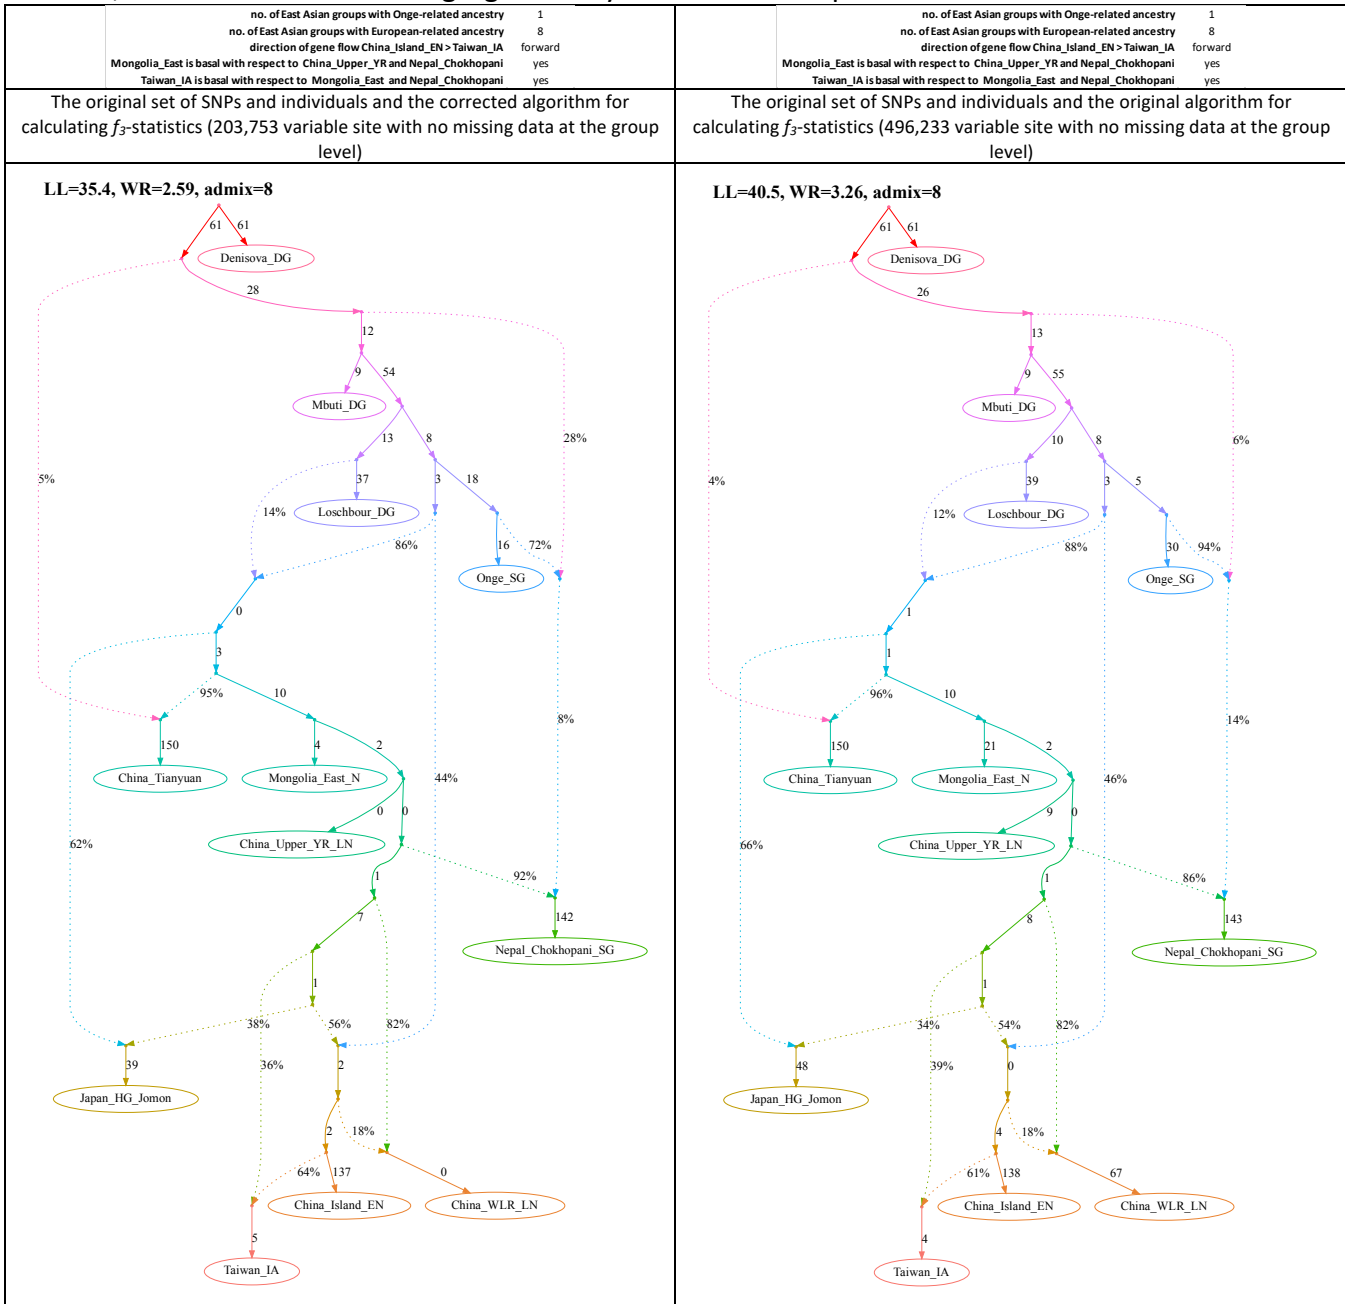

no. of East Asian groups with Onge-related ancestry 2  
 no. of East Asian groups with European-related ancestry 8  
 direction of gene flow China\_Island\_EN > Taiwan\_IA forward  
 Mongolia\_East is basal with respect to China\_Upper\_YR and Nepal\_Chokhopani yes  
 Taiwan\_IA is basal with respect to Mongolia\_East and Nepal\_Chokhopani yes

The original set of SNPs and individuals and the corrected algorithm for calculating  $f_3$ -statistics (203,753 variable site with no missing data at the group level)

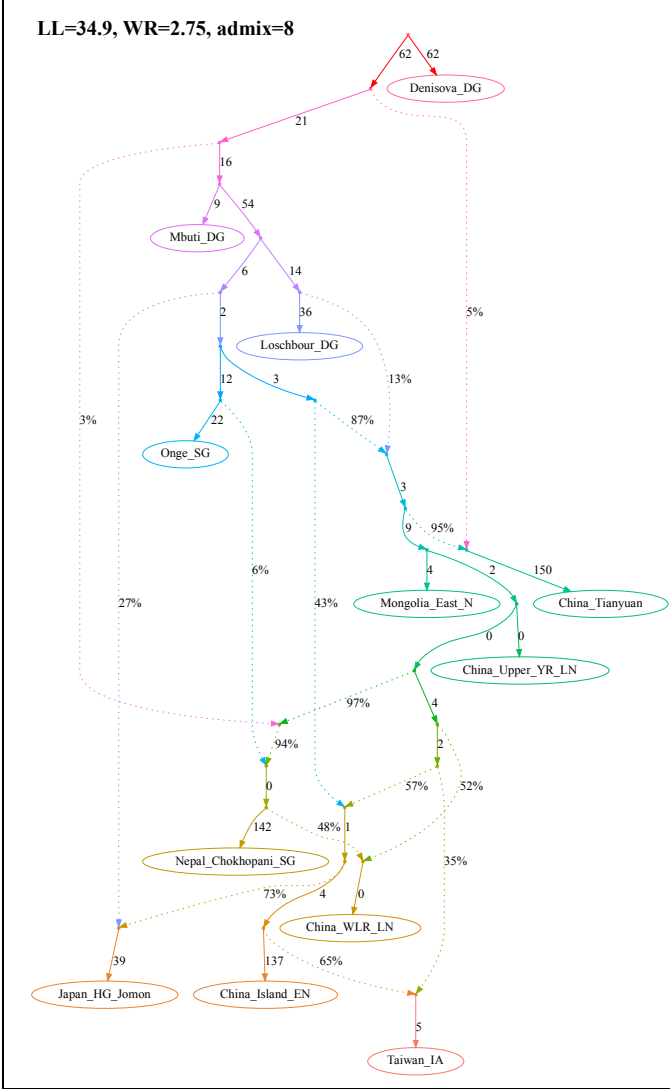

no. of East Asian groups with Onge-related ancestry 2  
 no. of East Asian groups with European-related ancestry 8  
 direction of gene flow China\_Island\_EN > Taiwan\_IA forward  
 Mongolia\_East is basal with respect to China\_Upper\_YR and Nepal\_Chokhopani yes  
 Taiwan\_IA is basal with respect to Mongolia\_East and Nepal\_Chokhopani yes

The original set of SNPs and individuals and the original algorithm for calculating  $f_3$ -statistics (496,233 variable site with no missing data at the group level)

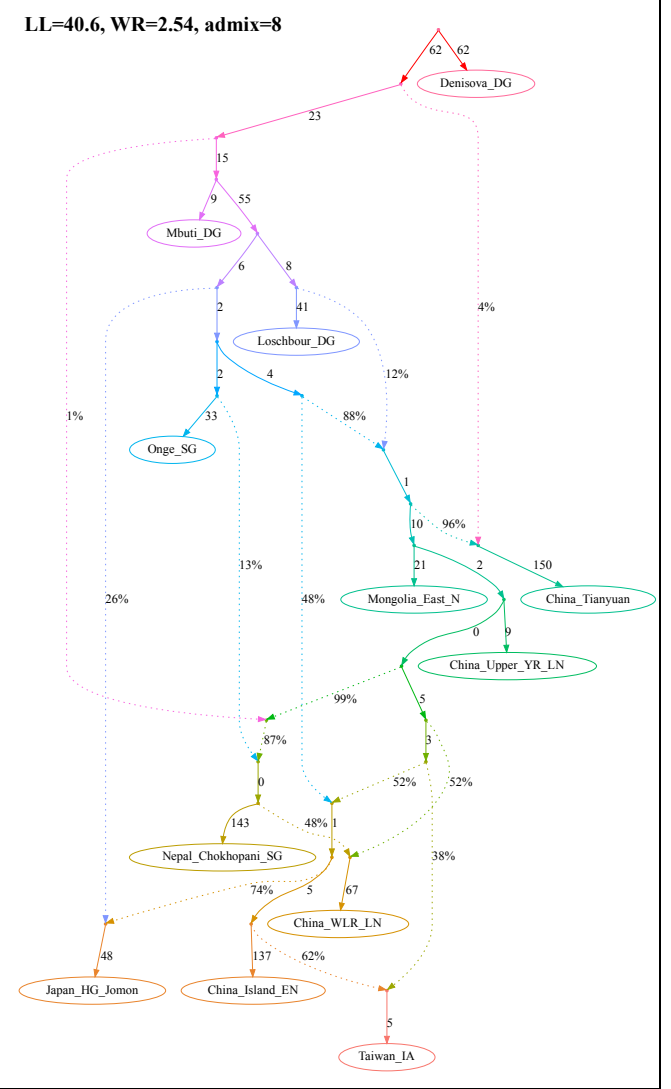

**d, alternative models fitting significantly better than the published one**

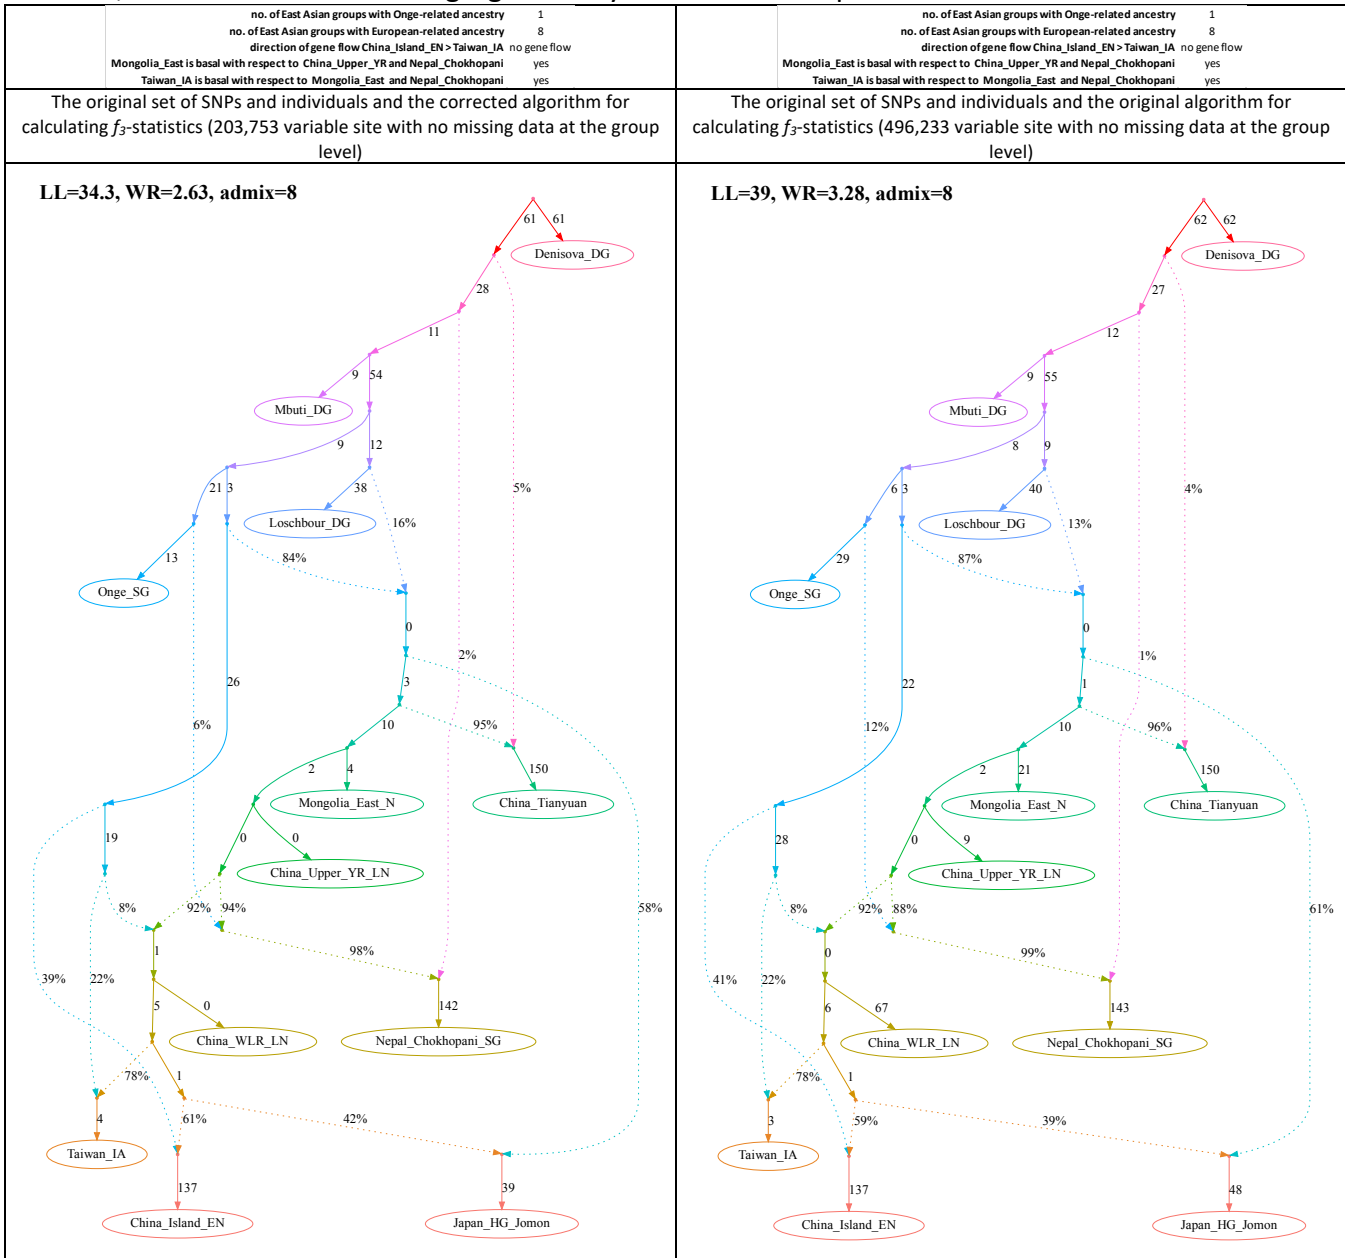

no. of East Asian groups with Onge-related ancestry 1  
 no. of East Asian groups with European-related ancestry 8  
 direction of gene flow China\_Island\_EN > Taiwan\_IA reverse  
 Mongolia\_East is basal with respect to China\_Upper\_YR and Nepal\_Chokhopani yes  
 Taiwan\_IA is basal with respect to Mongolia\_East and Nepal\_Chokhopani yes

The original set of SNPs and individuals and the corrected algorithm for calculating  $f_3$ -statistics (203,753 variable site with no missing data at the group level)

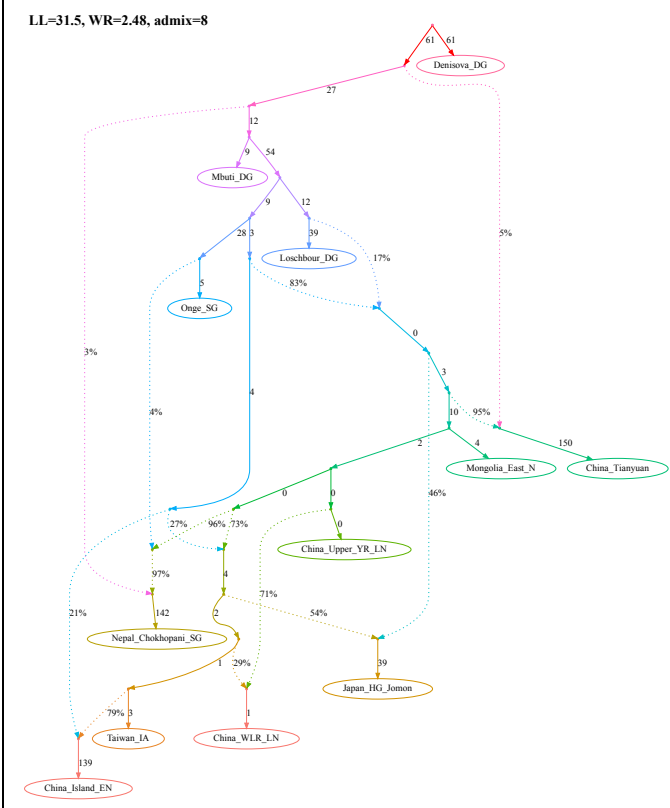

no. of East Asian groups with Onge-related ancestry 1  
 no. of East Asian groups with European-related ancestry 8  
 direction of gene flow China\_Island\_EN > Taiwan\_IA reverse  
 Mongolia\_East is basal with respect to China\_Upper\_YR and Nepal\_Chokhopani yes  
 Taiwan\_IA is basal with respect to Mongolia\_East and Nepal\_Chokhopani yes

The original set of SNPs and individuals and the original algorithm for calculating  $f_3$ -statistics (496,233 variable site with no missing data at the group level)

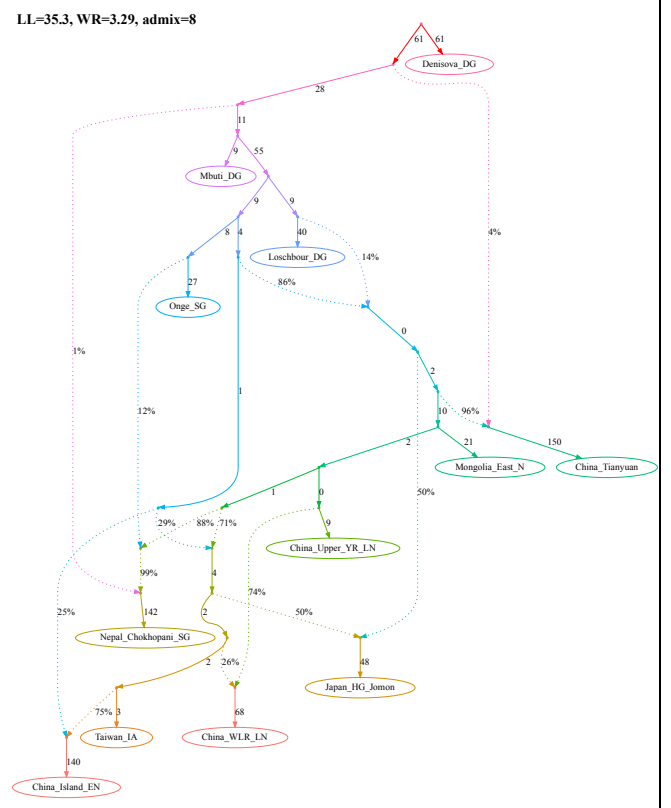

e, alternative models fitting significantly better than the published one

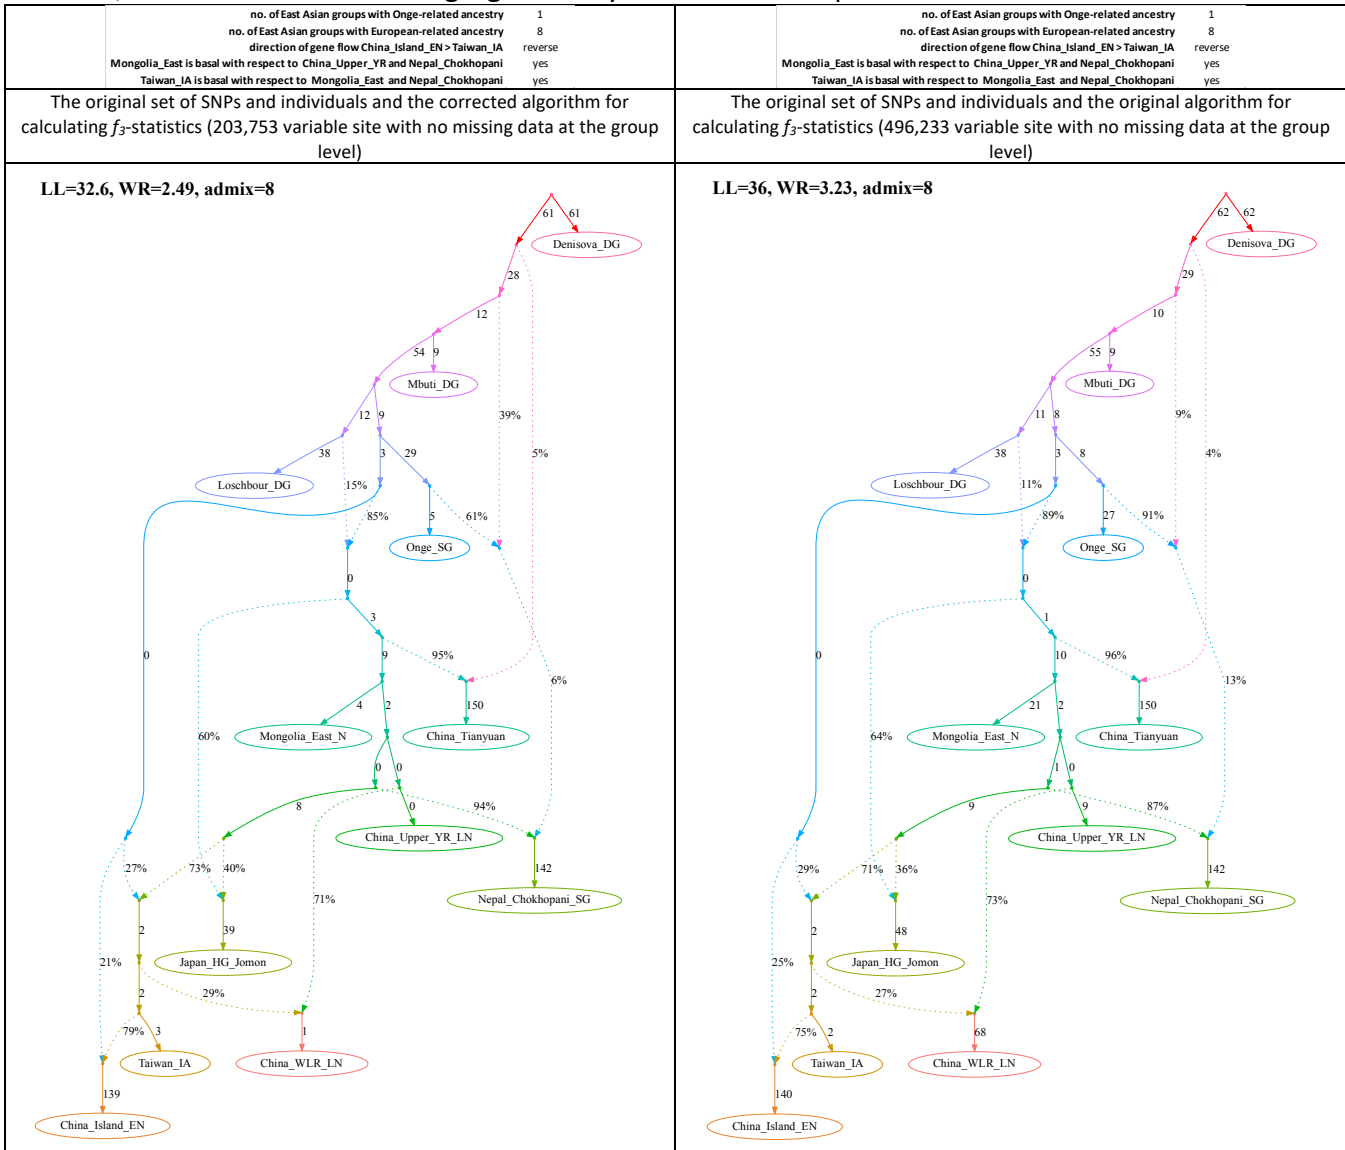

|                                                                            |         |
|----------------------------------------------------------------------------|---------|
| no. of East Asian groups with Onge-related ancestry                        | 1       |
| no. of East Asian groups with European-related ancestry                    | 8       |
| direction of gene flow China_Island_EN > Taiwan_IA                         | reverse |
| Mongolia_East is basal with respect to China_Upper_YR and Nepal_Chokhopani | yes     |
| Taiwan_IA is basal with respect to Mongolia_East and Nepal_Chokhopani      | yes     |

The original set of SNPs and individuals and the corrected algorithm for calculating  $f_3$ -statistics (203,753 variable site with no missing data at the group level)

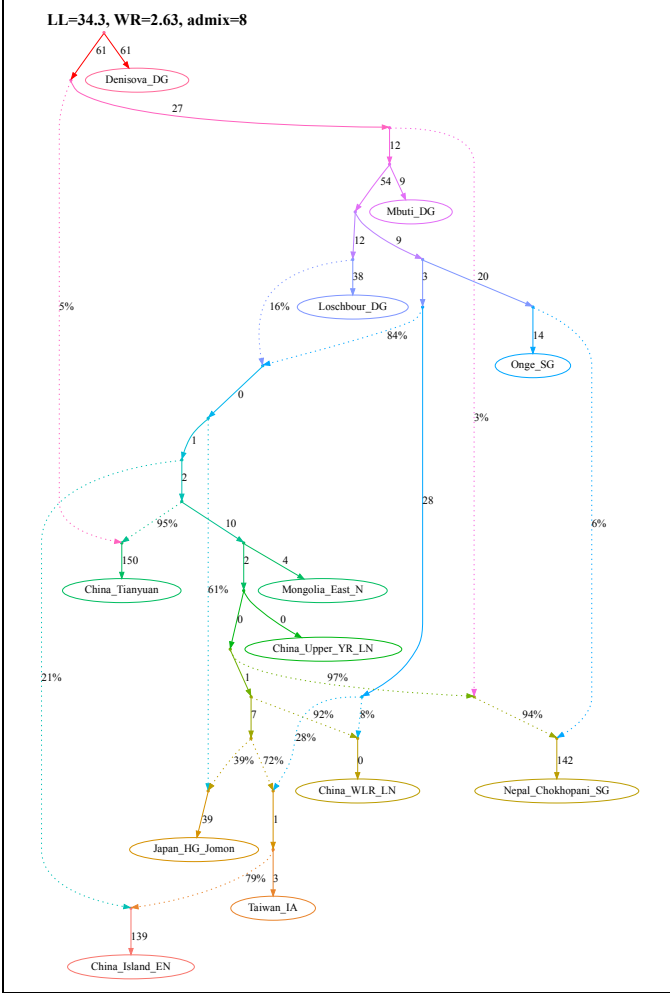

|                                                                            |         |
|----------------------------------------------------------------------------|---------|
| no. of East Asian groups with Onge-related ancestry                        | 1       |
| no. of East Asian groups with European-related ancestry                    | 8       |
| direction of gene flow China_Island_EN > Taiwan_IA                         | reverse |
| Mongolia_East is basal with respect to China_Upper_YR and Nepal_Chokhopani | yes     |
| Taiwan_IA is basal with respect to Mongolia_East and Nepal_Chokhopani      | yes     |

The original set of SNPs and individuals and the original algorithm for calculating  $f_3$ -statistics (496,233 variable site with no missing data at the group level)

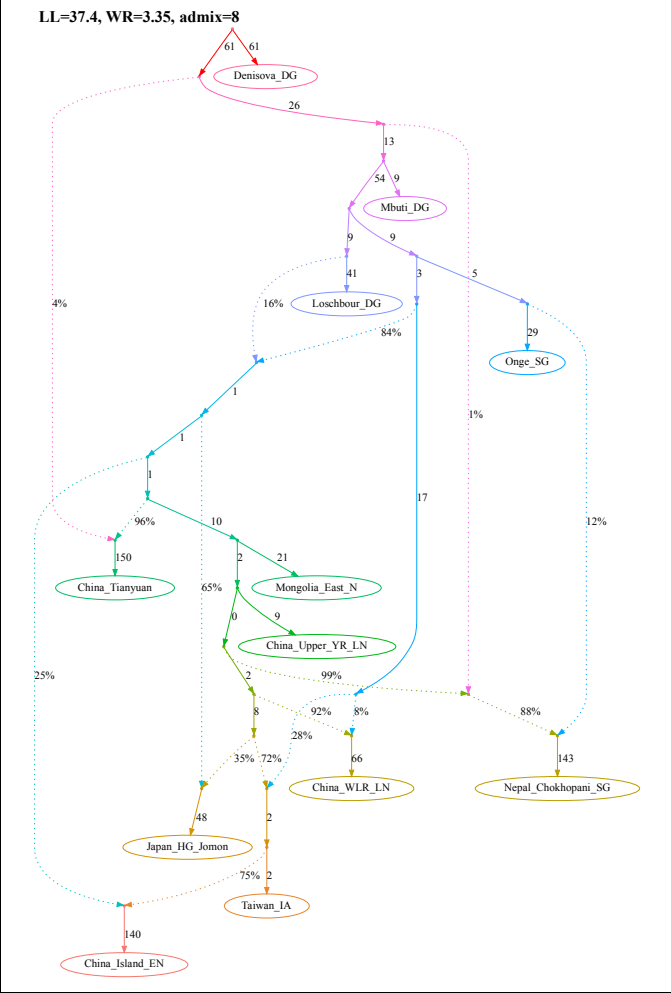



**f, alternative models fitting significantly better than the published one**

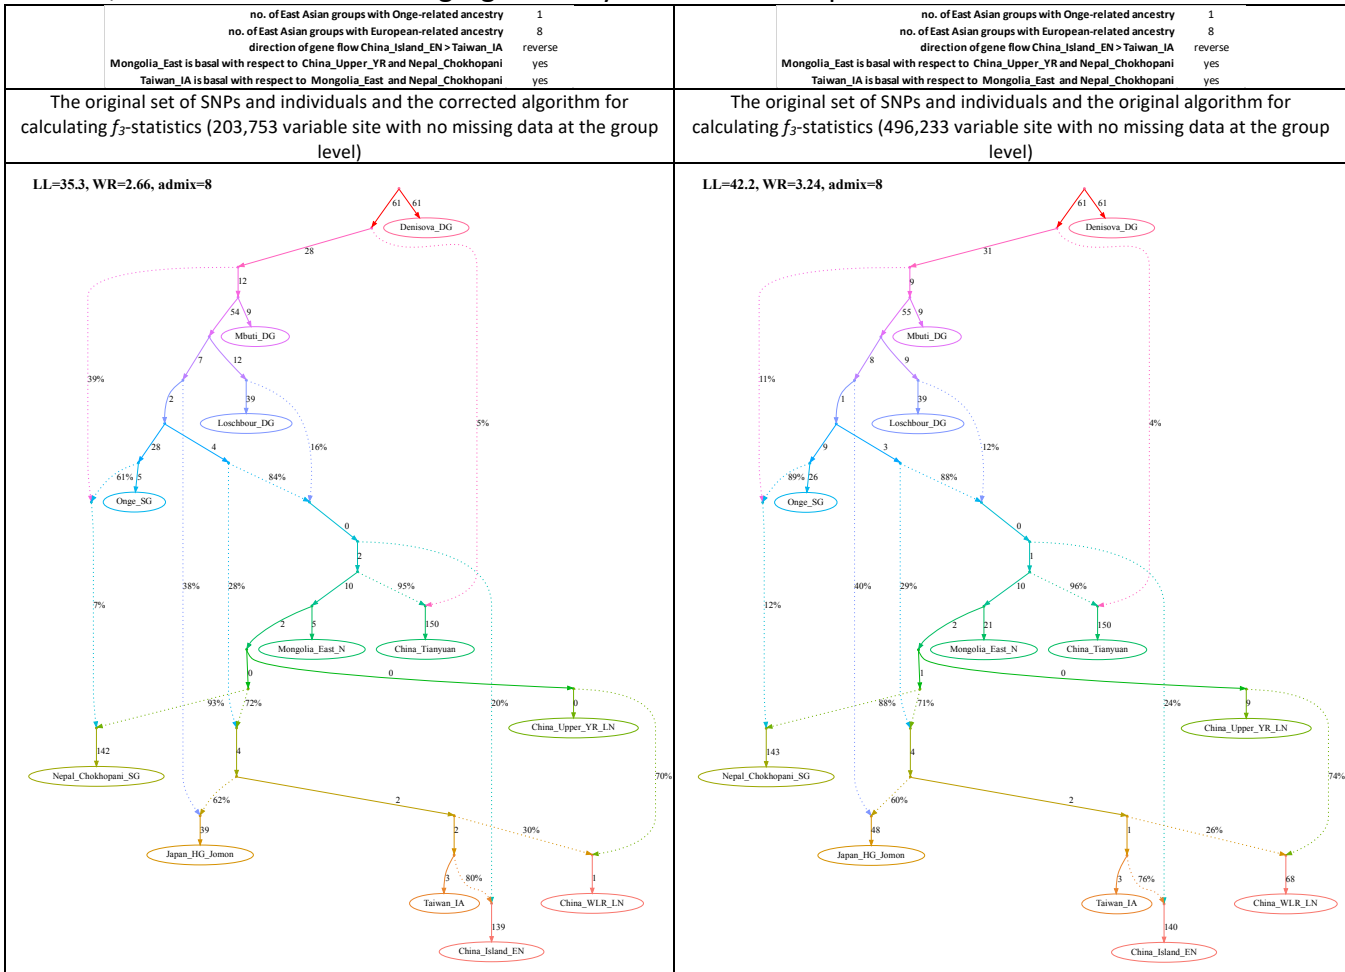

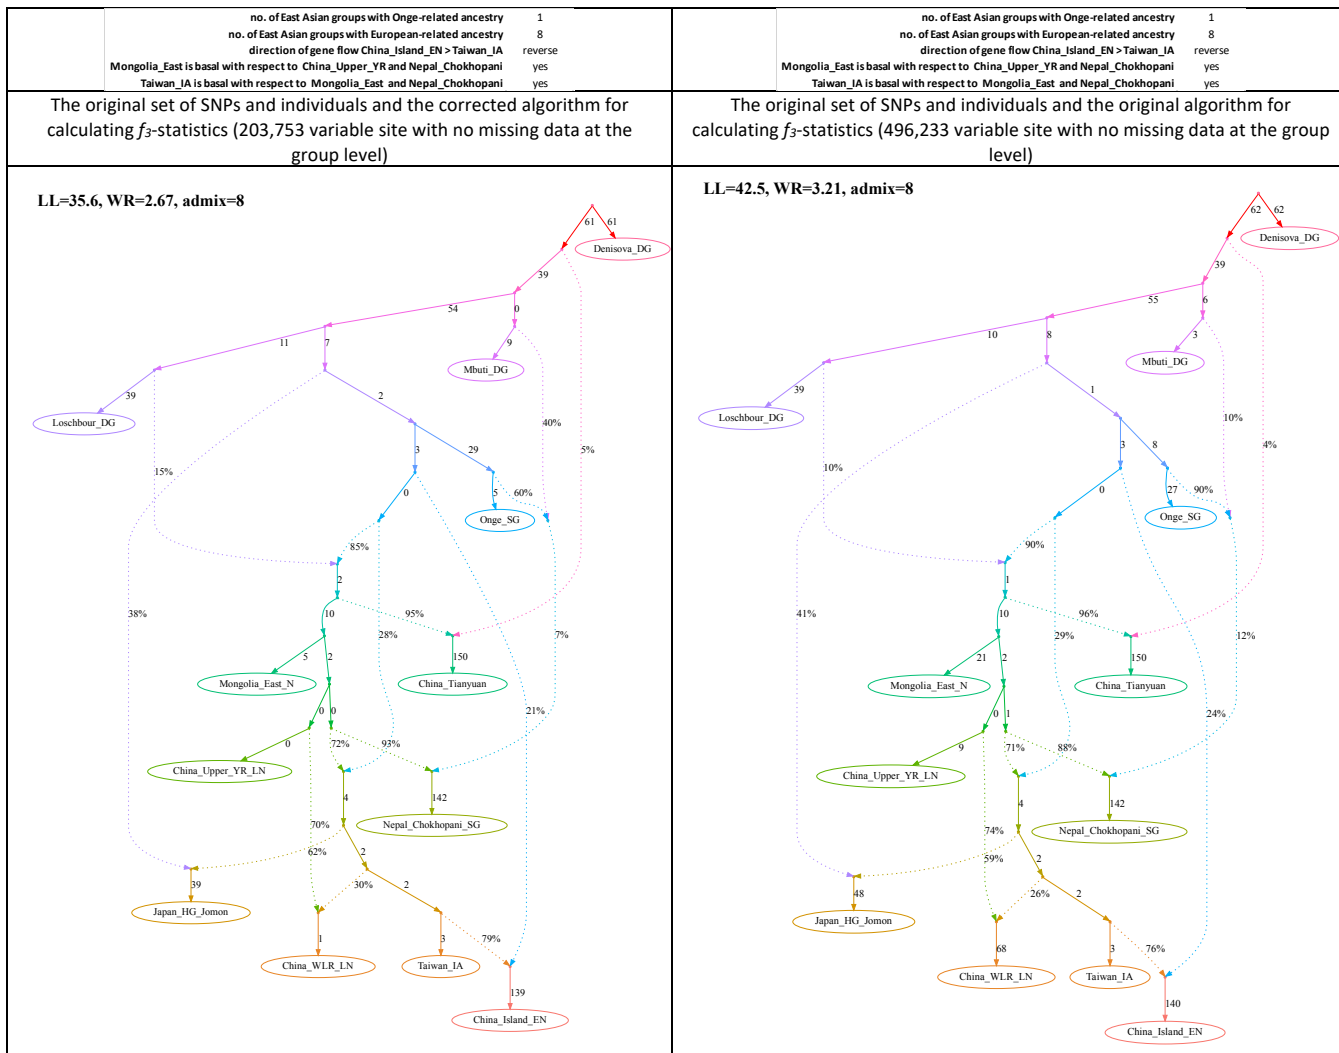

**g, alternative models fitting significantly better than the published one**

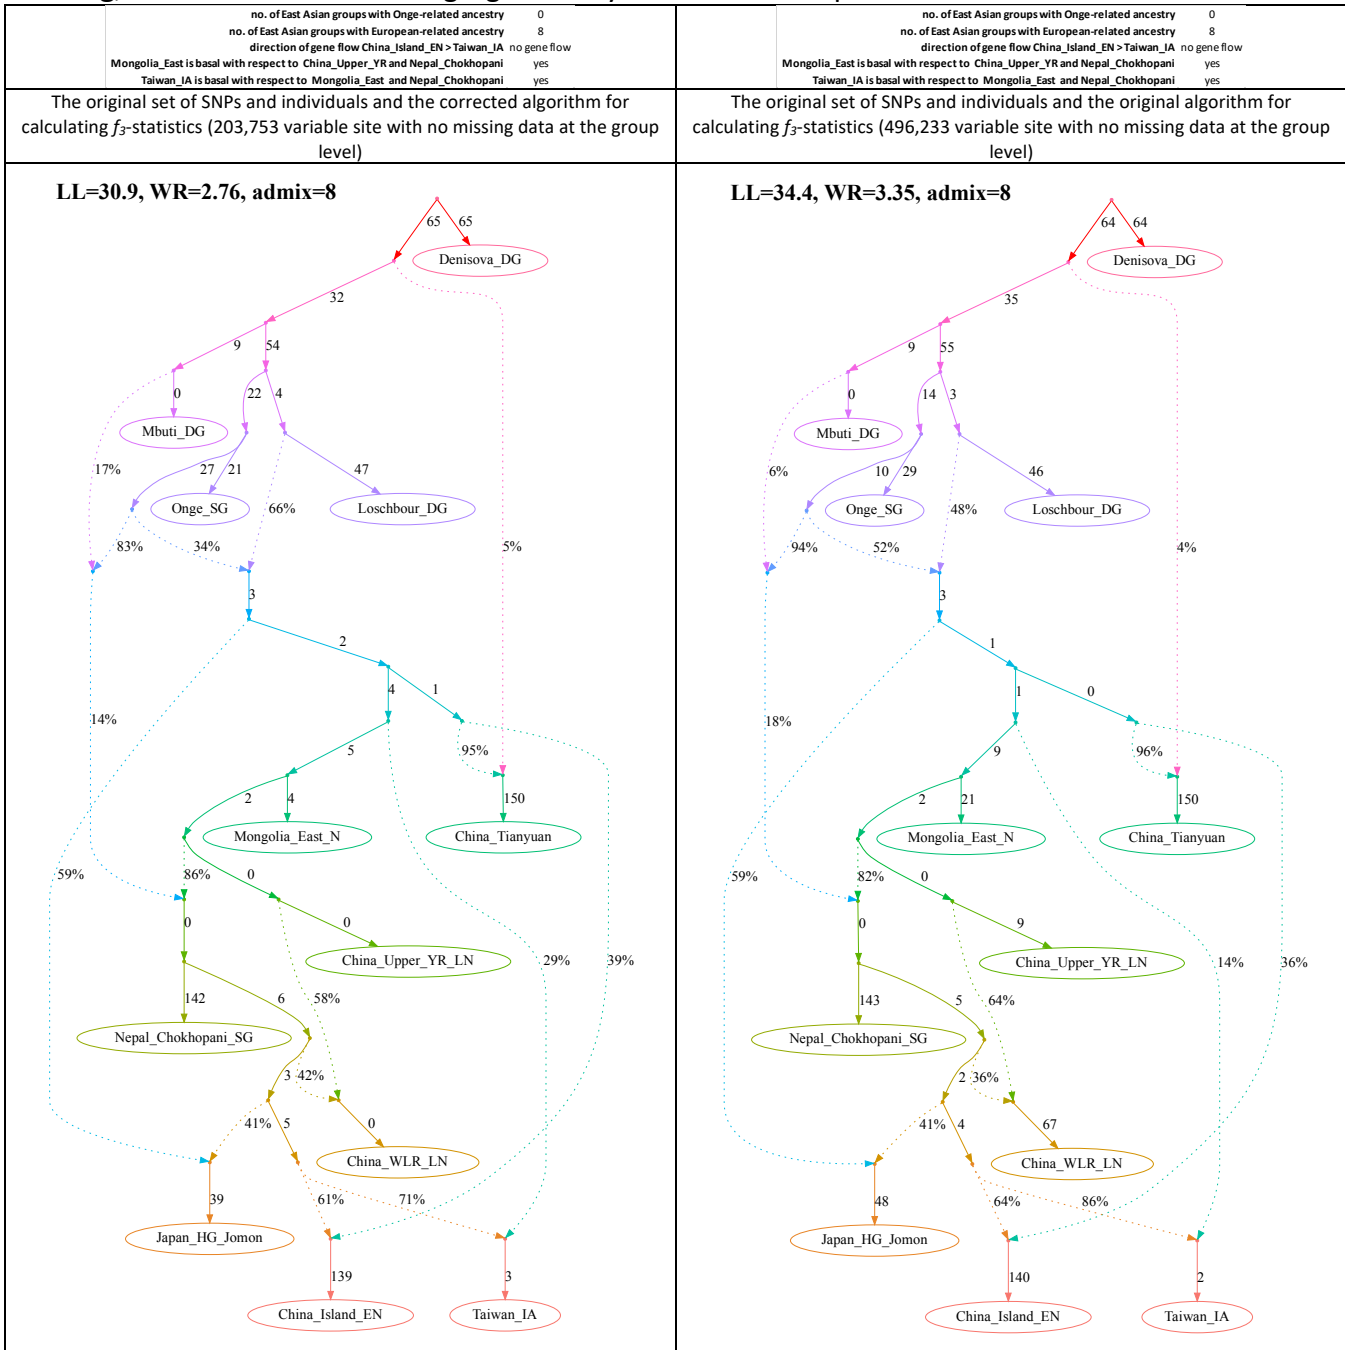

no. of East Asian groups with Onge-related ancestry 0  
 no. of East Asian groups with European-related ancestry 8  
 direction of gene flow China\_Island\_EN > Taiwan\_IA no gene flow  
 Mongolia\_East is basal with respect to China\_Upper\_YR and Nepal\_Chokhopani yes  
 Taiwan\_IA is basal with respect to Mongolia\_East and Nepal\_Chokhopani yes

The original set of SNPs and individuals and the corrected algorithm for calculating  $f_3$ -statistics (203,753 variable site with no missing data at the group level)

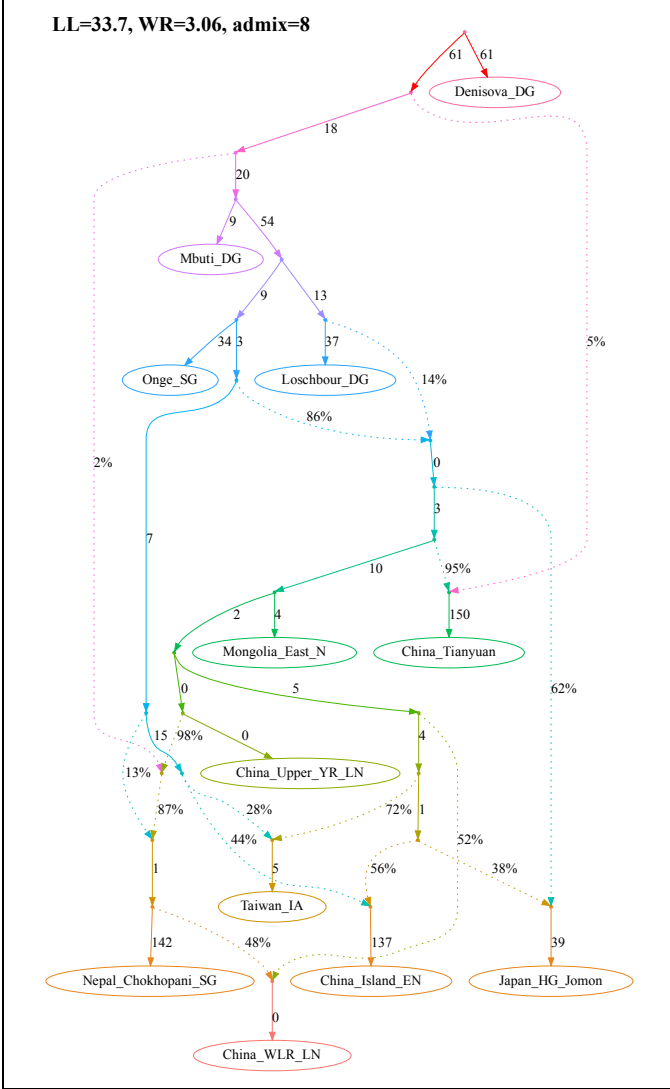

no. of East Asian groups with Onge-related ancestry 0  
 no. of East Asian groups with European-related ancestry 8  
 direction of gene flow China\_Island\_EN > Taiwan\_IA no gene flow  
 Mongolia\_East is basal with respect to China\_Upper\_YR and Nepal\_Chokhopani yes  
 Taiwan\_IA is basal with respect to Mongolia\_East and Nepal\_Chokhopani yes

The original set of SNPs and individuals and the original algorithm for calculating  $f_3$ -statistics (496,233 variable site with no missing data at the group level)

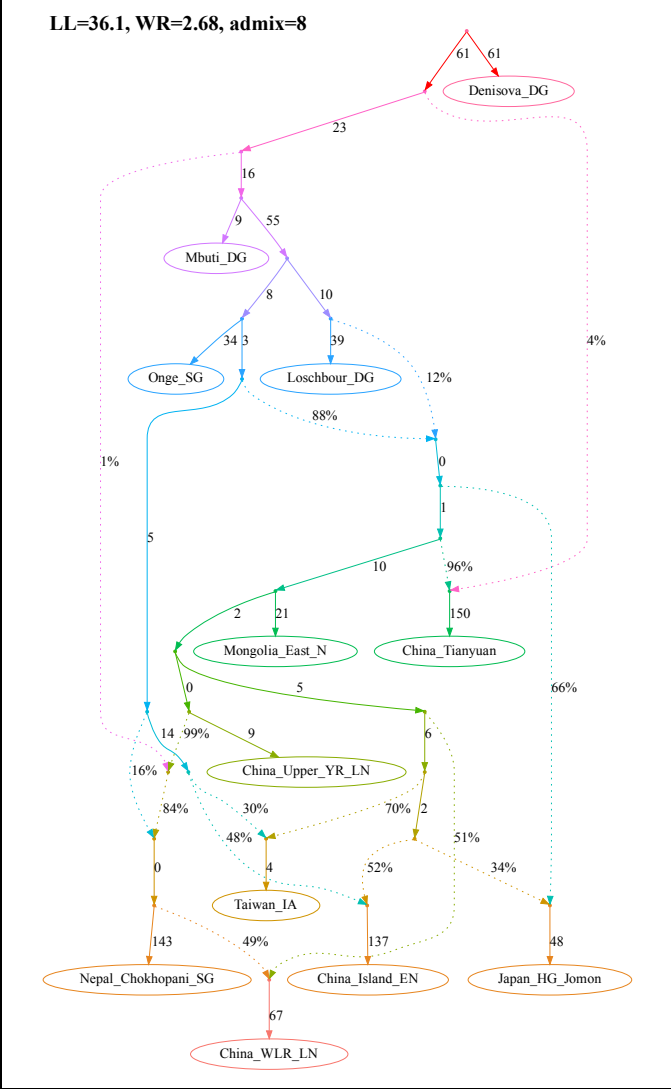

### h, alternative models fitting significantly better than the published one

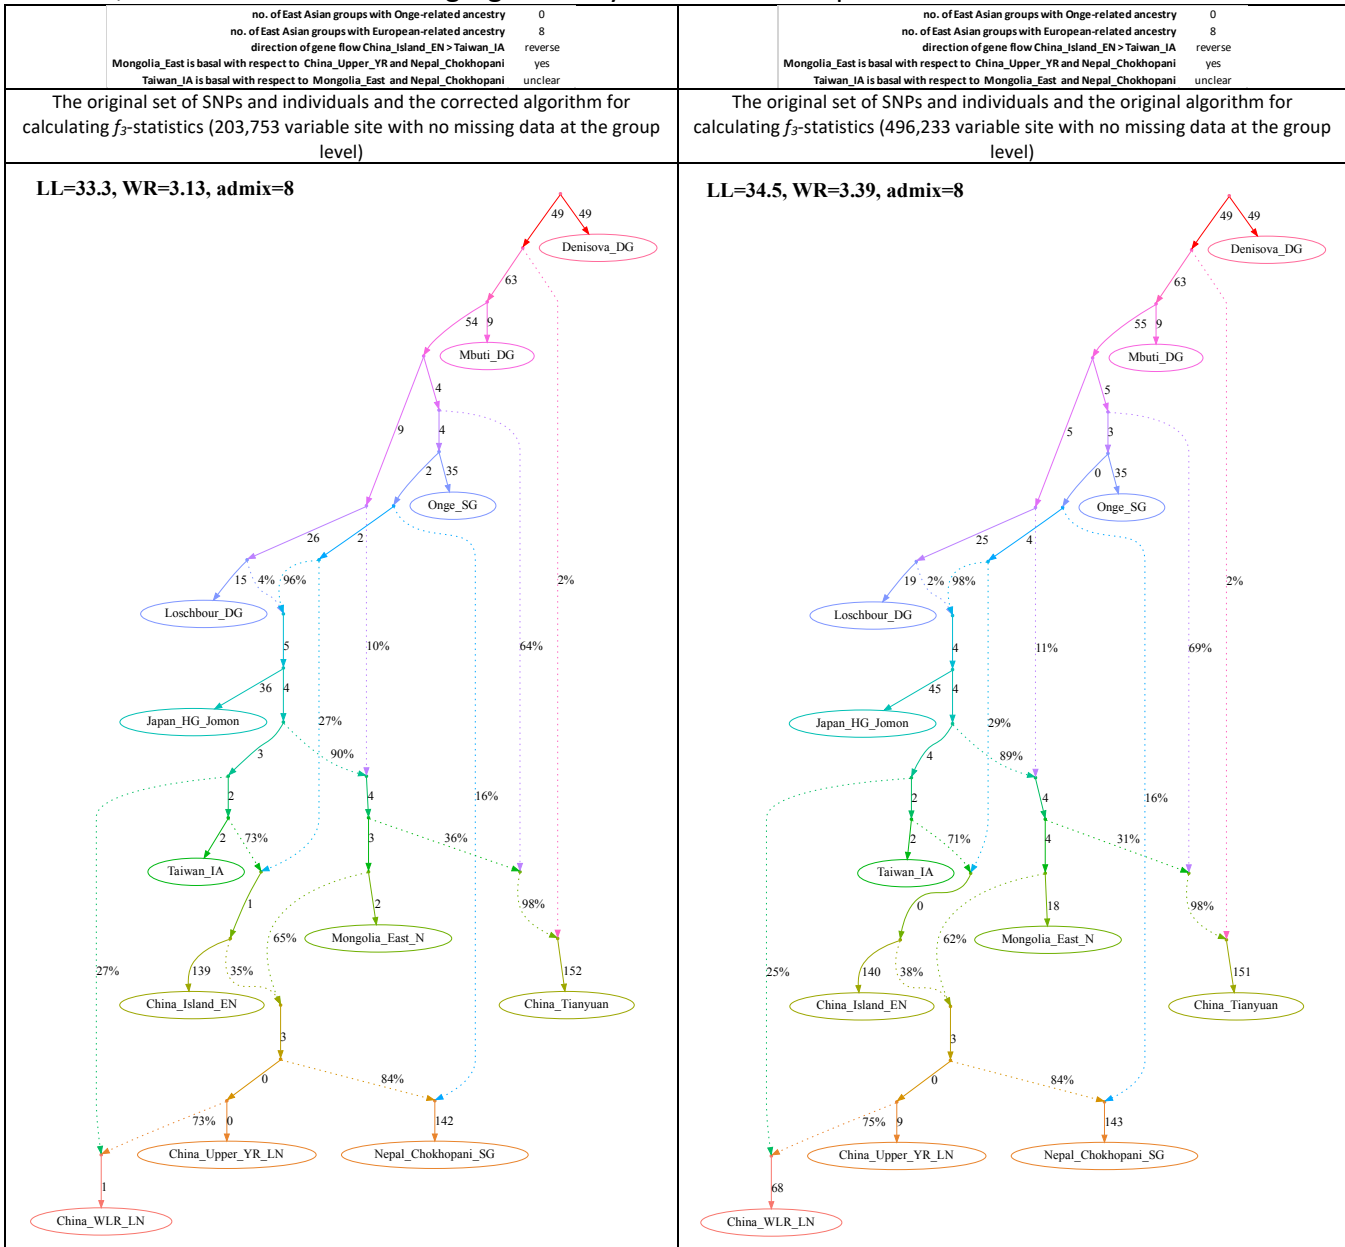

no. of East Asian groups with Onge-related ancestry 0  
 no. of East Asian groups with European-related ancestry 8  
 direction of gene flow China\_Island\_EN > Taiwan\_IA reverse  
 Mongolia\_East is basal with respect to China\_Upper\_YR and Nepal\_Chokhopani yes  
 Taiwan\_IA is basal with respect to Mongolia\_East and Nepal\_Chokhopani yes

no. of East Asian groups with Onge-related ancestry 0  
 no. of East Asian groups with European-related ancestry 8  
 direction of gene flow China\_Island\_EN > Taiwan\_IA reverse  
 Mongolia\_East is basal with respect to China\_Upper\_YR and Nepal\_Chokhopani yes  
 Taiwan\_IA is basal with respect to Mongolia\_East and Nepal\_Chokhopani yes

The original set of SNPs and individuals and the corrected algorithm for calculating  $f_3$ -statistics (203,753 variable site with no missing data at the group level)

The original set of SNPs and individuals and the original algorithm for calculating  $f_3$ -statistics (496,233 variable site with no missing data at the group level)

LL=30.3, WR=2.27, admix=8

LL=29.7, WR=3.34, admix=8

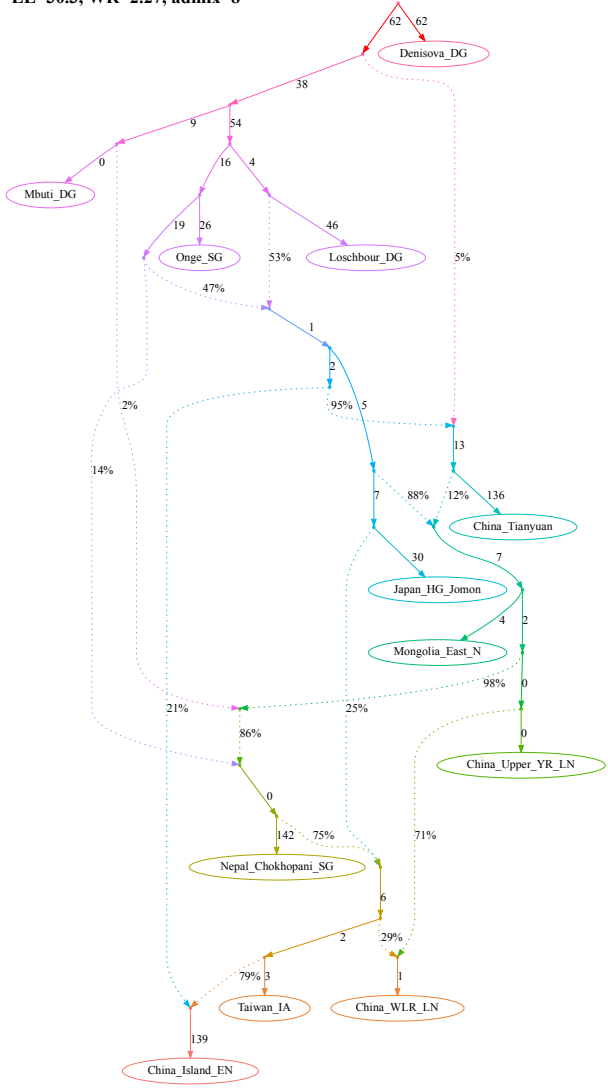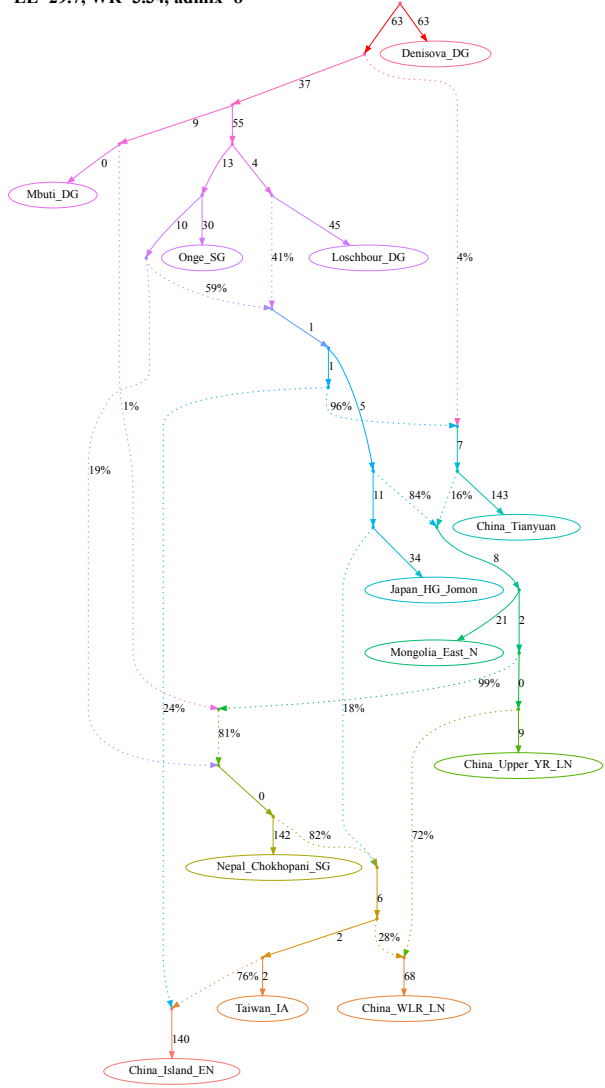

i, alternative models fitting significantly better than the published one

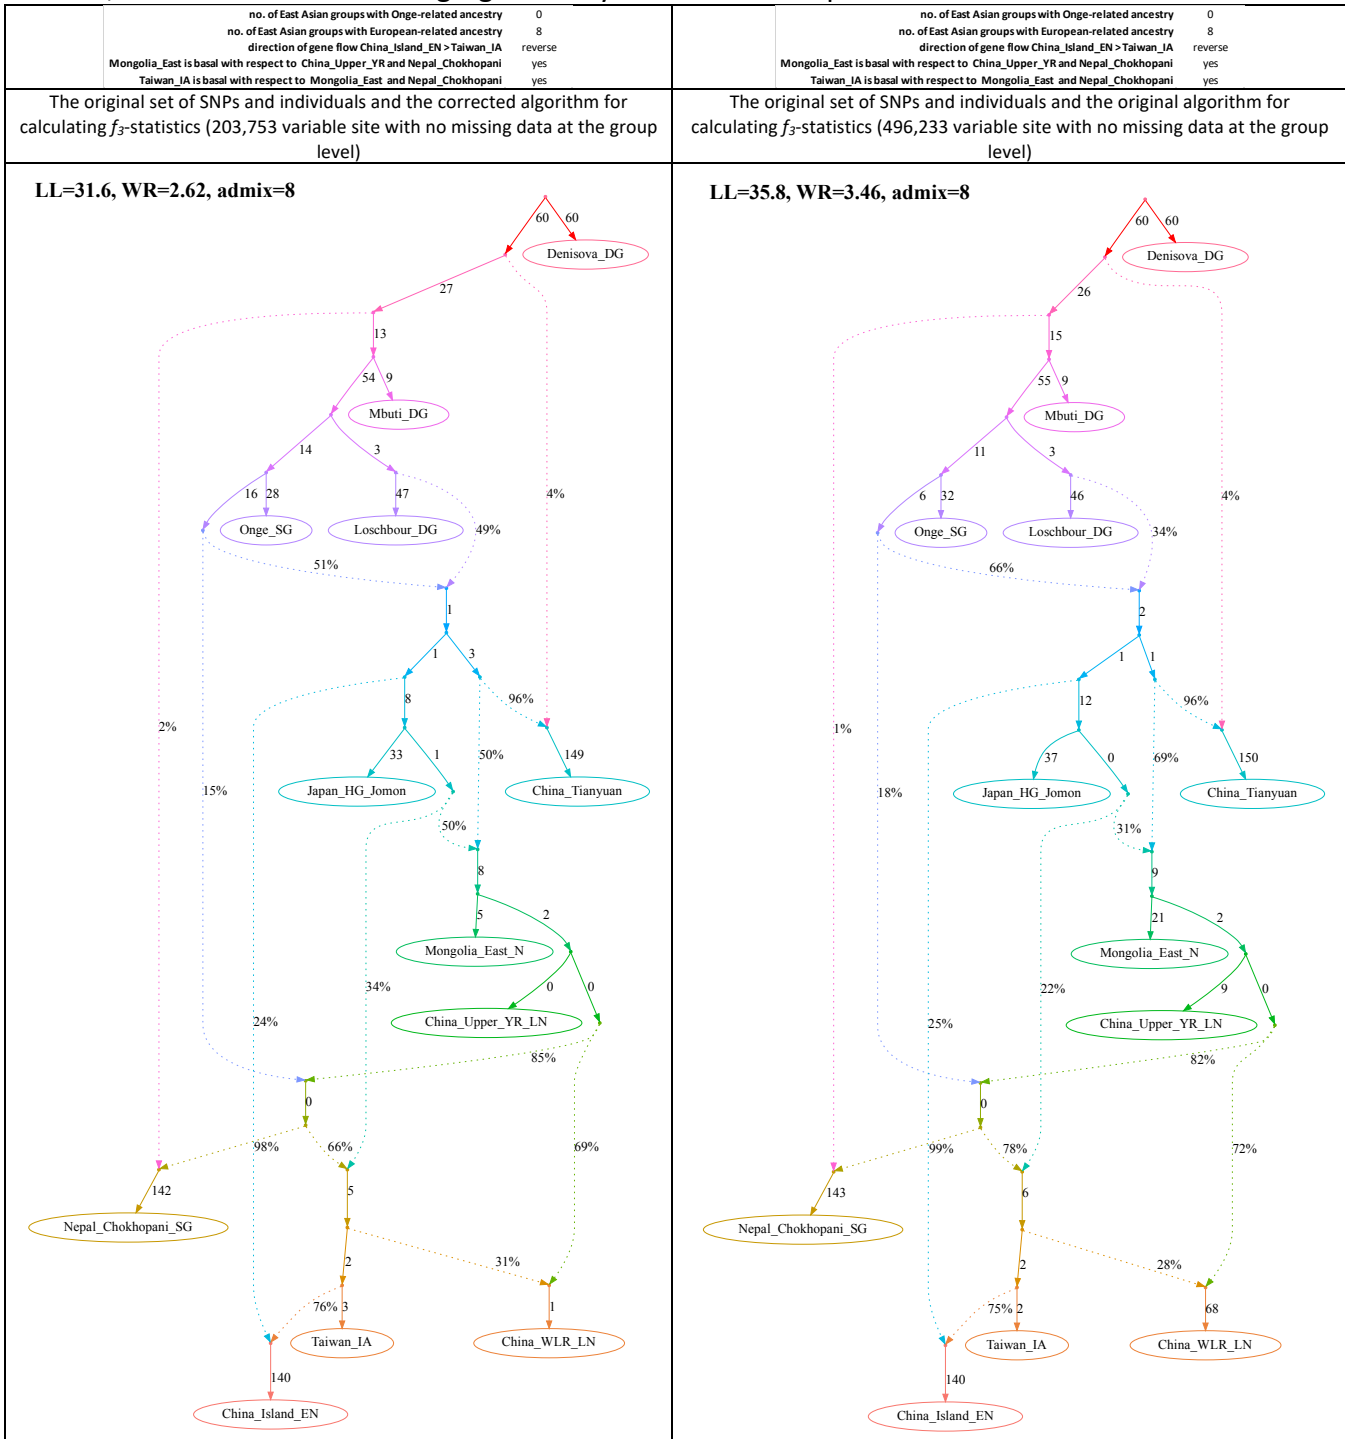

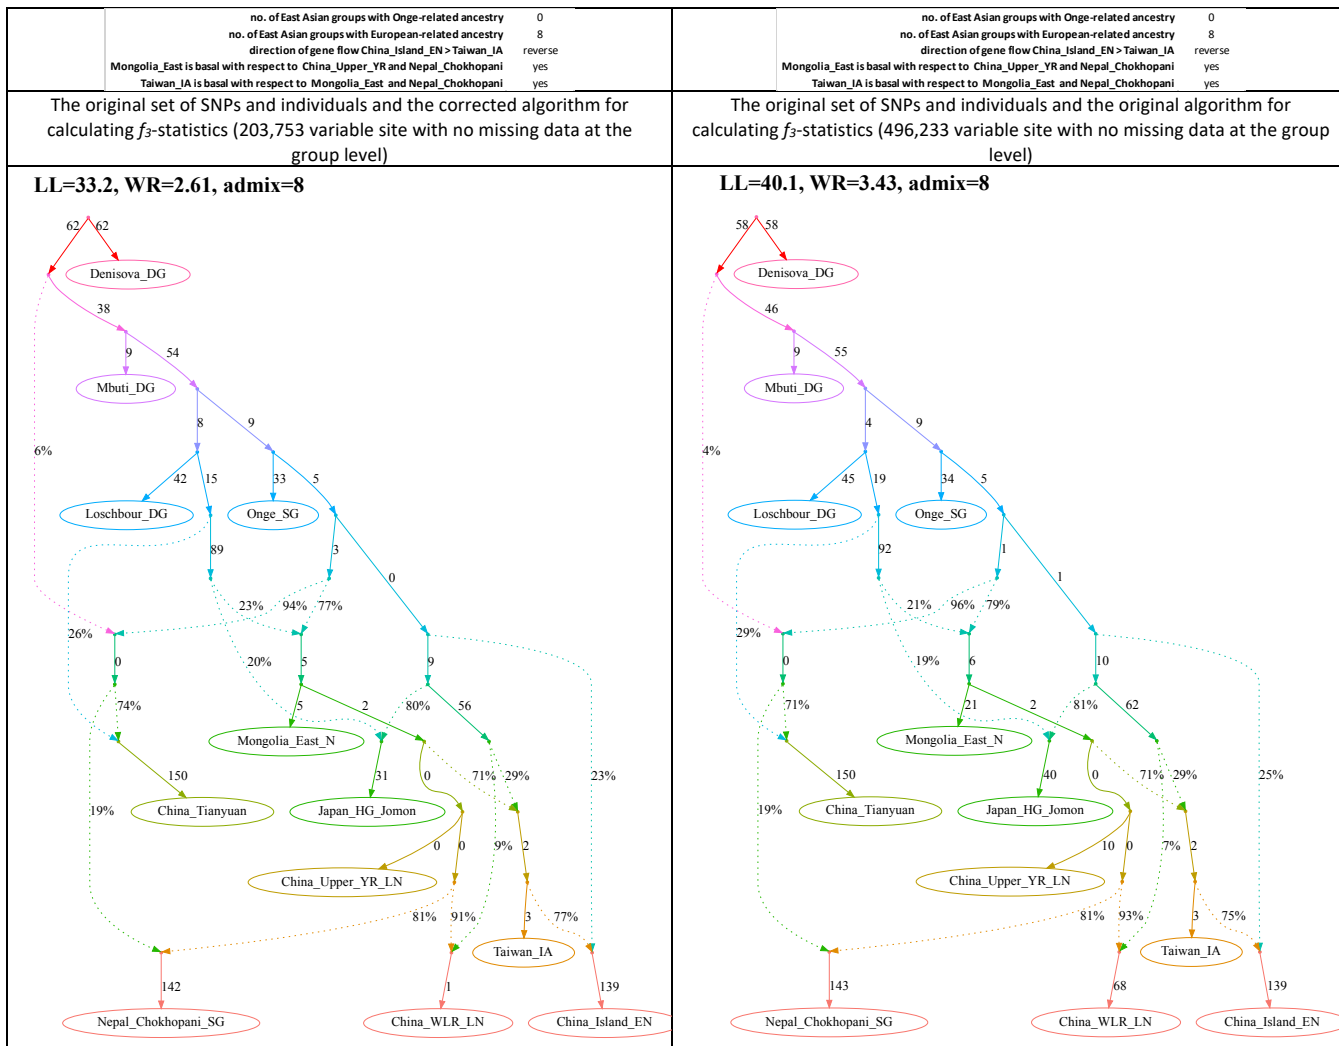



**j**, alternative models fitting significantly better than the published one

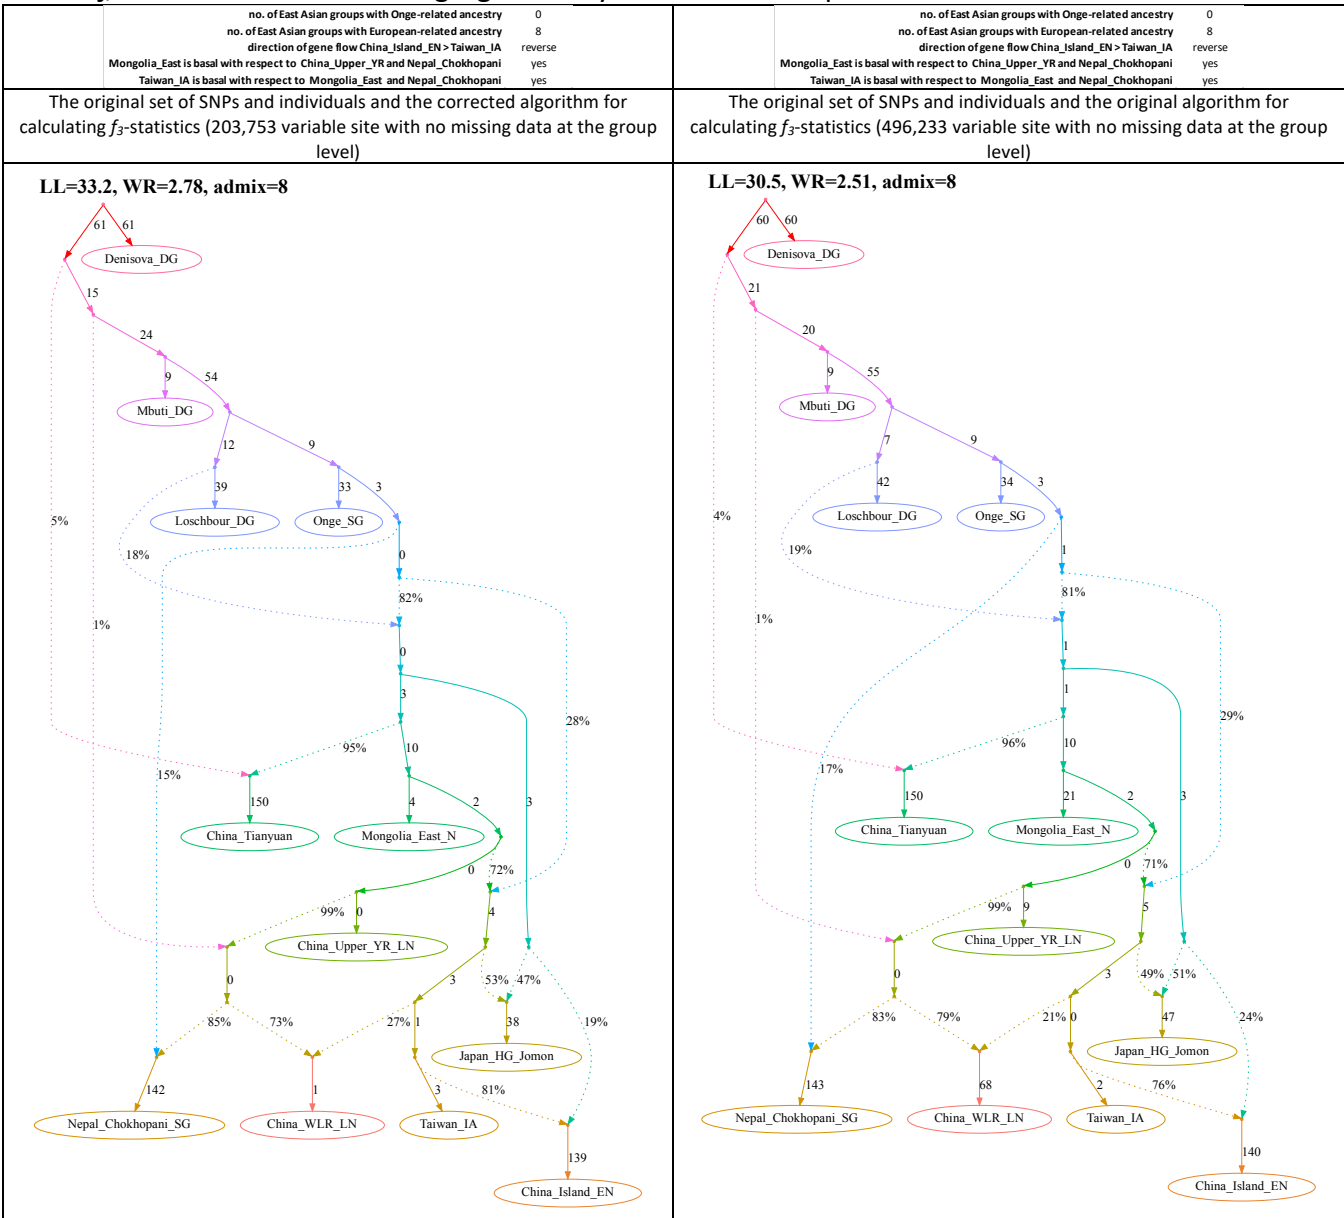

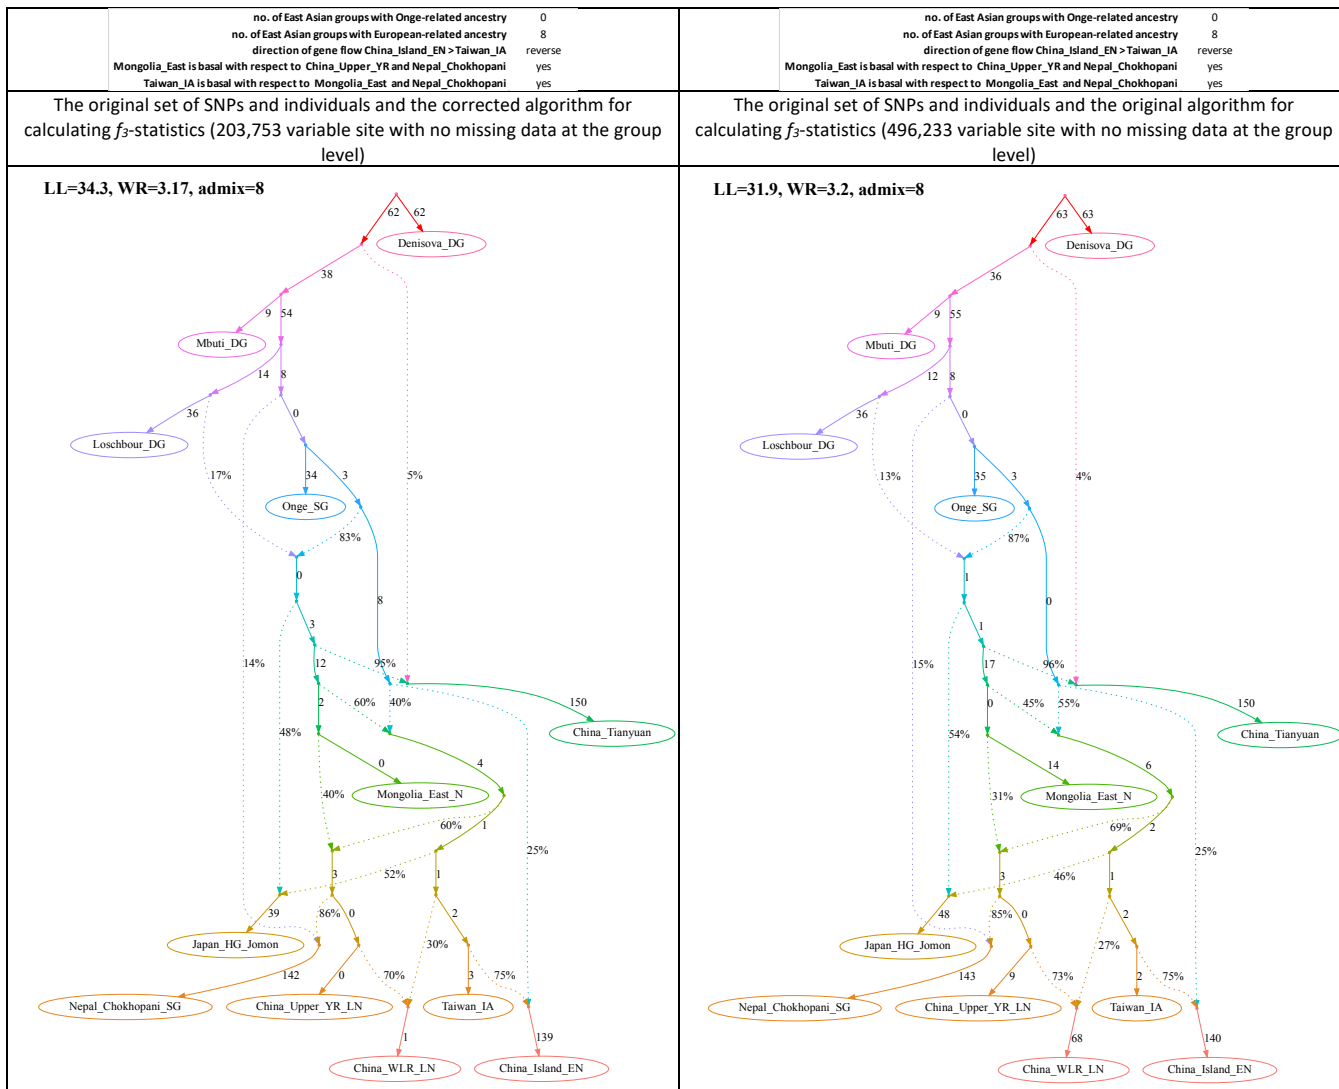

**k, alternative models fitting significantly better than the published one**

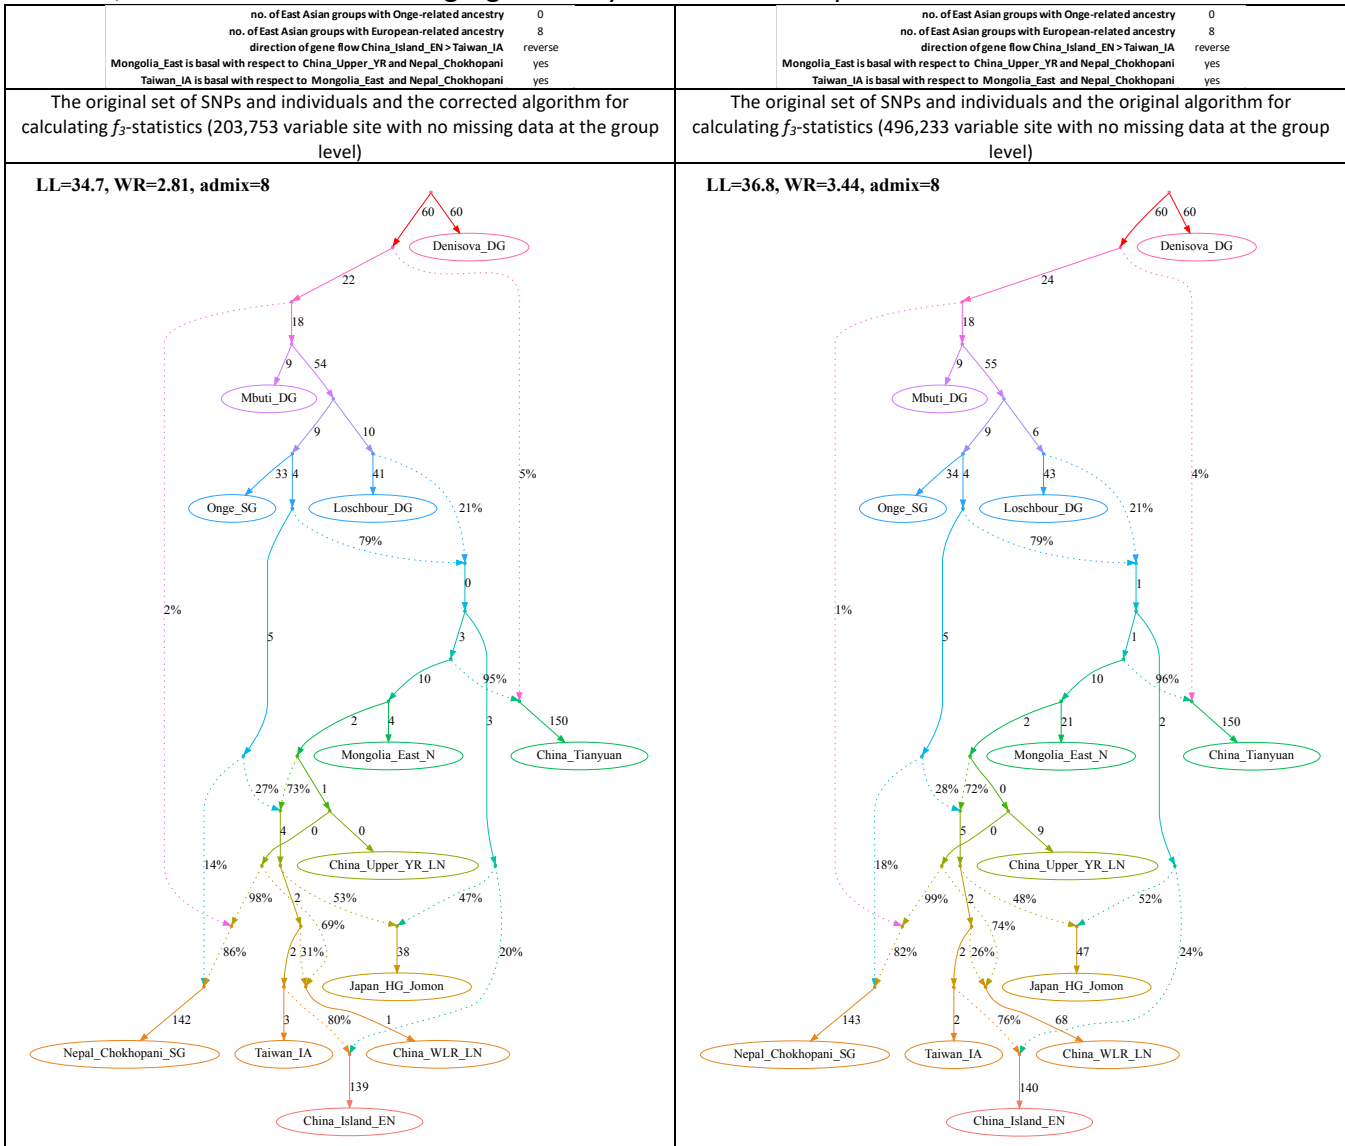

|                                                                            |         |
|----------------------------------------------------------------------------|---------|
| no. of East Asian groups with Onge-related ancestry                        | 0       |
| no. of East Asian groups with European-related ancestry                    | 8       |
| direction of gene flow China_Island_EN > Taiwan_IA                         | reverse |
| Mongolia_East is basal with respect to China_Upper_YR and Nepal_Chokhopani | yes     |
| Taiwan_IA is basal with respect to Mongolia_East and Nepal_Chokhopani      | yes     |

The original set of SNPs and individuals and the corrected algorithm for calculating  $f_3$ -statistics (203,753 variable site with no missing data at the group level)

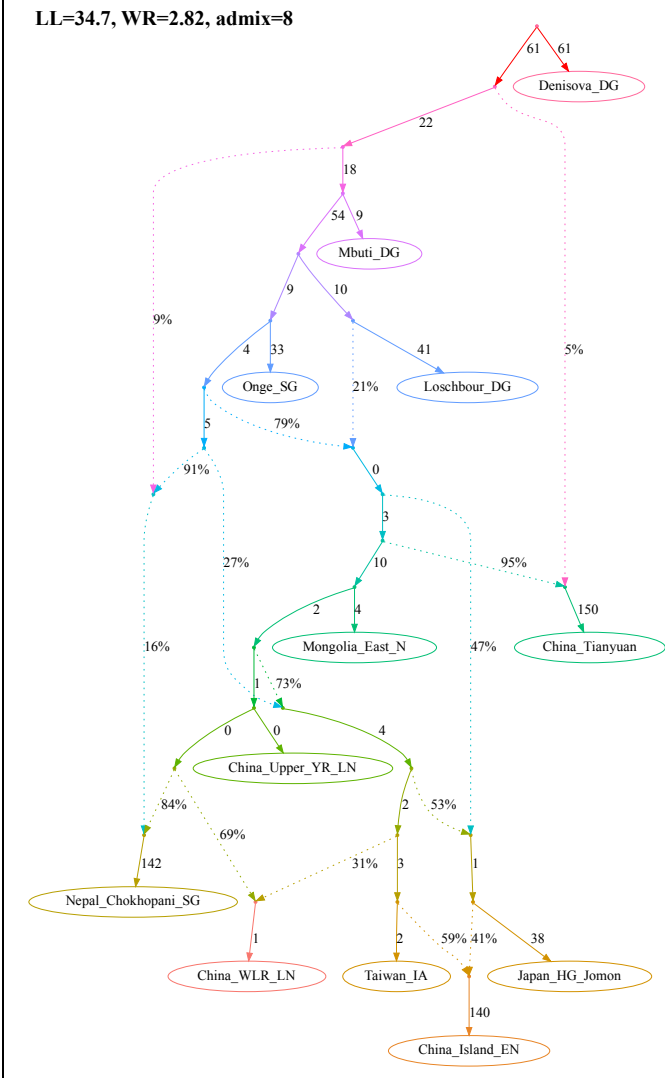

|                                                                            |         |
|----------------------------------------------------------------------------|---------|
| no. of East Asian groups with Onge-related ancestry                        | 0       |
| no. of East Asian groups with European-related ancestry                    | 8       |
| direction of gene flow China_Island_EN > Taiwan_IA                         | reverse |
| Mongolia_East is basal with respect to China_Upper_YR and Nepal_Chokhopani | yes     |
| Taiwan_IA is basal with respect to Mongolia_East and Nepal_Chokhopani      | yes     |

The original set of SNPs and individuals and the original algorithm for calculating  $f_3$ -statistics (496,233 variable site with no missing data at the group level)

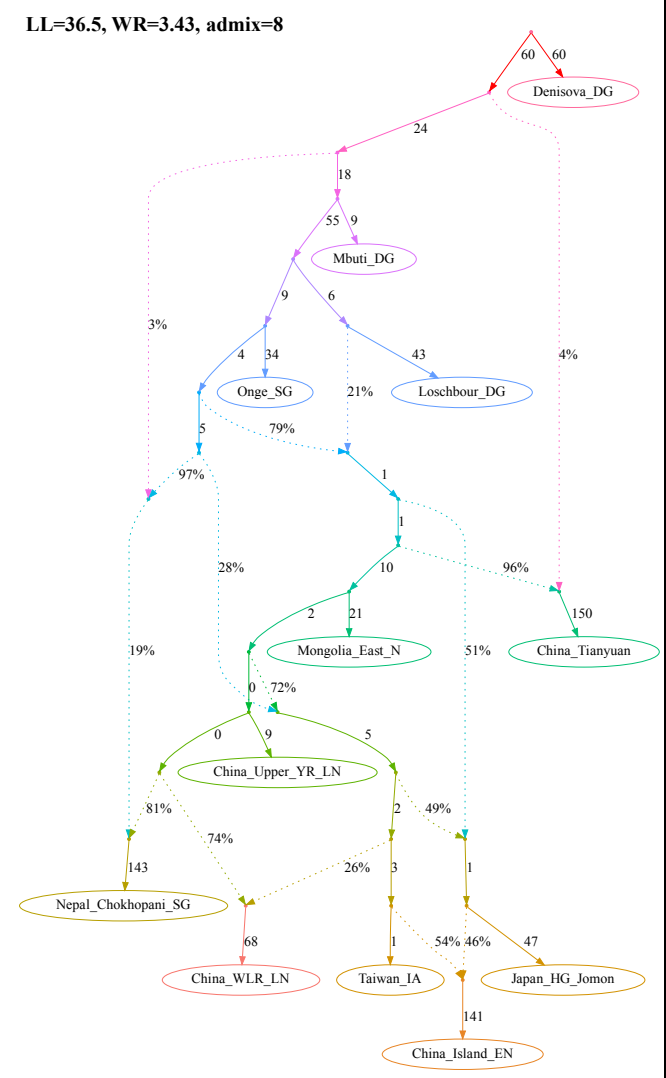

# I, alternative models fitting significantly better than the published one

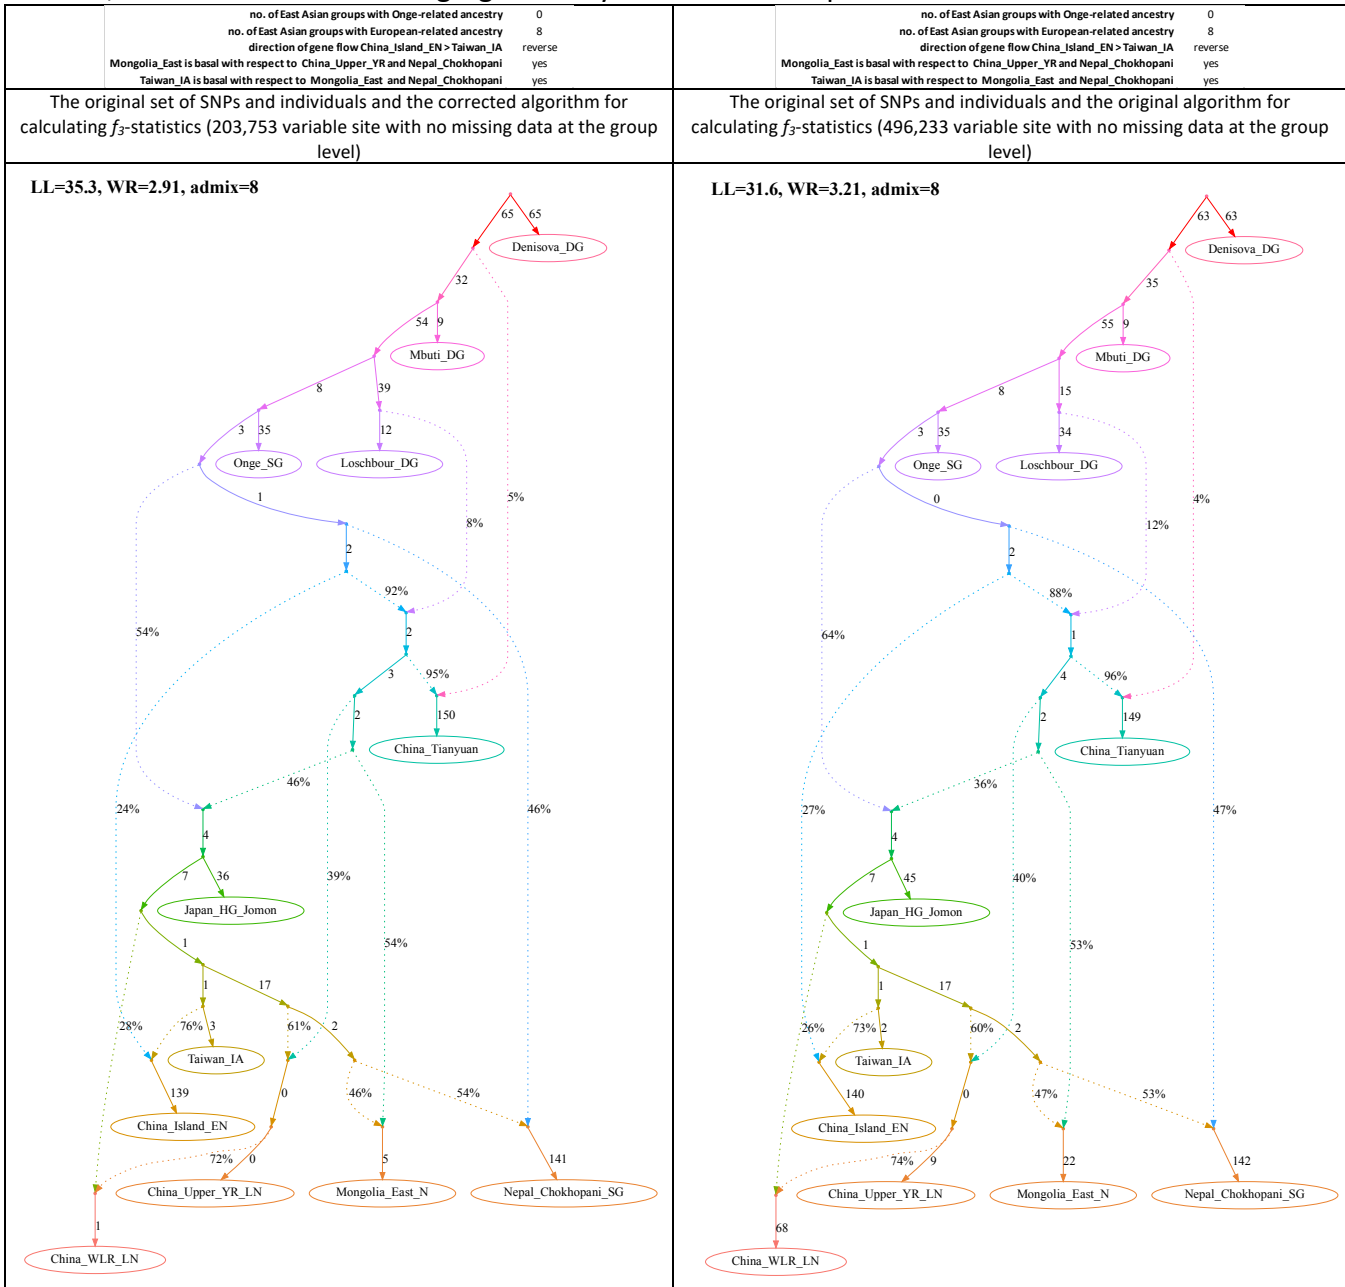

no. of East Asian groups with Onge-related ancestry 0  
 no. of East Asian groups with European-related ancestry 5  
 direction of gene flow China\_Island\_EN>Taiwan\_IA no gene flow  
 Mongolia\_East is basal with respect to China\_Upper\_YR and Nepal\_Chokhopani yes  
 Taiwan\_IA is basal with respect to Mongolia\_East and Nepal\_Chokhopani unclear

The original set of SNPs and individuals and the corrected algorithm for calculating  $f_3$ -statistics (203,753 variable site with no missing data at the group level)

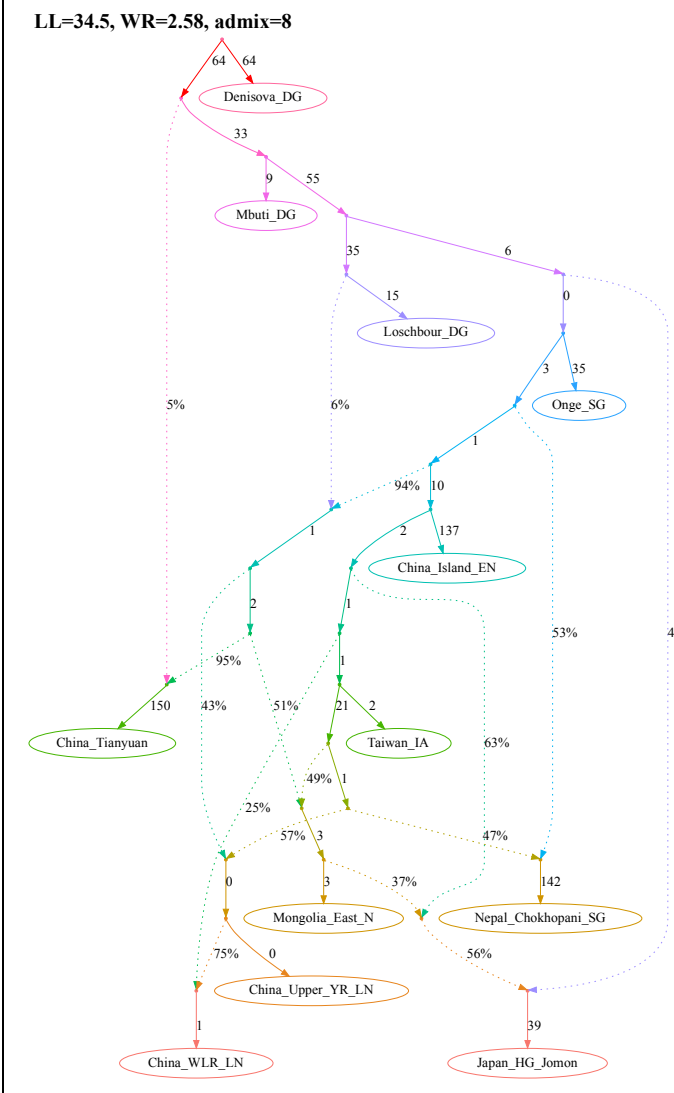

no. of East Asian groups with Onge-related ancestry 0  
 no. of East Asian groups with European-related ancestry 5  
 direction of gene flow China\_Island\_EN>Taiwan\_IA no gene flow  
 Mongolia\_East is basal with respect to China\_Upper\_YR and Nepal\_Chokhopani yes  
 Taiwan\_IA is basal with respect to Mongolia\_East and Nepal\_Chokhopani unclear

The original set of SNPs and individuals and the original algorithm for calculating  $f_3$ -statistics (496,233 variable site with no missing data at the group level)

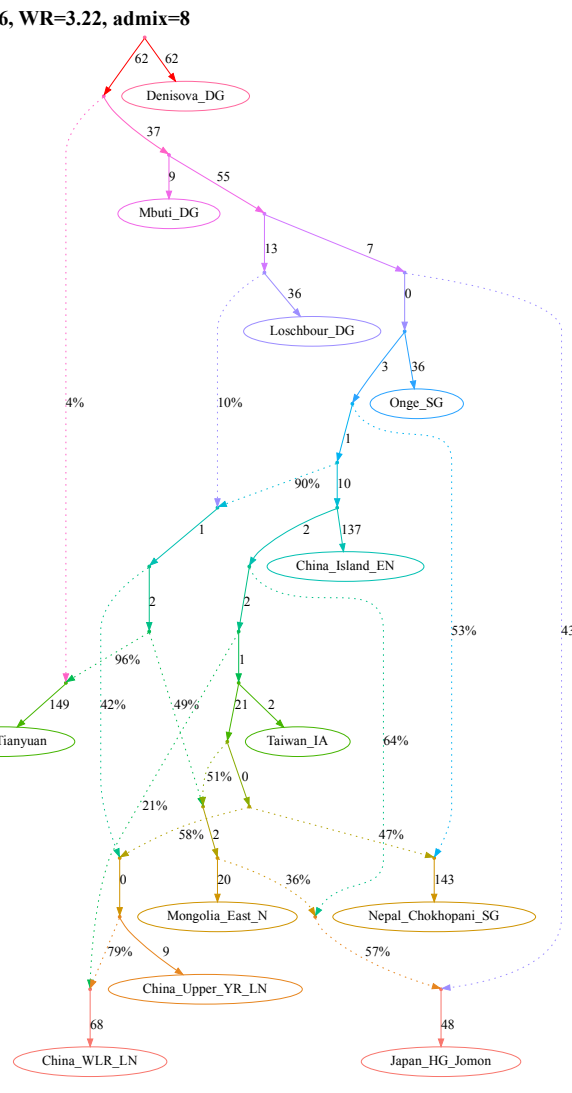

Supplement: fig4-data2 [file elife-85492-fig4-data2-v2.pdf]
