# Supplementary material for: On the limits of fitting complex models of population history to f-statistics
Source: eLife journal article supplement (doi:10.7554/elife.85492), 2023-04-14

Figure S11

**b, published model, simplified**

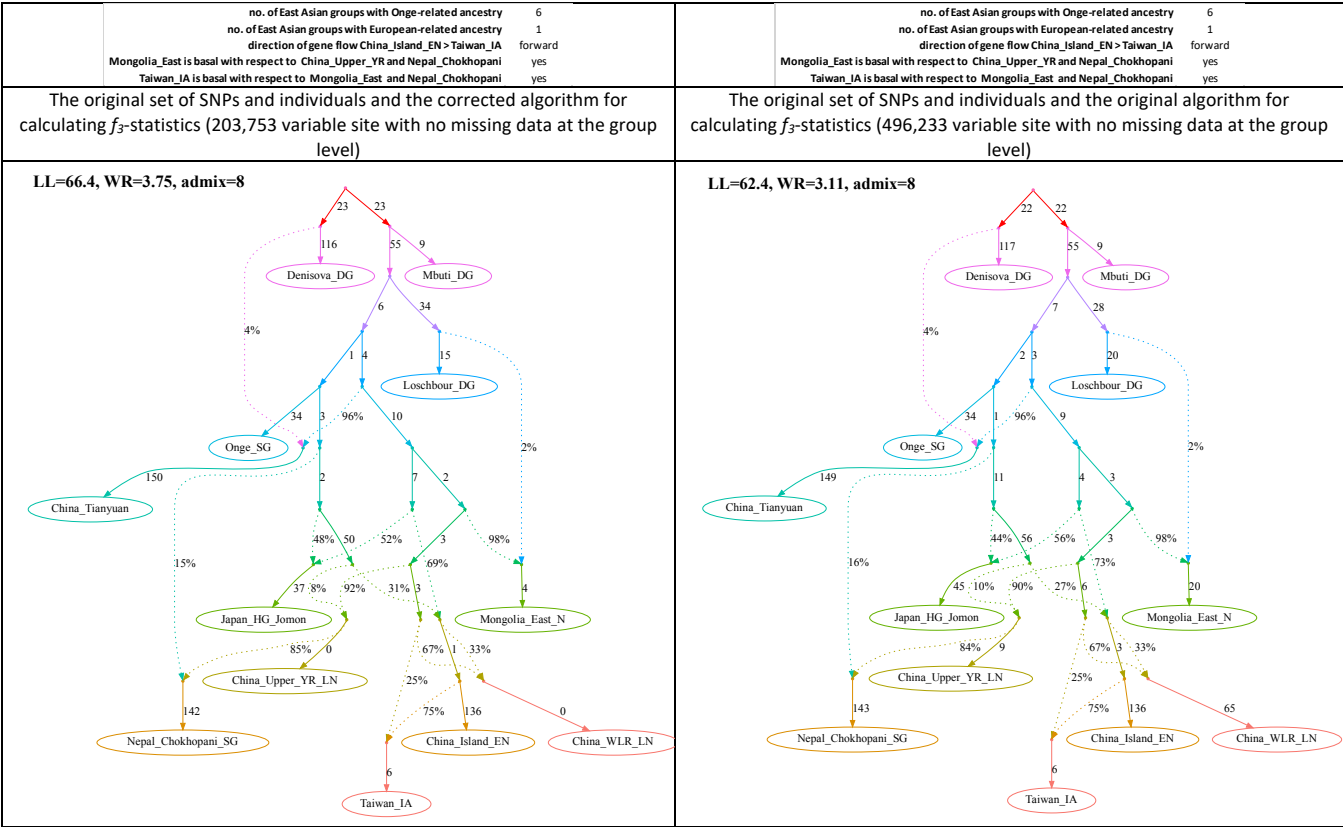

A claim by Wang et al. 2021 relying on the admixture graph:

There is Onge-related admixture in the following lineages: Jomon (Japan\_HG\_Jomon), Tibetan (Nepal\_Chokhopani\_SG), Upper Yellow River Late Neolithic (China\_Upper\_YR\_LN), West Liao River Late Neolithic (China\_WLR\_LN), Taiwan Iron Age (Taiwan\_IA), China Island Early Neolithic (Liangdao, China\_Island\_EN).

Figure S11

c, alternative models fitting significantly better than the published one

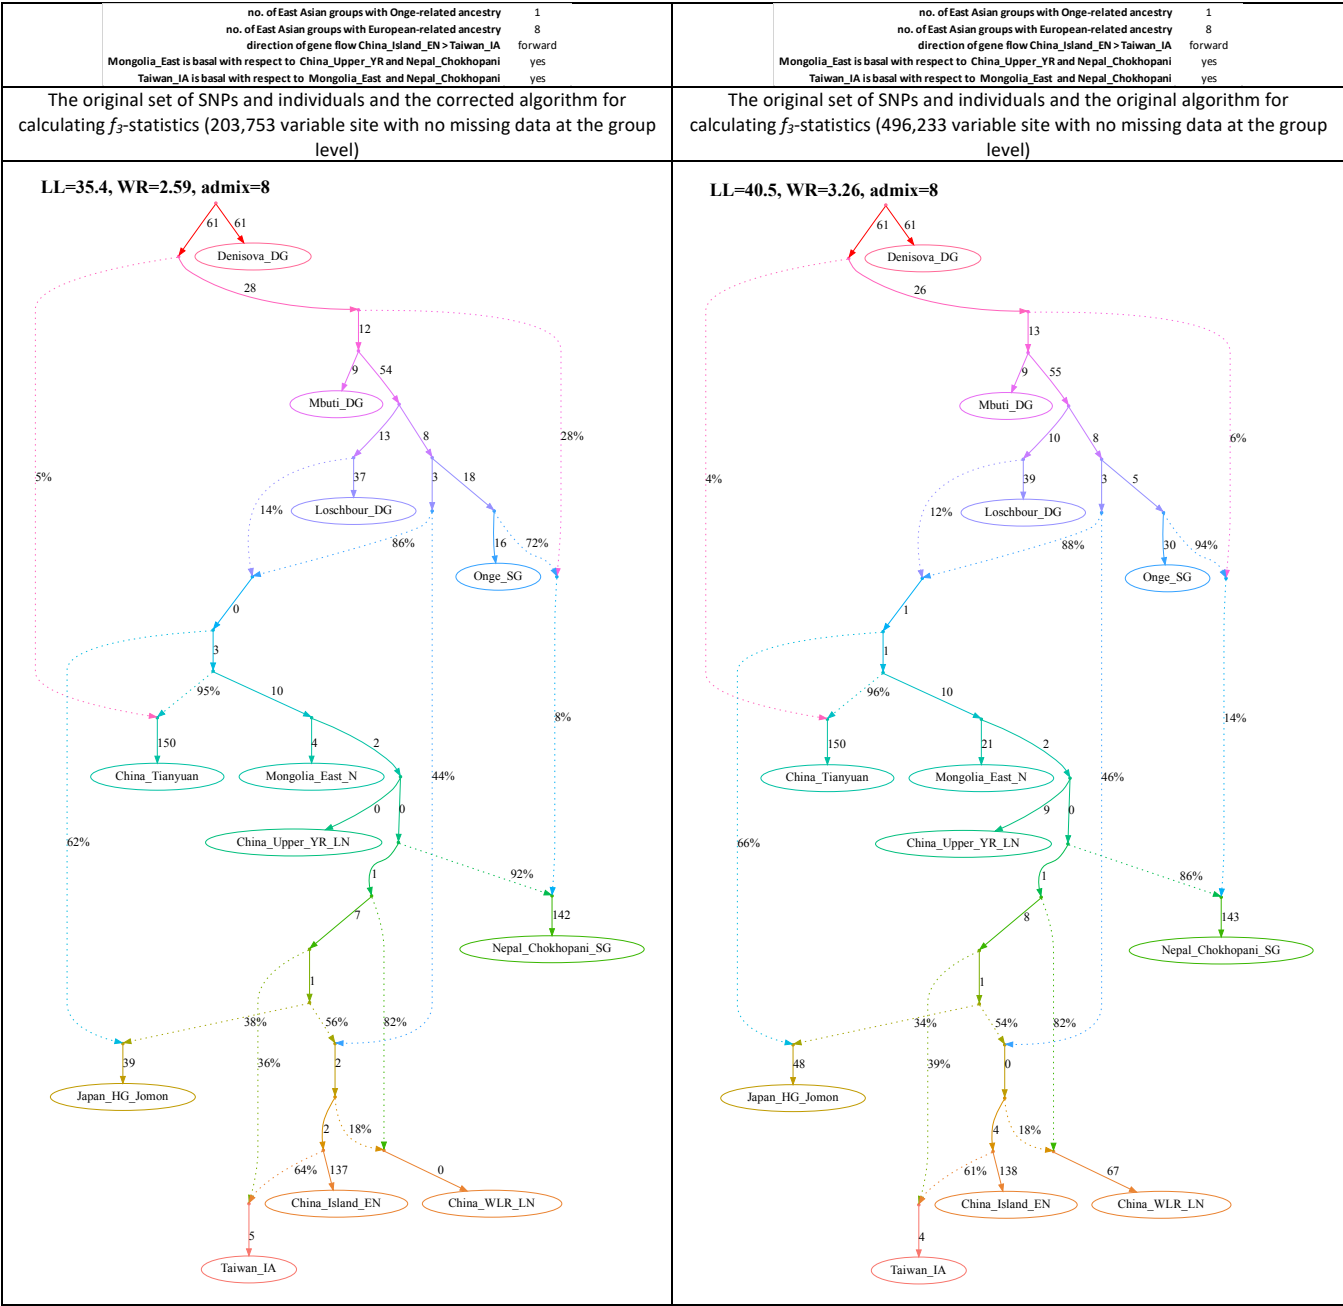

Figure S11

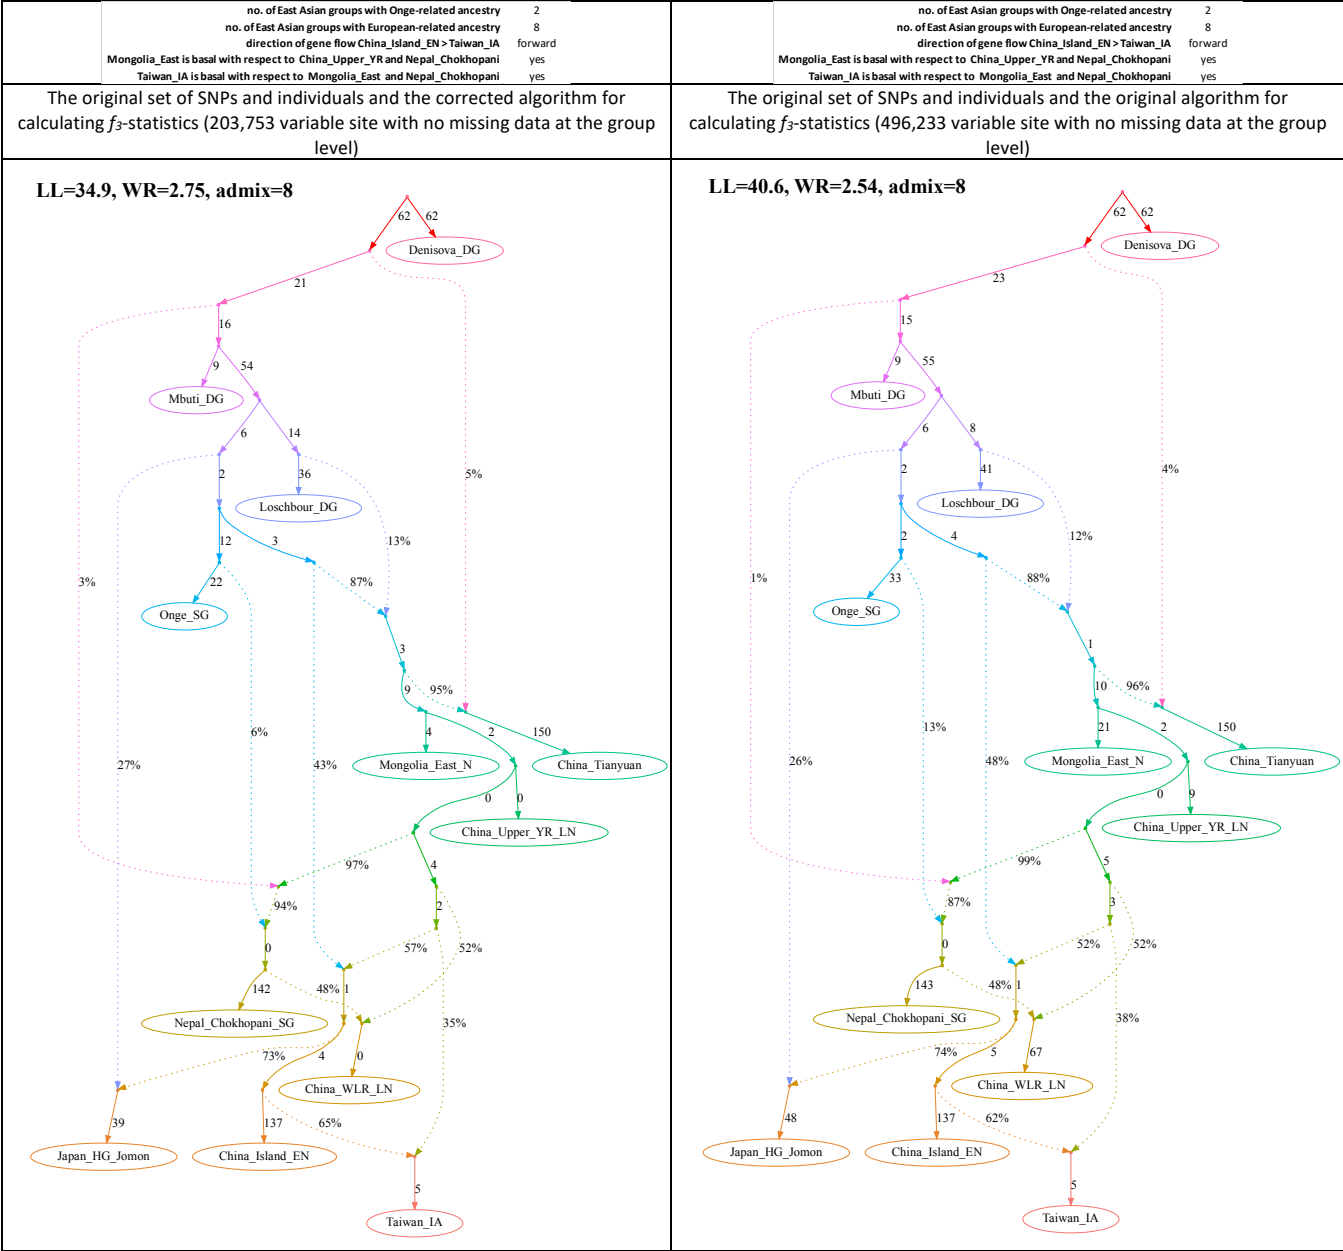

**d**, alternative models fitting significantly better than the published one

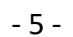

Figure S11

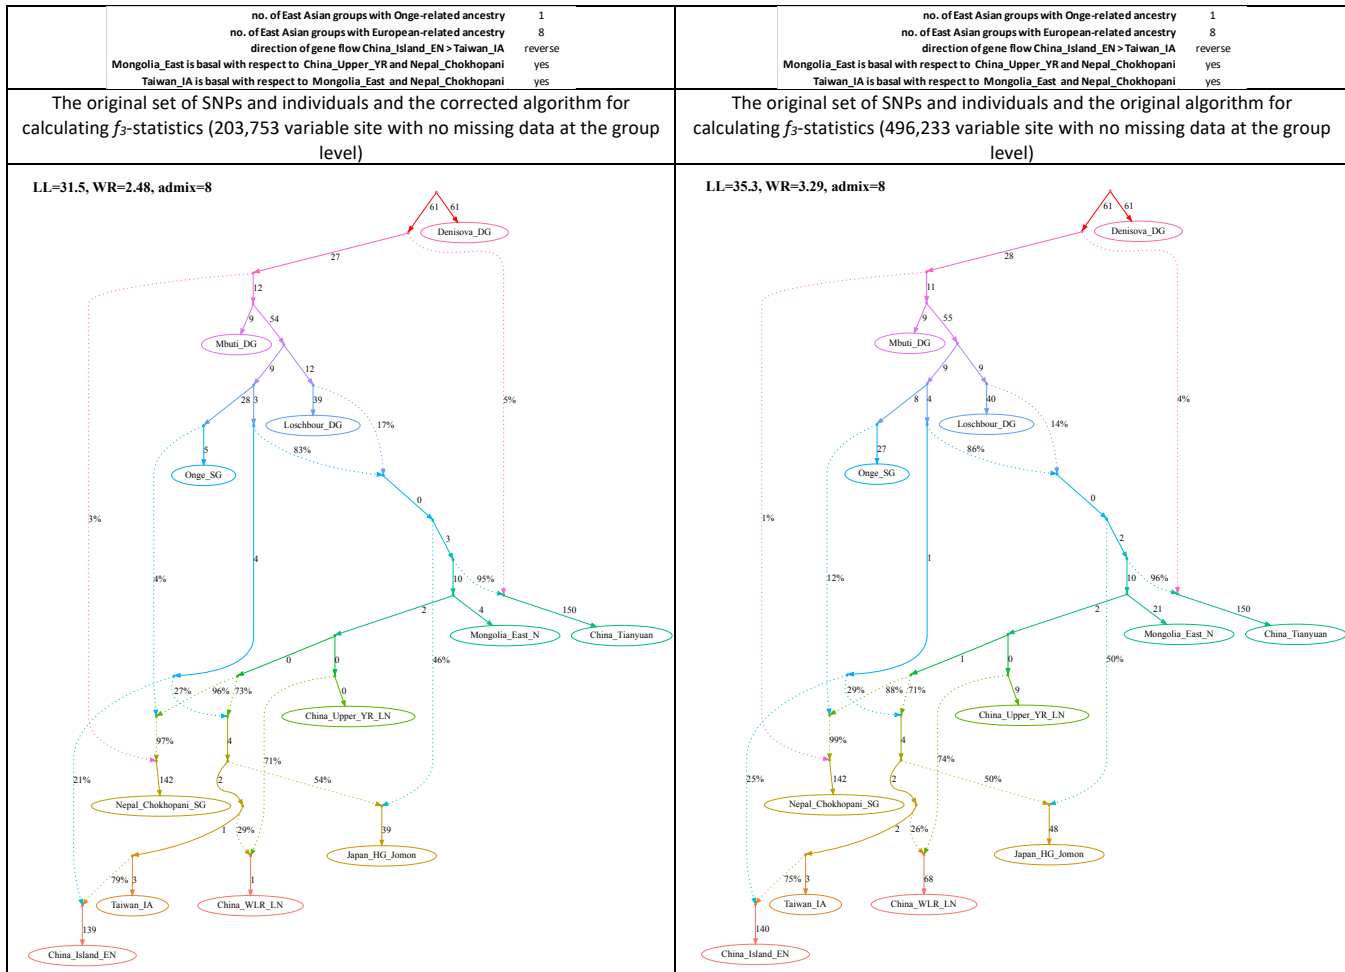

Figure S11

e, alternative models fitting significantly better than the published one

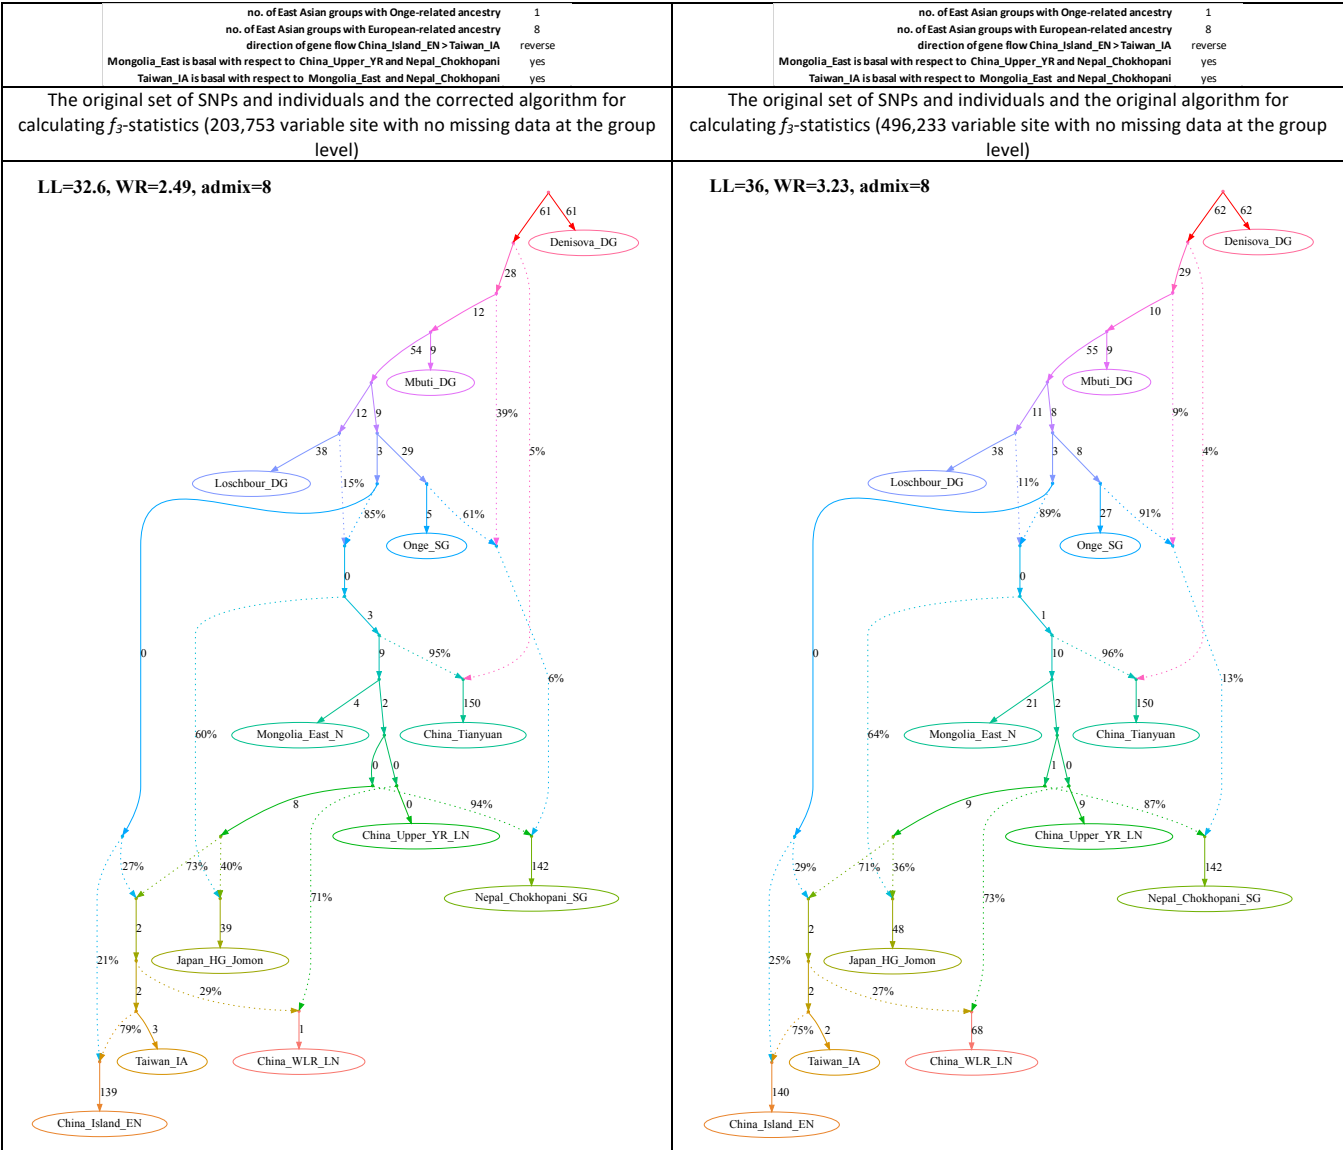

Figure S11

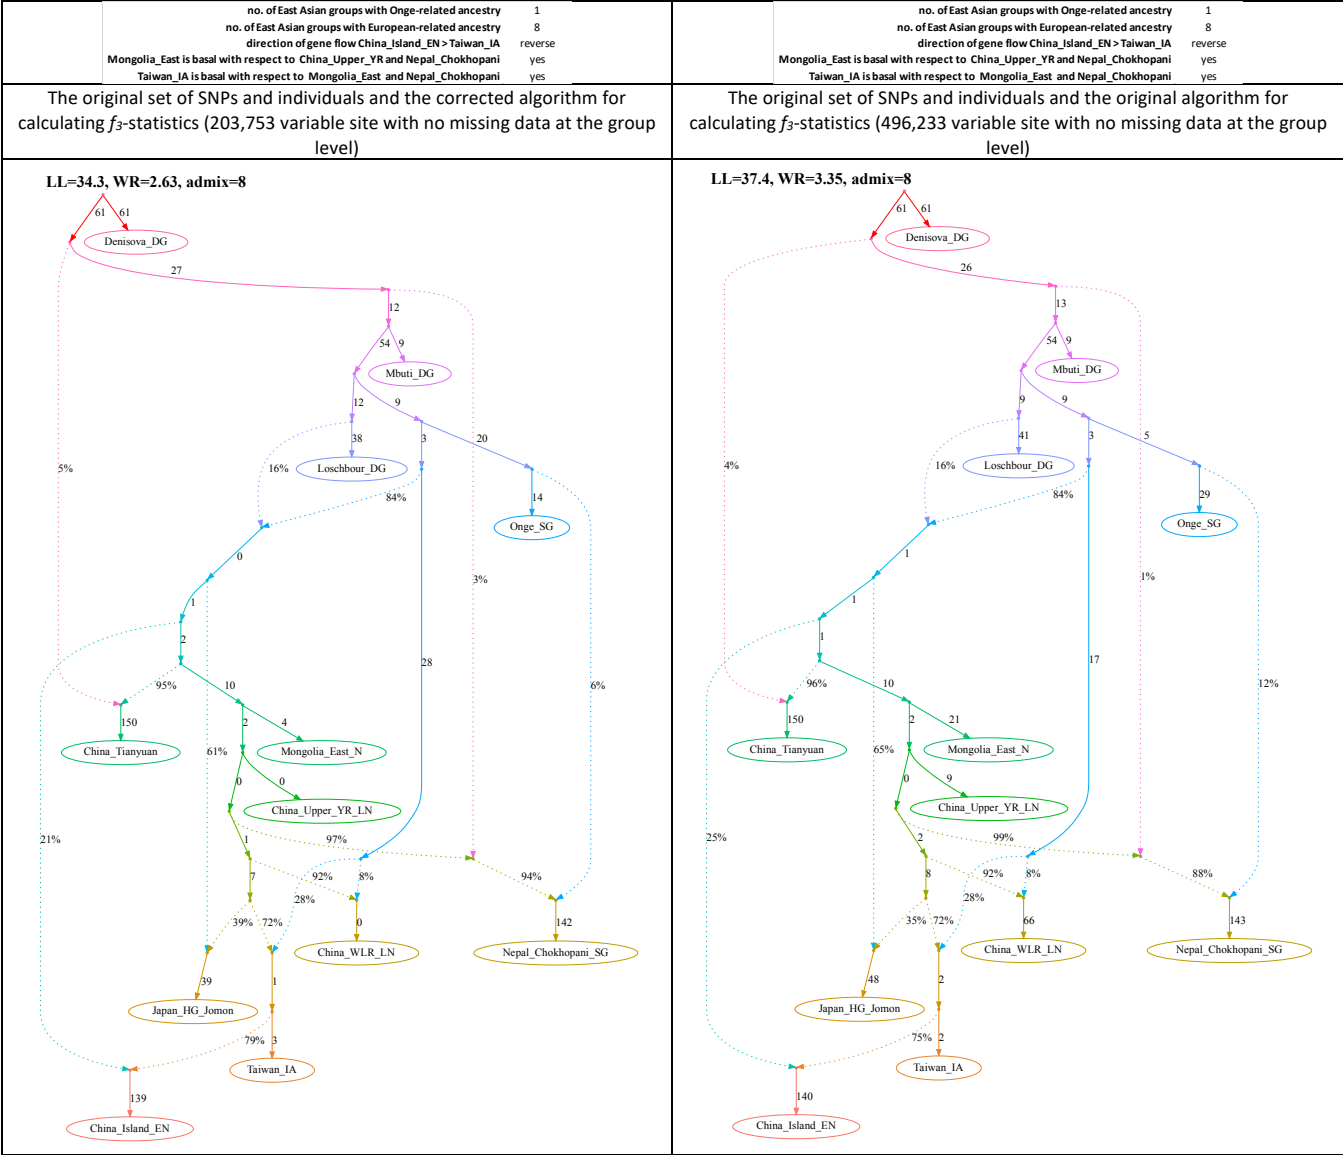



Figure S11

**f**, alternative models fitting significantly better than the published one

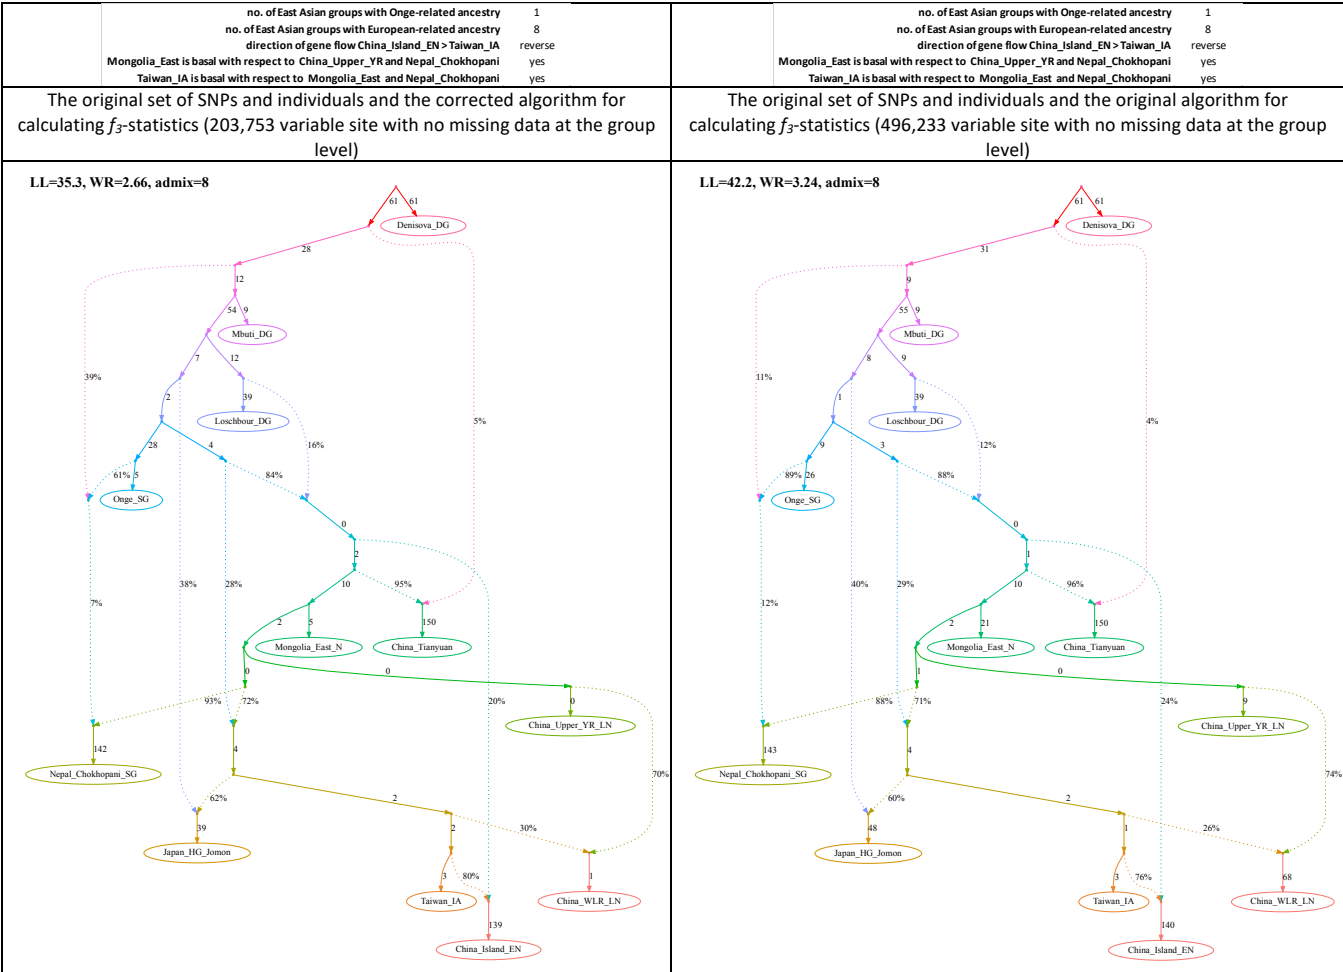

Figure S11

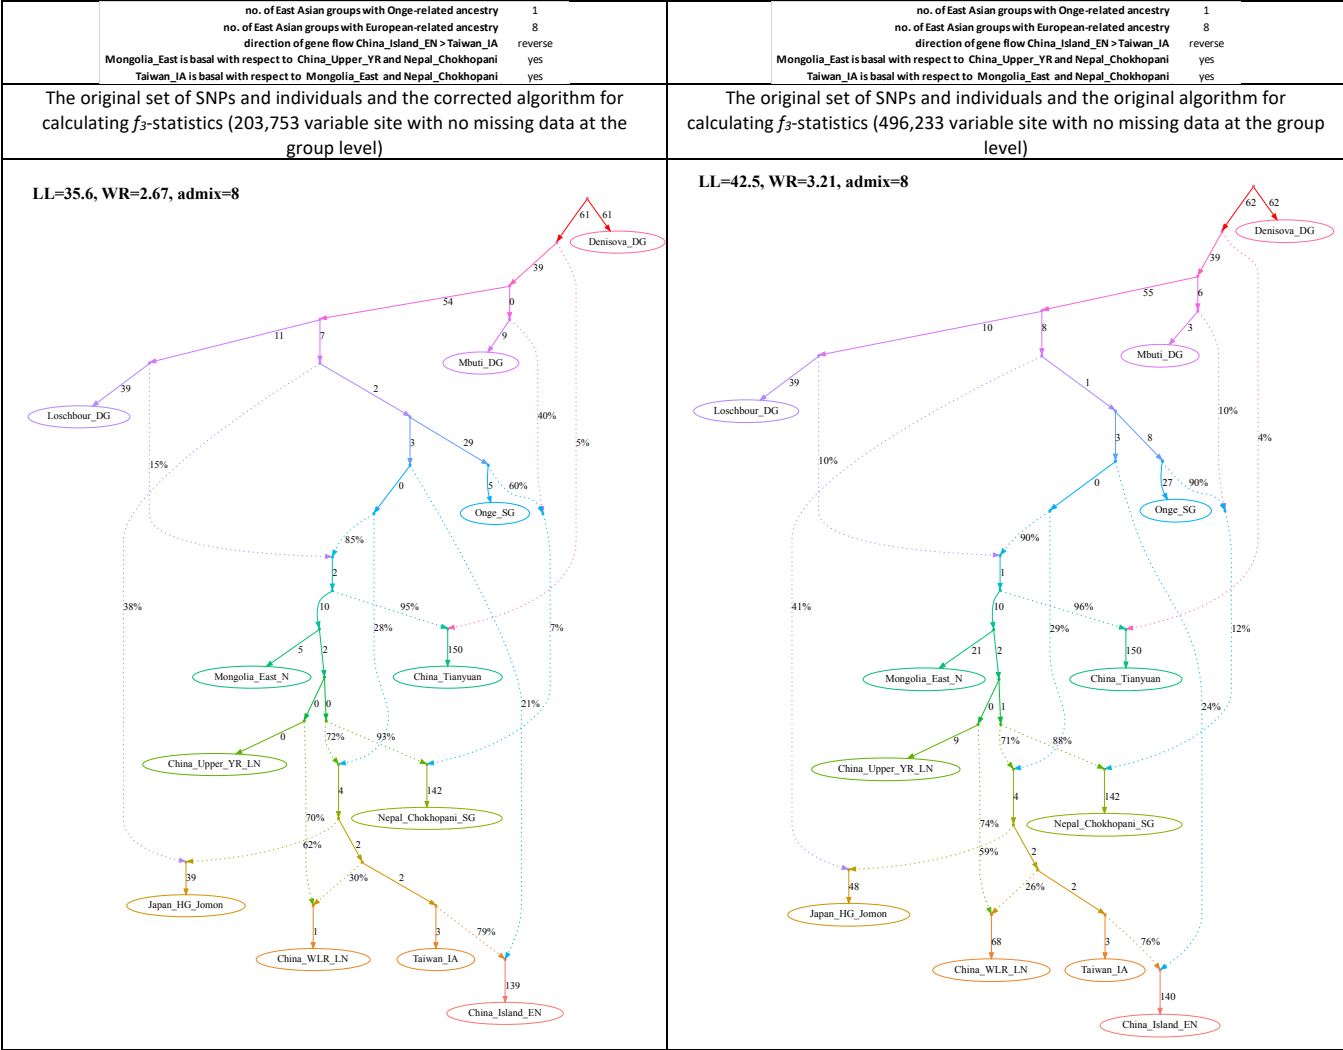

Figure S11

**g**, alternative models fitting significantly better than the published one

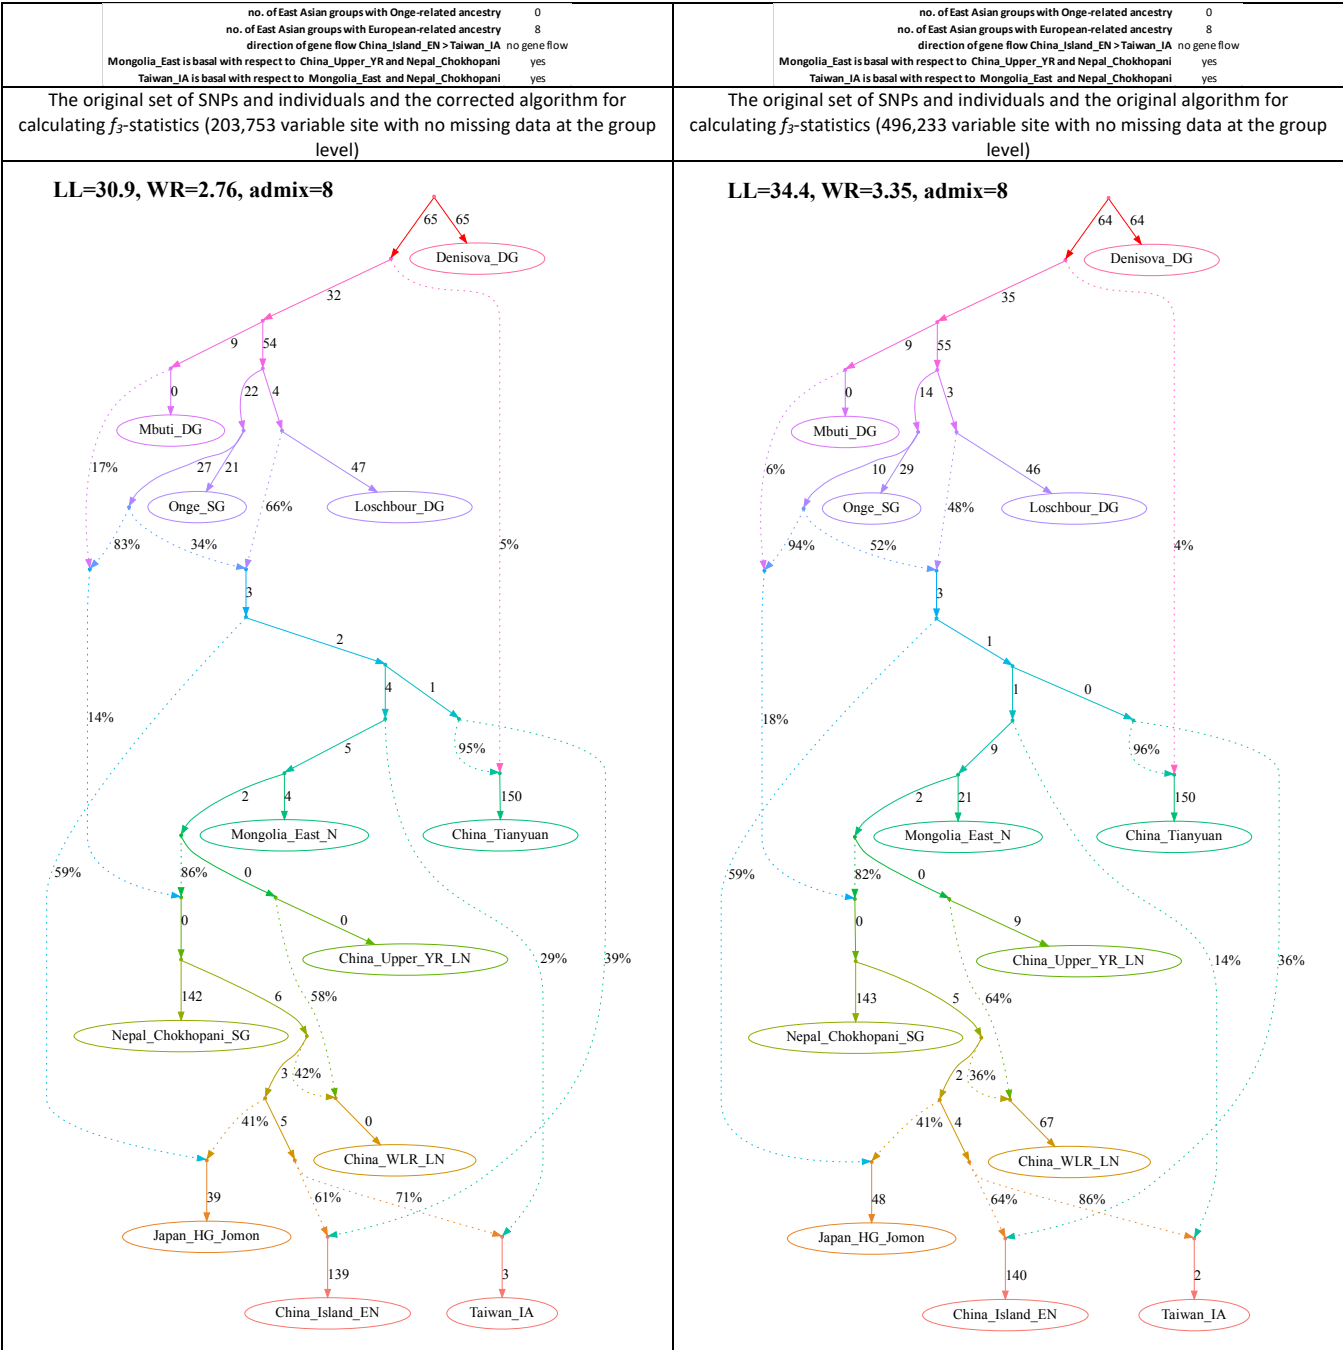

Figure S11

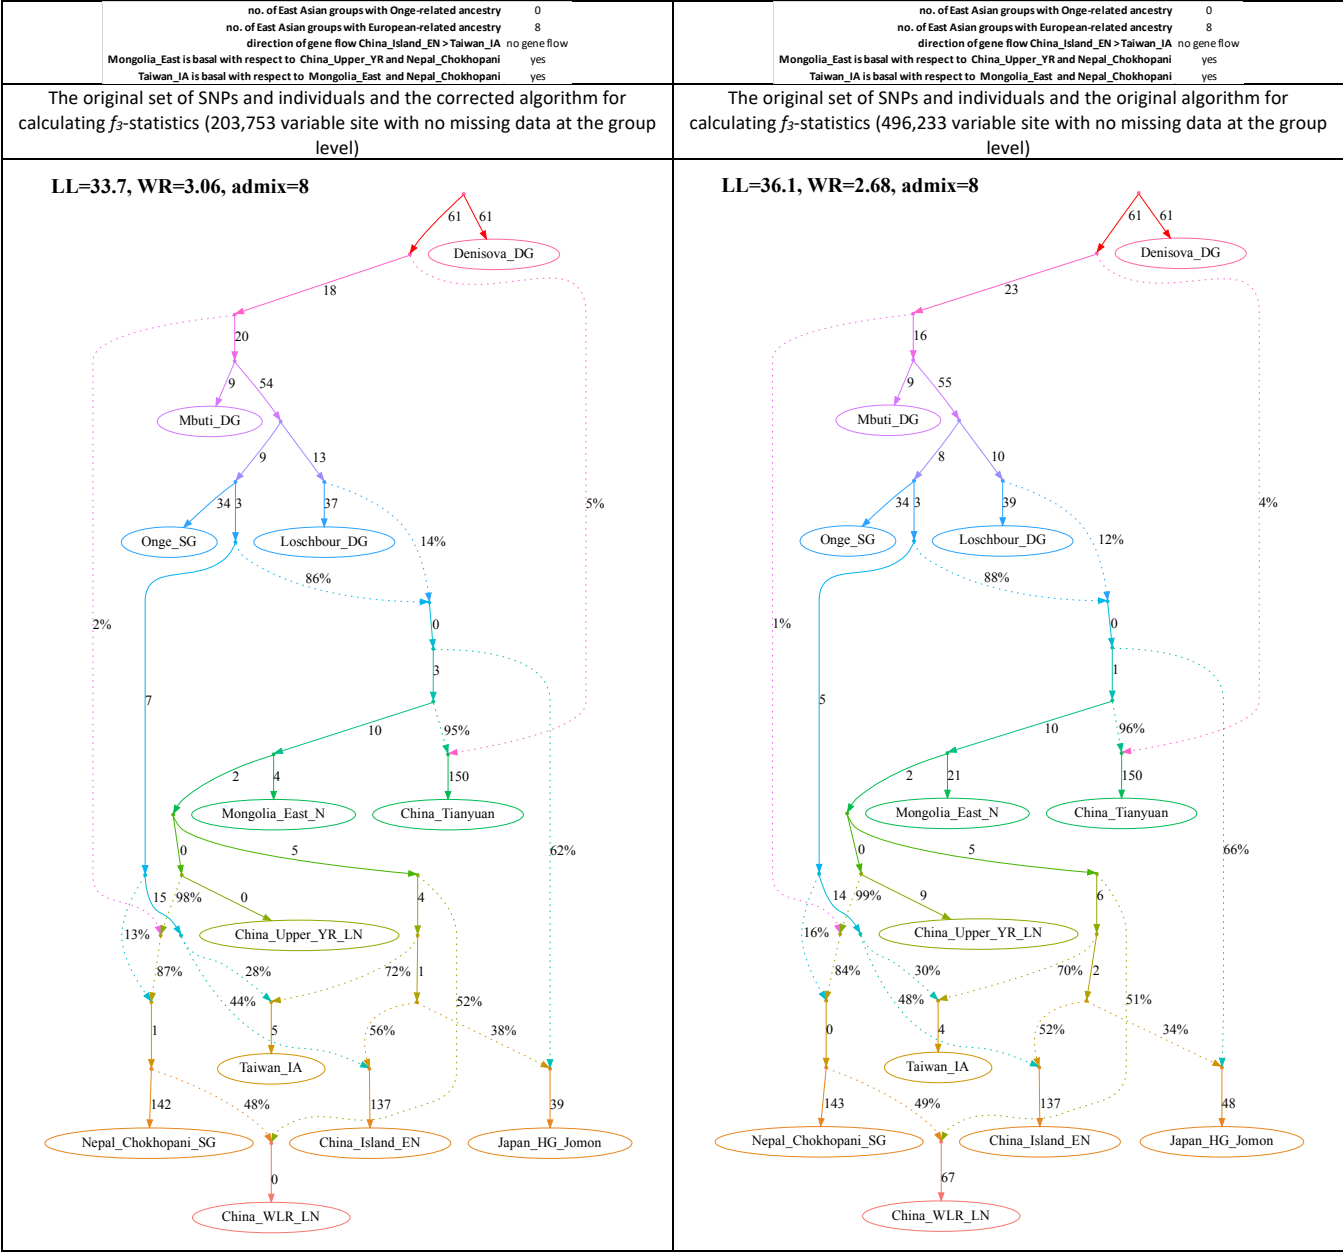

Figure S11

h, alternative models fitting significantly better than the published one

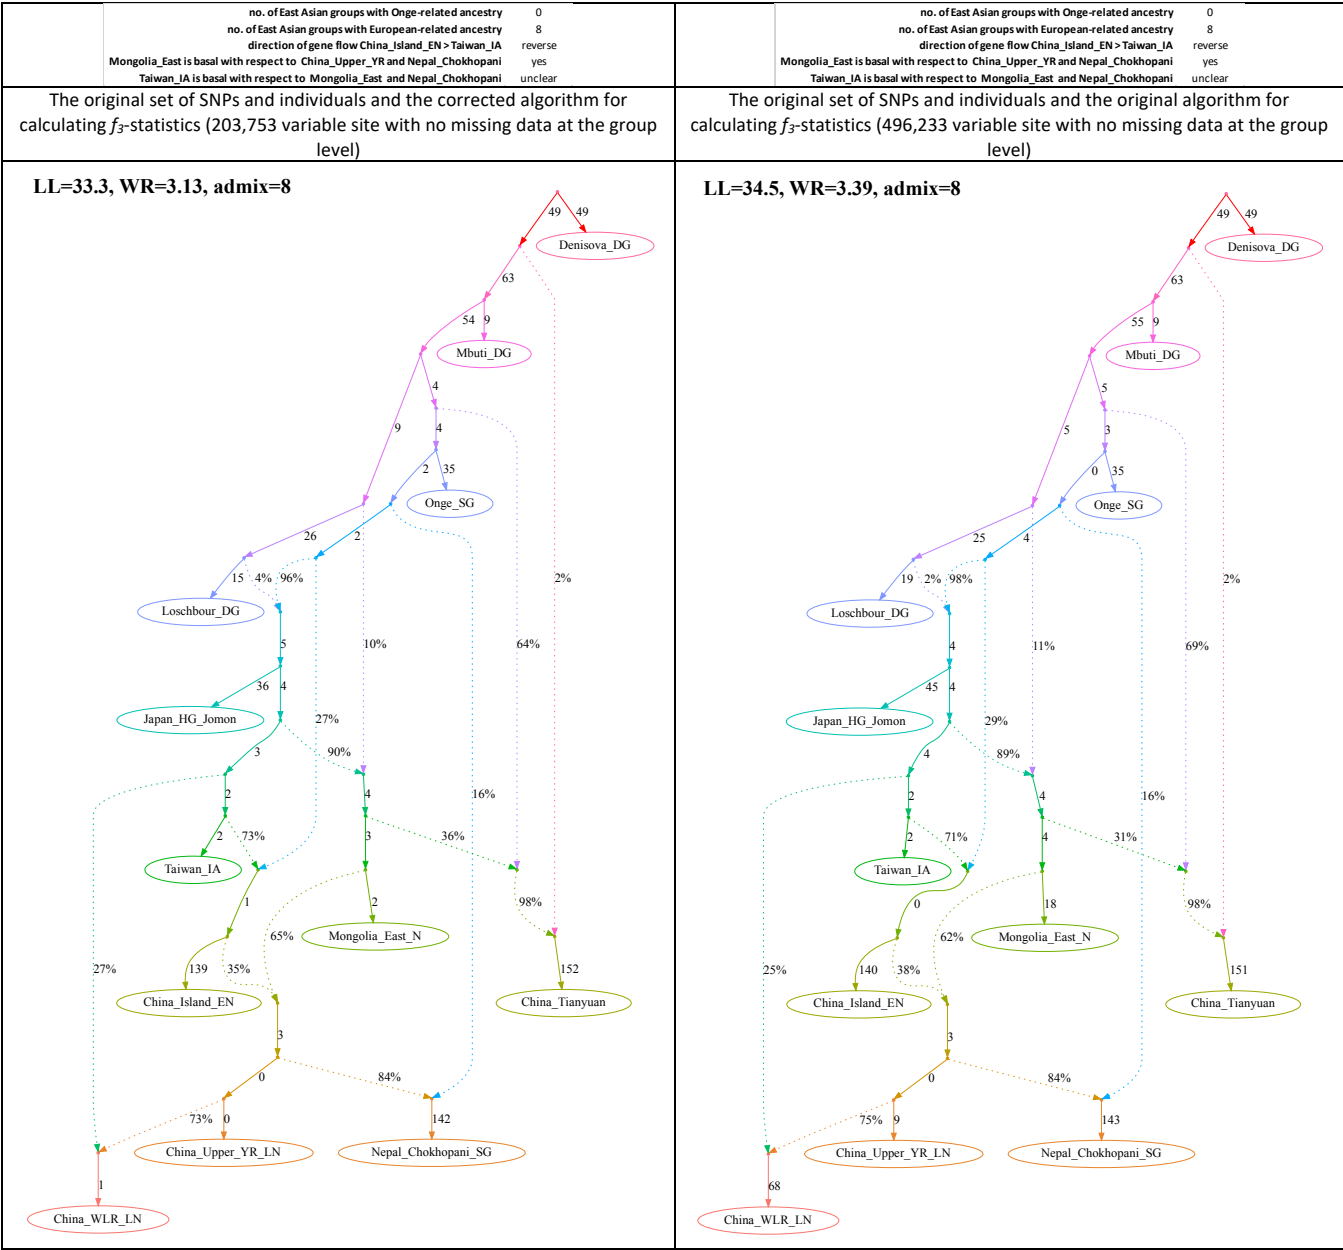

Figure S11

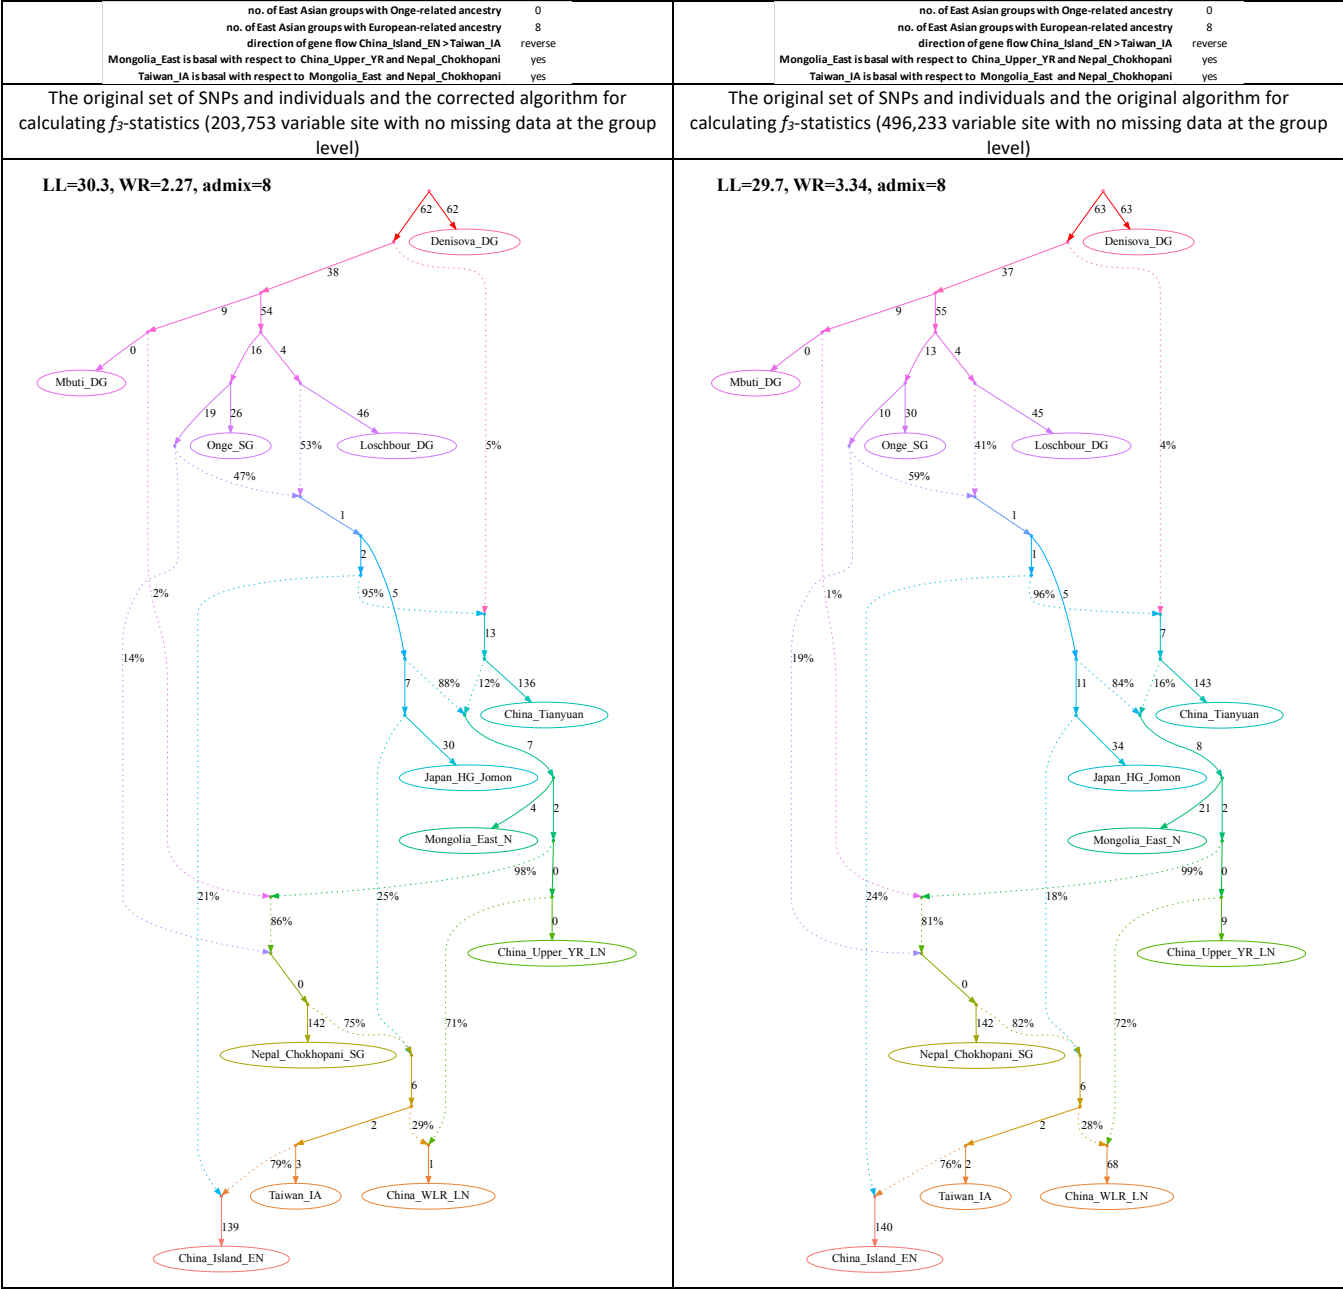

Figure S11

i, alternative models fitting significantly better than the published one

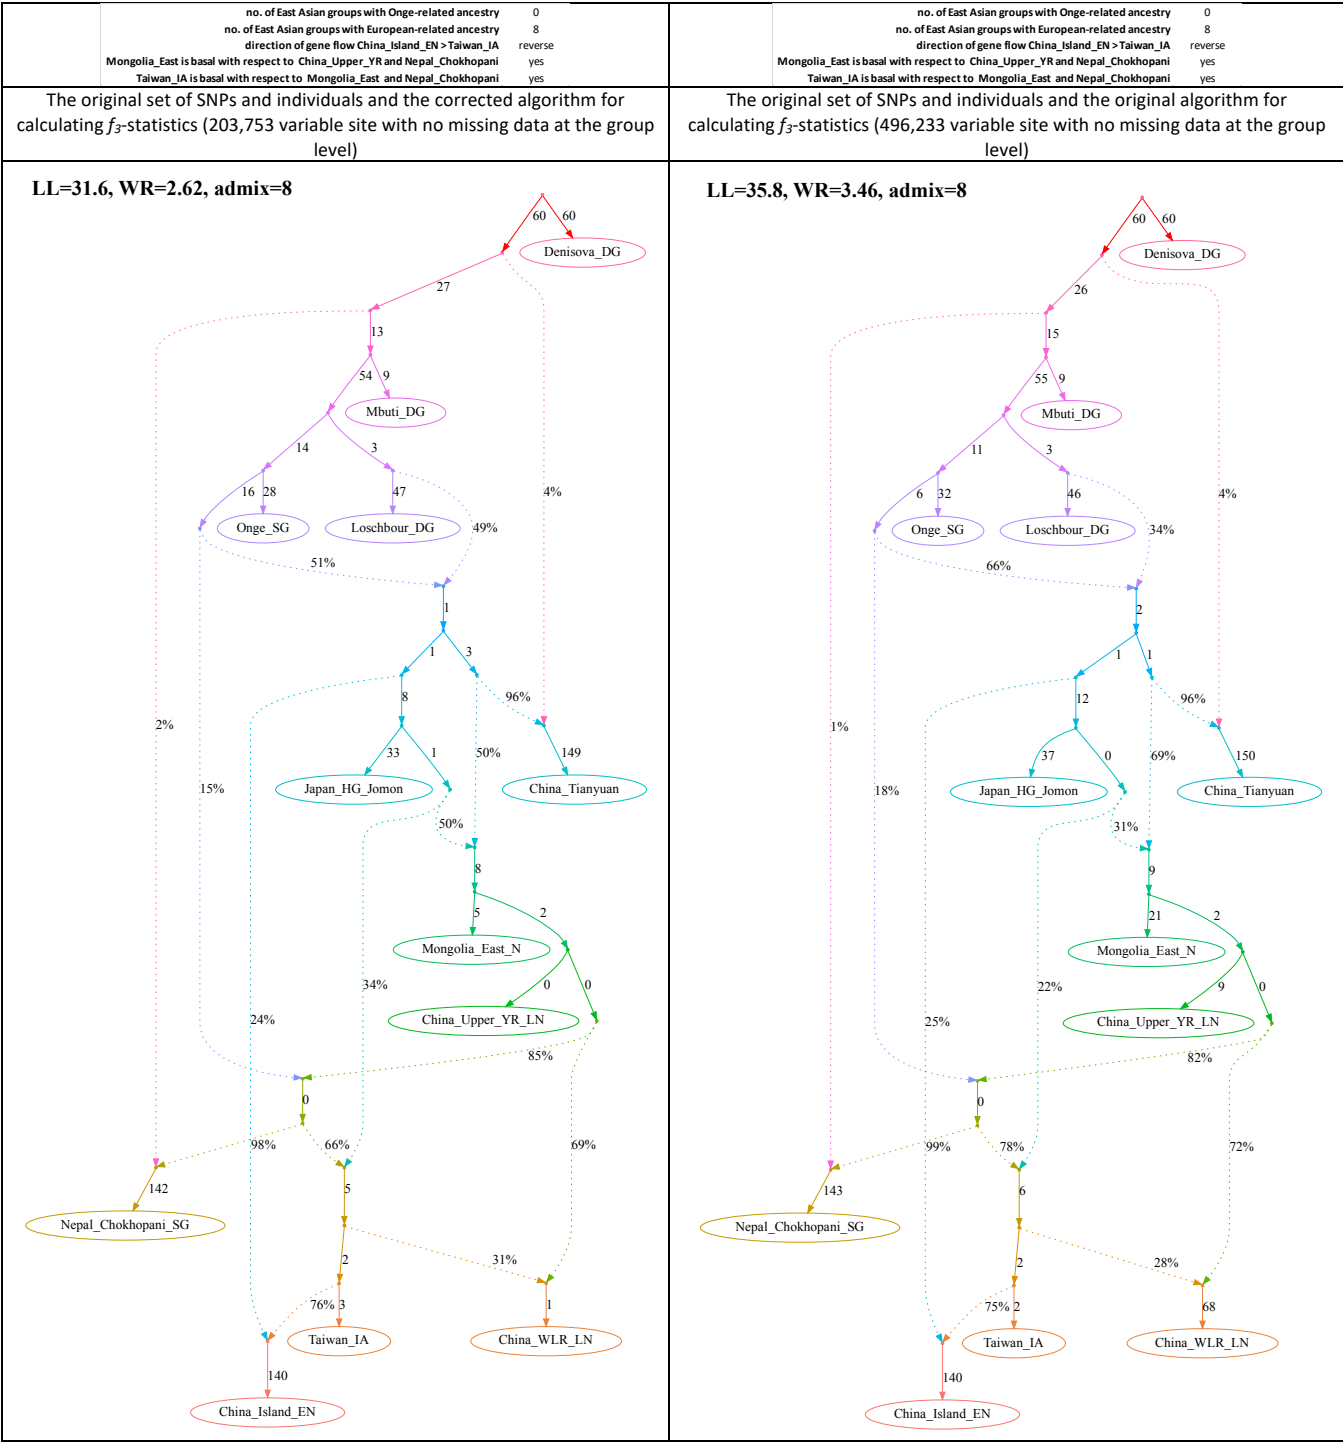

Figure S11

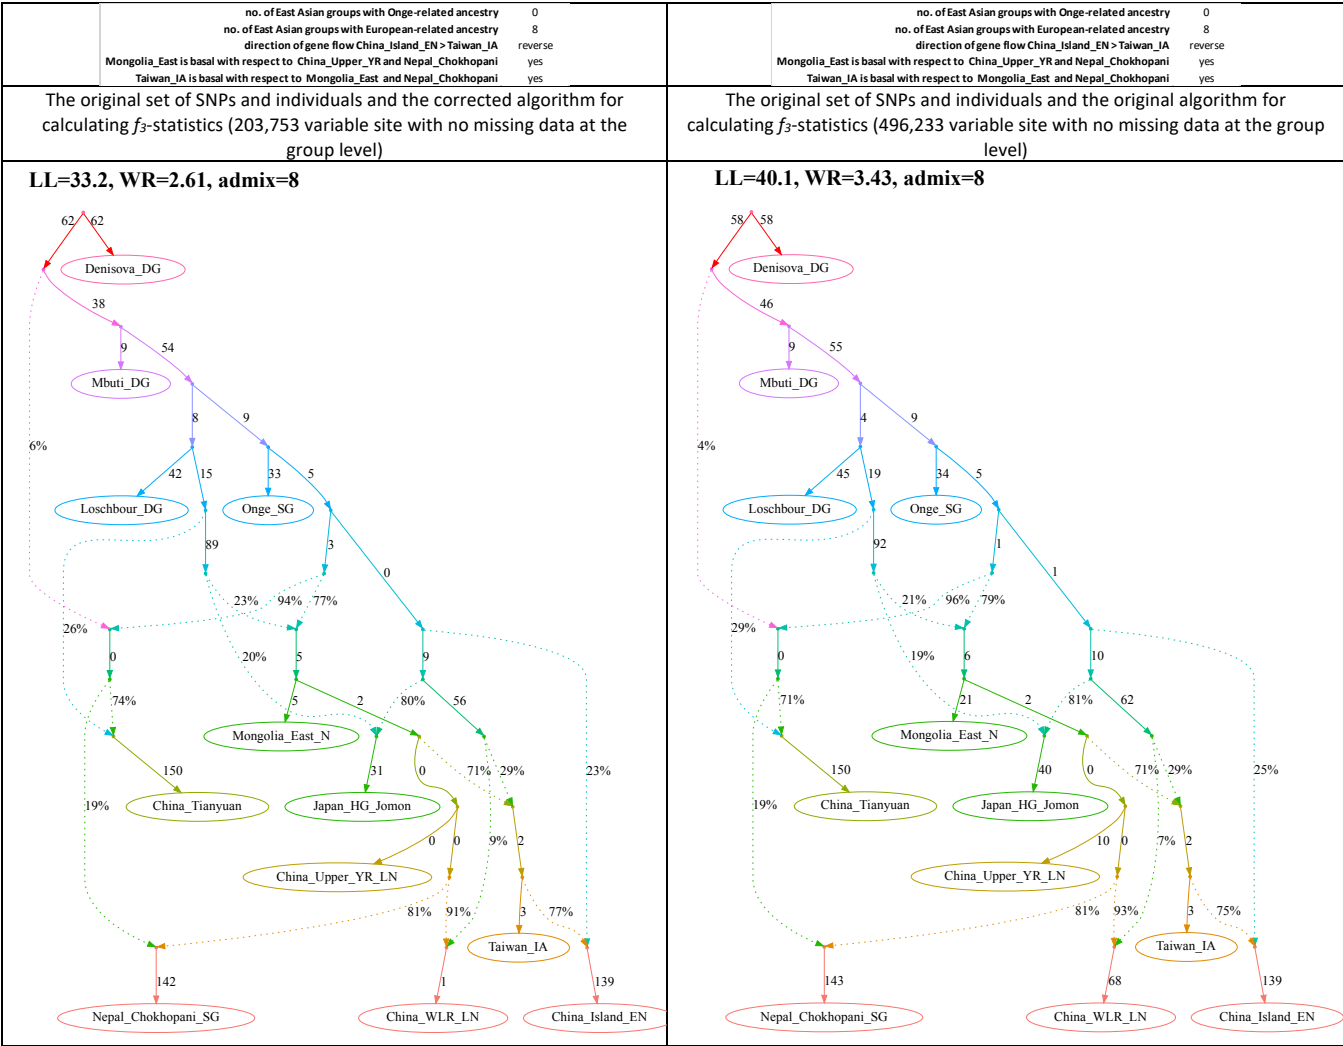



Figure S11

j, alternative models fitting significantly better than the published one

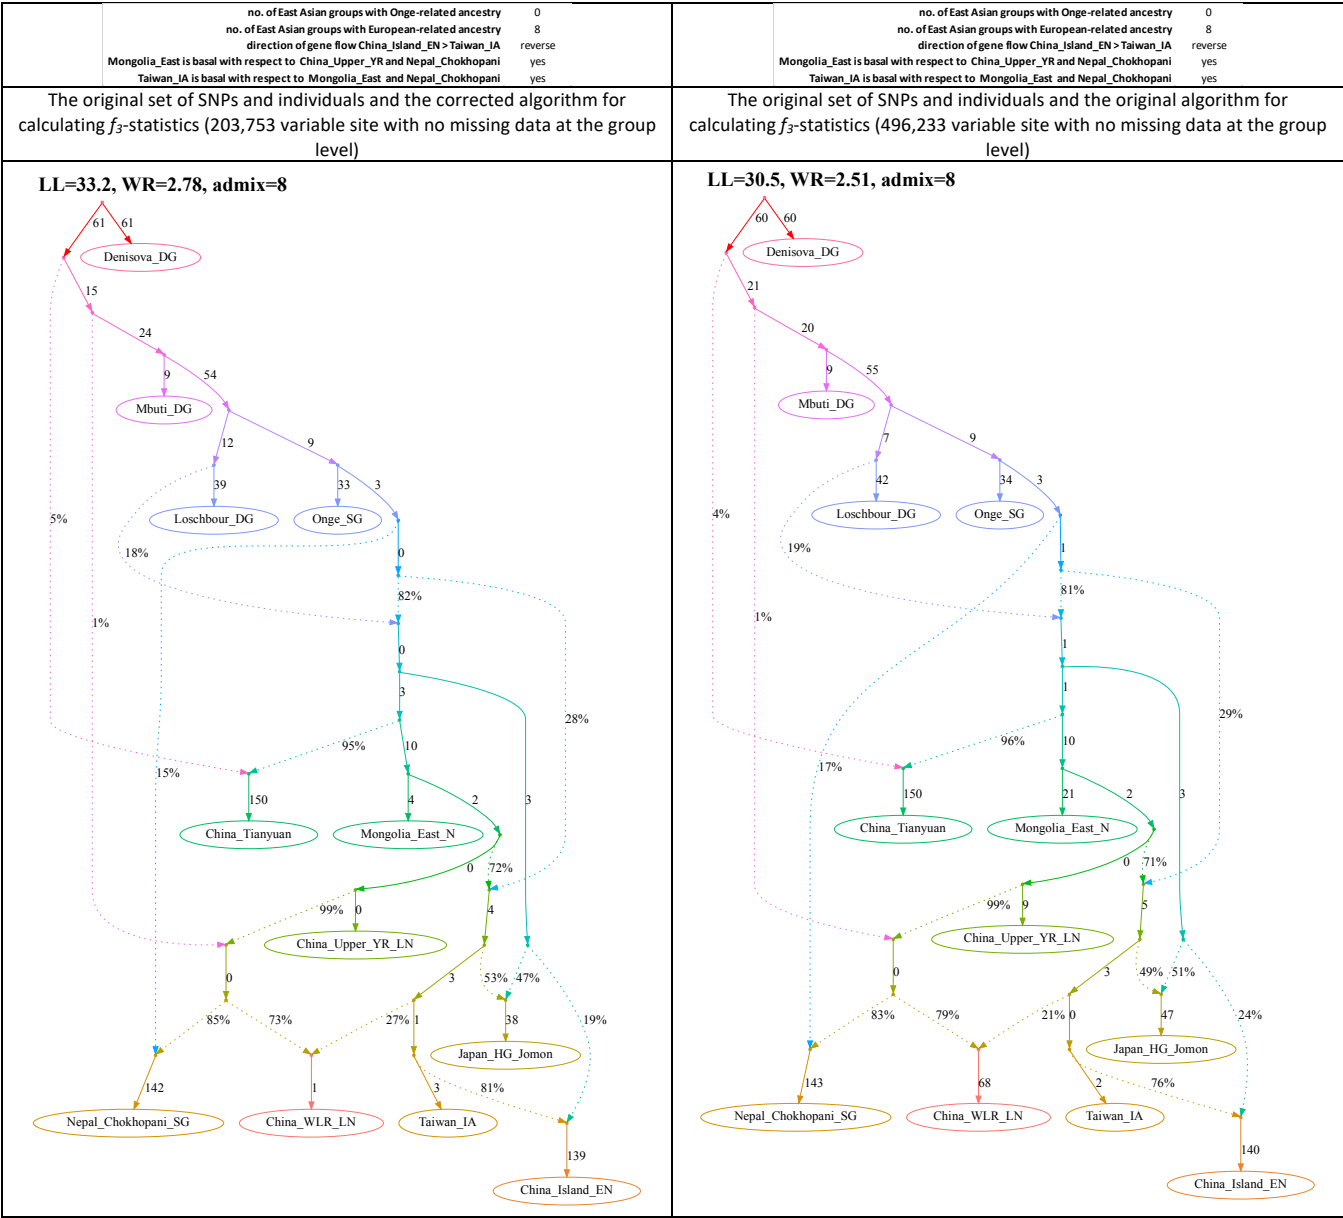

Figure S11

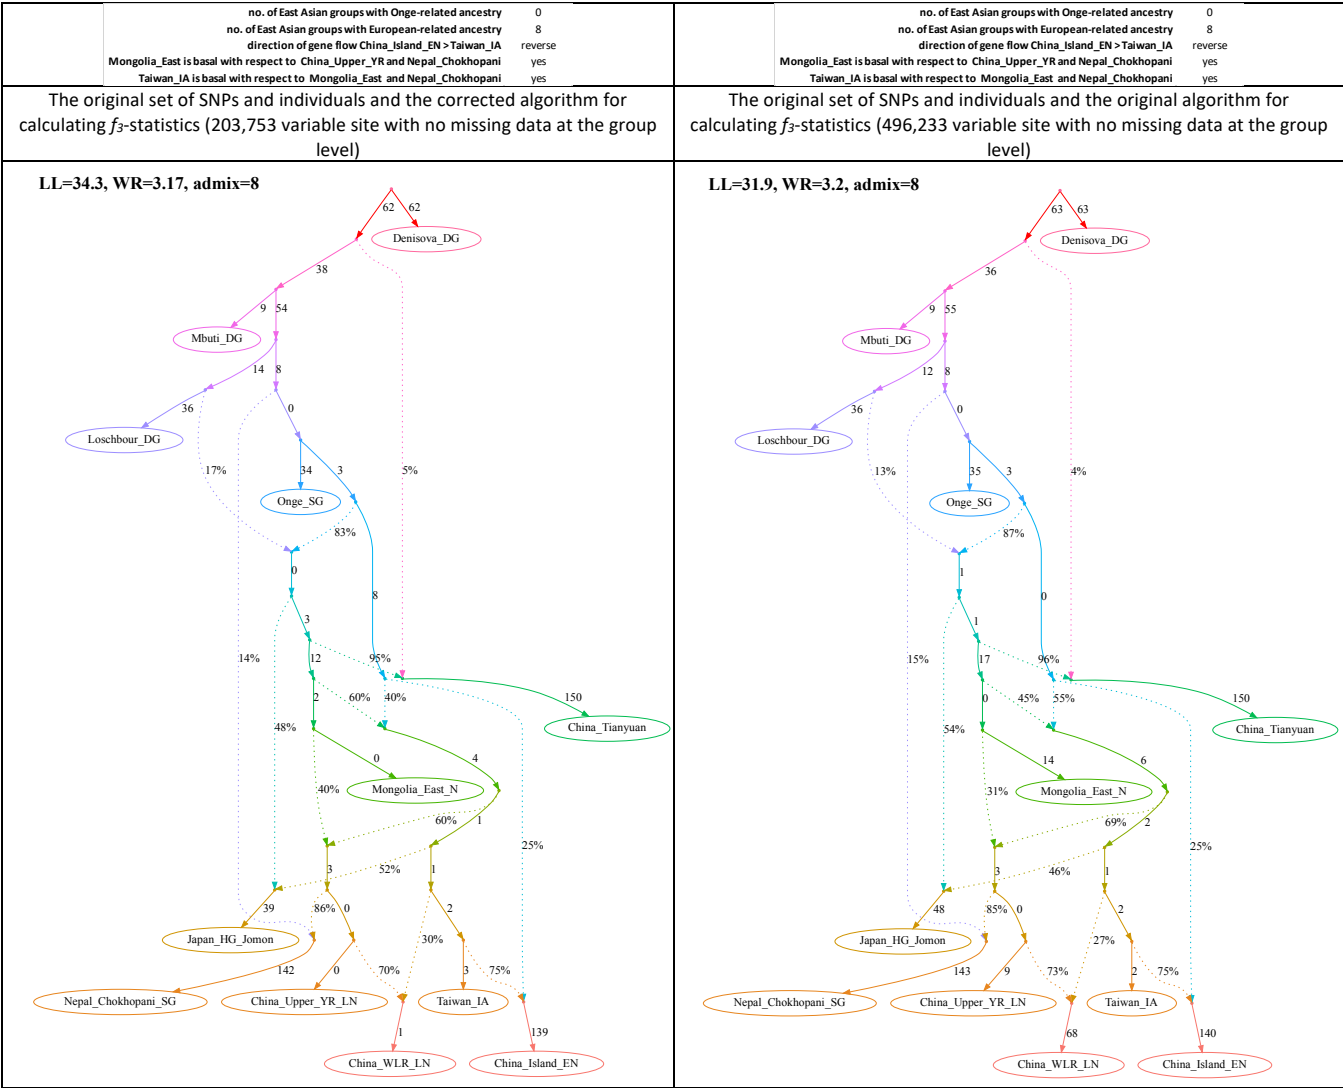

Figure S11

k, alternative models fitting significantly better than the published one

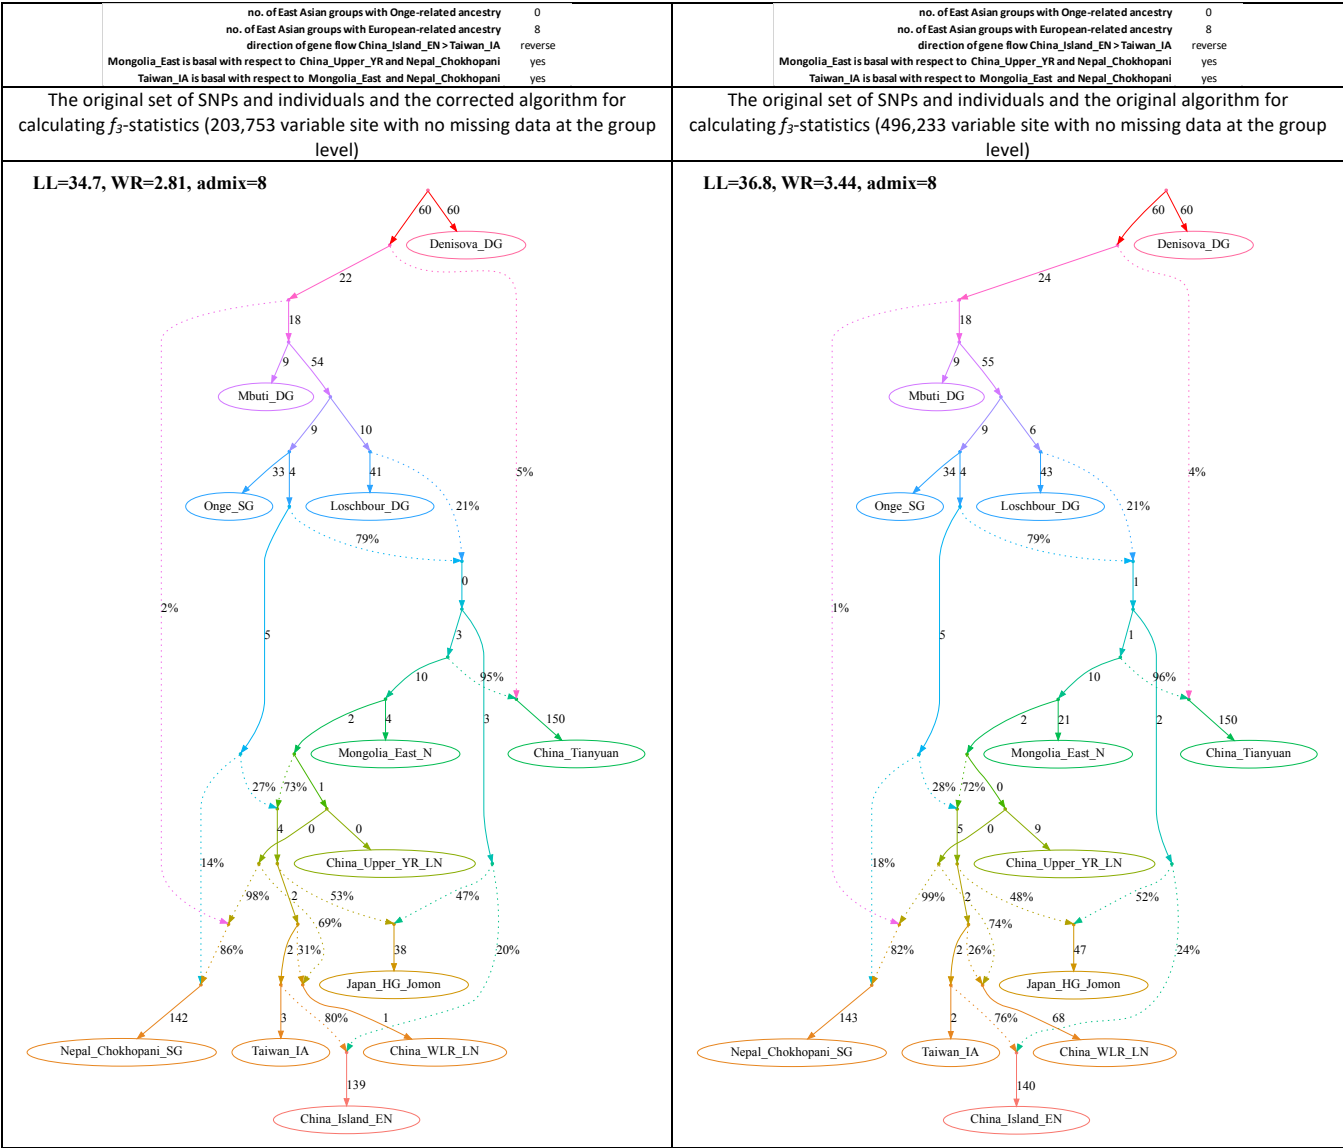

Figure S11

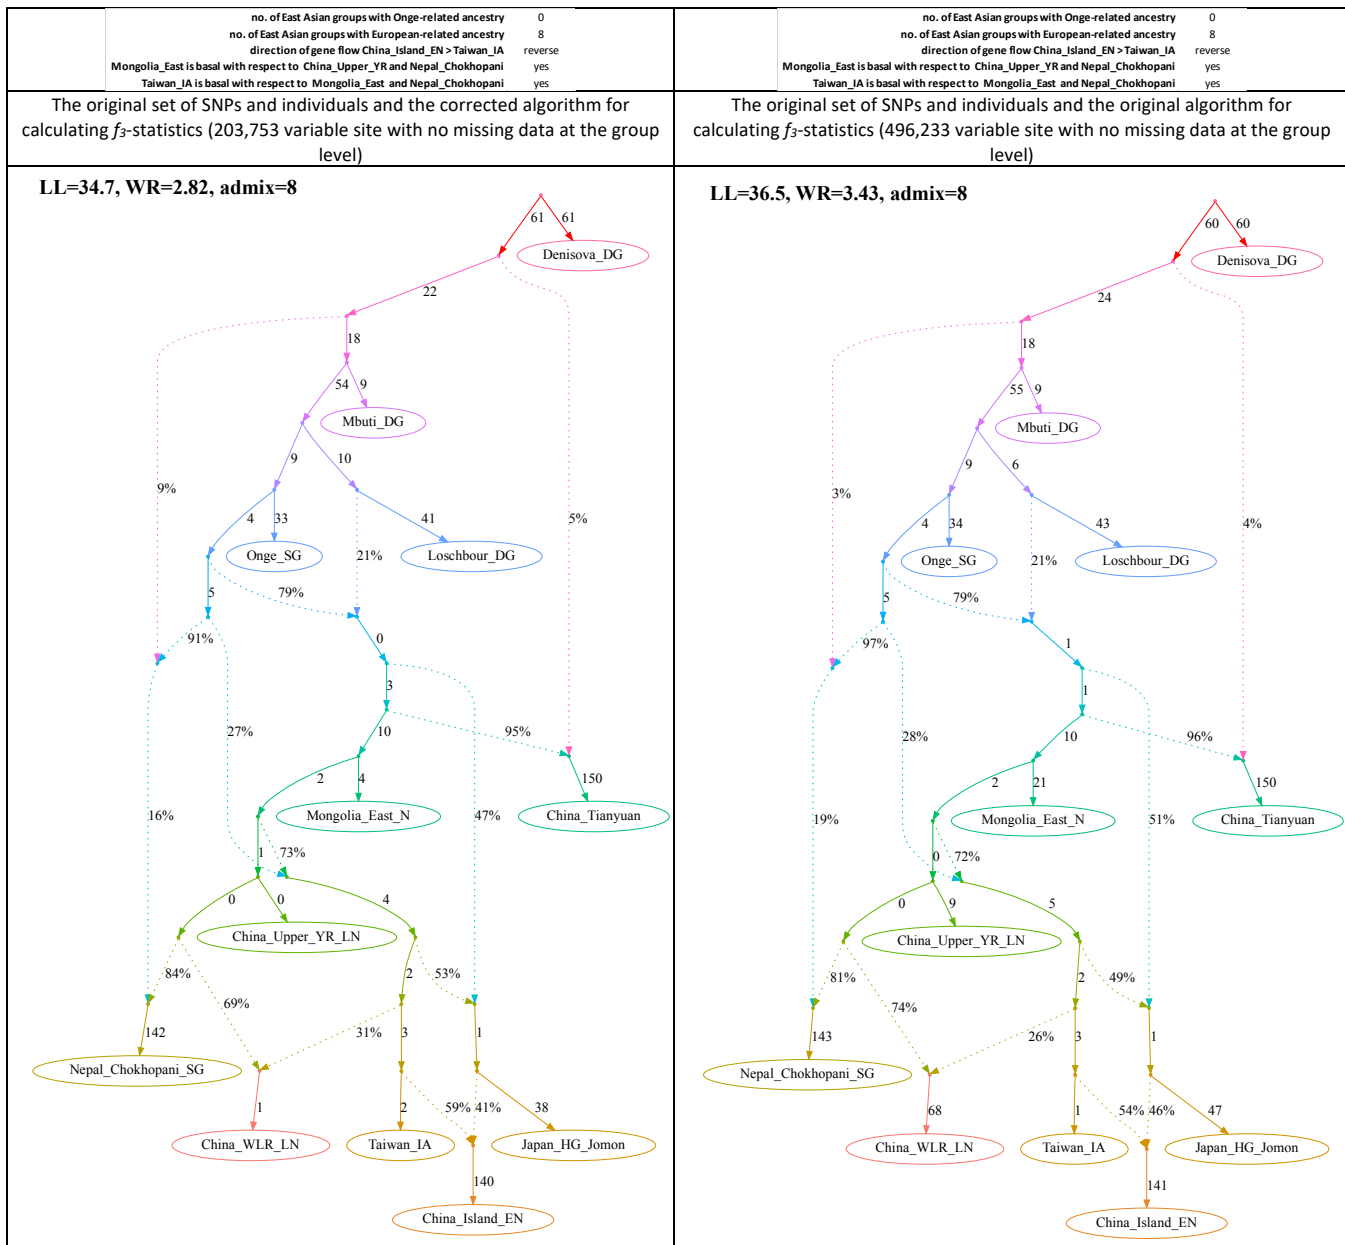

I, alternative models fitting significantly better than the published one

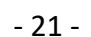

Figure S11

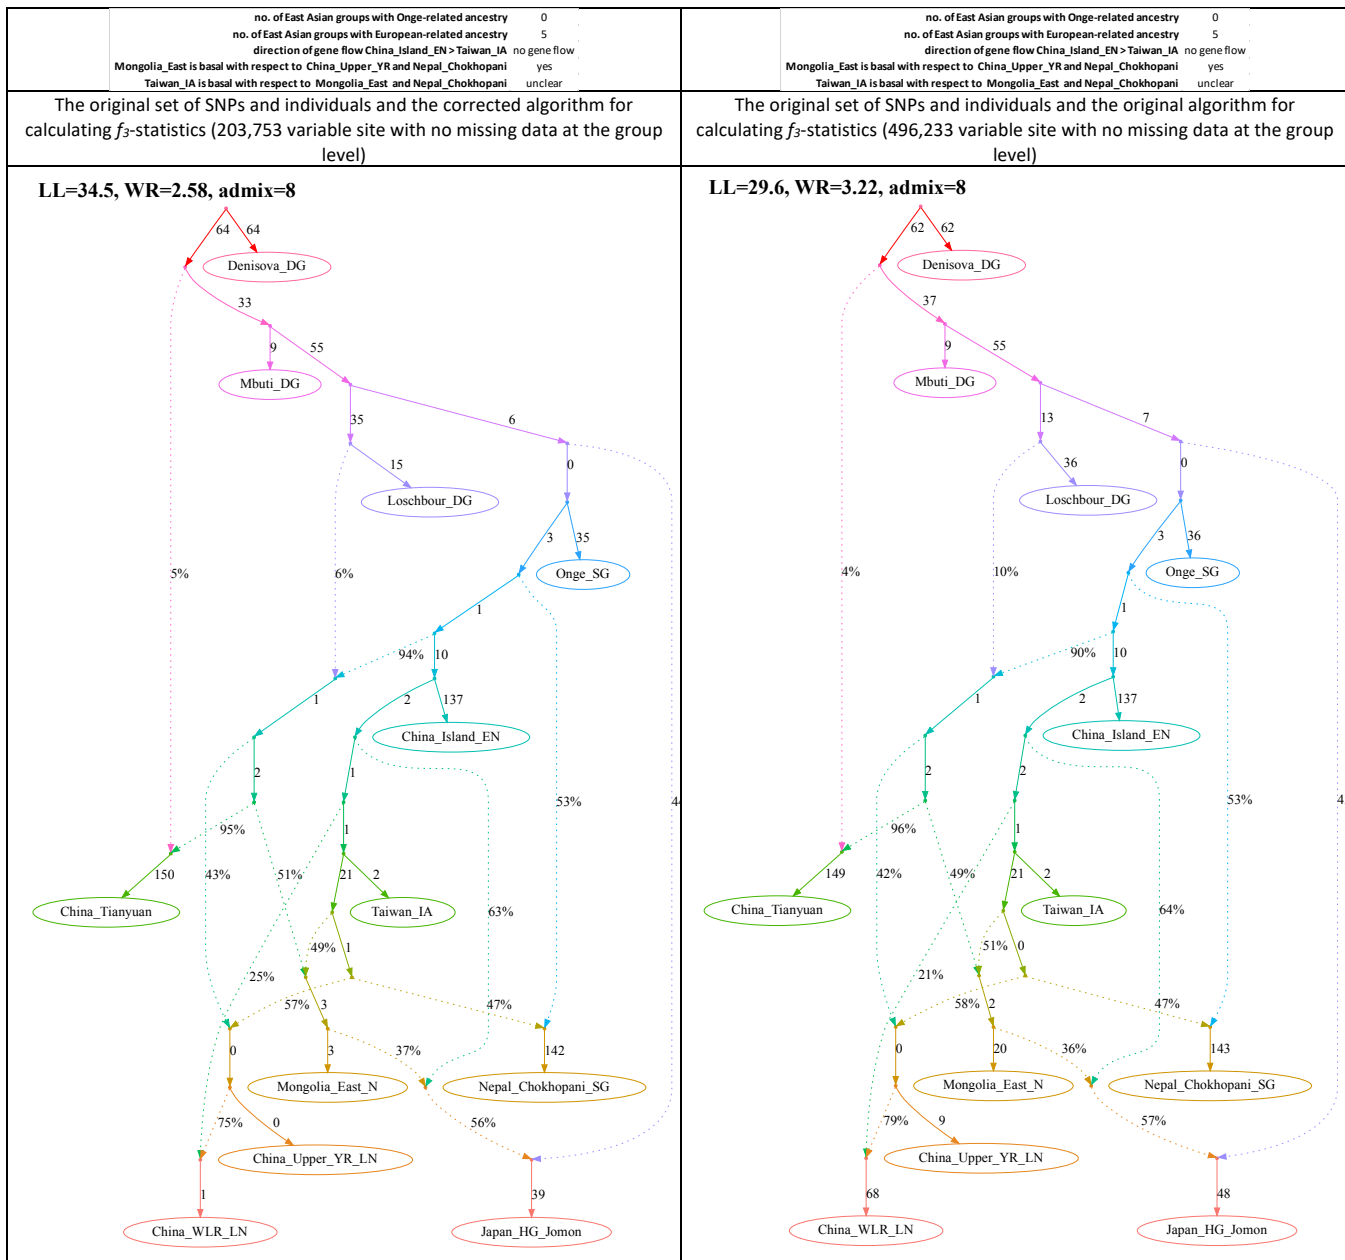

Supplement: supp [file elife-85492-supp-v1.zip]
