# Supplementary material for: On the limits of fitting complex models of population history to f-statistics
Source: PubMed Central journal article supplement (PMC10310323; doi:10.7554/elife.85492), 2023-06-29

**Figure 4–source data 3.** Simplified published admixture graph for West Eurasian groups from Sikora *et al.* (2019) and alternative graphs found with *findGraphs* (13 populations, 6 admixture events). Model parameters (graph edges) that were inferred to be unidentifiable are plotted in red.

**a**, published model, with chimpanzee added as an outgroup and 4 low-level gene flows from the Neanderthal lineage dropped

LL=76.5, WR=3.78, admix=6

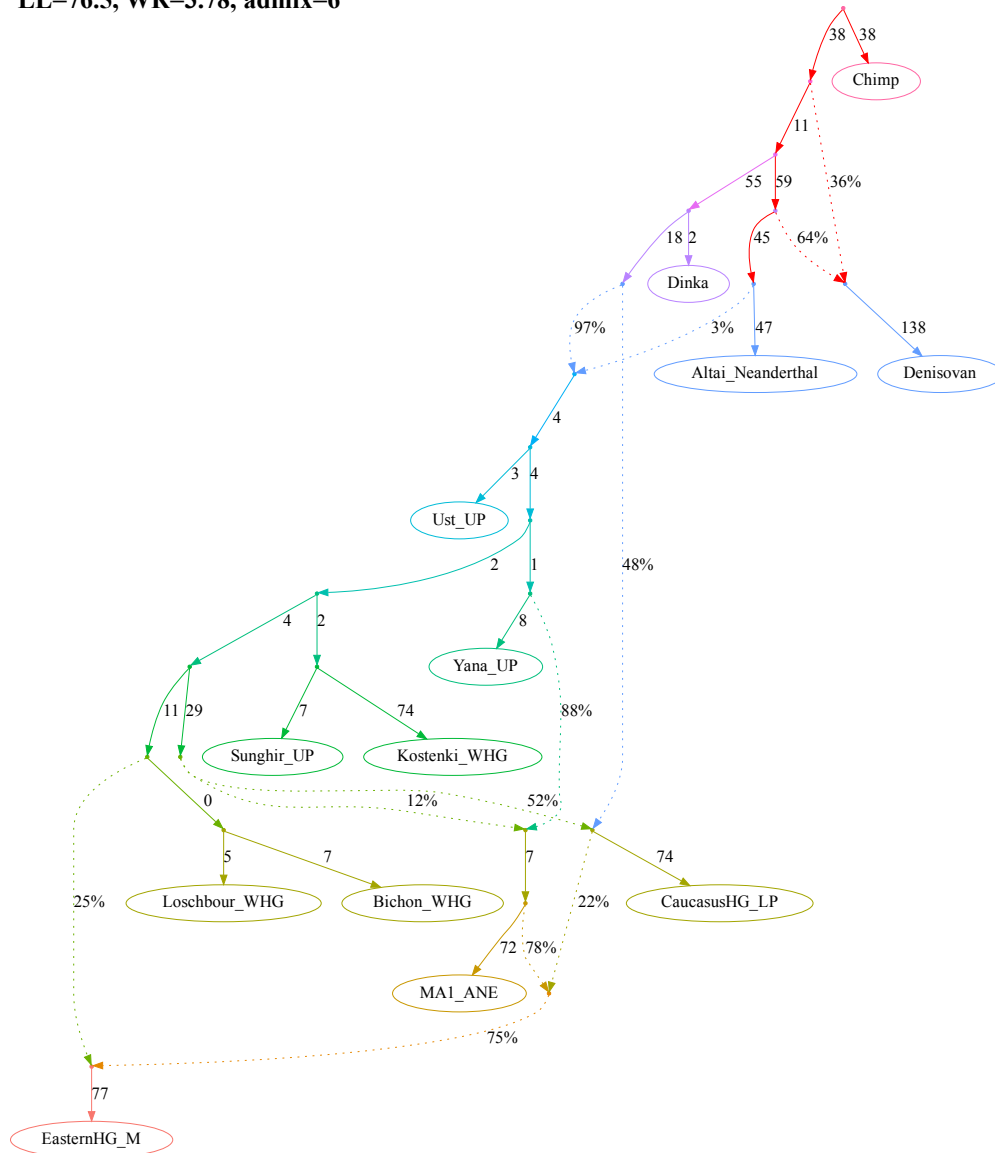

A claim by Sikora *et al.* 2019 relying on the admixture graph above:

The Mal'ta (MA1\_ANE) lineage receives a gene flow from the Caucasus hunter-gatherer (CaucasusHG\_LP) lineage.

**b, models fitting nominally better than the published one and not supporting the claim**

**LL=65.9, WR=3.32, admix=6**

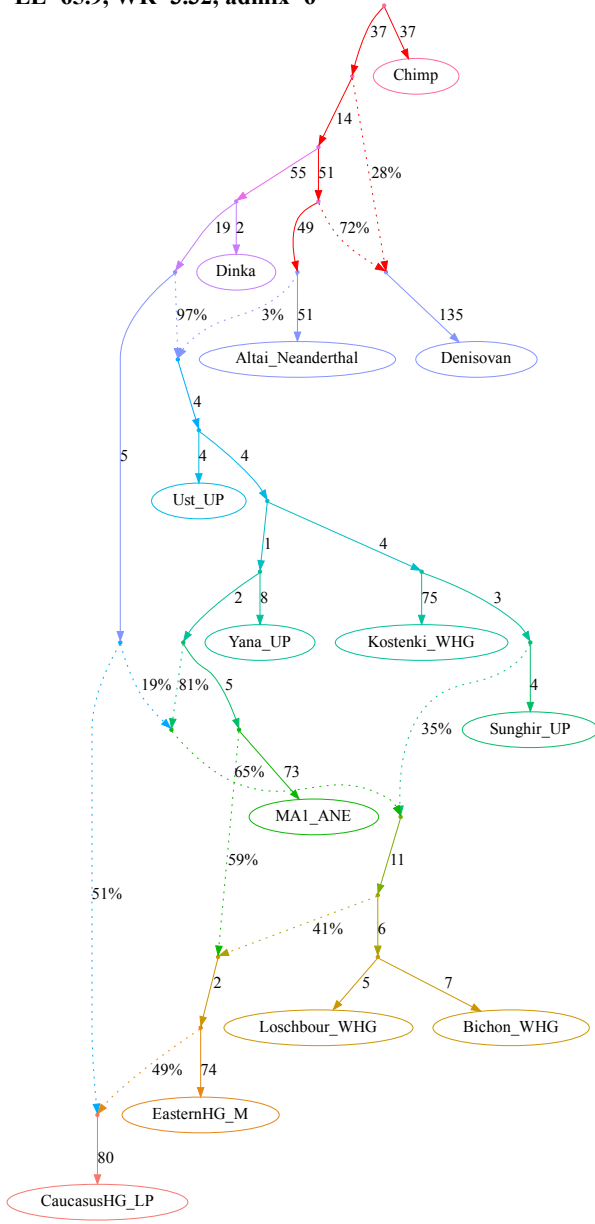

**LL=67.6, WR=3.51, admix=6**

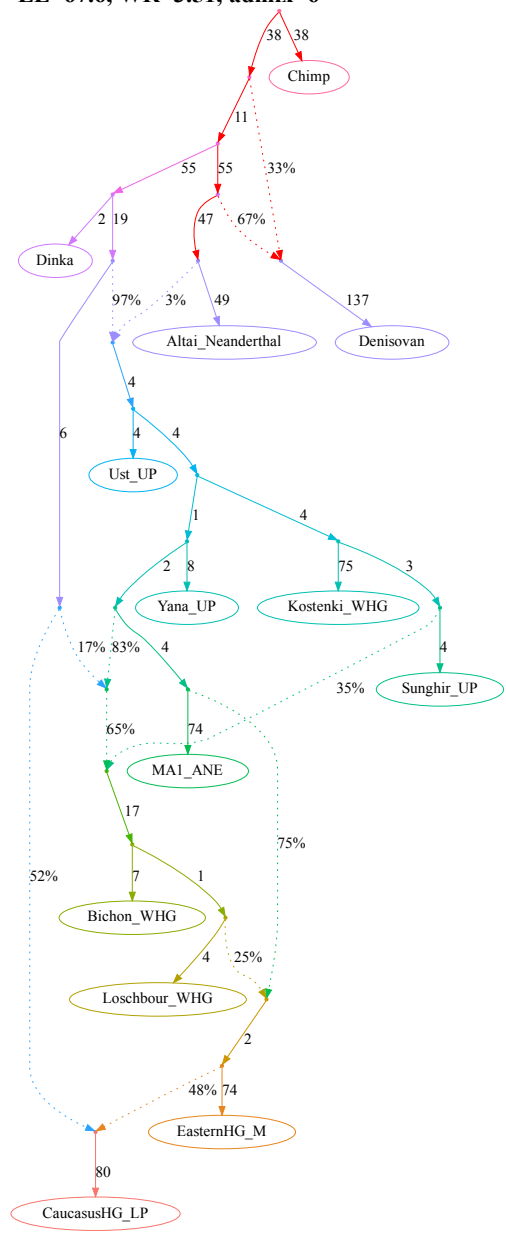

LL=67.6, WR=3.51, admix=6

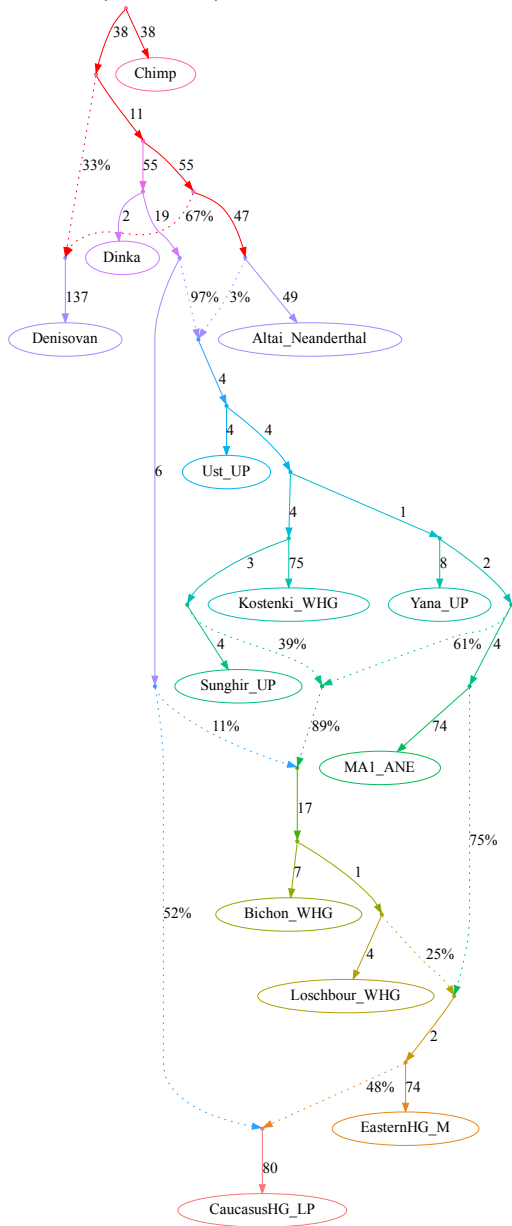

LL=68.3, WR=3.78, admix=6

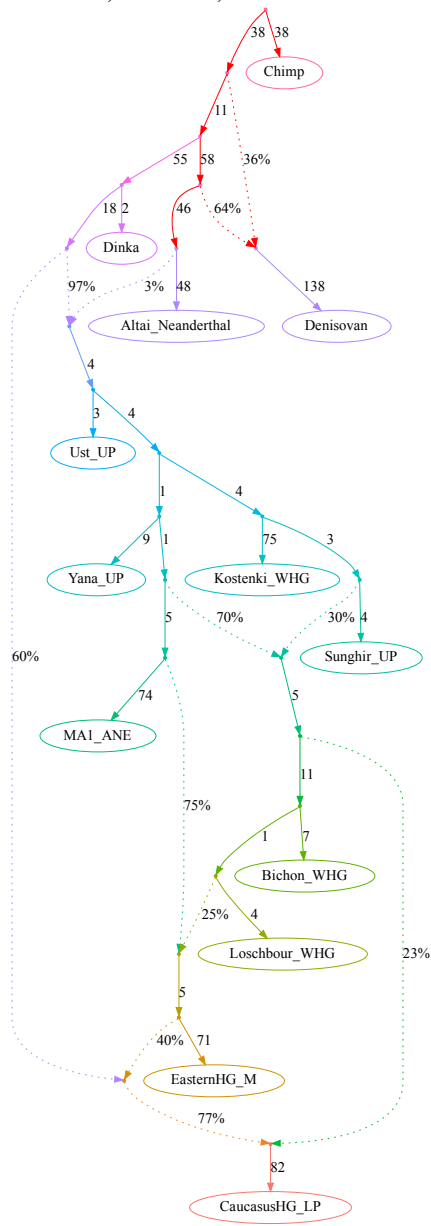

c, models fitting nominally better than the published one and not supporting the claim

LL=63.6, WR=3.57, admix=6

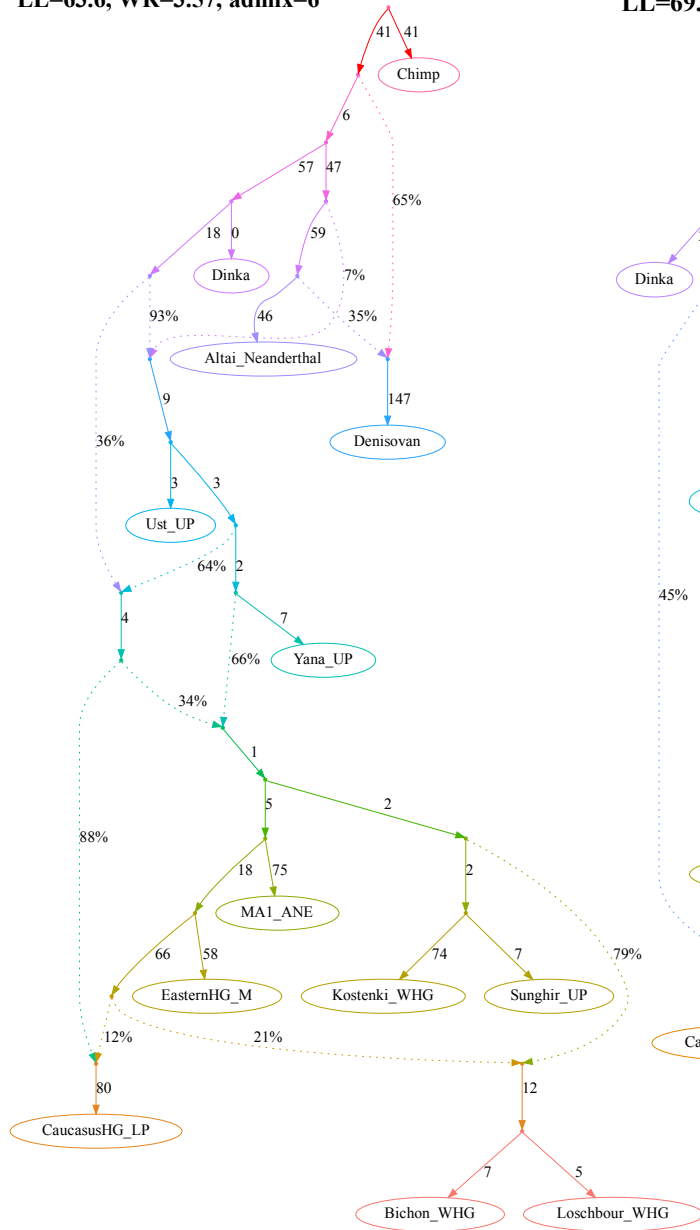

LL=69.1, WR=3.78, admix=6

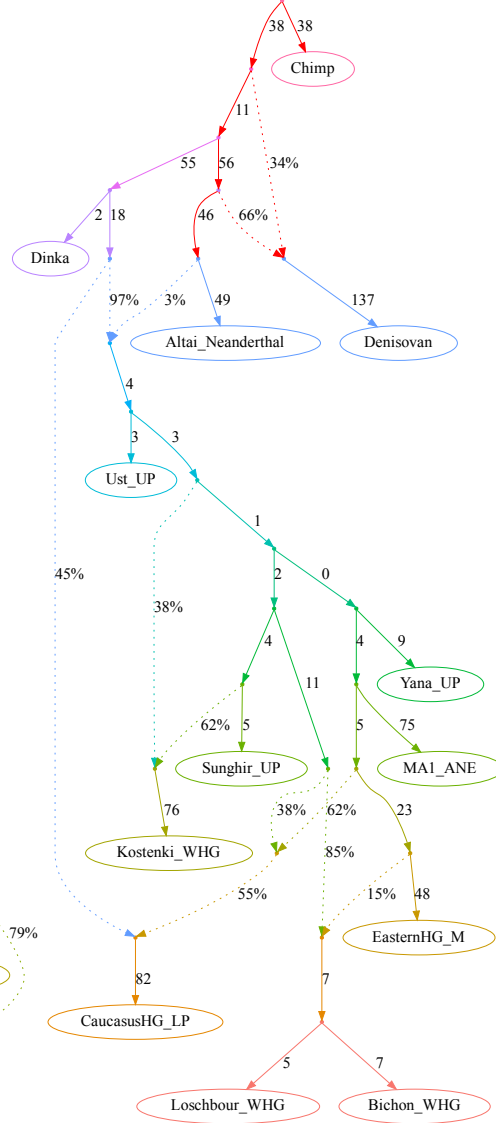

LL=69.2, WR=3.78, admix=6

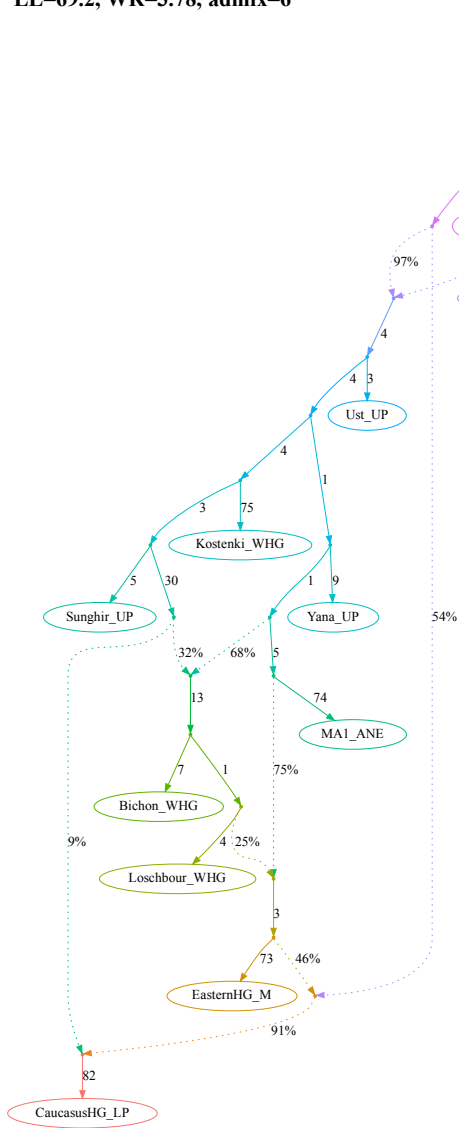

LL=69.7, WR=3.72, admix=6

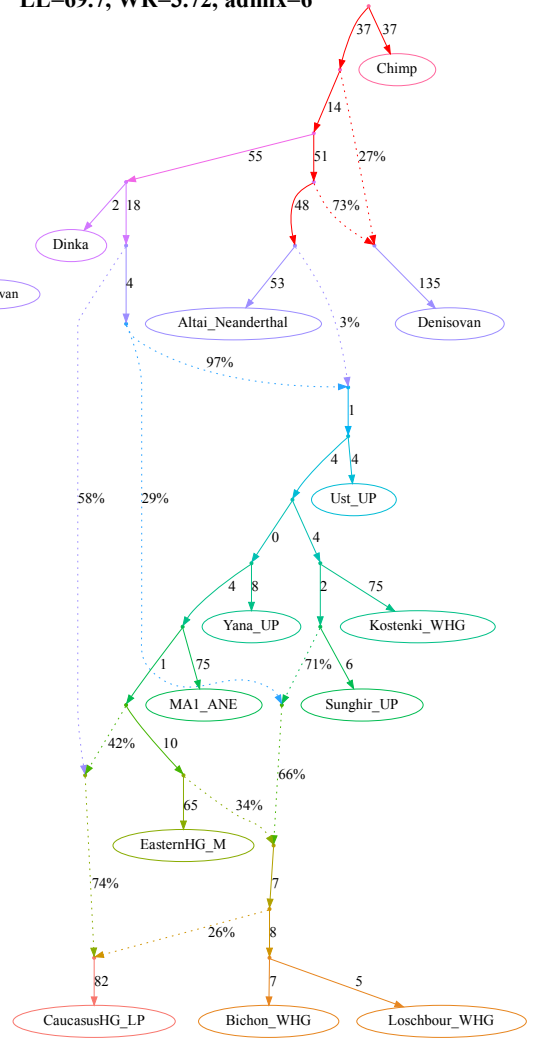

**d, models fitting nominally better than the published one and not supporting the claim**

**LL=70.8, WR=4.33, admix=6**

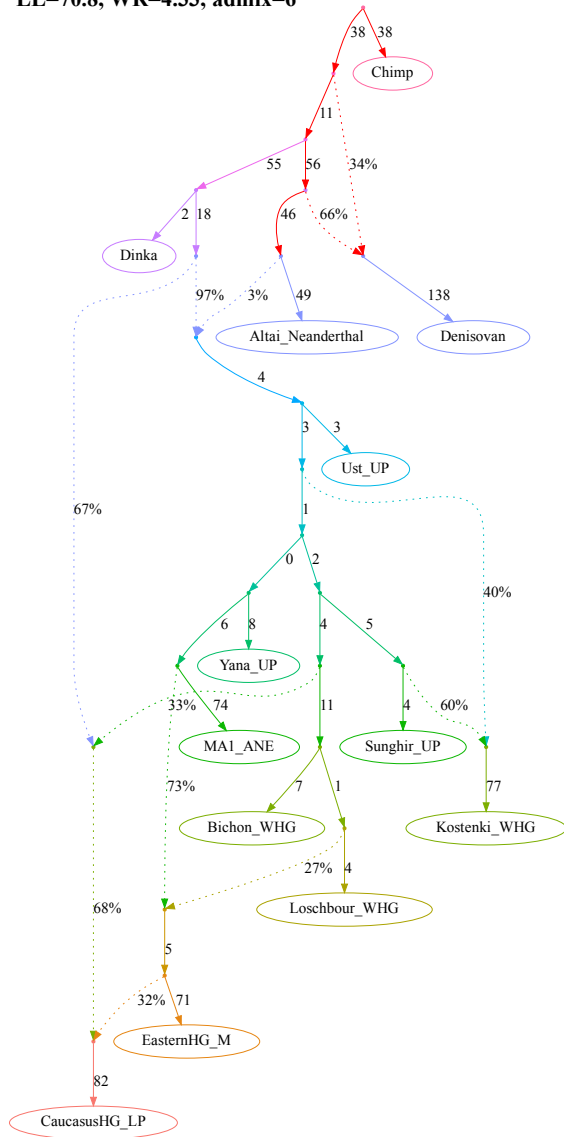

**LL=71.2, WR=4.33, admix=6**

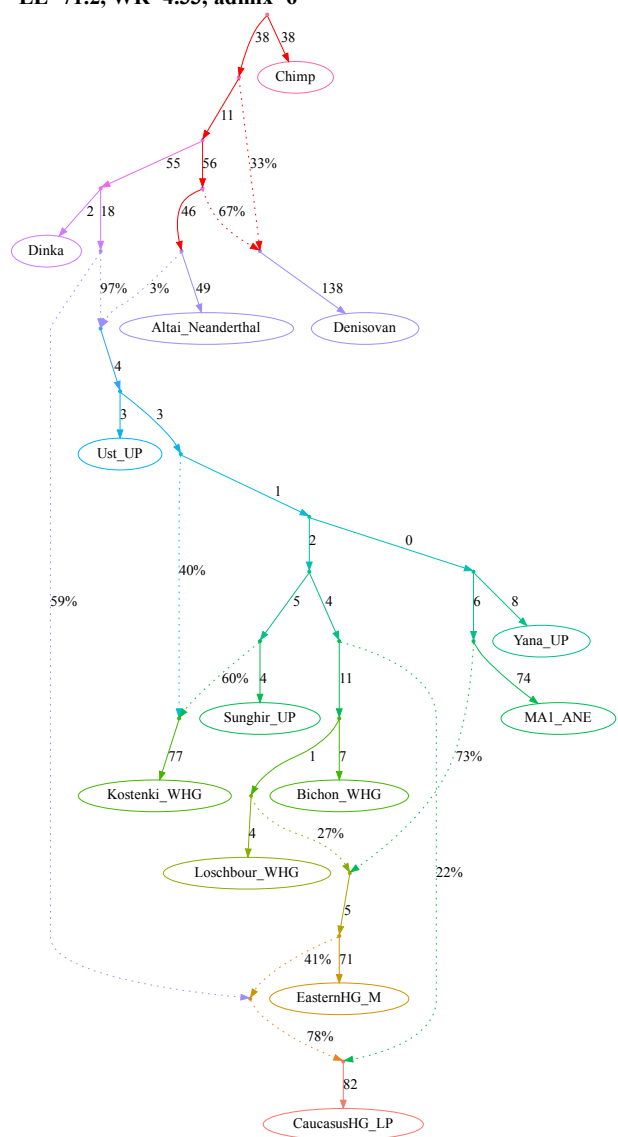

LL=66.2, WR=3.92, admix=6

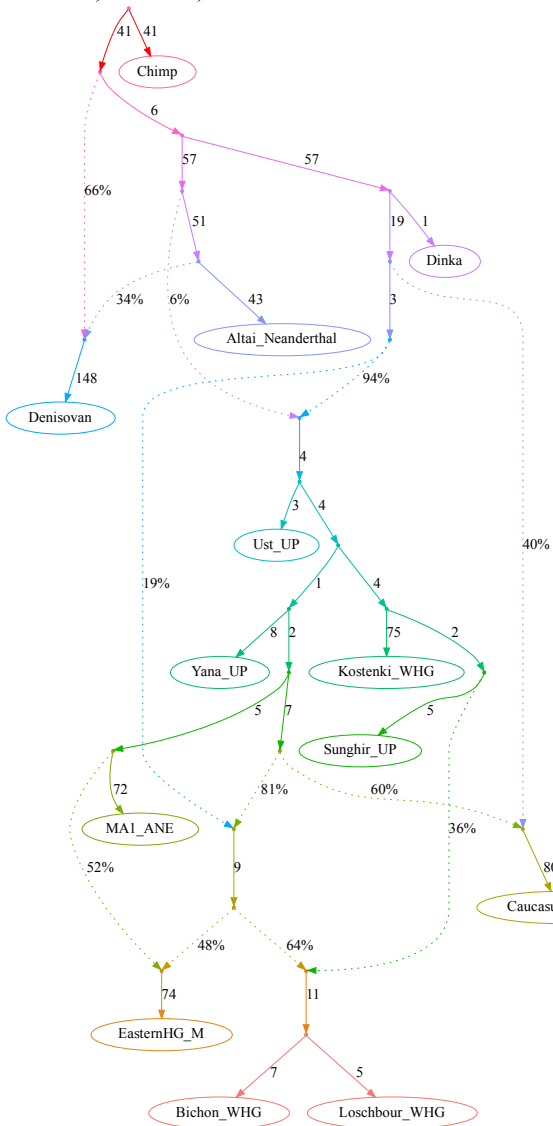

LL=70.6, WR=3.6, admix=6

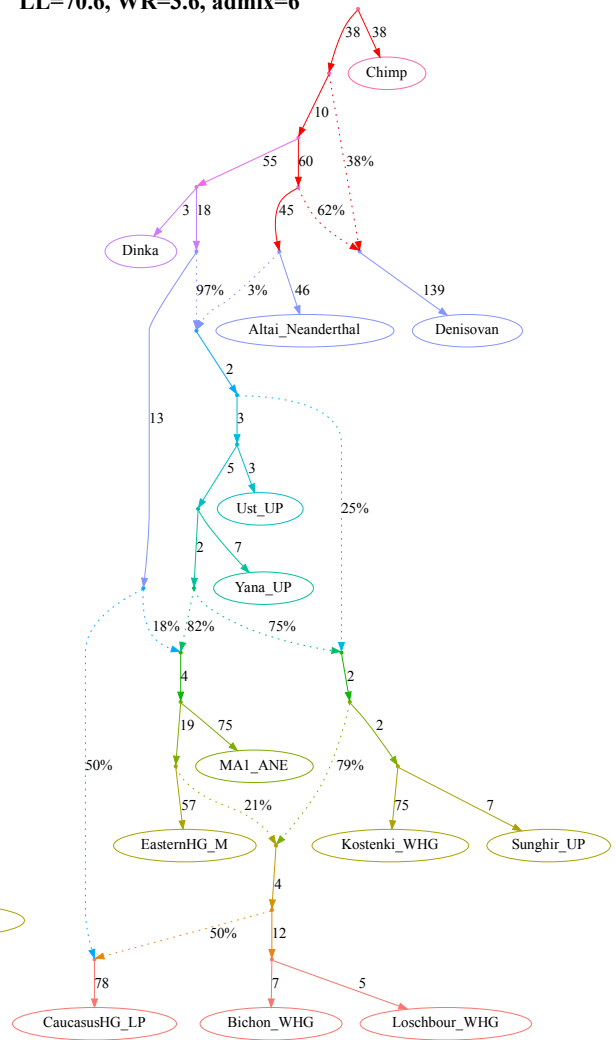

e, models fitting nominally better than the published one and not supporting the claim

LL=67, WR=3.78, admix=6

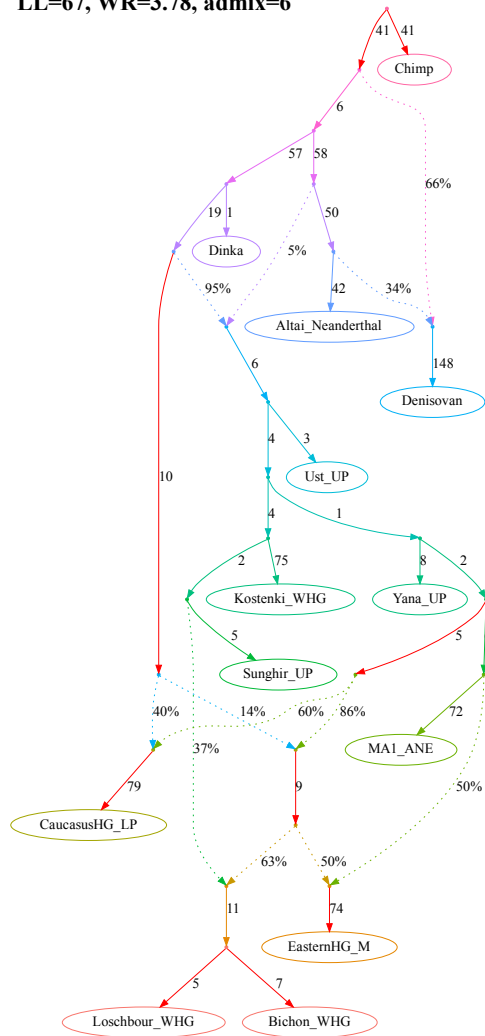

LL=67, WR=3.78, admix=6

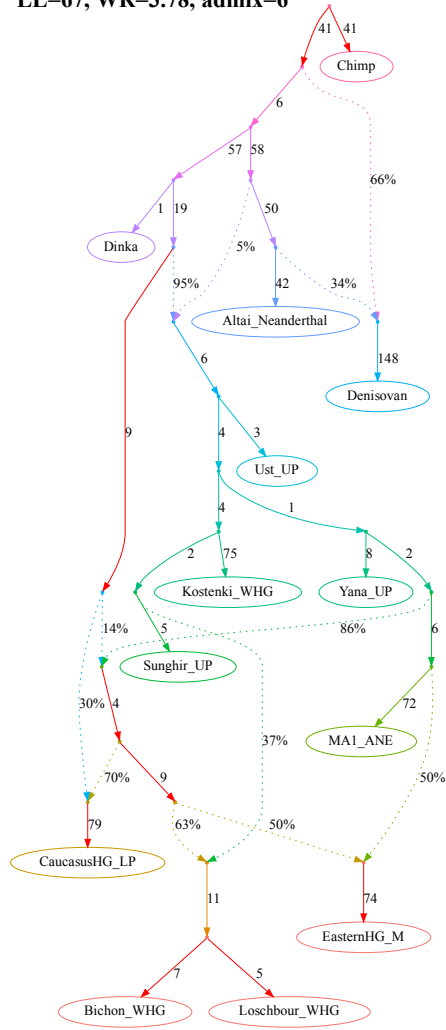



LL=71.2, WR=4.33, admix=6

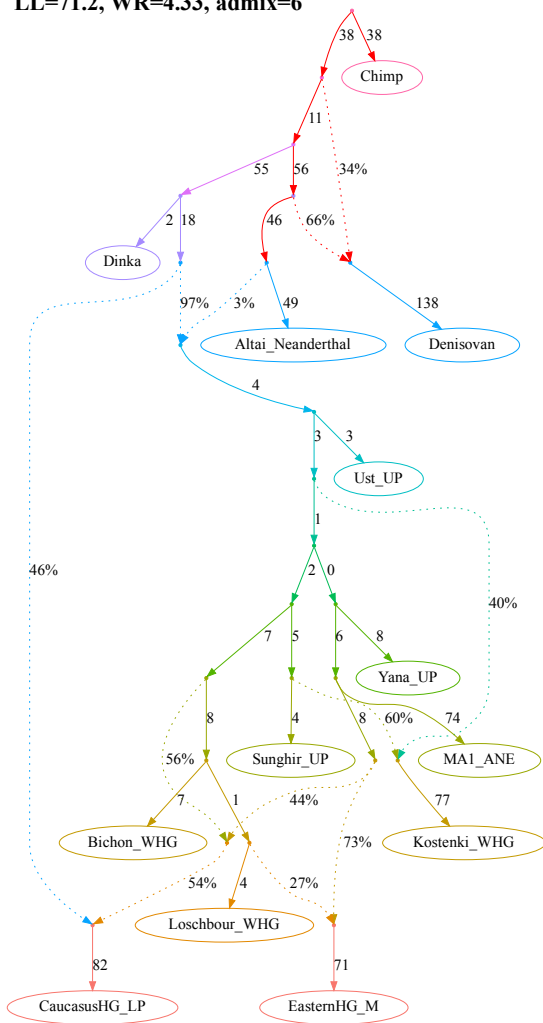

LL=70.7, WR=4.33, admix=6

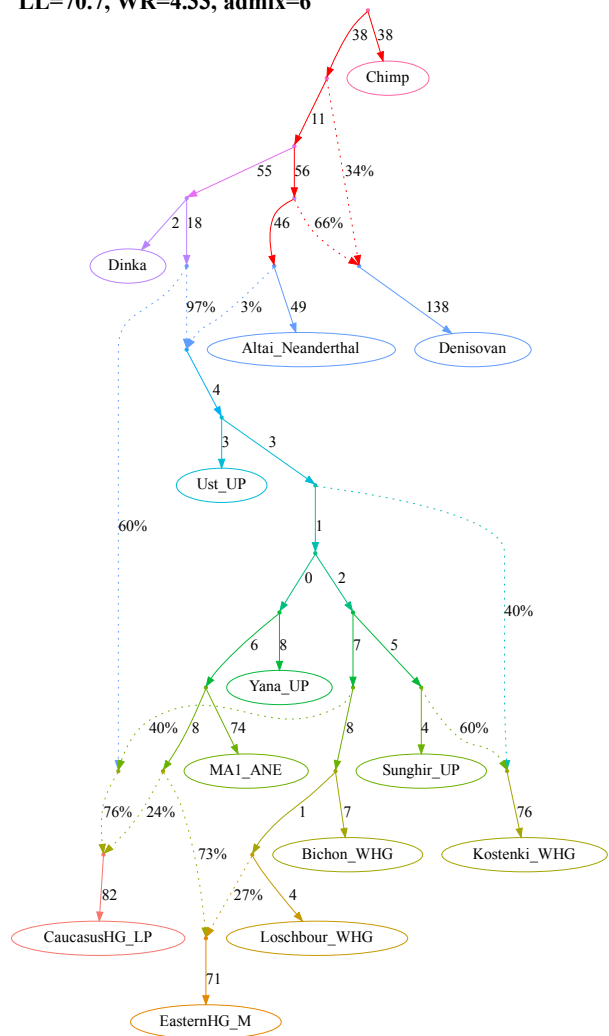

f, models fitting nominally better than the published one and not supporting the claim

LL=70.7, WR=4.33, admix=6

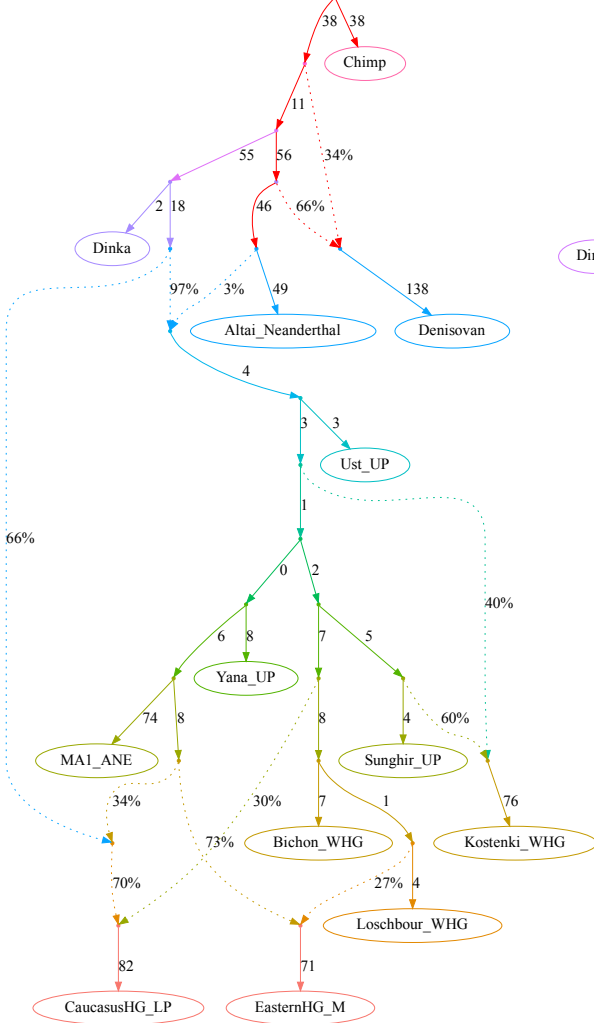

LL=71.1, WR=4.33, admix=6

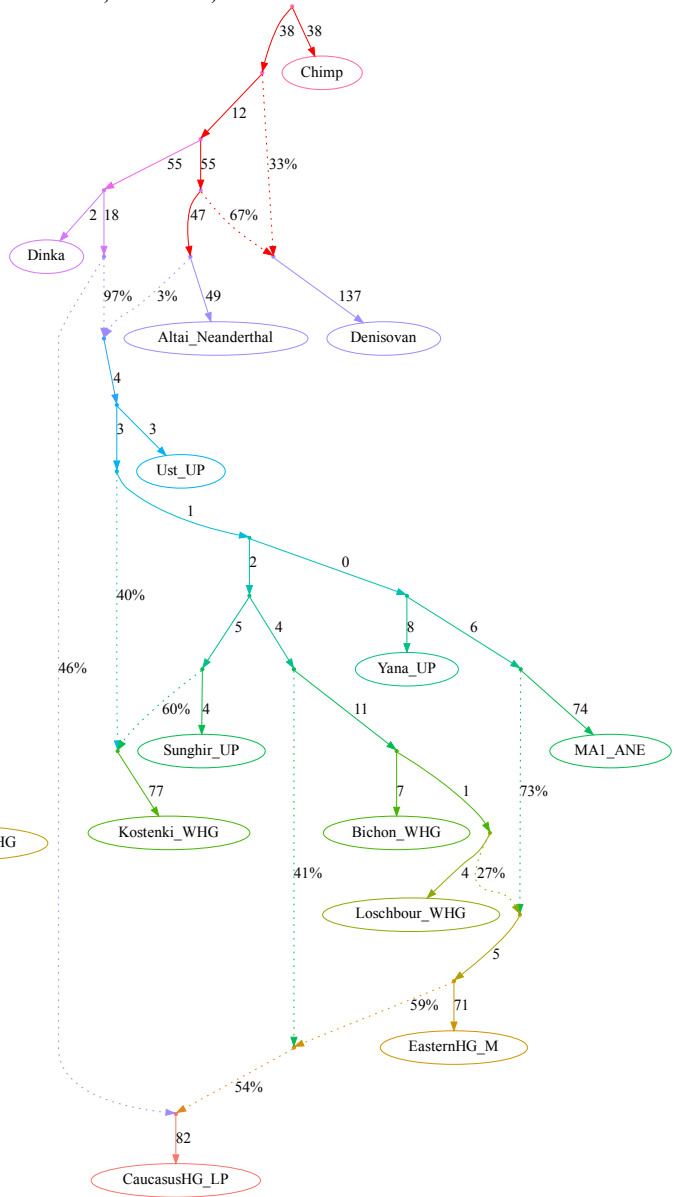

LL=71.4, WR=3.78, admix=6

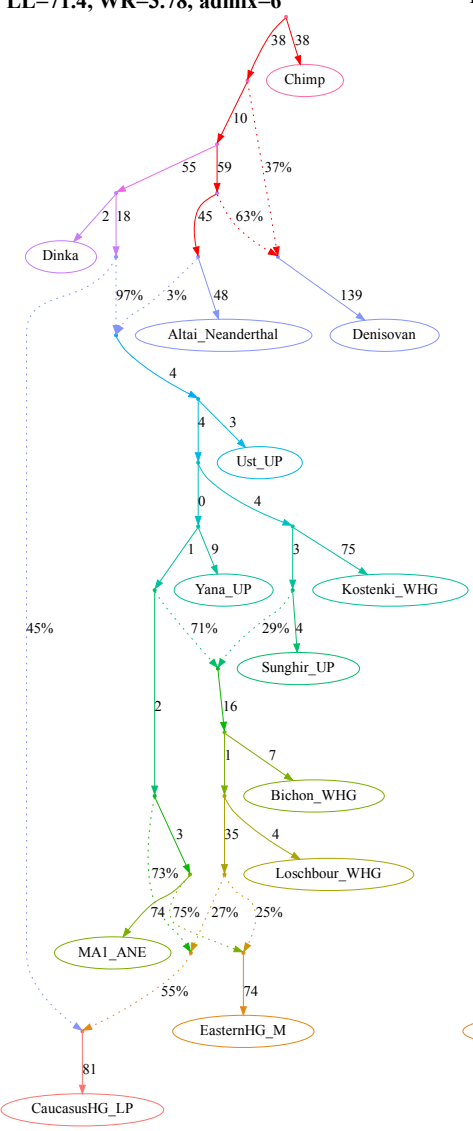

LL=72.2, WR=3.78, admix=6

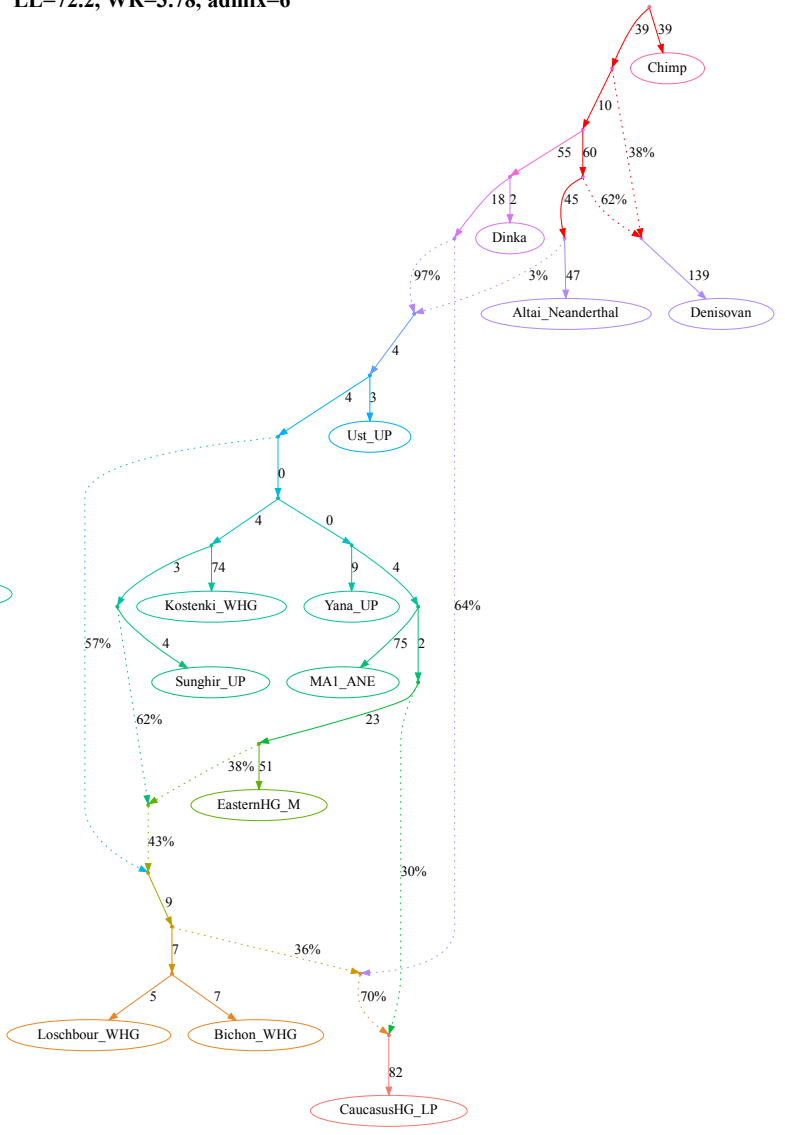

**g**, models fitting nominally better than the published one and not supporting the claim

**LL=72.7, WR=3.78, admix=6**

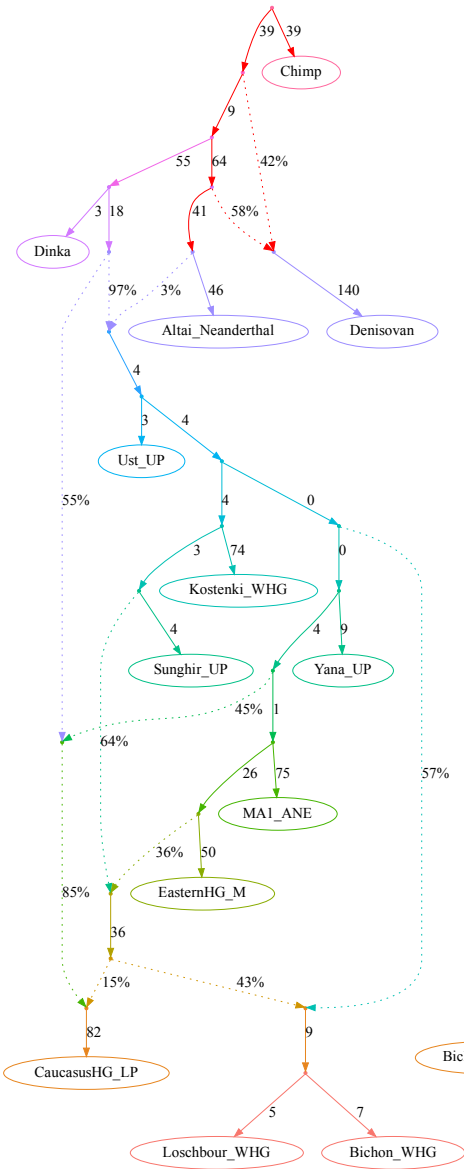

**LL=73.2, WR=3.78, admix=6**

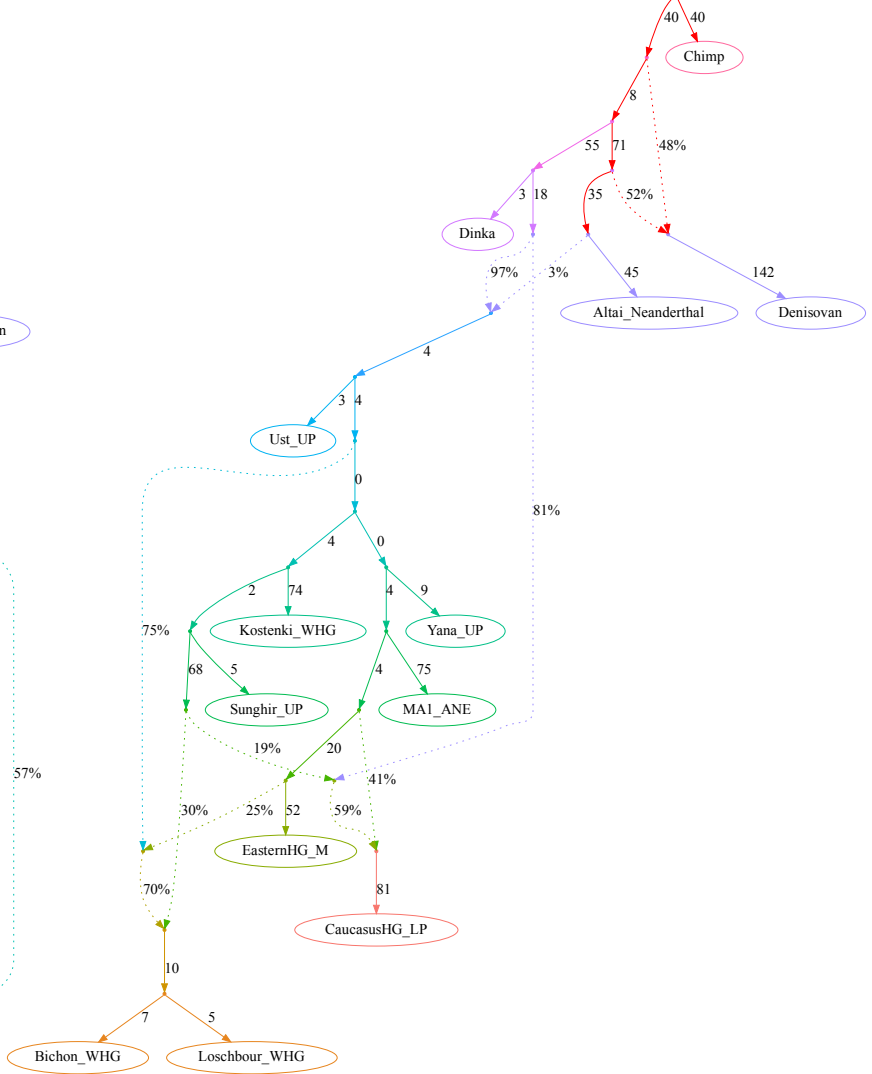

LL=73.4, WR=4.33, admix=6

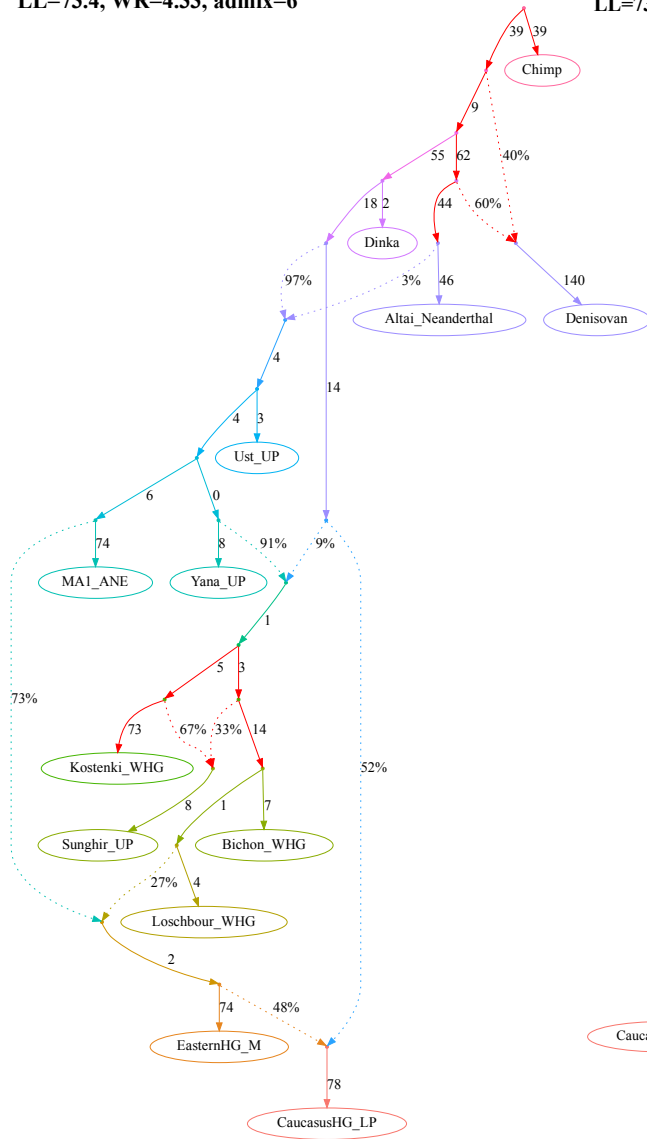

LL=73.9, WR=3.39, admix=6

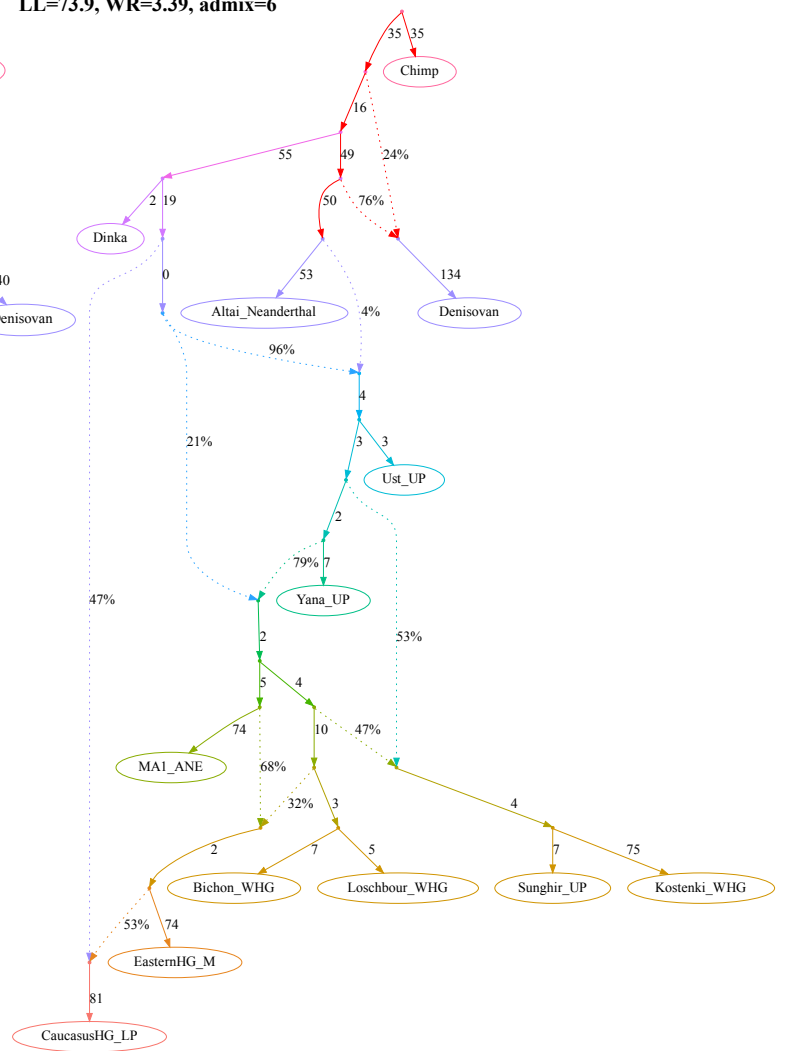

h, models fitting nominally better than the published one and not supporting the claim

LL=74.2, WR=4.33, admix=6

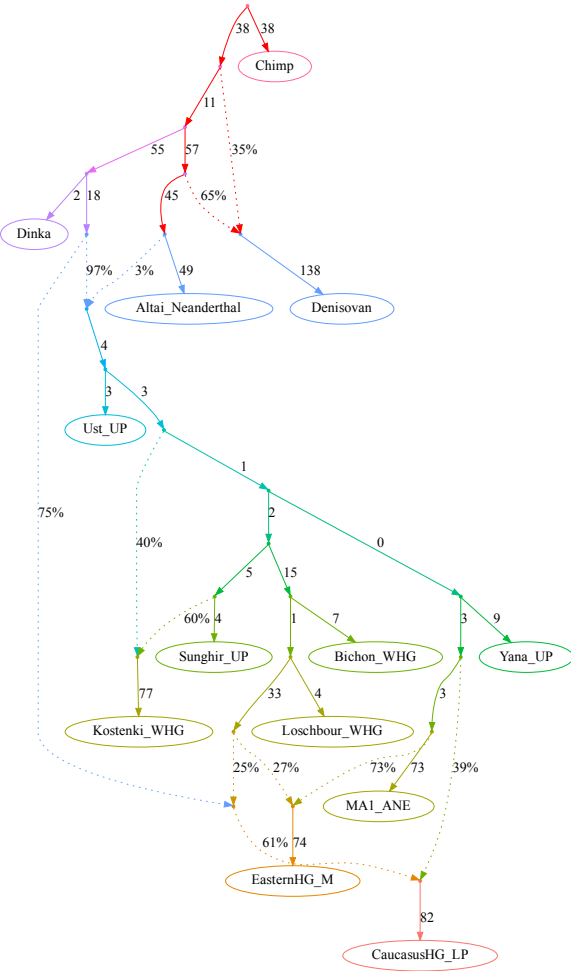

LL=74.2, WR=4.33, admix=6

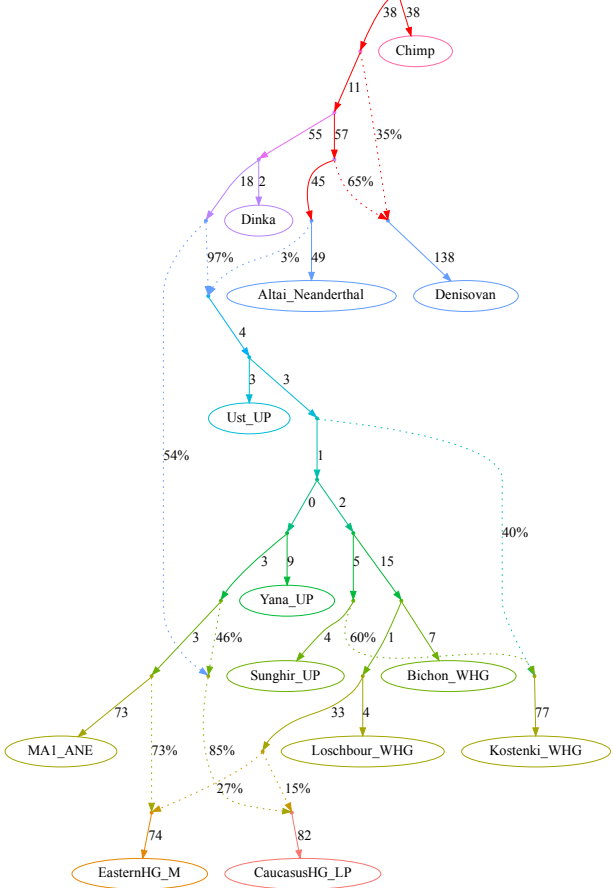

LL=75.1, WR=4.33, admix=6

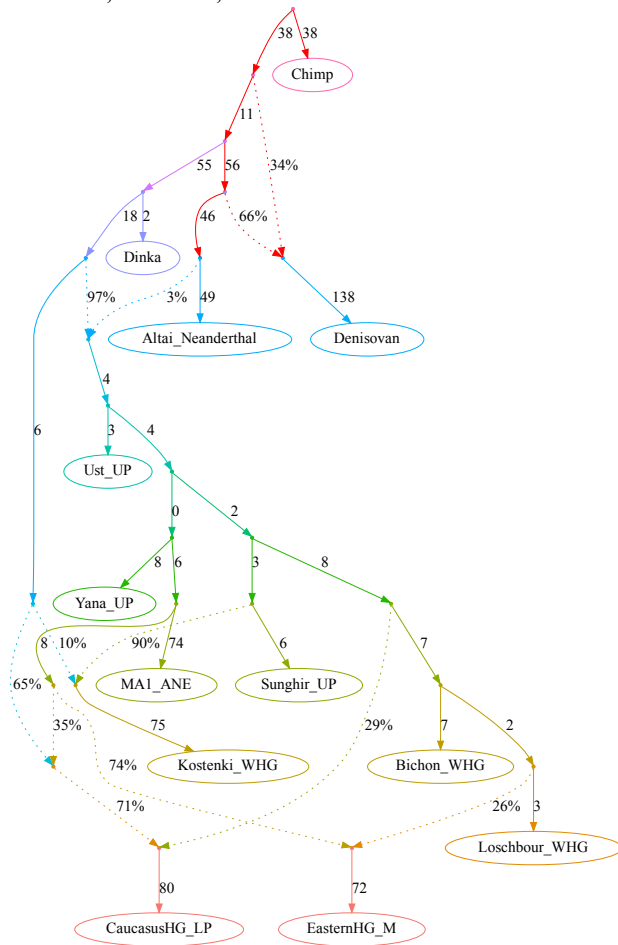

i, models fitting nominally better than the published one and supporting the claim

LL=75.1, WR=3.78, admix=6

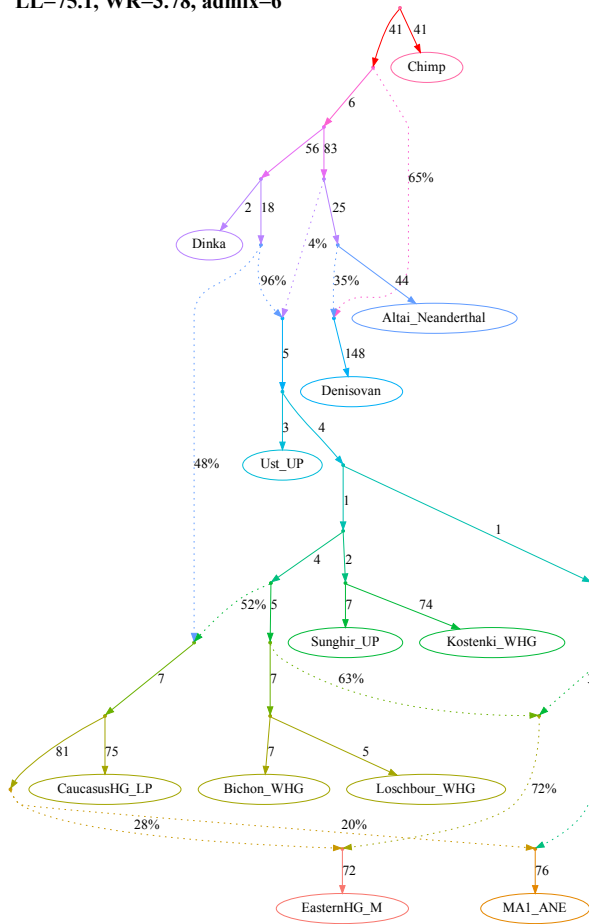

LL=75.9, WR=3.78, admix=6

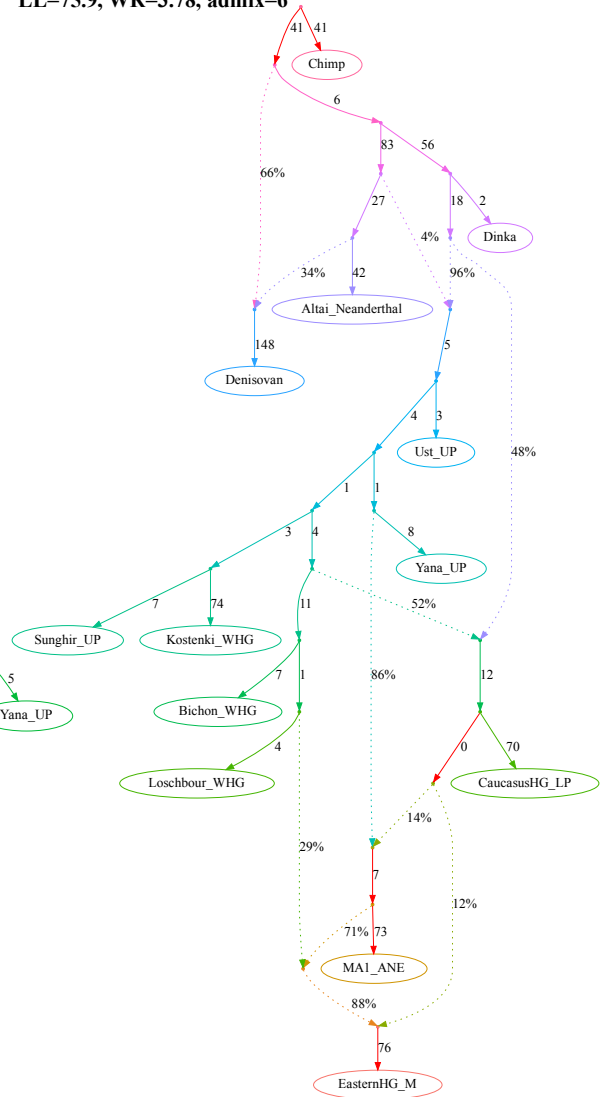

Supplement: elife-85492-fig4-data3.pdf [file elife-85492-fig4-data3.pdf]
