# Supplementary material for: On the limits of fitting complex models of population history to f-statistics
Source: PubMed Central journal article supplement (PMC10310323; doi:10.7554/elife.85492), 2023-06-29

**Figure 3—source data 1.** The published (Bergström et al. 2020) and alternative admixture graphs for dogs found with *findGraphs*. Model parameters (graph edges) that were inferred to be unidentifiable are plotted in red.

a, published model

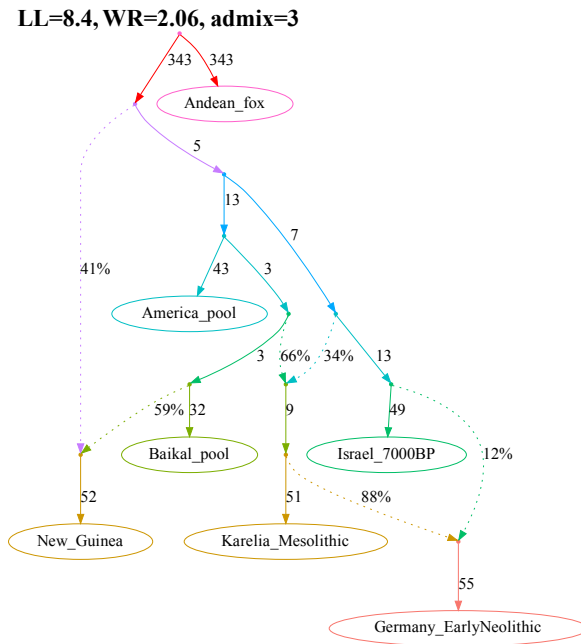

**b, alternative models fitting nominally better than the published one, sorted by the fit score**

the best model corresponding perfectly to the human history

**LL=2.4, WR=0.95, admix=3**

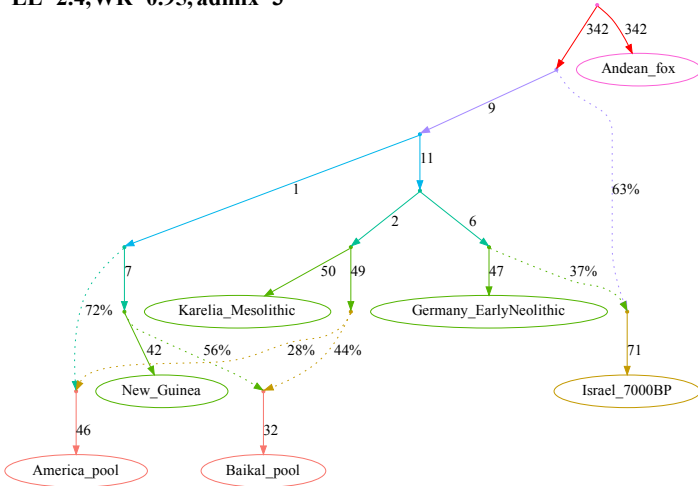

**LL=4.0, WR=1.48, admix=3**

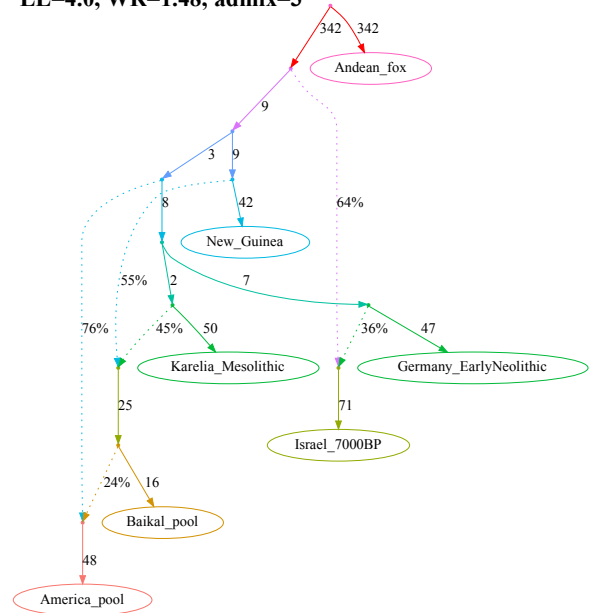

**LL=5.7, WR=2.04, admix=3**

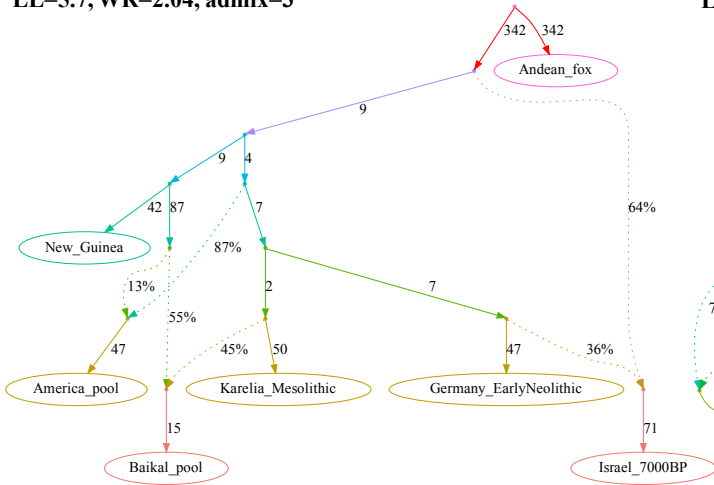

**LL=6.7, WR=2.04, admix=3**

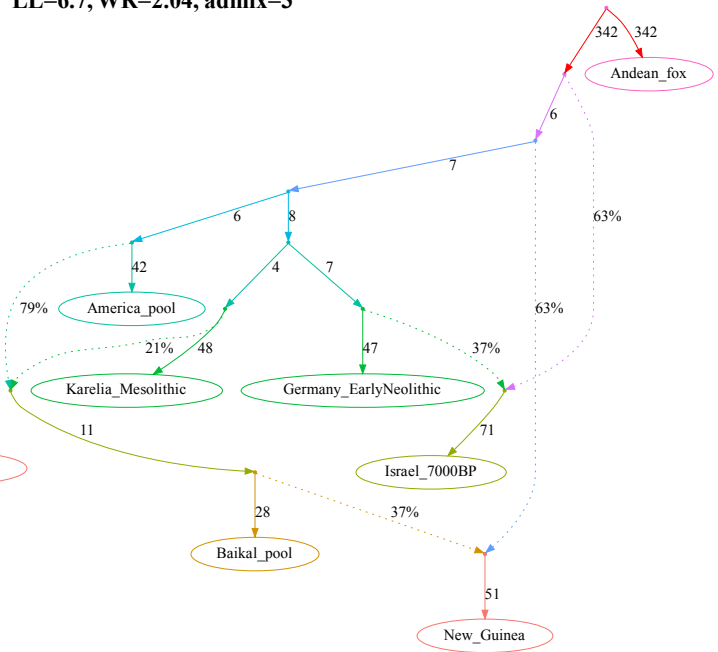

c, alternative models fitting nominally or significantly (the graph framed in blue) better than the published one, sorted by the fit score

LL=7.5, WR=1.85, admix=3

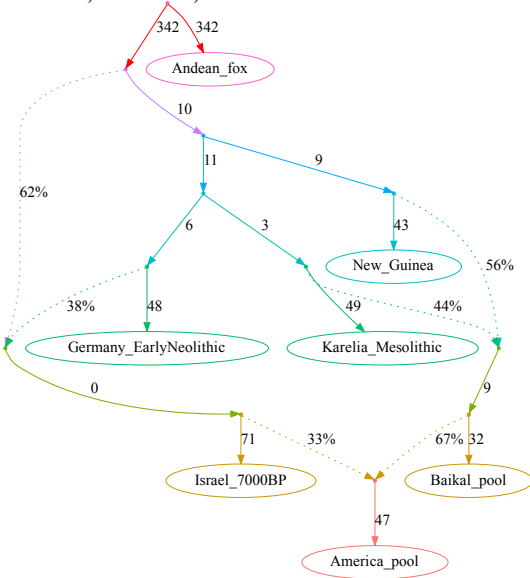

LL=8.4, WR=2.06, admix=3

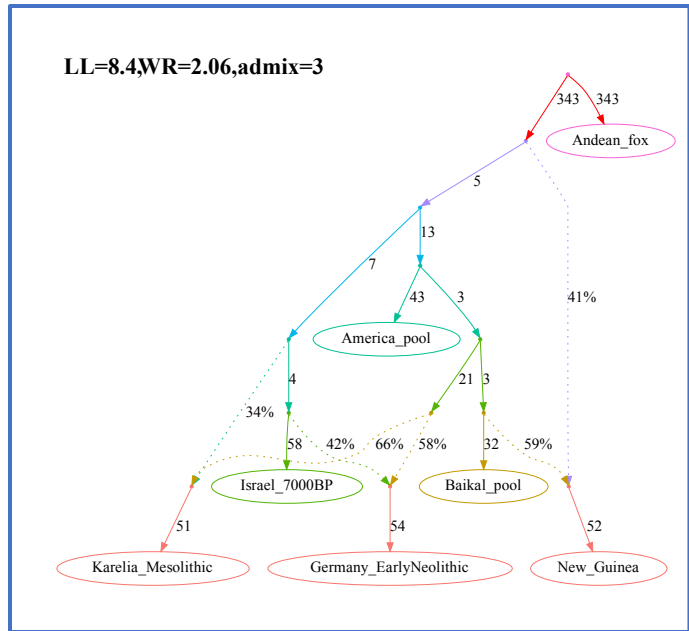

Supplement: elife-85492-fig3-data1.pdf [file elife-85492-fig3-data1.pdf]
