# Supplementary material for: On the limits of fitting complex models of population history to f-statistics
Source: PubMed Central journal article supplement (PMC10310323; doi:10.7554/elife.85492), 2023-06-29

**Figure 3—source data 3.** Published admixture graph from Lazaridis *et al.* (2014) and alternative graphs found with *findGraphs* (7 populations, 4 admixture events). Model parameters (graph edges) that were inferred to be unidentifiable are plotted in red.

a, the re-fitted published graph

LL=8.7, WR=2.21, admix=4

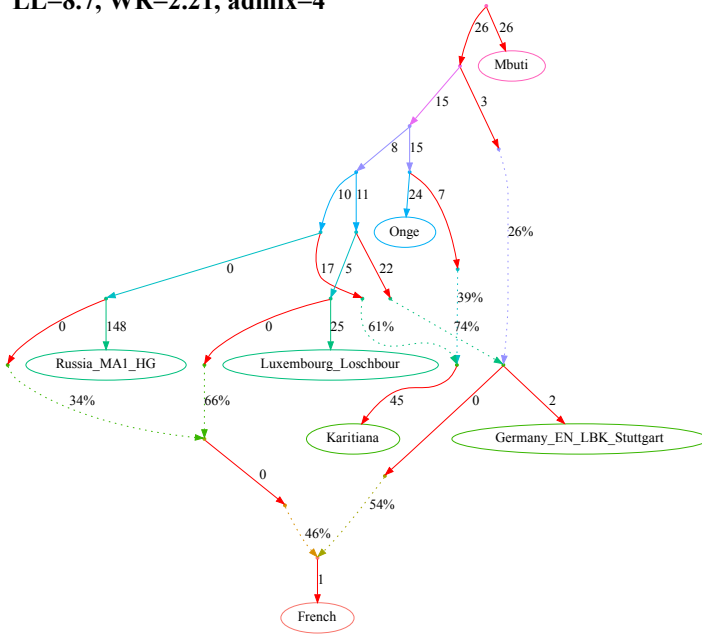

**b**, ten examples of graphs inferred by *findGraphs* (arranged according to LL score) and fitting significantly (the graph framed in blue) or nominally better than the published model.

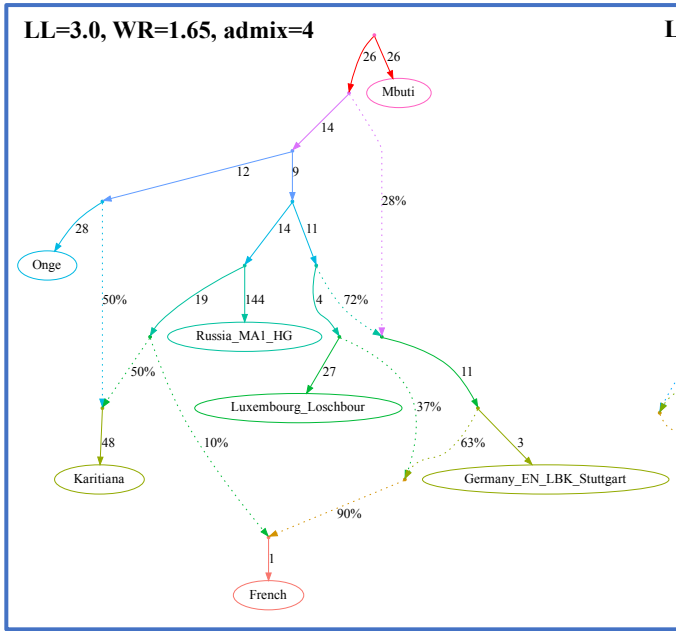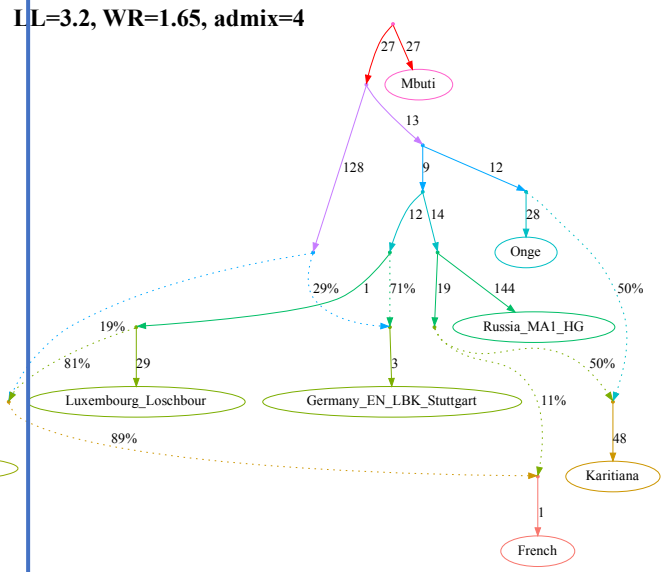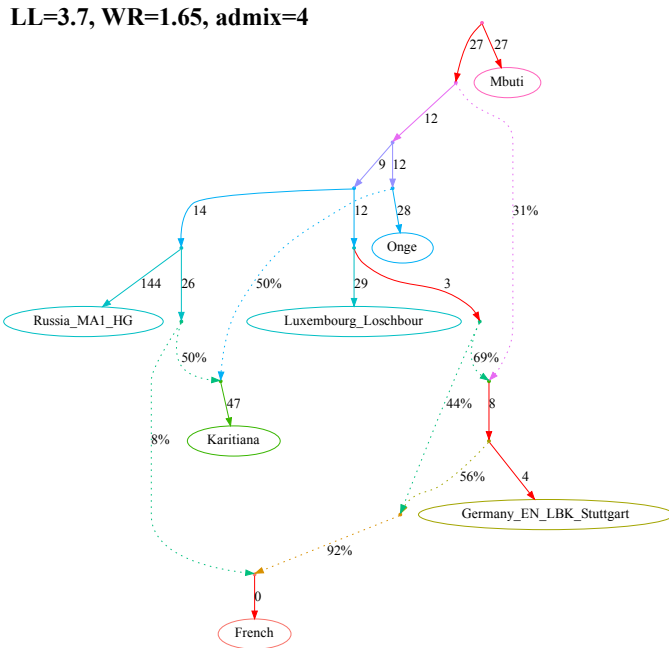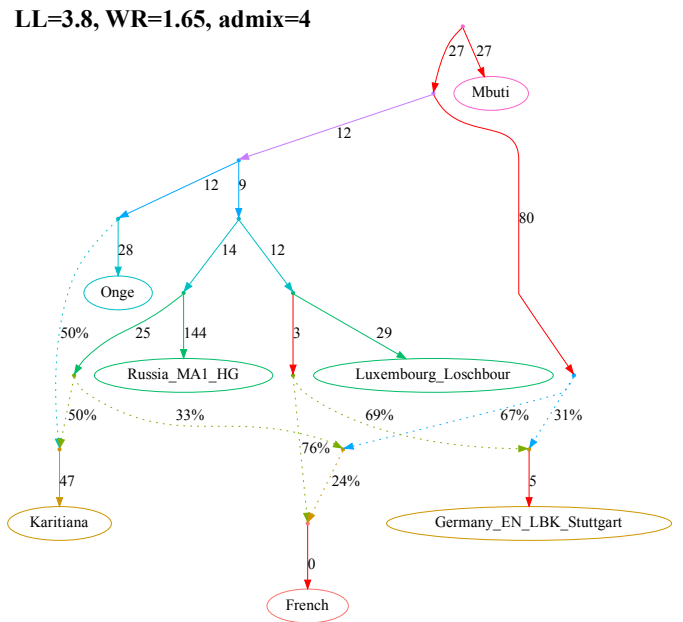

LL=4.5, WR=1.83, admix=4

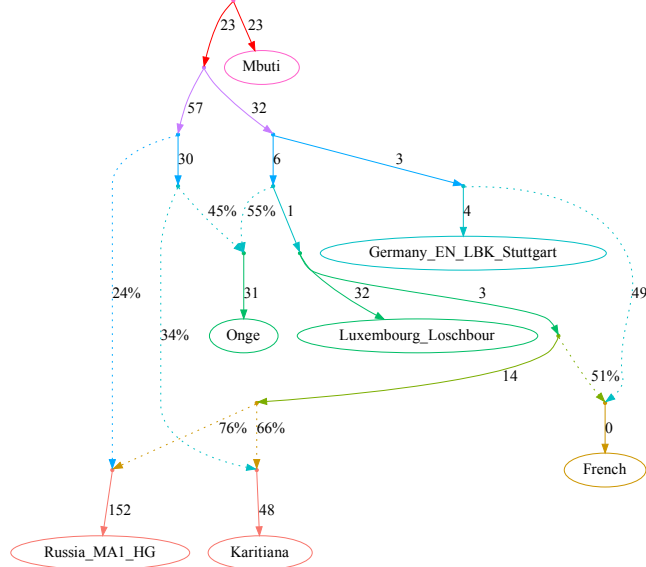

LL=4.5, WR=1.83, admix=4

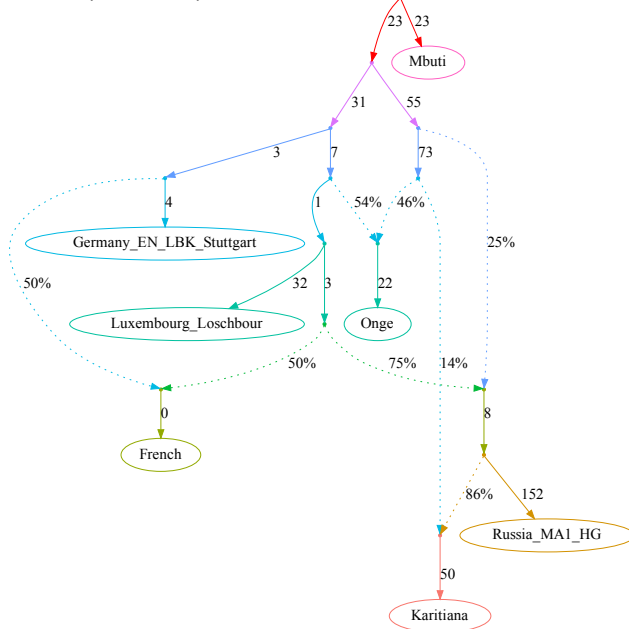

LL=5.3, WR=1.58, admix=4

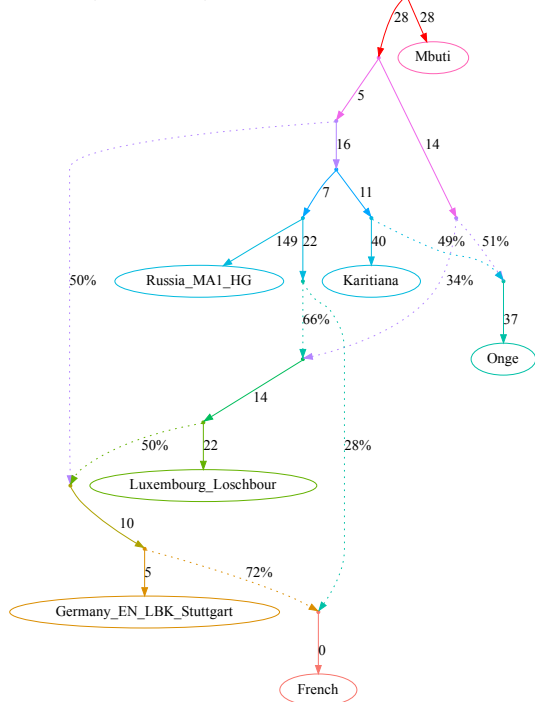

LL=5.7, WR=2.00, admix=4

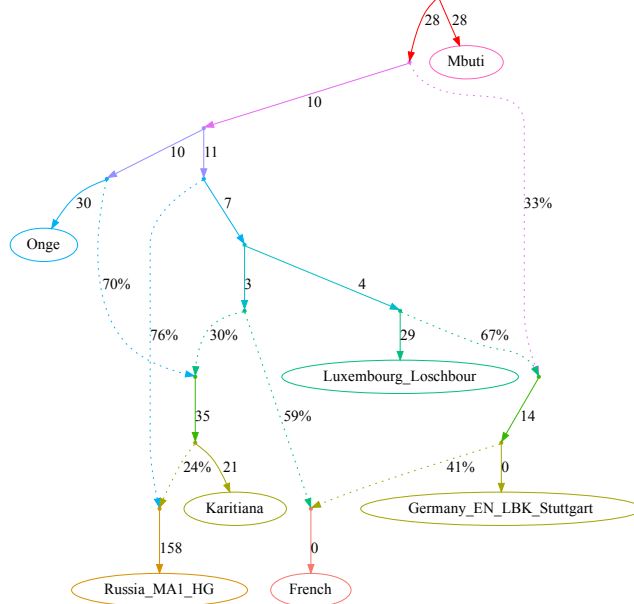

LL=6.2, WR=2.03, admix=4

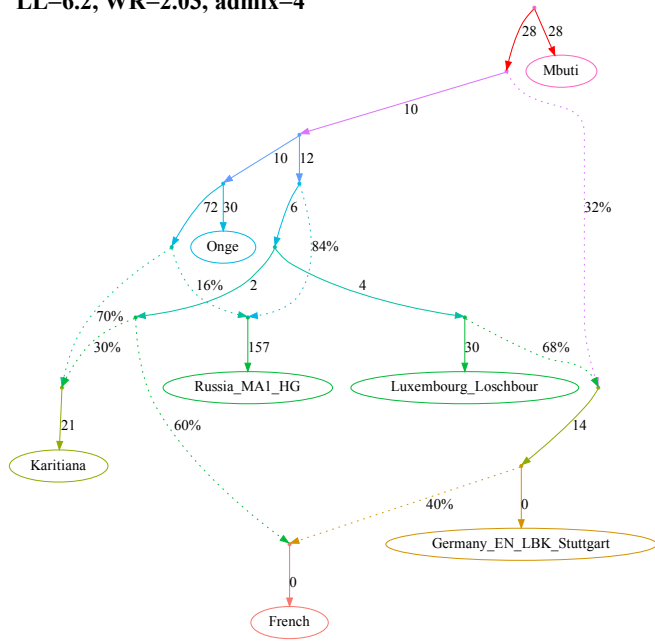

LL=7.2, WR=1.91, admix=4

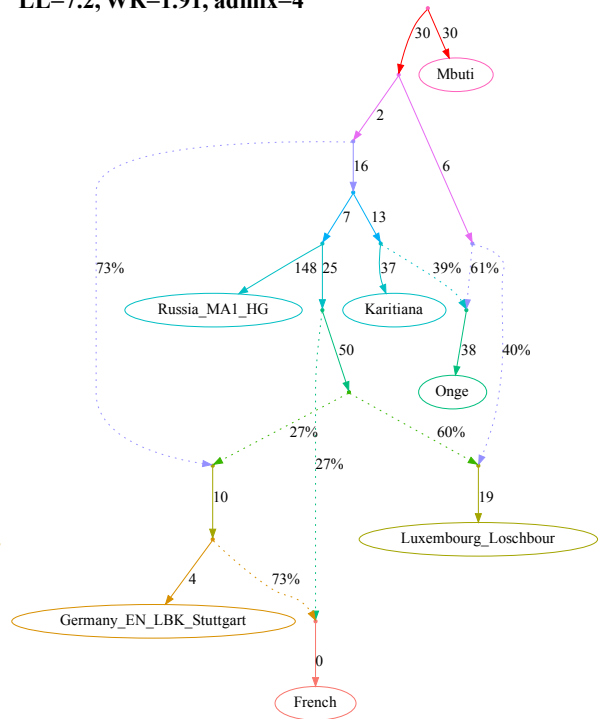

Supplement: elife-85492-fig3-data3.pdf [file elife-85492-fig3-data3.pdf]
