# Supplementary material for: On the limits of fitting complex models of population history to f-statistics
Source: eLife journal article supplement (doi:10.7554/elife.85492), 2023-04-14

**Figure S3.** Alternative admixture graphs for humans found with *findGraphs* for the dataset from Bergström *et al.* (2020). Model parameters (graph edges) that were inferred to be unidentifiable are plotted in red.

**LL=1.0, WR=0.61, admix=3**

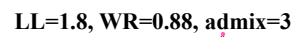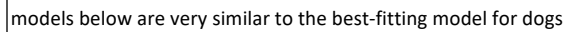

LL=6.1, WR=2.05, admix=3

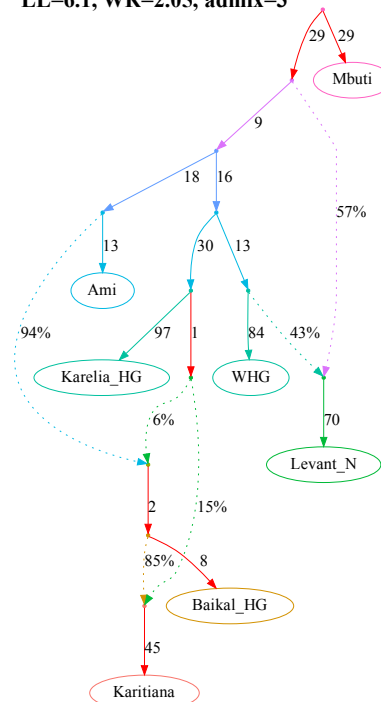

Figure S3

**b**, best-fitting models for humans sorted by the fit score

LL=6.1, WR=2.05, admix=3

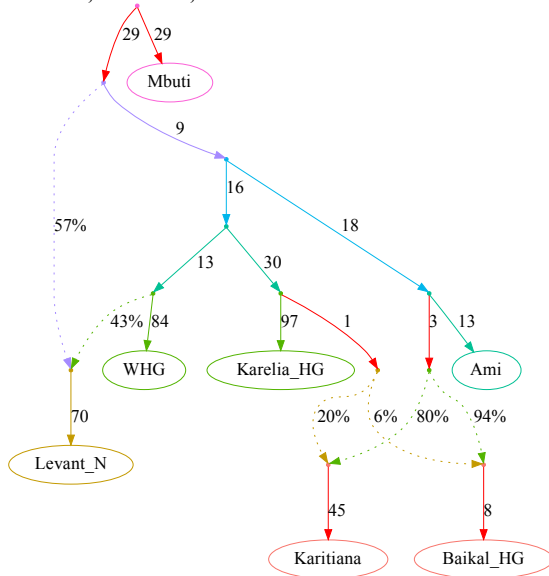

LL=6.1, WR=2.05, admix=3

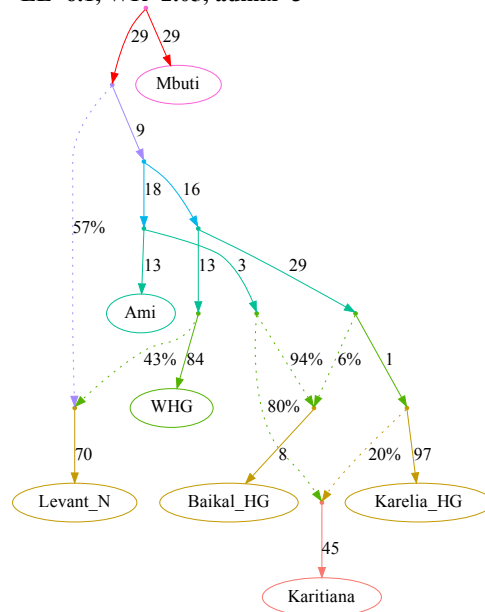

LL=6.2, WR=2.05, admix=3

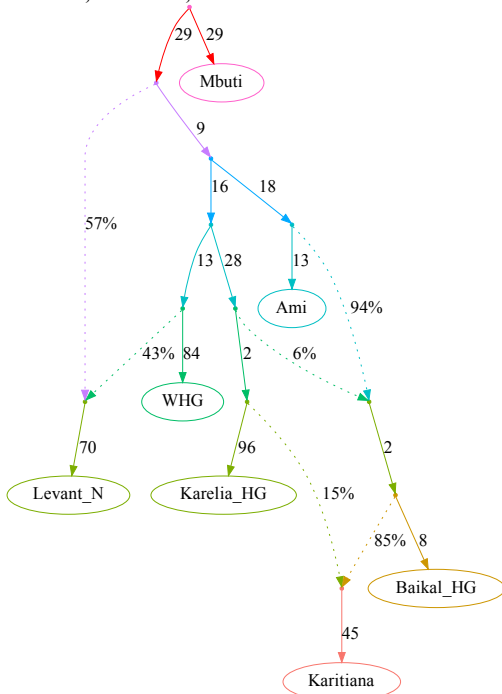

LL=6.2, WR=2.05, admix=3

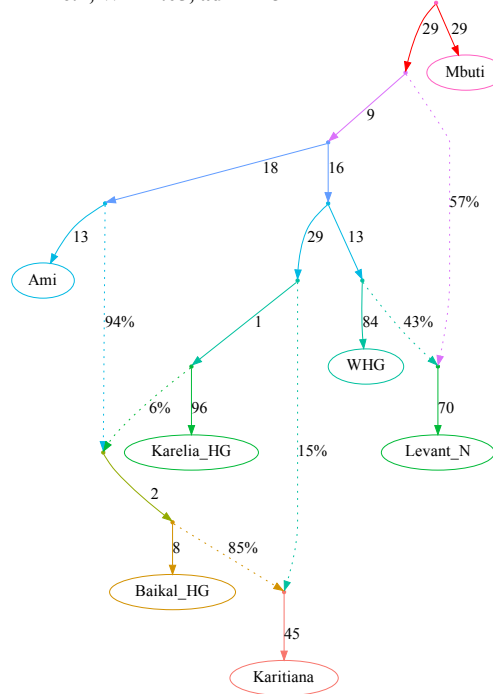

Supplement: supp [file elife-85492-supp-v1.zip]
