# Supplementary material for: On the limits of fitting complex models of population history to f-statistics
Source: eLife journal article supplement (doi:10.7554/elife.85492), 2023-04-14

Figure S7

**Figure S7.** Alternative graphs allowing for an additional admixture event found with *findGraphs* for the dataset from Shinde *et al.* (2019): 8 populations, 4 admixture events, the modified group composition and the updated algorithm for calculating  $f$ -statistics. The graphs were also re-fitted on the original set of SNPs/individuals and using the original algorithm for calculating  $f$ -statistics. Model parameters (graph edges) that were inferred to be unidentifiable are plotted in red.

**a**, highest-ranking model with 4 admixture events; confirms all important features of the published model with 3 admixture events

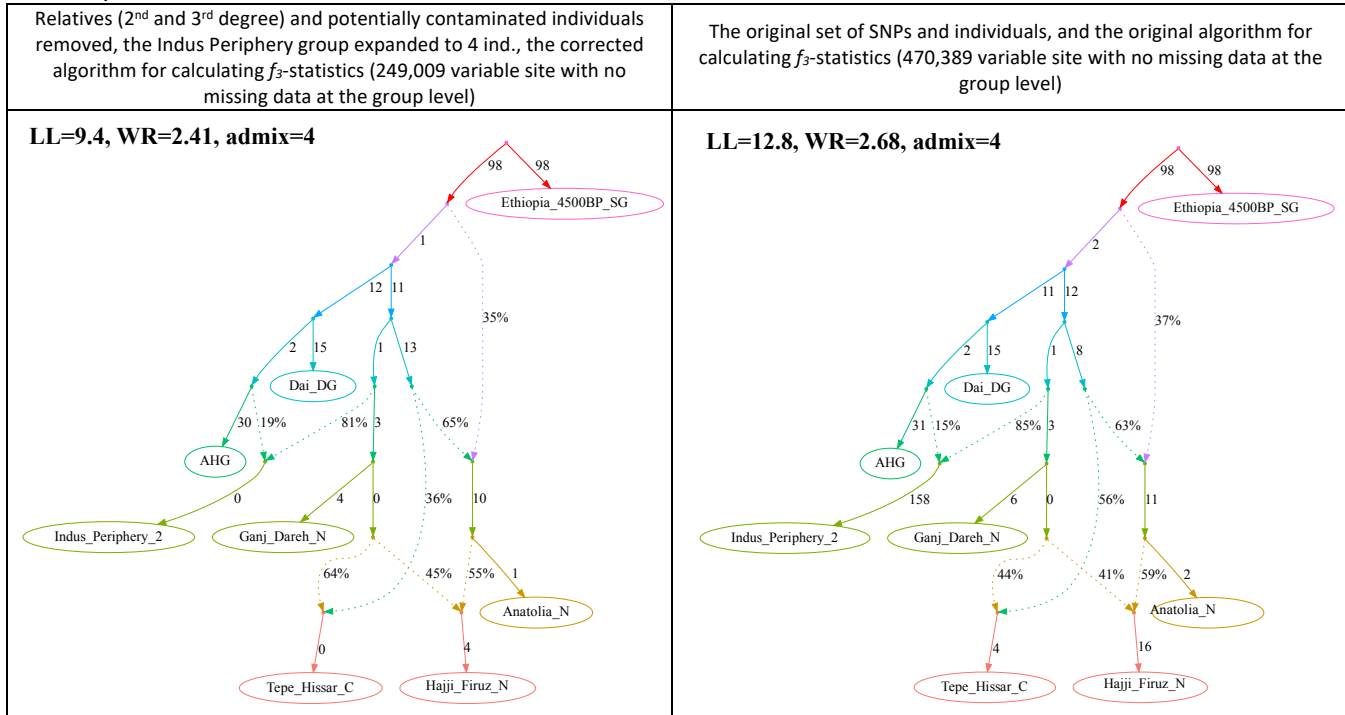

A claim by Shinde *et al.* 2019 relying on the admixture graph:

Primary ancestry in the Indus Periphery group forms the deepest branch in the Iranian Neolithic clade composed of the Indus Periphery, Ganj Dareh Neolithic, Hajji Firuz Chalcolithic and Tepe Hissar Chalcolithic groups.

Figure S7

**b**, alternative models fitting not significantly worse than the highest-ranking one and contradicting the historical interpretation of the admixture graph results by Shinde et al. 2019

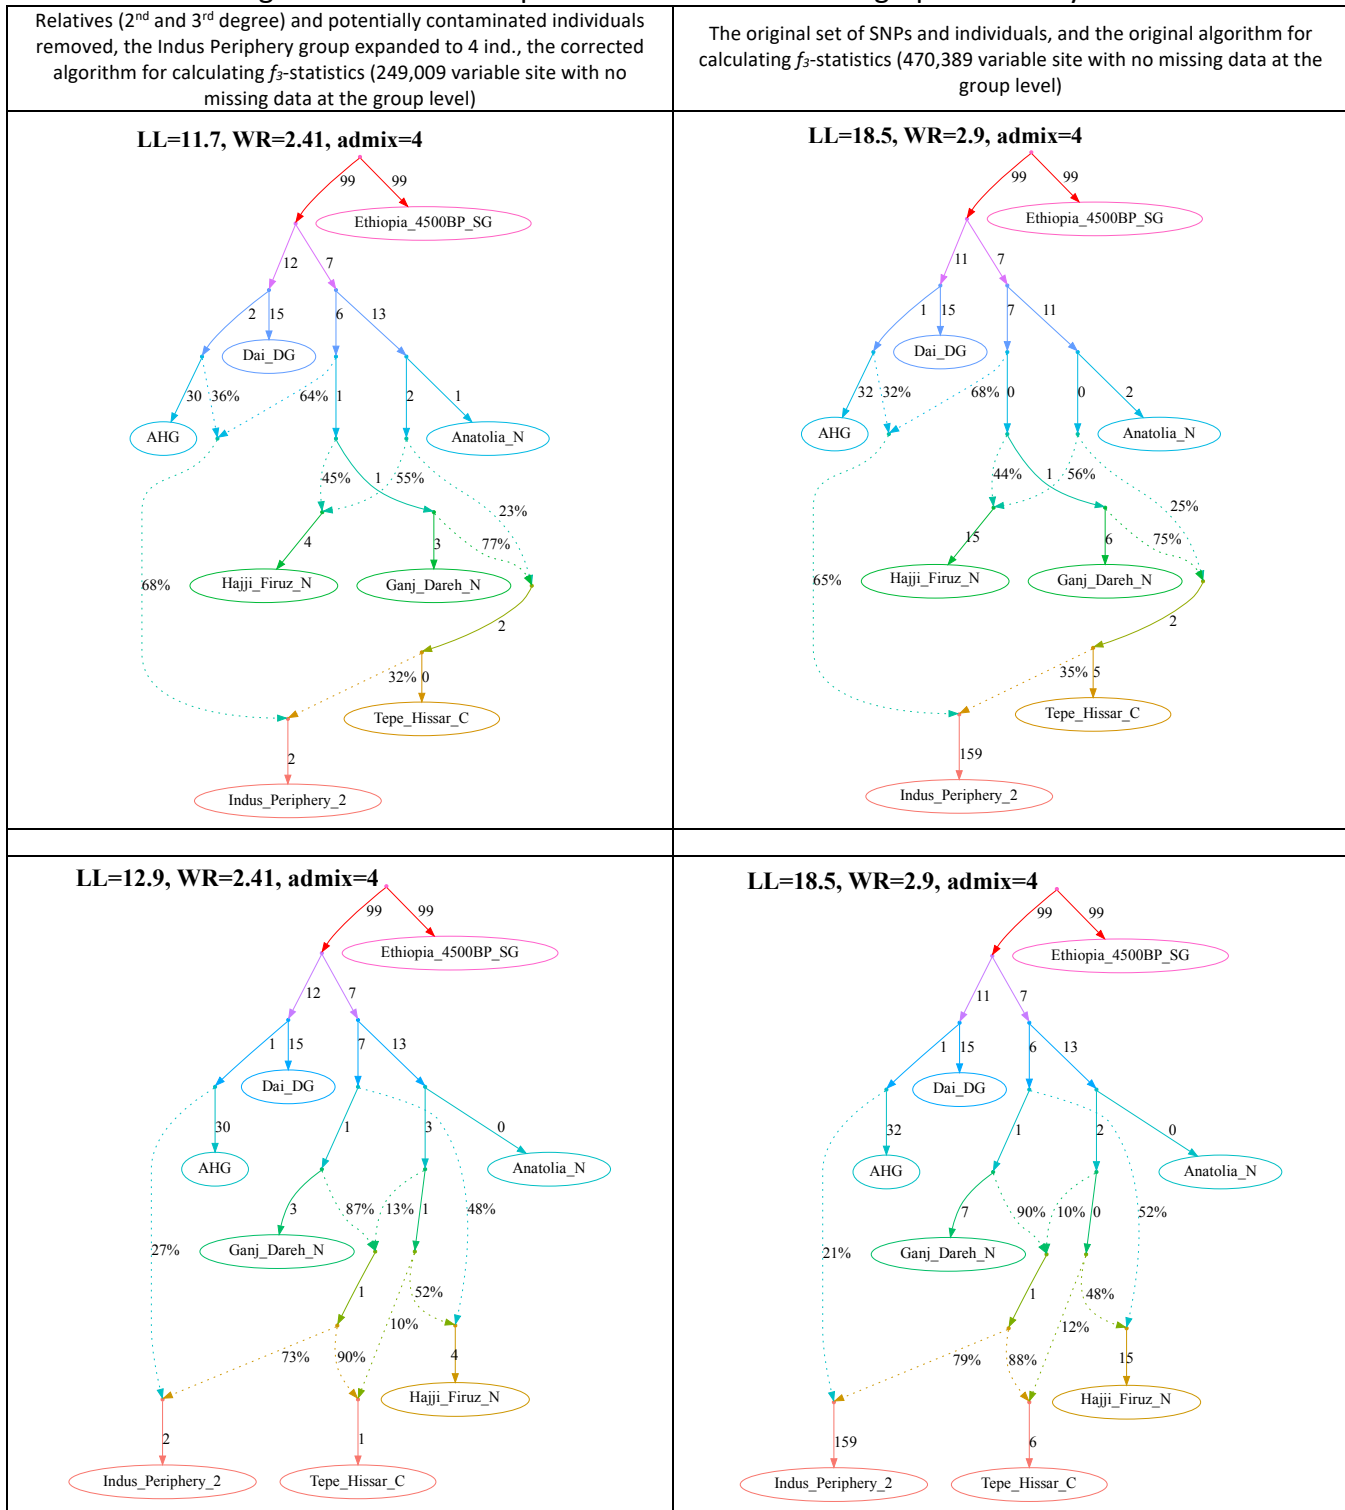

Figure S7

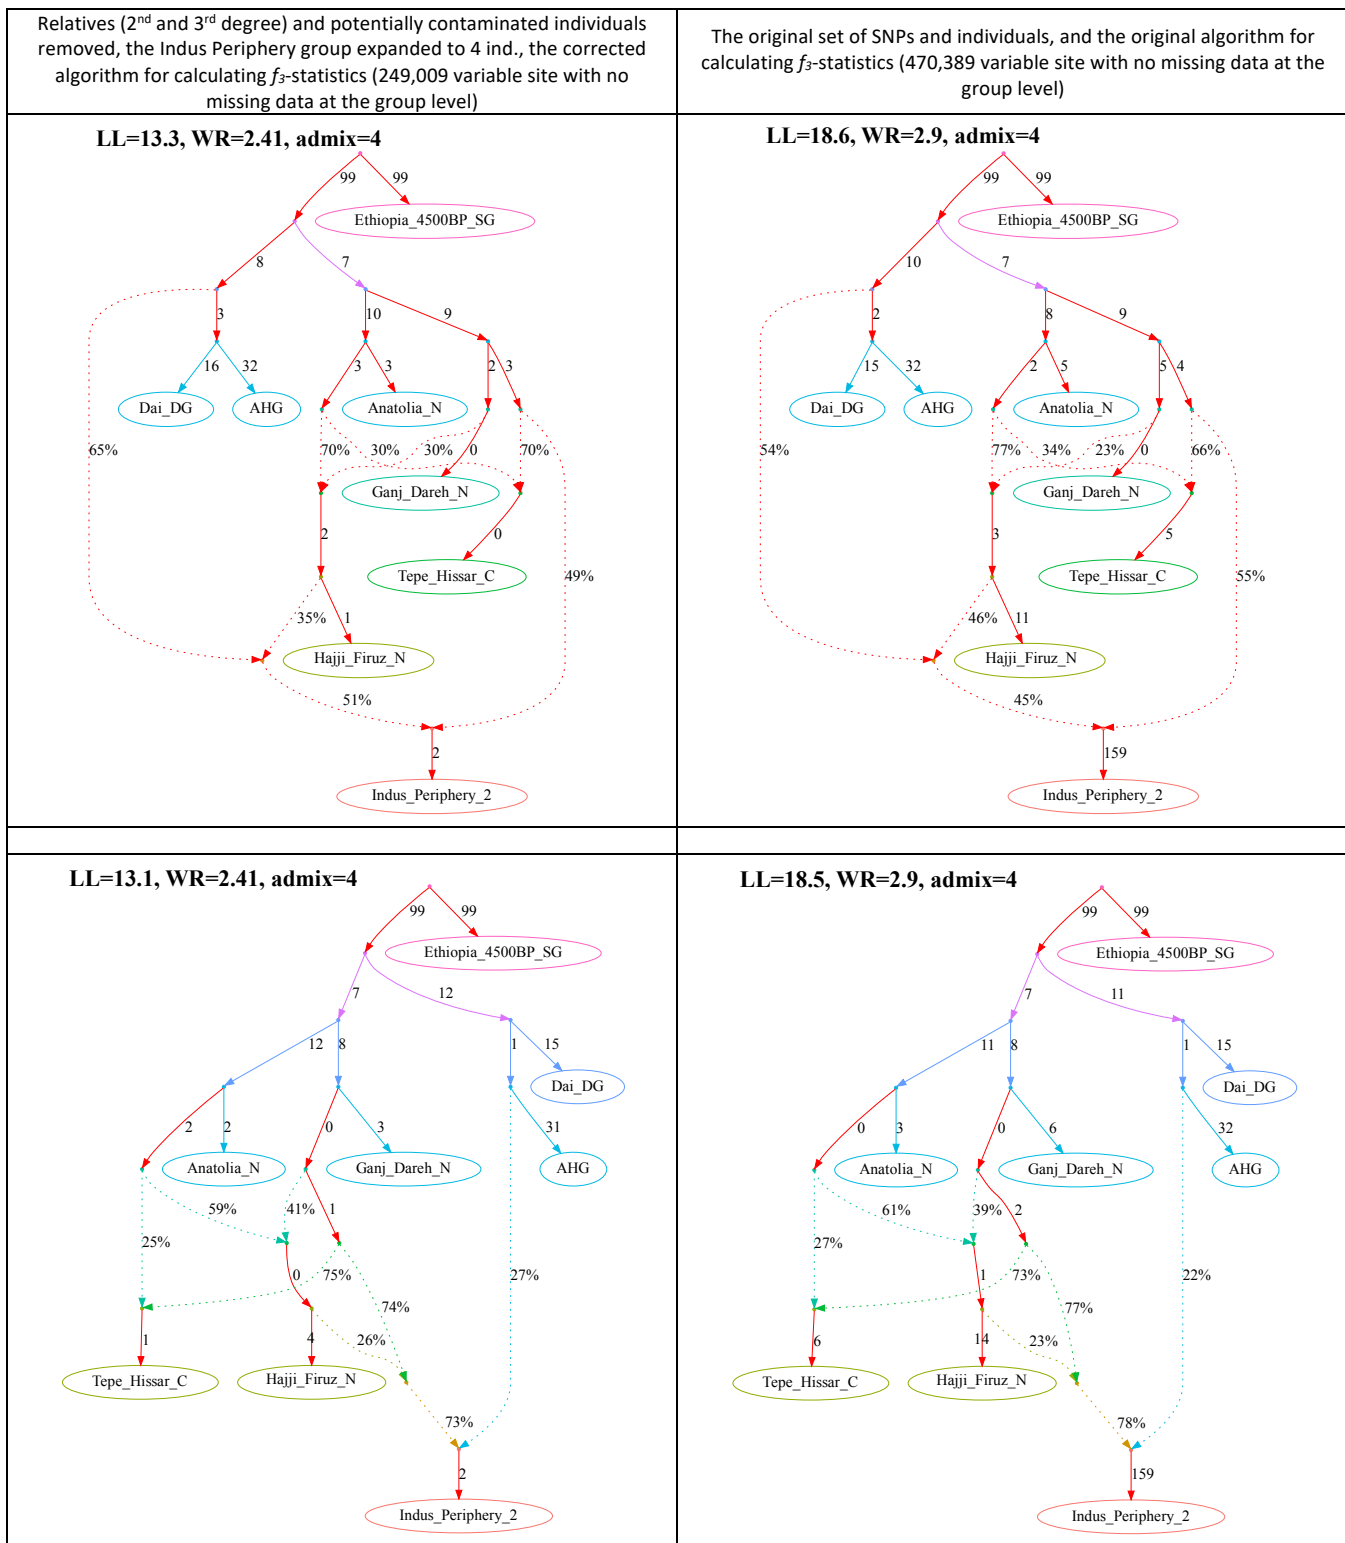

Supplement: supp [file elife-85492-supp-v1.zip]
