# Supplementary material for: On the limits of fitting complex models of population history to f-statistics
Source: eLife journal article supplement (doi:10.7554/elife.85492), 2023-04-14

Figure S4

**Figure S4.** Published admixture graph from Lazaridis *et al.* (2014) and alternative graphs found with *findGraphs* (7 populations, 4 admixture events). Model parameters (graph edges) that were inferred to be unidentifiable are plotted in red.

a, the re-fitted published graph

LL=8.7, WR=2.21, admix=4

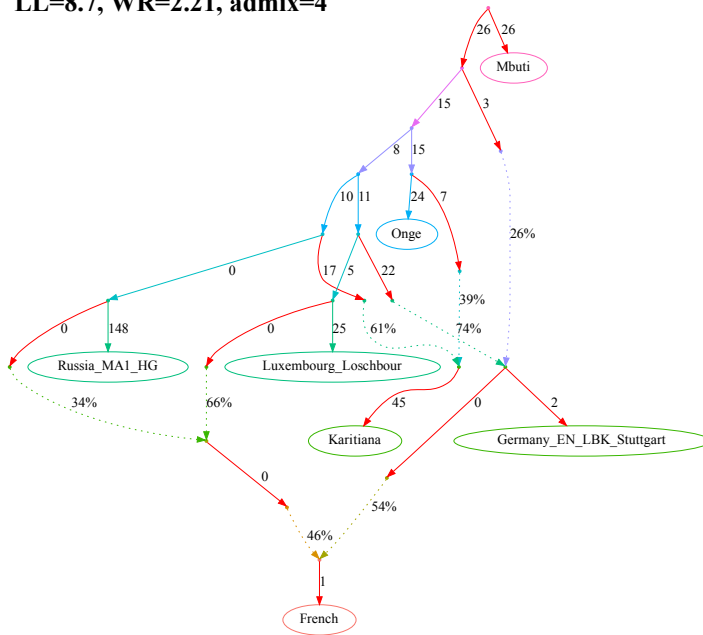

Figure S4

**b**, ten examples of graphs inferred by *findGraphs* (arranged according to LL score) and fitting significantly (the graph framed in blue) or nominally better than the published model.

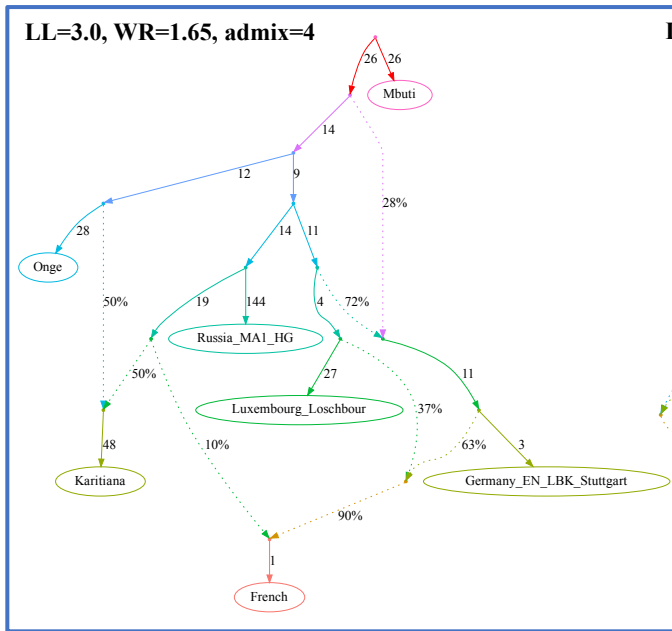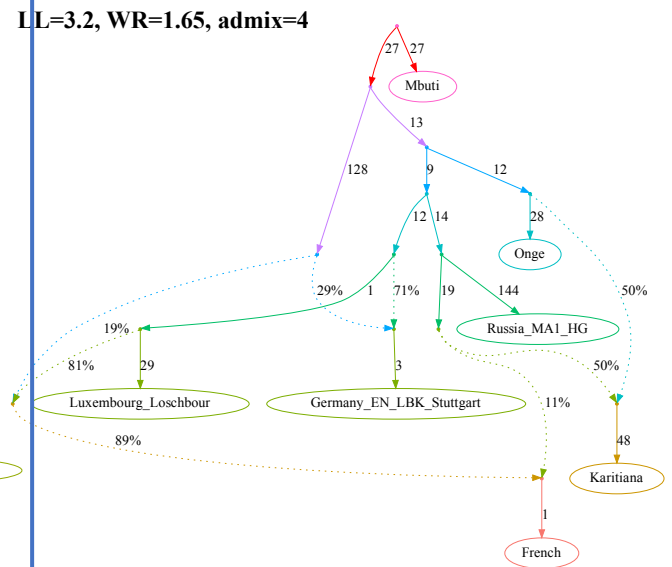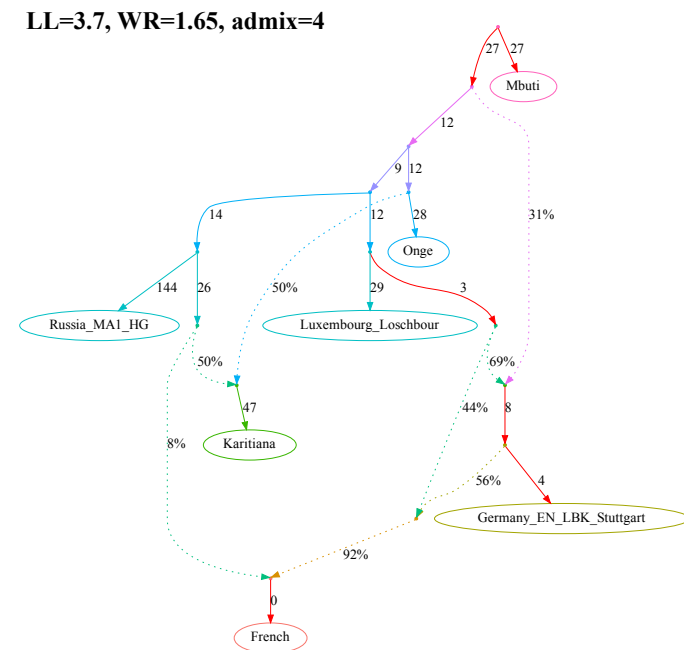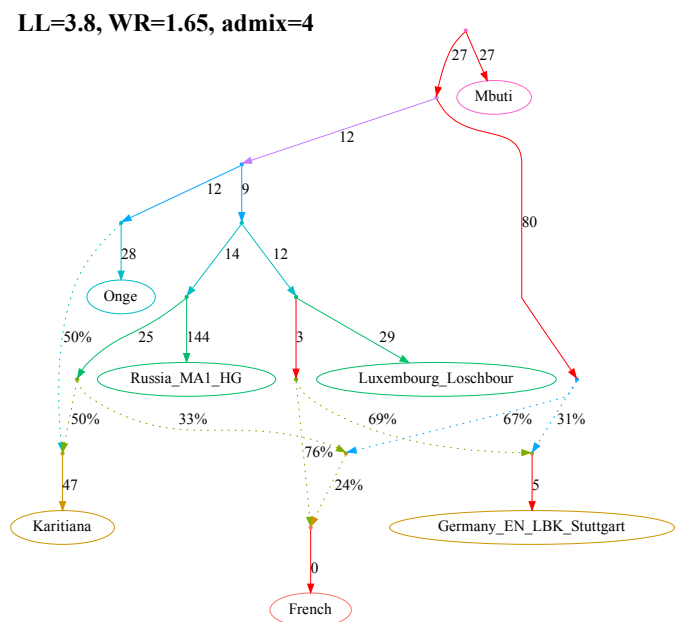

Figure S4

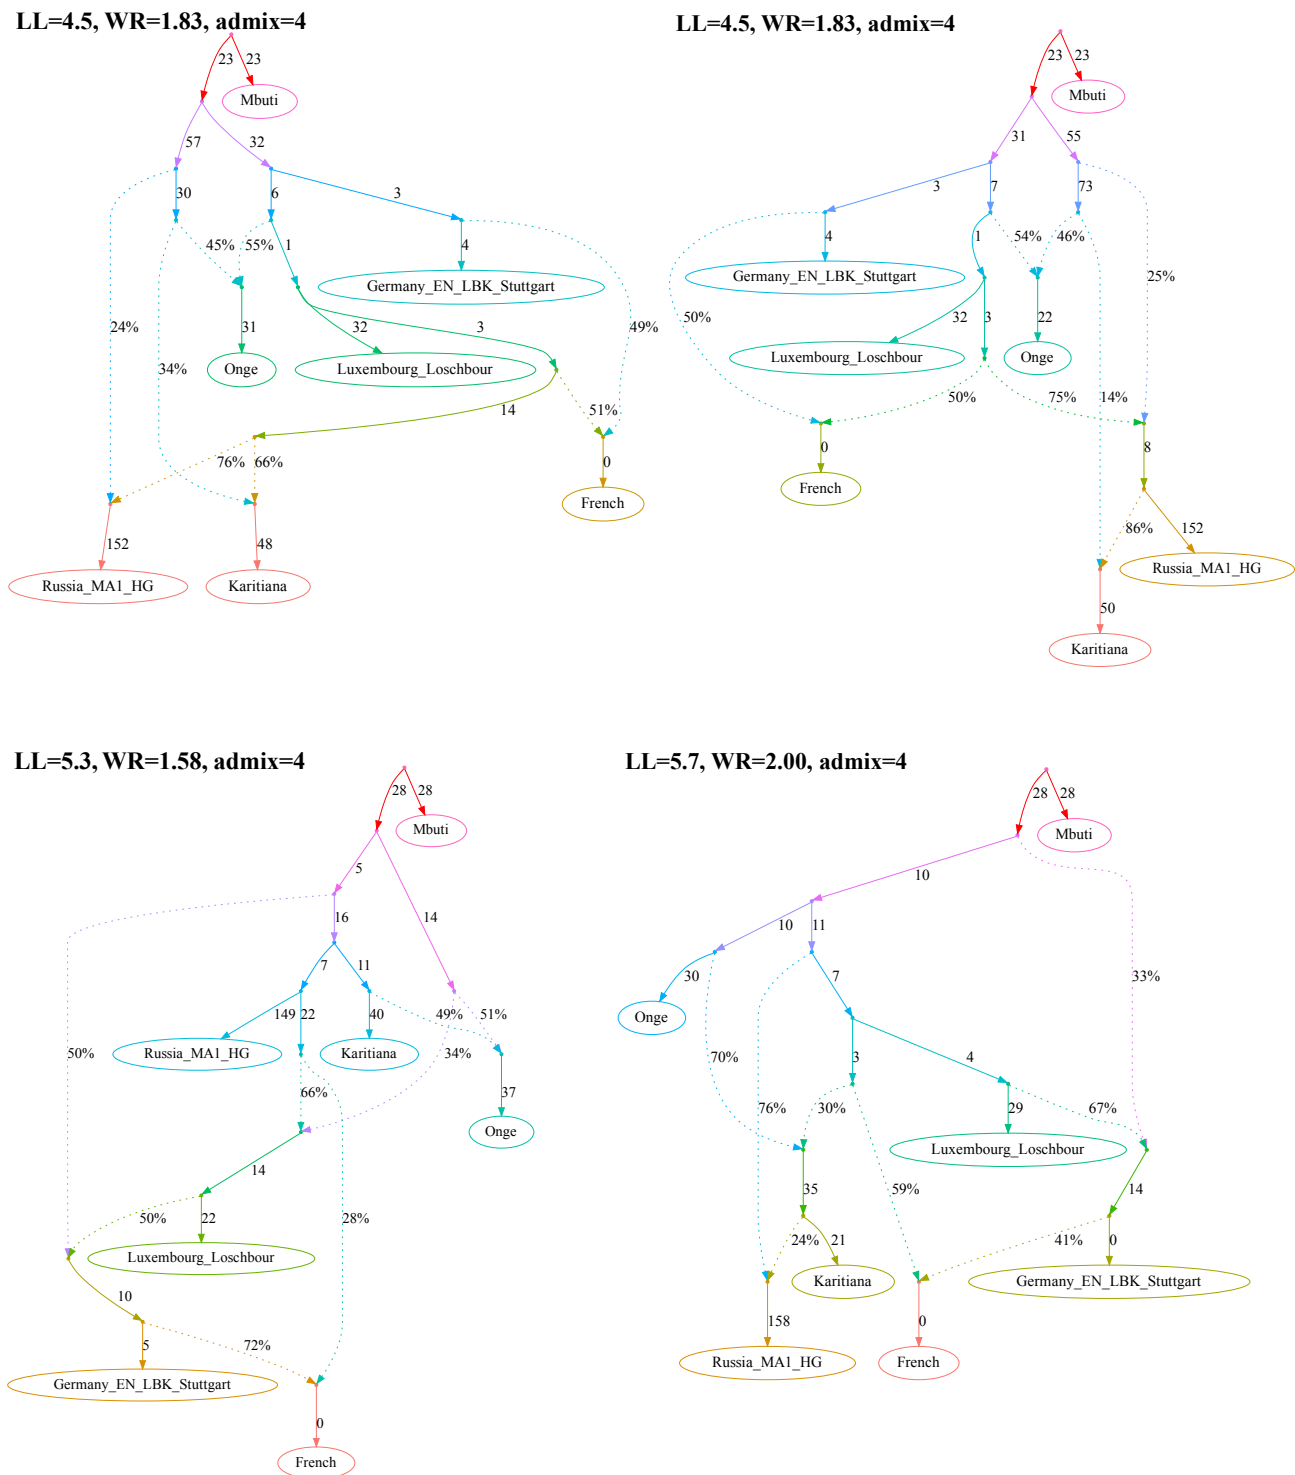

Figure S4

LL=6.2, WR=2.03, admix=4

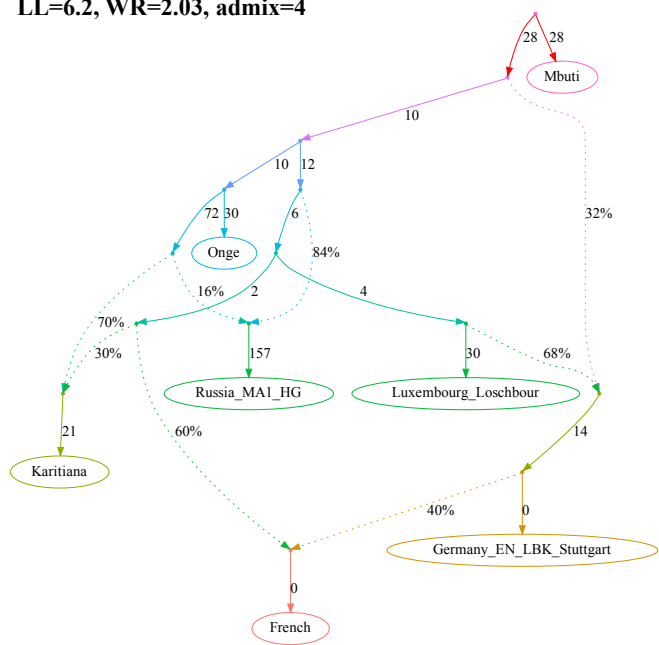

LL=7.2, WR=1.91, admix=4

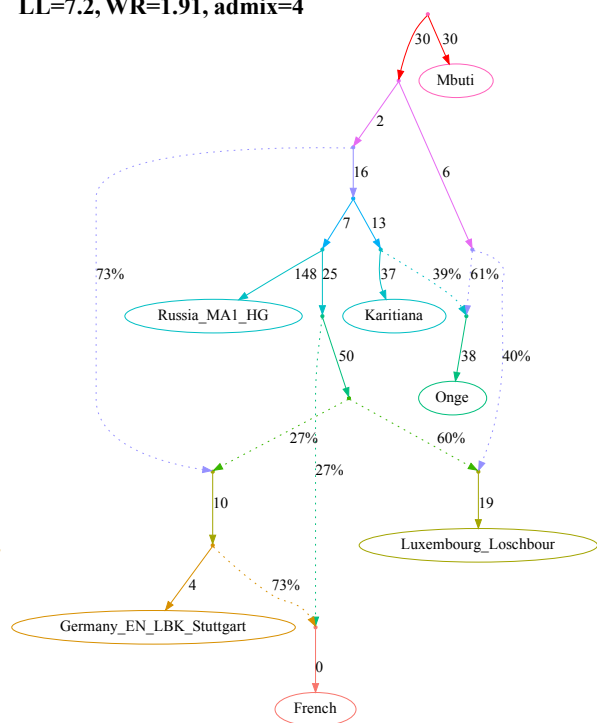

Supplement: supp [file elife-85492-supp-v1.zip]
