# Supplementary material for: On the limits of fitting complex models of population history to f-statistics
Source: eLife journal article supplement (doi:10.7554/elife.85492), 2023-04-14

Figure S2

**Figure S2.** The published (Bergström et al. 2020) and alternative admixture graphs for dogs found with *findGraphs*. Model parameters (graph edges) that were inferred to be unidentifiable are plotted in red.

a, published model

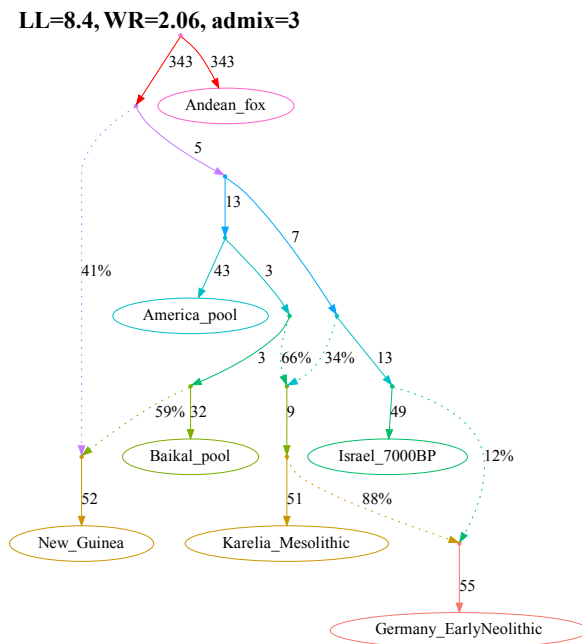

the best model corresponding perfectly to the human history

**LL=2.4,WR=0.95,admix=3**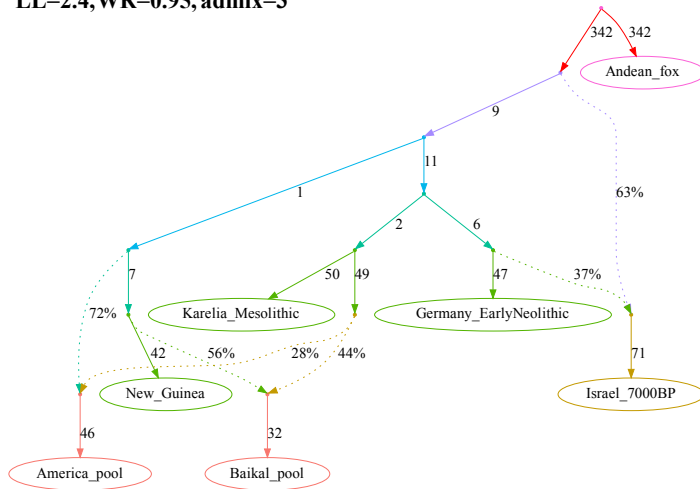

LL=4.0, WR=1.48, admix=3

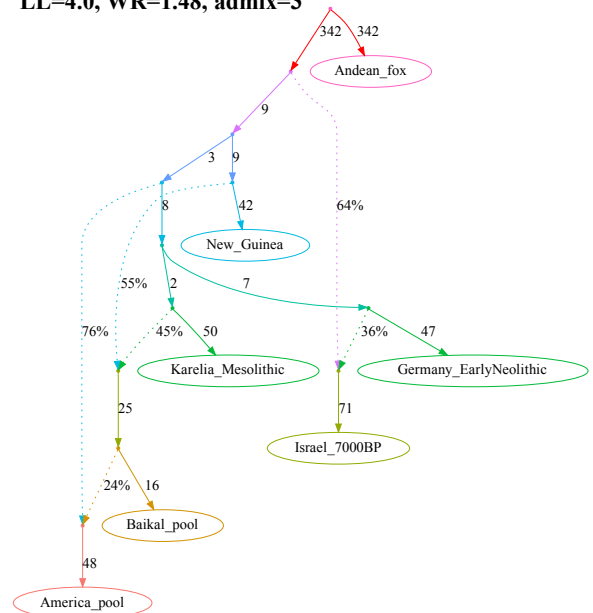

LL=5.7, WR=2.04, admix=3

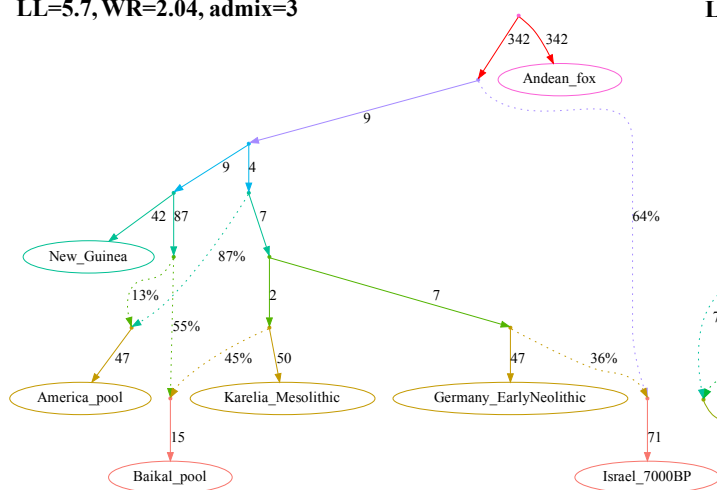

LL=6.7, WR=2.04, admix=3

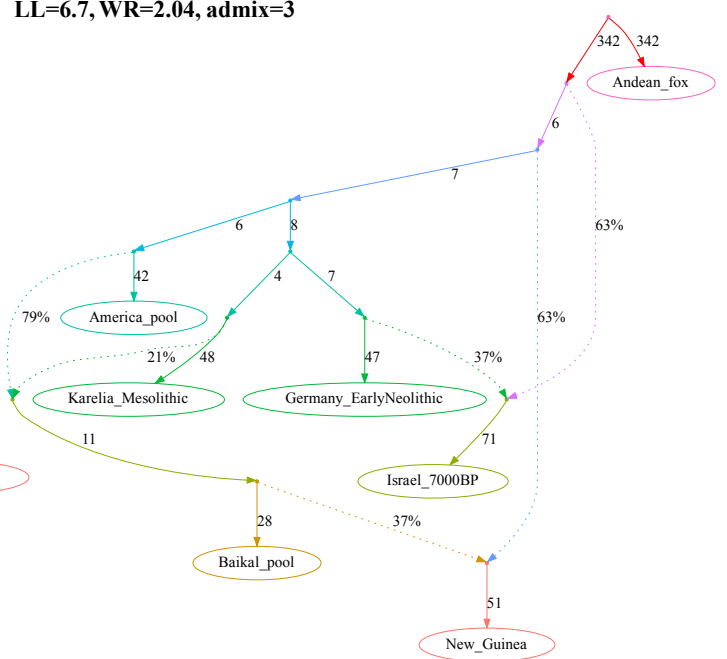

Figure S2

**d**, alternative models fitting nominally or significantly (the graph framed in blue) better than the published one, sorted by the fit score

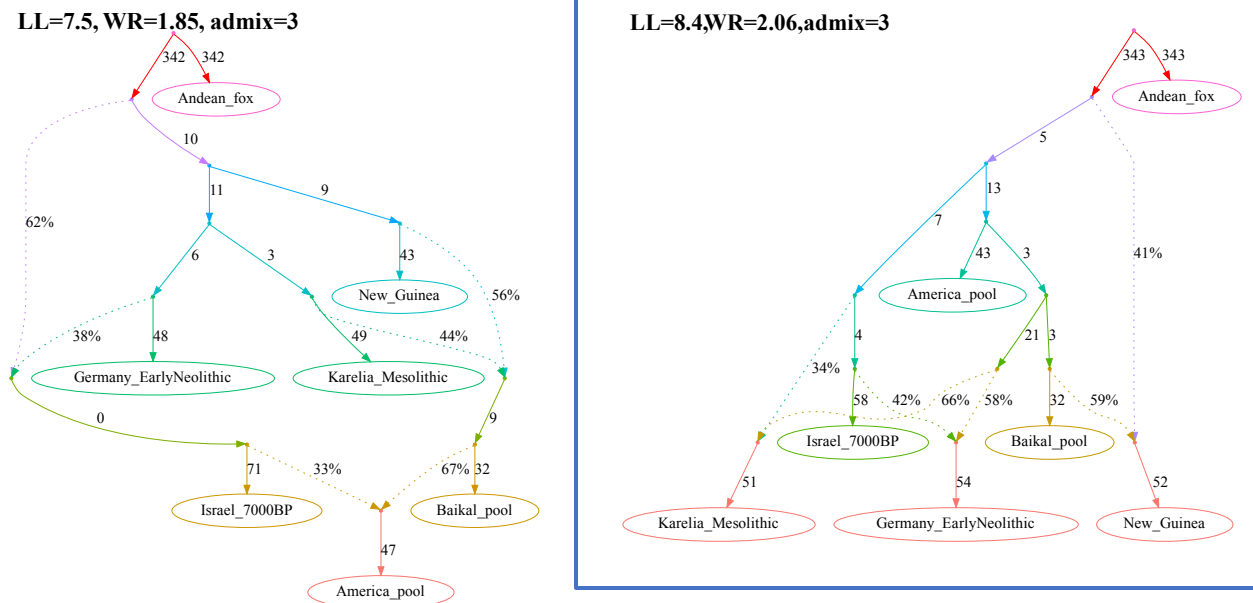

Supplement: supp [file elife-85492-supp-v1.zip]
