# Supplementary material for: On the limits of fitting complex models of population history to f-statistics
Source: eLife journal article supplement (doi:10.7554/elife.85492), 2023-04-14
Supplement: supp [file elife-85492-supp-v1.zip]

**Figure S1.** The admixture graphs compared in **Figure 1a**.
