# Supplementary material for: On the limits of fitting complex models of population history to f-statistics
Source: eLife. 2023 Jun 29;12:e85492. doi: 10.7554/eLife.85492 (PMC10310323; doi:10.7554/eLife.85492)
Supplement: Supplementary file 1. — We compared 22 different graphs from 8 publications to alternative graphs inferred on the same or very similar data; these findGraphs runs are highlighted in blue in the ‘Iterations’ column. In total, 51 findGraphs runs are summarized here since in some cases models more complex or less complex than the published one were explored and/or different population compositions were tested (see the ‘Topology search constraints and population modifications’ column and the footnotes for details). The columns with names in blue show various information on the published graphs or their modified versions and some properties of the published population sets. The columns with names in magenta show settings used for calculating f-statistics and for exploring the AG space, and the number of SNPs used that depends on them. The columns with names in black summarize the outcomes of findGraphs runs, that is, the properties of alternative model sets found. Publication: Last name of the first author and year of the relevant publication. Figure in the original publication: Figure number in the original paper where the AG is presented. Groups (populations): The number of populations in each graph. Singleton pseudo-haploid populations: The number of populations in the graph composed of a single pseudo-haploid individual. Calculation of negative ‘admixture’ f3-statistics is impossible for such populations since their heterozygosity cannot be estimated (see the text for details). No. of negative f3-stats (allsnps: YES): The number of negative f3-statistics among all possible f3-statistics for a given set of populations when all available sites are used for each statistic. If no negative f3-statistics exist for a set of populations, AG fits are not affected by the ‘minac2=2’ setting intended for accurate calculation of f-statistics for non-singleton pseudo-haploid groups. Admixture events: The number of admixture events in each graph. Publ. model: log-likelihood (LL): Log-likelihood score of t [file elife-85492-supp1.xlsx]

## Sheet: Supplementary file 1
Publication	Figure in the original publication	Groups (populations)	Singleton pseudo-diploid populations	No. of negative f3-stats (allsnps: YES)	Admixture events	Publ. model: log-likelihood (LL)	Publ. model: LL, median of bootstrap distr.	Publ. model: worst residual (WR), SE	SNPs used	Settings for calculating f2-statistics	Topology search constraints and population modifications	Iterations	Iterations confirming published graph	Distinct alternative topologies found⁽¹⁾	Significantly better fitting topologies⁽¹⁾	Non-significantly better fitting topologies⁽¹⁾	Non-significantly worse fitting topologies⁽¹⁾	Significantly worse fitting topologies⁽¹⁾	Significantly better fitting topologies, %⁽¹⁾	Non-significantly better fitting topologies, %⁽¹⁾	Non-significantly worse fitting topologies, %⁽¹⁾	Significantly worse fitting topologies, %⁽¹⁾	P-value best alternative vs. publ.	Used in Table 1
Bergström et al. 2020	1e	6	4	0	2	4.7	4.9		312282	maxmiss=0, blg_size=4000000, adjust_pseudohaploid=T	Andean Fox OG	100	38	14	0	0	3	11	0	0	21.4286	78.5714	0.060*
		7	5	0	3	8.4	11.8	2.1				10000	337	221	1	5	37	178	0.452489	2.26244	16.7421	80.543	0.332	yes
Lazaridis et al. 2014	3	6	1	6	2	3.02	4.18		624583	maxmiss=0, blg_size=0.05, adjust_pseudohaploid=T, minac2=2	Mbuti OG	100	32	14	0	0	0	14	0	0	0	100	0.032*
		7	1	6	4	8.7	11.1	2.2	642247			1000	0	306	3	37	247	19	0.980392	12.0915	80.719	6.20915	0.032	yes
Shinde et al. 2019	3	9	3	6	3	22.1	40.9	2.8	19017	maxmiss=0, blg_size=0.05, adjust_pseudohaploid=T	Mota OG (4)	4000	0	398	0	89	266	43	0	22.3618	66.8342	10.804	0.136
		8	2	2	3	29	40.8	3.2	470389			4000	0	216	4	61	79	72	1.85185	28.2407	36.5741	33.3333	0.072
		8	1	10	3	17.9	28.2	2.6	249009	maxmiss=0, blg_size=0.05, adjust_pseudohaploid=T, minac2=2	Mota OG; Indus_Periphery group expanded to 4 ind., relatives and contaminated ind. removed	4000	13	143	0	4	5	134	0	2.7972	3.4965	93.7063	0.088*	yes
		8			4	N/A	N/A	N/A				4000	N/A	443	N/A	N/A	N/A	N/A	N/A	N/A	N/A	N/A	N/A
Librado et al. 2021	3b	10	3	3	3	907.3	942	28.3	6343116	maxmiss=0, blg_size=4000000, adjust_pseudohaploid=T	Donkey OG; group composition was altered: for all populations individuals from only one archaeological site and temporal horizon were included	1000	25	335	not tested								0.002
	Ext 5d				4	363.3	386.2	15.7				1000	10	531									0.016
	Ext 5e				5	267.7	286.5	10.4				1000	0	747									0.002
	N/A				6	N/A	N/A	N/A				1000	N/A	894	N/A	N/A	N/A	N/A	N/A	N/A	N/A	N/A	N/A
					7							1000		986
					8							1000		999
					9							1000		1000
	3b	10	3	3	3	679.9	711.1	23.9	1767419	maxmiss=0, blg_size=4000000, adjust_pseudohaploid=T, minac2=2		1000	1	324	22	51	78	173	6.79012	15.7407	24.0741	53.3951	0.04	yes
	Ext 5d				4	202.8	224.4	14.1				1000	30	535	0	0	24	511	0	0	4.48598	95.514	0.788*	yes
	Ext 5e				5	121	139.6	6.9				1000	3	784	0	2	223	559	0	0.255102	28.4439	71.301	0.72	yes
	N/A				6	N/A	N/A	N/A				1000	N/A	954	N/A	N/A	N/A	N/A	N/A	N/A	N/A	N/A	N/A
					7							1000		995
					8							1000		1000
					9							1000		1000
	3b	10	1	1	3	1132.8	1162.6	33.8	7403037	maxmiss=0, blg_size=4000000, adjust_pseudohaploid=T	Donkey OG	1000	0	363	not tested								0.002
	Ext 5d				4	477.1	500.5	16.3				1000	3	567									0.002
	Ext 5e				5	380.5	395	13.2				1000	0	729									0.002
	N/A				6	N/A	N/A	N/A				1000	N/A	906	N/A	N/A	N/A	N/A	N/A	N/A	N/A	N/A	N/A
					7							1000		981
					8							1000		999
					9							1000		998
Hajdinjak et al. 2021	2d	11	5	0	8	35.8	65.1	2.8	283890	maxmiss=0, blg_size=0.05, adjust_pseudohaploid=T	Denisovan OG (4)	4000	0	3996	a fraction of models tested				15.9091	80.8442	3.24675	0	0.008
											Vindija, Mbuti unadmixed, Denisovan max. 1 admix. event	2000	0	1999					26.0479	63.4731	6.58683	3.89222	0.002
		12	6	0	8	71.6	112.4	4.8	263698		Chimp OG	2000	0	1995					56.7568	41.4414	1.8018	0	0.002
											Vindija, Mbuti unadmixed, Denisovan max. 1 admix. event, Chimp OG	2000	0	1988					15.6627	55.7229	6.62651	21.988	0.002	yes
Lipson et al. 2020	S3.24	7	1	0	4	5.4	8.7	1.9	801362	maxmiss=0, blg_size=4000000, adjust_pseudohaploid=F, minac2=2	Chimp OG (4)	2000	0	778	2	199	489	89	0.257069	25.5784	62.8535	11.4396	0.26
	S3.25	10	1	15	8	33.6	51.2	2.7	838910			10000	0	9927	a fraction of models tested				6.84105	83.501	9.05433	0.603622	0.032
	Ext 4	12	2	22	12	29.5	61.6	2.2	363131	maxmiss=0, blg_size=0.05, adjust_pseudohaploid=T	Chimp OG	2000	0	2000	not tested								0.064
					12	21.8	52.3	2.3	211738	maxmiss=0, blg_size=0.05, adjust_pseudohaploid=T, minac2=2	Chimp OG, Altai unadmixed, French min. 1 admix. event	2000	0	2000	a fraction of models tested				0	28.5	68.5	3	0.1
					11	21.8	52.5	2.3				2000	0	2000					0	11.9403	77.1144	10.4478	0.176	yes
Wang et al. 2021	SI3-9 (2)	9	2	0	4	16	29.6	2.5	543124	maxmiss=0, blg_size=0.05, adjust_pseudohaploid=T	Denisovan OG (4)	2000	0	906	a fraction of models tested				0	38.7665	60.793	0.440529	0.524
	SI3-10a (3)	10	3	0	5	23.3	41.8	2.5	544068	maxmiss=0, blg_size=0.05, adjust_pseudohaploid=F		2000	0	1524					0	44.0367	55.9633	0	0.288
	Ext 6	12	3	3	8	62.1	99.2	3.1	496233	maxmiss=0, blg_size=0.05, adjust_pseudohaploid=T	Denisovan OG (4)	1900	0	1895	not tested								0.004
											(Denisovan,(Mbuti,(Loschbour,Onge)))) branching order; Mbuti, Loschbour, Onge unadmixed, Denisovan max 1 admix; Denisovan OG (4)	2000	0	1993									0.004
						66.4	106	3.8	203753	same as above + minac2=2		2000	0	1778	a fraction of models tested				12.5561	84.3049	3.13901	0	0.008	yes
Sikora et al. 2019	3f (left)	13	4	0	10	65.7	116.4	3.2	344903	maxmiss=0, blg_size=0.05, adjust_pseudohaploid=T	Altai, Dinka unadmixed, Denisovan max. 1 admix. event, Chimp OG	1000	0	1000	a fraction of models tested				33.2	13.6	50	3.2	0.002
											Chimp OG	1000	0	996					28.5141	68.6747	2.81124	0	0.002
					6	76.5	132	3.8			Altai, Dinka unadmixed, Denisovan max. 1 admix. event, Chimp OG	1000	0	894					0.33557	17.1141	34.5638	47.9866	0.016	yes
											Chimp OG	1000	0	966					0.0933707	37.037	52.2876	10.582	0.024
	3f (right)	14	2	0	10	85.3	147.8	3.1	613509		Altai, Dinka unadmixed, Denisovan max. 1 admix. event, Chimp OG	1000	0	1000					13.2	30	17.6	39.2	0.002
											Chimp OG	1000	0	1000					26	44.4	15.6	14	0.002
					6	102.4	171.9	4.2			Altai, Dinka unadmixed, Denisovan max. 1 admix. event, Chimp OG	4446	0	2785					0.106862	0.929238	9.757	89.2069	0.112	yes
											Chimp OG	3505	0	2894					0.134348	6.71742	40.3045	52.8437	0.056
(1)	Counting at most one topology per iteration, not double counting topologies found in multipler iterations													published model was recovered
(2)	a 1% gene flow from Loschbour to the Mongolia Neolithic group was dropped from the published model to decrease the complexity of the baseline model. That increased model LL slightly (by 0.5 log-units).
(3)	a 1% gene flow from Loschbour to the Mongolia Neolithic group was dropped from the published model to decrease the complexity of the baseline model. That increased model LL slightly (by 2.4 log-units).
(4)	OG was set for generating random starting graphs, but not for the "find_graphs" algorithm itself
*	here the direction of comparison is reversed since the published model is the highest-ranking among all models found
