# Supplementary material for: On the limits of fitting complex models of population history to f-statistics
Source: eLife. 2023 Jun 29;12:e85492. doi: 10.7554/eLife.85492 (PMC10310323; doi:10.7554/eLife.85492)
Supplement: Supplementary file 2. [file elife-85492-supp2.xlsx]

## Sheet: Supplementary file 1
Statistics for shotgun sequencing of individual I8726
Individual ID	I8726
Archaeological IDs	SHAR_201 (Grave 201)
Skeletal element	Petrous bone
Location	Seistan, Shahr-i-Sokhta, Iran
Archaeological context date	3100-3000 BCE
Latitude	30.6499
Longitude	61.4003
First publication of library	Narasimhan, Patterson et al. Science 2019
Library ID	S8726.E1.L1 (partially UDG-treated)
HiSeqX10 lanes for shotgun sequencing	3
Paired reads	1445907437
Merged sequences	1162395691
Mapping to hg19 reference genome	305652196
After removal of duplicated sequences	153531614
Mean sequence length	42.5 bp
Cytosine-to-thymine deamination rate in final base	0.18
Mean coverage 1240k autosomal targets	2.603
Mean coverage on all of autosomes	2.263
Cytosine-to-thymine deamination rate in final base	0.18
Molecular sex	Male
ANGSD contamination estimate (95% CI)	0.34% - 0.61%
ENA accession number	PRJEB58199
