# Supplementary material for: On the limits of fitting complex models of population history to f-statistics
Source: eLife. 2023 Jun 29;12:e85492. doi: 10.7554/eLife.85492 (PMC10310323; doi:10.7554/eLife.85492)
Supplement: Supplementary file 3. — See the ‘Comment’ column for a list of updates to the dataset composition we performed prior to admixture graph fitting in our study. [file elife-85492-supp3.xlsx]

## Sheet: Supplementary file 3
Version ID	Master ID	Analysis label	Date mean in YBP	Full date	Locality	Country	Latitude	Longitude	Data source	SNPs hit on autosomal targets	Sex	Family ID and position within family	Damage rate in first nucleotide on sequences overlapping 1240k targets (merged data)	Sex ratio [Y/(Y+X) counts] (merged data)	Xcontam ANGSD SNPs (only if male)	Xcontam ANGSD MOM point estimate (only if male and ≥200)	Xcontam ANGSD MOM Z-score (only if male and ≥200)	Xcontam ANGSD MOM 95% CI truncated at 0 (only if male and ≥200)	contamLD est	contamLD s.e.	contamLD warning	contamLD s.e.	Library type (minus=no.damage.correction, half=damage.retained.at.last.position, plus=damage.fully.corrected, ds=double.stranded.library.preparation, ss=single.stranded.library.preparation)	endogenous by library (computed on shotgun data)	1240k coverage (by library)	Damage rate in first nucleotide on sequences overlapping 1240k targets (by library)	mtDNA coverage (by library)	mtDNA haplogroup if ≥2 coverage (by library)	mtDNA match to consensus if ≥2 coverage (by library)	Contamination assessment	Comment
BR_Onge-1.DG	Onge14	AHG	0	present	Andaman and Nicobar	India	11.6667	92.65	Shotgun.diploid	1112423	F	n/a (no relatives detected)	..	..	n/a (female)	n/a (female)	n/a (female)	n/a (female)	..	..	..	..	..	..	42.38	..	..	..	..	PASS
BR_Onge-2.DG	Onge3	AHG	0	present	Andaman and Nicobar	India	11.6667	92.65	Shotgun.diploid	1117446	F	n/a (no relatives detected)	..	..	n/a (female)	n/a (female)	n/a (female)	n/a (female)	..	..	..	..	..	..	40.77	..	..	..	..	PASS
I0708	I0708	Anatolia_N	8101	6224-6074 calBCE (7285±30 BP, PSUAMS-2103)	Northwest Anatolia, Marmara, Barcın	Turkey	40.3037	29.57	1240K	960649	M	n/a (no relatives detected)	0.211	0.524	..	..	..	..	-0.005	0.002	None	[0,0]	ds.half	0.569	6.948	0.211	762	N1b1a	[0.977,0.987]	PASS
I0709	I0709	Anatolia_N	8085	6223-6034 calBCE (7255±30 BP, PSUAMS-2952)	Northwest Anatolia, Marmara, Barcın	Turkey	40.3037	29.57	1240K	967754	M	n/a (no relatives detected)	0.15	0.529	..	..	..	..	-0.005	0.003	None	[0,0.001]	ds.half	0.2854	9.765	0.15	1100	U3	[0.993,0.998]	PASS
I0723	I0723	Anatolia_N	7870	6008-5835 calBCE (7035±35 BP, PSUAMS-1965)	Marmara, Yenişehir, Menteşe	Turkey	40.26	29.65	1240K	690264	M	n/a (no relatives detected)	..	..	..	0.005584	1.52144	[0,0.013]	-0.002	0.007	None	[0,0.012]	ds.half,ds.half,ds.half,ds.half	0.01810,0.01410,0.01010,0.00320	0.168,0.120,0.314,..	0.162,0.136,0.143,0.138	45.90,251.00,219.00,93.00	X2m,X2m,X2m,X2m	[0.992,0.999],[0.998,1.000],[0.998,1.000],[0.996,1.000]	PASS
I0724	I0724	Anatolia_N	7950	6400-5600 BCE	Marmara, Yenişehir, Menteşe	Turkey	40.26	29.65	1240K	231480	M	n/a (no relatives detected)	..	..	..	0.022038	0.870699	[0,0.072]	0.006	0.024	None	[0,0.053]	ds.half,ds.half,ds.half	0.00320,0.00170,0.00240	0.010,0.086,..	0.156,0.147,0.148	412.00,95.60,276.00	K1a4,K1a4,K1a4	[0.978,0.988],[0.969,0.983],[0.968,0.983]	PASS
I0725	I0725	Anatolia_N	7950	6400-5600 BCE	Menteşe	Turkey	40.26	29.65	1240K	43286	F	n/a (no relatives detected)	0.091	0.017	n/a (female)	n/a (female)	n/a (female)	n/a (female)	0.102	0.048	None	[0.008,0.196]	ds.half	0.0056	0.038	0.091	104	N1a1a	[0.993,0.998]	REPLOT_PASS
I0726	I0726	Anatolia_N	7950	6400-5600 BCE	Menteşe	Turkey	40.26	29.65	1240K	228316	F	n/a (no relatives detected)	..	..	n/a (female)	n/a (female)	n/a (female)	n/a (female)	0.034	0.018	None	[0,0.069]	ds.half,ds.half,ds.half	0.01380,0.02080,0.01910	0.022,0.040,0.025	0.139,0.127,0.163	61.70,123.00,131.00	H,H,H	[0.995,1.000],[0.993,1.000],[0.997,1.000]	REPLOT_PASS
I0727	I0727	Anatolia_N	7950	6400-5600 BCE	Marmara, Yenişehir, Menteşe	Turkey	40.26	29.65	1240K	180683	M	n/a (no relatives detected)	..	..	..	-0.004852	-0.970414	[0,0.005]	0.022	0.03	None	[0,0.081]	ds.half,ds.half,ds.half	0.02040,0.00740,0.00700	0.010,0.068,0.074	0.136,0.129,0.135	41.50,79.20,95.00	K1a2,K1a2,K1a2	[0.974,0.988],[0.997,1.000],[0.995,0.999]	PASS
I0736	I0736	Anatolia_N	8300	6500-6200 BCE	Northwest Anatolia, Marmara, Barcın	Turkey	40.3037	29.57	1240K	798920	F	Turkey, Northwest Anatolia, Marmara, Barcın Family A (2 members) (I0854-I0736 are 1st degree relatives)	0.174	0.008	n/a (female)	n/a (female)	n/a (female)	n/a (female)	-0.004	0.005	None	[0,0.006]	ds.half	0.0386	2.248	0.174	770	N1a1a+152	[0.993,0.998]	PASS
I0744	I0744	Anatolia_N	8270	6400-6239 calBCE (7455±30 BP, PSUAMS-2299)	Northwest Anatolia, Marmara, Barcın	Turkey	40.3037	29.57	1240K	868288	M	Turkey, Northwest Anatolia, Marmara, Barcın Family B (2 members) (I1097-I0744 are 2nd or 3rd degree relatives)	0.219	0.538	..	..	..	..	-0.007	0.006	None	[0,0.005]	ds.half	0.1944	2.39	0.219	564	J1c11	[0.990,0.998]	PASS
I0745	I0745	Anatolia_N	8243	6387-6111 calBCE (7405±30 BP, PSUAMS-2105)	Northwest Anatolia, Marmara, Barcın	Turkey	40.3037	29.57	1240K	976532	M	n/a (no relatives detected)	0.217	0.542	..	..	..	..	-0.003	0.002	None	[0,0.001]	ds.half	0.4063	7.785	0.217	644	U8b1b1	[0.990,0.997]	PASS
I0746	I0746	Anatolia_N	7928	6070-5888 calBCE (7110±50 BP, Poz-82177)	Northwest Anatolia, Marmara, Barcın	Turkey	40.3037	29.57	1240K	983405	M	n/a (no relatives detected)	0.15	0.537	..	..	..	..	0.001	0.004	None	[0,0.009]	ds.half	0.2149	8.465	0.15	1100	K1a	[0.989,0.995]	PASS
I1096	I1096	Anatolia_N	8300	6500-6200 BCE	Northwest Anatolia, Marmara, Barcın	Turkey	40.3037	29.57	1240K	743953	M	n/a (no relatives detected)	0.184	0.42	3597	0.005182	3.77552	[0.002,0.008]	0.001	0.005	None	[0,0.011]	ds.half	0.212	2.865	0.184	531	N1a1a+152	[0.997,1.000]	PASS
I1097	I1097	Anatolia_N	8282	6420-6245 calBCE (7475±30 BP, PSUAMS-2297)	Northwest Anatolia, Marmara, Barcın	Turkey	40.3037	29.57	1240K	740869	M	Turkey, Northwest Anatolia, Marmara, Barcın Family B (2 members) (I1097-I0744 are 2nd or 3rd degree relatives)	0.162	0.421	2908	0.008951	4.44718	[0.005,0.013]	-0.002	0.006	None	[0,0.01]	ds.half	0.1385	2.125	0.162	399	W1+119	[0.991,0.997]	PASS	removed as a relative
I1098	I1098	Anatolia_N	8282	6419-6246 calBCE (7475±25 BP, PSUAMS-2947)	Northwest Anatolia, Marmara, Barcın	Turkey	40.3037	29.57	1240K	780305	F	n/a (no relatives detected)	0.163	0.013	n/a (female)	n/a (female)	n/a (female)	n/a (female)	-0.006	0.006	None	[0,0.006]	ds.half	0.3384	2.994	0.163	393	X2d	[0.994,0.999]	PASS
I1099	I1099	Anatolia_N	8300	6500-6200 BCE	Northwest Anatolia, Marmara, Barcın	Turkey	40.3037	29.57	1240K	534896	M	n/a (no relatives detected)	0.185	0.425	781	0.01152	2.29301	[0.002,0.021]	-0.003	0.007	None	[0,0.011]	ds.half	0.1853	0.827	0.185	376	T2	[0.997,1.000]	REPLOT_PASS
I1100	I1100	Anatolia_N	8300	6500-6200 BCE	Northwest Anatolia, Marmara, Barcın	Turkey	40.3037	29.57	1240K	294167	F	n/a (no relatives detected)	0.231	0.009	n/a (female)	n/a (female)	n/a (female)	n/a (female)	-0.02	0.012	None	[0,0.004]	ds.half	0.0257	0.331	0.231	163	K	[0.965,0.979]	REPLOT_PASS
I1101	I1101	Anatolia_N	8300	6500-6200 BCE	Northwest Anatolia, Marmara, Barcın	Turkey	40.3037	29.57	1240K	650487	M	n/a (no relatives detected)	0.203	0.429	2011	0.007422	3.22282	[0.003,0.012]	0.009	0.005	None	[0,0.019]	ds.half	0.202	1.56	0.203	798	T2b	[0.997,1.000]	PASS
I1102	I1102	Anatolia_N	8300	6500-6200 BCE	Northwest Anatolia, Marmara, Barcın	Turkey	40.3037	29.57	1240K	408060	M	n/a (no relatives detected)	0.244	0.431	448	0.018832	2.3375	[0.003,0.035]	-0.009	0.012	None	[0,0.015]	ds.half	0.0553	0.55	0.244	152	K1a3a	[0.997,1.000]	REPLOT_PASS
I1103	I1103	Anatolia_N	8300	6500-6200 BCE	Northwest Anatolia, Marmara, Barcın	Turkey	40.3037	29.57	1240K	596670	M	n/a (no relatives detected)	0.213	0.425	1303	0.005283	1.85265	[0,0.011]	-0.011	0.008	None	[0,0.005]	ds.half	0.1165	1.135	0.213	237	K1b1b1	[0.996,1.000]	REPLOT_PASS
I1580	I1580	Anatolia_N	8205	6381-6088 calBCE (7385±40 BP, PSUAMS-1964)	Northwest Anatolia, Marmara, Barcın	Turkey	40.3037	29.6085	1240K	974066	F	n/a (no relatives detected)	0.113	0.012	n/a (female)	n/a (female)	n/a (female)	n/a (female)	0	0.003	None	[0,0.006]	ds.half	0.4805	4.906	0.113	253	H5	[0.985,0.997]	PASS
I1581	I1581	Anatolia_N	8252	6386-6228 calBCE (7415±30 BP, PSUAMS-2104)	Northwest Anatolia, Marmara, Barcın	Turkey	40.3037	29.6085	1240K	891446	F	n/a (no relatives detected)	0.149	0.01	n/a (female)	n/a (female)	n/a (female)	n/a (female)	0.004	0.004	None	[0,0.012]	ds.half	0.4274	3.763	0.149	414	U3	[0.981,0.991]	PASS
I1583	I1583	Anatolia_N	8273	6424-6233 calBCE (7460±50 BP, Poz-82231)	Northwest Anatolia, Marmara, Barcın	Turkey	40.3037	29.6085	1240K	1000004	M	n/a (no relatives detected)	0.13	0.41	4941	0.00893	6.2382	[0.006,0.012]	0.004	0.003	None	[0,0.01]	ds.half	0.6602	13.544	0.13	592	K1a2	[0.989,0.996]	PASS
I2312_all_d	I2312	Belt_Cave_M	11950	12000-8000 BCE	Alborz Mountains, near Behshahr, Belt Cave	Iran	35.591	53.501	1240K	50709	M	n/a (no relatives detected)	0.817	0.411	7	n/a (<200 SNPs)	n/a (<200 SNPs)	n/a (<200 SNPs)	0.189	0.029	Very_High_Contamination	[0.132,0.246]	ds.minus,ds.half,ds.half,ds.half,ds.half,ds.half,ds.half	..,..,..,..,..,..,..	..	..	..	..	..	PASS	removed in some analyses due to low coverage
A_Dai-5.DG	HGDP01307	Dai.DG	0	present	..	China	21	100	Shotgun.diploid	1150277	M	n/a (no relatives detected)	..	..	..	..	..	..	..	..	..	..	..	..	..	..	..	..	..	PASS
B_Dai-4.DG	HGDP01308	Dai.DG	0	present	..	China	21	100	Shotgun.diploid	1117410	M	n/a (no relatives detected)	..	..	..	..	..	..	..	..	..	..	..	..	39.22	..	..	..	..	PASS
S_Dai-1.DG	HGDP01314	Dai.DG	0	present	..	China	21	100	Shotgun.diploid	1119088	F	n/a (no relatives detected)	..	..	n/a (female)	n/a (female)	n/a (female)	n/a (female)	..	..	..	..	..	..	49.51	..	..	..	..	PASS
S_Dai-2.DG	HGDP01312	Dai.DG	0	present	..	China	21	100	Shotgun.diploid	1119289	M	n/a (no relatives detected)	..	..	..	..	..	..	..	..	..	..	..	..	39.75	..	..	..	..	PASS
S_Dai-3.DG	HGDP01315	Dai.DG	0	present	..	China	21	100	Shotgun.diploid	1107190	F	n/a (no relatives detected)	..	..	n/a (female)	n/a (female)	n/a (female)	n/a (female)	..	..	..	..	..	..	39.05	..	..	..	..	PASS
mota.SG	I5950	Ethiopia_4500BP.SG	4470	2576-2465 calBCE (3997±29 BP, OxA-29631)	Gamo Highlands, Mota Cave	Ethiopia	6.79749	38.2079	Shotgun	1149598	M	n/a (no relatives detected)	..	..	..	..	..	..	0	0	Very_High_Contamination	[0,0]	ds.minus	..	..	..	..	..	..	PASS
I1290	I1290	Ganj_Dareh_N	9806	8170-7606 calBCE (8780±50 BP, Poz-81100)	Ganj Dareh	Iran	34.45	48.116	1240K	837872	F	n/a (no relatives detected)	..	..	n/a (female)	n/a (female)	n/a (female)	n/a (female)	-0.003	0.006	None	[0,0.009]	ds.half,ds.half,ds.half,ds.half,ds.half,ds.half	0.02150,0.02350,0.01910,0.08640,0.09710,0.08910	0.378,0.300,0.248,0.322,0.481,0.511	0.212,0.211,0.205,0.166,0.201,0.222	41.80,42.50,37.50,59.30,109.00,110.00	X,X1'2'3,N,X1'2'3,X1'2'3,X1'2'3	[0.960,0.976],[0.961,0.975],[0.963,0.978],[0.971,0.989],[0.990,0.998],[0.978,0.990]	PASS
I1944	I1944	Ganj_Dareh_N	9800	8000-7700 BCE	Ganj Dareh	Iran	34.45	48.116	1240K	60411	F	n/a (no relatives detected)	..	..	n/a (female)	n/a (female)	n/a (female)	n/a (female)	0.093	0.027	None	[0.04,0.146]	ds.half,ds.half,ds.half	0.00530,0.00460,0.01010	0.017,0.020,0.020	0.076,0.109,0.095	2.27,3.07,4.37	R2,R2'JT,R2'JT	[0.887,0.947],[0.855,0.927],[0.950,0.987]	PASS
I1945	I1945	Ganj_Dareh_N	9800	8000-7700 BCE	Ganj Dareh	Iran	34.45	48.116	1240K	240450	M	n/a (no relatives detected)	..	..	..	-0.008154	-1.88197	[0,0]	0.001	0.024	None	[0,0.048]	ds.half,ds.half	0.03800,0.03690	0.130,0.130	0.134,0.12	14.00,11.90	J1,J1	[0.887,0.933],[0.845,0.926]	PASS
I1947	I1947	Ganj_Dareh_N	9992	8211-7827 calBCE (8860±30 BP, Beta-432800)	Ganj Dareh	Iran	34.45	48.116	1240K	913988	M	Iran, Ganj Dareh Family A (3 members) (I1946-I1947-I1952 have a father-son1-son2 relationship)	..	..	..	0.003924	2.1921	[0,0.007]	-0.001	0.004	None	[0,0.007]	ds.half,ds.half,ds.half	..,0.21880,0.13420	0.933,1.580,0.970	0.132,0.125,0.141	135.00,127.00,80.60	R2+13500,R2+13500,R2+13500	[0.987,0.997],[0.992,1.000],[0.990,0.998]	PASS
I1949	I1949	Ganj_Dareh_N	10042	8242-7954 calBCE (8915±40 BP, PSUAMS-2261)	Ganj Dareh	Iran	34.45	48.116	1240K	139812	M	n/a (no relatives detected)	..	..	..	..	..	..	0.047	0.026	None	[0,0.098]	ds.half,ds.half,ds.half	0.02450,0.05470,0.04820	0.045,0.050,0.050	0.176,0.241,0.246	0.32,13.30,11.10	..,H2a,R2'JT	..,[0.909,0.947],[0.933,0.966]	PASS
I1951	I1951	Ganj_Dareh_N	9848	8198-7613 calBCE (8800±50 BP, Poz-81109)	Ganj Dareh	Iran	34.45	48.116	1240K	35814	F	n/a (no relatives detected)	..	..	n/a (female)	n/a (female)	n/a (female)	n/a (female)	-0.101	0.019	Model_Misspecified	[0,0]	ds.half,ds.half	0.02300,0.03600	0.008,0.030	0.267,0.327	3.99,12.90	HV,HV	[0.391,0.457],[0.968,0.988]	QUESTIONABLE_CRITICAL	removed as contaminated
I1954	I1954	Ganj_Dareh_N	10162	8295-7976 calBCE (9000±40 BP, Beta-436170)	Ganj Dareh	Iran	34.45	48.116	1240K	917421	M	n/a (no relatives detected)	..	..	..	0.001172	0.846043	[0,0.004]	-0.003	0.003	None	[0,0.003]	ds.half,ds.half,ds.half	0.05330,0.09940,0.07700	1.657,1.700,1.890	0.146,0.127,0.132	283.00,70.60,59.50	R2+13500,R2+13500,R2+13500	[0.959,0.975],[0.957,0.977],[0.952,0.976]	PASS
I7527	I7527	Ganj_Dareh_N	9900	8200-7700 BCE	Ganj Dareh	Iran	34.45	48.116	1240K	98500	F	n/a (no relatives detected)	0.084	0.013	n/a (female)	n/a (female)	n/a (female)	n/a (female)	0.001	0.035	Model_Misspecified	[0,0.07]	ds.half	0.0508	0.089027	0.084	13.5	U7a	[0.968,0.991]	REPLOT_PASS
I2323	I2323	Hajji_Firuz_C	7910	6064-5846 calBCE (7090±50 BP, Poz-81115)	Hajji Firuz	Iran	36.9944	45.4744	1240K	457887	F	Iran, Hajji Firuz Family A (3 members) (I2323-I4349 have a 2d or 3d relationship; I2323-I4351 have a 2d or 3d relationship; I4349-I4351 have a 2d or 3d relationship)	..	..	n/a (female)	n/a (female)	n/a (female)	n/a (female)	0.013	0.013	None	[0,0.038]	ds.half,ds.half,ds.half,ds.half	0.01700,0.02050,0.01910,0.01940	0.090,0.090,0.100,0.090	0.095,0.097,0.091,0.095	43.40,52.50,54.30,49.60	K1a19,K1a19,K1a19,K1a19	[0.985,0.995],[0.979,0.990],[0.976,0.988],[0.979,0.991]	PASS	removed as relatives
I2328	I2328	Hajji_Firuz_C	7900	6020-5889 calBCE (7075±30 BP, PSUAMS-2345)	Hajji Firuz	Iran	36.9944	45.4744	1240K	16306	M	n/a (no relatives detected)	..	..	..	..	..	..	0.162	0.027	Model_Misspecified	[0.109,0.215]	ds.half,ds.half,ds.half,ds.half	0.00520,0.00780,0.00780,0.00710	..,..,..,..	0.133,0.136,0.131,0.123	79.90,97.50,88.10,97.40	K1b1,K1b1,K1b1,K1b1	[0.998,1.000],[0.996,1.000],[0.997,1.000],[0.997,1.000]	PASS
I4241	I4241	Hajji_Firuz_C	7904	6021-5891 calBCE (7080±30 BP, PSUAMS-2163)	Hajji Firuz	Iran	36.9944	45.4744	1240K	846035	M	n/a (no relatives detected)	0.097	0.415	4420	0.006933	4.58094	[0.004,0.01]	0.005	0.004	None	[0,0.013]	ds.half	0.1934	2.46163	0.097	116	K1a3	[0.975,0.987]	PASS
I4349	I4349	Hajji_Firuz_C	7747	5891-5720 calBCE (6915±40 BP, PSUAMS-2126)	Hajji Firuz	Iran	36.9944	45.4744	1240K	852840	M	Iran, Hajji Firuz Family A (3 members) (I2323-I4349 have a 2d or 3d relationship; I2323-I4351 have a 2d or 3d relationship; I4349-I4351 have a 2d or 3d relationship)	..	..	..	0.013646	4.0096	[0.007,0.02]	-0.011	0.002	None	[0,0]	ds.minus,ds.minus	0.15840,0.15570	1.790,3.181	0.274,0.241	151.00,145.00	U1a1d,U1a1d	[0.987,0.998],[0.983,0.995]	PASS	removed as relatives
I4351	I4351	Hajji_Firuz_C	7920	6065-5889 calBCE (7100±45 BP, PSUAMS-2151)	Hajji Firuz	Iran	36.9944	45.4744	1240K	685526	F	Iran, Hajji Firuz Family A (3 members) (I2323-I4349 have a 2d or 3d relationship; I2323-I4351 have a 2d or 3d relationship; I4349-I4351 have a 2d or 3d relationship)	0.273	0.013	n/a (female)	n/a (female)	n/a (female)	n/a (female)	-0.009	0.002	None	[0,0]	ds.minus	0.1126	2.871	0.273	169	HV	[0.978,0.995]	PASS
I2337	I2337	Tepe_Hissar_C	5522	3640-3518 calBCE (4780±30 BP, PSUAMS-1919)	Tepe Hissar	Iran	36.1544	54.3836	1240K	513426	M	n/a (no relatives detected)	..	..	..	0.001778	0.38231	[0,0.011]	-0.001	0.01	None	[0,0.019]	ds.half,ds.half,ds.half	0.02710,0.02490,0.02250	0.140,0.150,0.150	0.123,0.123,0.121	66.50,72.10,75.80	I1,I1,I1	[0.986,0.995],[0.993,1.000],[0.990,0.998]	QUESTIONABLE_CRITICAL	removed as contaminated
I2512	I2512	Tepe_Hissar_C	4838	2917-2786 calBCE (4265±25 BP, PSUAMS-1914)	Tepe Hissar	Iran	36.1544	54.3836	1240K	234981	M	Iran, Tepe Hissar Family A (2 members) (I2512-I2925 have a 2d or 3d relationship)	..	..	..	0.019171	0.880351	[0,0.062]	0.015	0.016	None	[0,0.046]	ds.half,ds.half,ds.half	0.03460,0.05960,0.04910	0.085,0.100,0.110	0.266,0.259,0.251	21.60,18.60,15.20	HV,HV,HV	[0.967,0.985],[0.951,0.982],[0.963,0.993]	PASS	removed as a relative
I2513	I2513	Tepe_Hissar_C	4564	2847-2492 calBCE (4070±25 BP, PSUAMS-2229)	Tepe Hissar	Iran	36.1544	54.3836	1240K	634358	F	n/a (no relatives detected)	0.103	0.013	n/a (female)	n/a (female)	n/a (female)	n/a (female)	-0.011	0.008	None	[0,0.005]	ds.half	0.2296	1.826	0.103	359	W3b	[0.987,0.994]	QUESTIONABLE
I2514	I2514	Tepe_Hissar_C	4347	2471-2299 calBCE (3915±25 BP, PSUAMS-1918)	Tepe Hissar	Iran	36.1544	54.3836	1240K	729801	M	n/a (no relatives detected)	0.067	0.424	5121	0.004837	4.80967	[0.003,0.007]	-0.022	0.007	None	[0,0]	ds.half	0.7069	5.554	0.067	894	W3b	[0.909,0.950]	PASS
I2918	I2918	Tepe_Hissar_C	5566	3705-3530 calBCE (4850±30 BP, PSUAMS-2228)	Tepe Hissar	Iran	36.1544	54.3836	1240K	44665	F	n/a (no relatives detected)	..	..	n/a (female)	n/a (female)	n/a (female)	n/a (female)	0.156	0.036	None	[0.085,0.227]	ds.half,ds.half,ds.half	0.00480,0.00720,0.00900	..,0.020,..	0.083,0.077,0.015	11.10,12.00,1.07	U7a,U7,..	[0.966,0.979],[0.959,0.983],..	PASS
I2921	I2921	Tepe_Hissar_C	5533	3648-3528 calBCE (4820±30 BP, PSUAMS-1912)	Tepe Hissar	Iran	36.1544	54.3836	1240K	257584	F	n/a (no relatives detected)	..	0.006	n/a (female)	n/a (female)	n/a (female)	n/a (female)	-0.016	0.027	None	[0,0.037]	ds.half,ds.half,ds.half	0.00690,0.00990,..	0.094,0.090,0.092	..	31.60,24.90,..	J1d,J1d,0	[0.998,1.000],[0.981,0.996],..	PASS
I2922	I2922	Tepe_Hissar_C	4043	2198-1985 calBCE (3705±25 BP, PSUAMS-2227)	Tepe Hissar	Iran	36.1544	54.3836	1240K	279149	F	n/a (no relatives detected)	..	..	n/a (female)	n/a (female)	n/a (female)	n/a (female)	0.012	0.031	None	[0,0.073]	ds.half,ds.half,ds.half	0.00290,0.00580,0.00490	0.114,0.120,0.080	0.074,0.089,0.078	67.70,22.60,17.90	W3b,W3b,W3b	[0.994,0.999],[0.988,1.000],[0.976,0.998]	PASS
I2923	I2923	Tepe_Hissar_C	4707	2879-2632 calBCE (4160±25 BP, PSUAMS-1915)	Tepe Hissar	Iran	36.1544	54.3836	1240K	565718	M	n/a (no relatives detected)	0.121	0.437	1744	0.002602	1.49071	[0,0.006]	-0.011	0.006	None	[0,0.001]	ds.half	0.0432	1.35	0.121	123	W3b	[0.993,0.999]	PASS
I2924	I2924	Tepe_Hissar_C	4715	2882-2636 calBCE (4170±25 BP, PSUAMS-2262)	Tepe Hissar	Iran	36.1544	54.3836	1240K	600665	F	n/a (no relatives detected)	0.048	0.013	n/a (female)	n/a (female)	n/a (female)	n/a (female)	-0.002	0.018	None	[0,0.033]	ds.half	0.3381	1.386	0.048	454	U5b2	[0.991,0.998]	PASS
I2925	I2925	Tepe_Hissar_C	4715	2882-2636 calBCE (4170±25 BP, PSUAMS-1913)	Tepe Hissar	Iran	36.1544	54.3836	1240K	664254	F	Iran, Tepe Hissar Family A (2 members) (I2512-I2925 have a 2d or 3d relationship)	0.104	0.013	n/a (female)	n/a (female)	n/a (female)	n/a (female)	-0.005	0.007	None	[0,0.009]	ds.half	0.3168	1.884	0.104	448	X2p	[0.992,0.999]	PASS
I2927	I2927	Tepe_Hissar_C	4447	2575-2350 calBCE (3970±30 BP, PSUAMS-1916)	Tepe Hissar	Iran	36.1544	54.3836	1240K	395891	M	n/a (no relatives detected)	..	..	..	-0.00305	-2.3122	[0,0]	-0.007	0.014	None	[0,0.02]	ds.half,ds.half,ds.half	0.00590,0.01030,0.00840	0.178,0.200,0.200	0.194,0.221,0.223	32.80,11.60,10.50	T2h2,..,T2h2	[0.989,0.999],[0.975,1.000],[0.974,1.000]	PASS
I2928	I2928	Tepe_Hissar_C	4625	2857-2501 calBCE (4095±25 BP, PSUAMS-1917)	Tepe Hissar	Iran	36.1544	54.3836	1240K	200711	F	n/a (no relatives detected)	..	..	n/a (female)	n/a (female)	n/a (female)	n/a (female)	-0.025	0.019	None	[0,0.012]	ds.half,ds.half,ds.half	0.09360,0.18780,0.18850	0.069,0.070,0.080	0.078,0.089,0.087	73.40,63.10,71.10	U7a,U7a,U7a	[0.994,1.000],[0.996,1.000],[0.997,1.000]	PASS
I2123	I2123	Indus_Periphery_2	4211	2451-2141 calBCE (3815±35 BP, Poz-83491)	Gonur	Turkmenistan	38.2123	62.0344	1240K	314637	F	n/a (no relatives detected)	..	..	n/a (female)	n/a (female)	n/a (female)	n/a (female)	0.044	0.023	None	[0,0.089]	ds.half,ds.half,ds.half	0.00470,0.00550,0.00290	..,0.090,0.080	0.069,0.066,0.073	250.00,190.00,209.00	M30a,M30,M30a	[0.998,1.000],[0.997,1.000],[0.996,1.000]	PASS	expanded Indus Periphery group
I11041	I11041	Indus_Periphery_2	4015	2141-1961 calBCE (3675±25 BP, PSUAMS-4603)	Gonur	Turkmenistan	38.2123	62.0344	1240K	170673	M	n/a (no relatives detected)	0.116	0.406478	..	..	..	..	0.061	0.033	None	[0,0.126]	ds.half	..	0.091111	0.116	22.92	R2	[0.966,0.991]	PASS	expanded Indus Periphery group
I8726	I8726	Indus_Periphery_2	5000	3100-3000 BCE	Seistan, Shahr-i Sokhta	Iran	30.6499	61.4003	1240K	602536	M	n/a (no relatives detected)	0.131	0.427	1313	0.007779	2.69042	[0.002,0.013]	-0.004	0.01	None	[0,0.016]	ds.half	0.4401	1.07642	0.131	59.9	U2c1	[0.989,0.999]	PASS	the only representative of the Indus Periphery group in the admixture graph by Shinde et al., replaced b the shotgun version in our study
I8726.SG	I8726	Indus_Periphery_2	5000	3100-3000 BCE	Seistan, Shahr-i Sokhta	Iran	30.6499	61.4003	Shotgun	1056159	M	n/a (no relatives detected)	..	..	..	..	..	..	-0.009	0.006	None	[0,0.003]	ds.half	0.4401	..	..	..	..	..	PASS	expanded Indus Periphery group
I11458_published	I11458	Indus_Periphery_2	4600	3200-2100 BCE	Seistan, Shahr-i Sokhta	Iran	30.6499	61.4003	1240K	29686	M	n/a (no relatives detected)	0.191	0.405	8	n/a (<200 SNPs)	n/a (<200 SNPs)	n/a (<200 SNPs)	-0.107	0.006	Model_Misspecified	[0,0]	ds.half	0.00224778	0.025536	0.191	8.86004	M3a2	[0.87,0.961]	PASS	expanded Indus Periphery group
