# Supplementary material for: On the limits of fitting complex models of population history to f-statistics
Source: eLife. 2023 Jun 29;12:e85492. doi: 10.7554/eLife.85492 (PMC10310323; doi:10.7554/eLife.85492)
Supplement: Supplementary file 5. — This is a re-analysis of the data from Narasimhan et al., 2019, with a modified group composition that is described in Appendix 2. [file elife-85492-supp5.xlsx]

## Sheet: Supplementary file 5
		Ancestry fraction estimates for sources								Standard errors of the ancestry fraction estimates
Analysis label	qpAdm p-value	AHG	Anatolia_N	EEHG	ESHG	Ganj_Dareh_N	PPN	WEHG	WSHG	AHG	Anatolia_N	EEHG	ESHG	Ganj_Dareh_N	PPN	WEHG	WSHG	comment
Indus_Periphery (10 ind.)	1.26082e-95					1
Indus_Periphery (10 ind.)	2.17949e-30		-0.326167			1.32617					0.0303493			0.0303493
Indus_Periphery (10 ind.)	2.03988e-15	0.251047				0.748953				0.0139578				0.0139578
Indus_Periphery (10 ind.)	1.65304e-88					0.918233			0.081767					0.0160229			0.0160229
Indus_Periphery (10 ind.)	0.00445133	0.239633				0.67641			0.0839568	0.0129745				0.0149516			0.0117962
Indus_Periphery (10 ind.)	4.12538e-14	0.187853	-0.0977491			0.909896				0.0247492	0.0323801			0.0531995
Indus_Periphery (10 ind.)	3.48537e-30		-0.346235			1.3564			-0.0101674		0.0334969			0.0456819			0.0220515
Indus_Periphery (10 ind.)	0.0302736	0.287255	0.0767206			0.531502			0.104523	0.0207761	0.0294727			0.0528054			0.0130178
Afanasievo	0.03		0.18	0.53		0.29					0.02	0.01		0.02
Aigyrzhal_BA	0.07		0.08			0.48			0.44		0.03			0.03			0.02
Aligrama2_IA	0.17	0.32	0.13			0.4			0.16	0.02	0.03			0.05			0.02
Aligrama2_IA	0.06	0.28				0.45	0.13		0.15	0.02				0.05	0.03		0.01
Aligrama2_IA	0.03		0.11		0.34	0.46			0.09		0.03		0.03	0.06			0.02
Aligrama2_IA	0.02				0.32	0.49	0.11		0.09				0.02	0.05	0.03		0.01
Barikot_H	0.34	0.22	0.18			0.37		0.04	0.19	0.02	0.03			0.05		0.01	0.02
Barikot_H	0.06	0.21	0.21			0.36			0.22	0.02	0.03			0.05			0.02
BMAC	0.04	0.02	0.26			0.59			0.12	0.01	0.02			0.03			0.01
BMAC_o2	0.23	0.1	0.44	0.18		0.28				0.02	0.06	0.06		0.03
BMAC_o2	0.5		0.44	0.16	0.07	0.34					NA	NA	0.02	0.02				SE not available
BMAC2	0.83		0.15			0.66	0.14		0.06		0.06			0.03	0.06		0.02
BMAC2	0.56		0.27			0.69			0.04		0.02			0.03			0.02
BMAC2	0.3		0.26			0.75					0.02			0.02
Botai.SG	0.001				0.1				0.9				0.01				0.01
Bustan_BA_o2	0.55	0.27	0.15			0.38			0.21	0.03	0.04			0.08			0.02
Bustan_BA_o2	0.05	0.22				0.47	0.14		0.18	0.03				0.08	0.05		0.02
Bustan_BA_o2	0.07		0.11		0.27	0.48			0.14		0.04		0.04	0.08			0.02
Bustan_EN	0.07		0.09	0.07		0.85					0.03	0.02		0.03
Bustan_EN	0.01			0.06		0.81	0.13					0.02		0.04	0.03
Bustan_EN	0.44		0.13			0.76			0.11		0.03			0.04			0.02
Bustan_EN	0.05					0.73	0.17		0.1					0.05	0.03		0.02
Butkara_H	0.01	0.28	0.24			0.3			0.19	0.02	0.03			0.05			0.02
Central_Steppe_EMBA	0.44			0.09		0.15	0.09		0.67			0.03		0.03	0.02		0.03
Central_Steppe_EMBA	0.35					0.14	0.09	0.03	0.73					0.03	0.02	0.01	0.02
Central_Steppe_EMBA	0.47		0.05			0.15		0.04	0.76		0.03			0.03		0.02	0.02
Central_Steppe_EMBA	0.09		0.1			0.11			0.79		0.02			0.03			0.02
Central_Steppe_EMBA	0.03					0.12	0.11		0.76					0.03	0.02		0.01
Central_Steppe_MLBA	0.1		0.32	0.42		0.17		0.1			0.02	0.01		0.02		0.01
Dali_EBA	0.05					0.23			0.77					0.03			0.02
Darra-i-kur_MBA	0.31			0.12		0.88						0.04		0.04
Darra-i-kur_MBA	0.26					0.89			0.12					0.05			0.05
Darra-i-kur_MBA	0.08					1								NA
Geoksyur_EN	0.01		0.21			0.63			0.17		0.02			0.02			0.01
Gonur1_BA_o	0.5			0.13		0.58			0.29			0.04		0.02			0.05
Gonur1_BA_o	0.97		0.14			0.39			0.47		0.04			0.05			0.03
Gonur1_BA_o	0.87					0.37	0.16		0.47					0.05	0.04		0.02
Gonur1_BA_o	0.39					0.54		0.06	0.4					0.03		0.02	0.02
Gonur1_BA_o	0.12					0.57			0.43					0.02			0.02
Hajji_Firuz_BA	0.12		0.44	0.3		0.26					0.03	0.02		0.04
Hajji_Firuz_C	0.02		0.53			0.47					0.02			0.02
Hajji_Firuz_IA	0.25		0.25	0.15	0.1	0.29	0.23				0.11	0.03	0.03	0.08	0.1
Hajji_Firuz_IA	0.01		0.41	0.08		0.51					0.04	0.02		0.04
Hajji_Firuz_IA	0.05		0.48			0.41			0.12		0.04			0.05			0.02
Khvalynsk_EN	0.2			0.1		0.11	0.08					0.02		0.03	0.03			SUM <100%
Khvalynsk_EN	0.03			0.81		0.19						0.02		0.02
Ksirov_H_Kushan	0.29	0.14	0.39	0.13		0.2			0.15	0.03	0.04	0.04		0.06			0.05
Ksirov_H_Kushan	0.2	0.14	0.39			0.21		0.05	0.21	0.02	0.04			0.07		0.02	0.02
Ksirov_H_Kushan	0.042		0.37	0.13	0.12	0.27			0.12		0.04	0.05	0.03	0.06			0.06
Mereke_EBA_Yamnaya	0.4		0.07	0.57		0.36					0.03	0.02		0.04
Mereke_EBA_Yamnaya	0.05			0.55		0.33	0.12					0.02		0.04	0.03
Mereke_EBA_Yamnaya	0.02			0.54		0.41		0.05				0.03		0.03		0.03
Namazga_CA.SG	0.06			0.08		0.83	0.09					0.02		0.04	0.03
Namazga_CA.SG	0.01			0.06		0.94						0.02		0.02
Namazga_CA.SG	0.57		0.1			0.76			0.14		0.03			0.04			0.02
Namazga_CA.SG	0.35					0.71	0.15		0.14					0.05	0.03		0.02
Namazga_CA.SG	0.01					0.88		0.04	0.08					0.02		0.02	0.02
Okunevo_BA.SG	0.08				0.33	0.15			0.52				0.01	0.01			0.01
Parkhai_Anau_EN	0.01		0.17			0.73			0.11		0.02			0.02			0.01
Poltavka_o	0.27		0.26	0.27		0.26		0.21			0.04	0.04		0.05		0.03
Poltavka_o	0.25		0.32			0.17		0.26	0.25		0.04			0.05		0.02	0.03
Saidu_Sharif_H_o	0.03	0.47	0.12			0.26		0.05	0.1	0.02	0.03			0.05		0.01	0.02
Saidu_Sharif_H_o	0.13	0.45	0.12			0.3			0.12	0.02	0.03			0.05			0.02
Sarazm_EN	0.04		0.08			0.68			0.25		0.03			0.04			0.02
Seh_Gabi_C	0.14		0.37			0.63					0.02			0.02
Seh_Gabi_LN	0.62		0.13			0.87					0.03			0.03
Seh_Gabi_LN	0.47					0.85	0.15							0.03	0.03
Shahr_I_Sokhta_BA1	0.04	0.04	0.19			0.66			0.12	0.02	0.02			0.05			0.01
Shahr_I_Sokhta_BA1	0.03		0.19		0.06	0.65			0.11		0.02		0.02	0.04			0.01
Sintashta_MLBA_o3	0.45		0.07	0.35					0.59		0.02	0.04					0.04
Sintashta_MLBA_o3	0.67			0.41		0.09			0.5			0.04		0.02			0.04
Sintashta_MLBA_o3	0.39			0.3			0.07		0.61			0.04			0.01		0.04
Sintashta_MLBA_o3	0.45						0.07	0.11	0.82						0.02	0.02	0.02
Sintashta_MLBA_o3	0.18		0.04					0.12	0.84		0.02					0.02	0.02
Sintashta_MLBA_o3	0.02							0.16	0.84							0.02	0.02
SPGT	0.05	0.21	0.21			0.36		0.02	0.2	0.01	0.02			0.03		0.01	0.01
SPGT	0.03	0.21	0.23			0.36			0.21	0.01	0.02			0.03			9	incorrect SE
SPGT_o	0.07	0.13	0.29	0.13		0.29			0.17	0.04	0.05	0.06		0.08			0.06
SPGT_o	0.32	0.13	0.28			0.29		0.08	0.23	0.03	0.05			0.08		0.02	0.06
Steppe_LBA	0.02		0.28	0.33	0.17	0.06			0.16		0.03	0.03	0.02	0.04			0.04
Steppe_MLBA_oBMAC	0.94		0.27	0.43		0.23		0.07			0.02	0.02		0.02		0.01
Steppe_MLBA_oESHG	0.03		0.2	0.24	0.27				0.24		0.02	0.05	0.02				0.05	SUM <100%
Steppe_MLBA_oESHG	0.05		0.21		0.26			0.1	0.44		0.02		0.02			0.02	0.02
Steppe_MLBA_oWSHG	0.07		0.2			0.16		0.12	0.53		0.02			0.02		0.01	0.01
Swat_H	0.47	0.27	0.2	0.06		0.3			0.17	0.01	0.02	0.02		0.03			0.03
Swat_H	0.33	0.27	0.2			0.3		0.02	0.21	0.01	0.02			0.03		0.01	0.01
Swat_Medieval	0.05	0.18	0.25			0.33		0.02	0.22	0.02	0.03			0.05		0.01	0.02
Tepe_Hissar_C	0.002		0.31			0.64			0.05		0.02			0.02			0.01
Western_Steppe_EMBA	0.01		0.15	0.51		0.3		0.04			0.02	0.02		0.03		0.01
Western_Steppe_MLBA	0.03		0.34	0.35		0.18		0.13			0.01	0.01		0.02		0.01
		1	1	1	1	1	1	1	1	1	1	1	1	1	1	1	1
