# Supplementary material for: On the limits of fitting complex models of population history to f-statistics
Source: eLife. 2023 Jun 29;12:e85492. doi: 10.7554/eLife.85492 (PMC10310323; doi:10.7554/eLife.85492)
Supplement: Supplementary file 6. — qpAdm p-values are shown for each individual for models of varying complexity, from one- to four-way models. [file elife-85492-supp6.xlsx]

## Sheet: Supplementary file 6
Version ID (Narasimhan et al. 2019)	Master ID	Analysis Label	p-value X=GD	p-value X=GD+AN	p-value X=GD+AHG	p-value X=GD+WSHG	p-value X=GD+AHG+WSHG	p-value X=GD+AHG+AN	p-value X=GD+AN+WSHG	p-value X=GD+AHG+AN+WSHG	SNPs hit on autosomal targets		Abbreviation	Group ID (see Table S4 for group composition)
I10410	I10410	BMAC_1	0.000682389	0.0253786	0.25682	0.000614832	0.287842	0.128512	0.911994	0.772653	249248		GD	Ganj Dareh Neolithic
I1784	I1784	BMAC_10	2.6944e-12	2.14944e-09	7.29438e-09	2.08454e-10	3.84453e-06	1.74648e-09	0.274647	0.216138	662584		AHG	Andamanese hunter-gatherers
I1787	I1787	BMAC_11	0.343971	0.881026	0.941993	0.150662	0.684646	0.9267	0.629995	0.589947	29359		AN	Anatolian Neolithic
I1788	I1788	BMAC_12	1.35325e-12	0.0093116	7.83257e-07	1.7801e-12	2.66306e-05	0.00298448	0.305245	0.226702	281189		WSHG	West Siberian hunter-gatherers
I1790	I1790	BMAC_13	0.000132253	0.000779885	0.00563882	0.000313897	0.0820775	0.00206088	0.303511	0.539483	198651
I1793	I1793	BMAC_14	1.07251e-06	2.59756e-05	1.49117e-05	4.47561e-06	0.00753236	8.17487e-06	0.17356	0.152401	113140
I2085	I2085	BMAC_15	3.96152e-08	0.000533983	0.0334986	1.31463e-07	0.0187993	0.0205044	0.200016	0.11131	141334
I2087	I2087	BMAC_16	0.00292979	0.277324	0.438693	0.00287427	0.307227	0.391094	0.406655	0.304269	73668
I2116	I2116	BMAC_17	8.04399e-11	6.55257e-06	4.56351e-06	3.7023e-11	1.51575e-05	6.75001e-06	0.0452475	0.174882	317154
I2121	I2121	BMAC_18	1.18112e-06	0.0136739	0.0178247	1.85702e-06	0.00535565	0.0821919	0.0387534	0.616555	230253
I2125	I2125	BMAC_19	0.0569943	0.288528	0.287069	0.0534618	0.16779	0.23808	0.386734	0.263675	83003
I10411	I10411	BMAC_2	0.00338121	0.0164019	0.130528	0.00243447	0.40617	0.0672372	0.226491	0.251145	233376
I2128	I2128	BMAC_20	0.0191344	0.708237	0.826101	0.028624	0.766116	0.873464	0.571852	0.821671	35446
I3374	I3374	BMAC_21	0.00972602	0.0841918	0.0384743	0.0136581	0.210076	0.0689668	0.521795	0.349677	144321
I4156	I4156	BMAC_22	0.0618829	0.59322	0.510171	0.011851	0.431147	0.520938	0.829958	0.659374	24080
I4157	I4157	BMAC_23	1.59234e-07	3.33481e-05	0.000551245	1.81388e-06	0.0349561	0.000590959	0.637967	0.422874	281113
I4159	I4159	BMAC_24	1.42871e-13	0.000147298	3.07985e-05	1.32607e-13	6.26031e-06	0.000202258	0.115656	0.0586535	242409
I4161	I4161	BMAC_25	9.49478e-12	1.10326e-09	5.69345e-07	1.20829e-09	0.000387492	9.61059e-08	0.04899	0.394299	712798
I4163	I4163	BMAC_26	2.24798e-06	0.00651852	2.59394e-05	3.20343e-06	0.000112704	0.00207622	0.579664	0.55415	571489
I4285	I4285	BMAC_27	1.40917e-10	0.00629062	0.00024582	9.44065e-11	5.66728e-05	0.00463024	0.19558	0.0966418	316114
I4286	I4286	BMAC_28	4.08502e-10	0.0110799	9.6132e-05	8.45234e-11	3.11906e-05	0.00427627	0.575933	0.40583	730935
I4288	I4288	BMAC_29	1.67975e-12	0.14309	0.000287932	6.60996e-13	0.00019234	0.157655	0.706642	0.43235	437892
I11025	I11025	BMAC_3	0.0234065	0.208011	0.217765	0.0320615	0.173937	0.179847	0.501013	0.633281	26490
I4289	I4289	BMAC_30	1.70627e-11	0.00398813	0.000276168	2.97065e-11	6.17737e-05	0.00690061	0.48072	0.224548	661883
I4312	I4312	BMAC_31	2.31802e-25	3.97166e-11	5.7702e-09	1.84905e-24	2.65757e-08	1.6765e-08	0.419801	0.34509	662617
I4313	I4313	BMAC_32	1.33288e-13	4.65282e-10	3.39855e-07	3.3378e-11	0.000122489	9.0089e-08	0.357003	0.349427	747332
I4315	I4315	BMAC_33	1.05669e-15	1.43176e-12	1.90081e-09	5.38008e-11	0.000251738	1.36624e-09	0.146391	0.0477405	732399
I4899	I4899	BMAC_34	0.00125191	0.00460472	0.183786	0.00203845	0.432221	0.223523	0.152718	0.374892	77841
I5604	I5604	BMAC_35	3.06229e-09	1.17619e-06	6.32732e-09	1.62957e-09	6.15033e-09	2.83739e-07	0.00158551	0.117115	777954
I5605	I5605	BMAC_36	6.94972e-07	0.000570682	0.002074	2.61214e-06	0.00379187	0.00230245	0.28888	0.14619	254447
I6119	I6119	BMAC_37	5.54828e-05	0.00287442	0.0225027	3.54736e-05	0.00613409	0.0120748	0.00870443	0.00603807	51113
I6668	I6668	BMAC_38	9.01712e-19	1.08281e-05	2.61053e-06	1.95583e-19	3.17217e-06	3.11858e-05	0.386516	0.268014	821527
I6675	I6675	BMAC_39	5.29024e-14	0.0178181	0.0254817	5.63639e-14	0.0171119	0.465897	0.0823203	0.565569	658949
I11026	I11026	BMAC_4	9.60287e-21	0.0018522	2.49704e-06	8.44556e-21	2.38625e-06	0.00245052	0.637403	0.382319	290796
I7411	I7411	BMAC_40	8.31607e-11	6.40038e-09	3.95673e-08	6.03502e-09	5.3953e-05	7.29252e-09	0.204122	0.120299	719490
I7412	I7412	BMAC_41	9.06824e-07	0.00654794	5.81348e-05	2.68616e-07	5.27492e-05	0.00708616	0.0147541	0.083981	654512
I7414	I7414	BMAC_42	0.000478764	0.020683	0.000680405	0.000434972	0.00150032	0.0131361	0.121165	0.108962	917143
I7416	I7416	BMAC_43	2.6836e-07	0.16605	2.28995e-05	5.79006e-08	6.67169e-06	0.0901207	0.353868	0.547781	892482
I7419	I7419	BMAC_44	2.22113e-12	1.71014e-08	7.78147e-08	9.21083e-13	2.06838e-06	4.30634e-08	0.000555599	0.00284874	873180
I7420	I7420	BMAC_45	1.52193e-09	0.00047901	1.24671e-05	5.4206e-10	2.75616e-05	0.000179826	0.396217	0.614874	899293
I7421	I7421	BMAC_46	2.16421e-09	0.000827541	0.00203614	4.18896e-10	0.00433896	0.00498575	0.106117	0.426063	865688
I7492	I7492	BMAC_47	2.19029e-09	5.21421e-05	6.1286e-07	4.89765e-10	2.3271e-07	1.1267e-05	0.00607309	0.00318225	913041
I7542	I7542	BMAC_48	1.39527e-13	0.00193882	0.00112905	4.89421e-14	0.000333319	0.0140242	0.363658	0.170964	476130
I11027	I11027	BMAC_5	2.01792e-10	3.39324e-07	3.03596e-06	6.11326e-10	0.000108708	8.74601e-07	0.246943	0.158914	757100
I11042	I11042	BMAC_6	0.234915	0.191714	0.238645	0.198354	0.194085	0.131771	0.349061	0.210619	19125
I11519	I11519	BMAC_7	1.42804e-08	0.000135588	0.000140369	1.05754e-08	0.000221104	0.000266162	0.0360197	0.537302	86645
I1781	I1781	BMAC_8	2.46891e-05	0.0150637	0.0286936	1.81593e-05	0.0113028	0.0378783	0.186112	0.104642	312044
I1782	I1782	BMAC_9	3.14657e-08	3.14186e-07	6.81098e-06	3.29702e-07	0.00250574	1.62126e-06	0.0174678	0.557334	239217
I12478	I12478	Geoksyur_EN_1	0.0225114	0.047378	0.0240136	0.079006	0.141538	0.0965708	0.417279	0.269223	77744
I12487	I12487	Geoksyur_EN_10	1.47664e-06	3.69976e-06	0.000120779	0.000202989	0.0481302	5.88374e-05	0.483539	0.628142	436355
I8503	I8503	Geoksyur_EN_11	1.59374e-06	0.000761722	0.0309685	1.0308e-06	0.0803887	0.0167992	0.594386	0.423351	148535
I8504	I8504	Geoksyur_EN_12	1.15925e-10	1.30135e-08	2.22795e-07	1.01248e-08	0.000190798	3.20255e-08	0.249652	0.124215	364312
I8505	I8505	Geoksyur_EN_13	5.33481e-07	0.000194554	0.000437776	1.96258e-06	0.00542506	0.000500269	0.695074	0.78248	115625
I8510	I8510	Geoksyur_EN_14	4.46614e-13	3.93553e-10	1.11644e-06	1.845e-10	0.012486	3.32365e-06	0.421482	0.420068	343931
I8524	I8524	Geoksyur_EN_15	1.00406e-06	1.53884e-06	0.000488366	4.18438e-05	0.0140425	0.000266559	0.167018	0.0665466	218844
I8526	I8526	Geoksyur_EN_16	0.0209251	0.0232369	0.0861631	0.0173694	0.309497	0.0729065	0.115415	0.199916	43754
I8527	I8527	Geoksyur_EN_17	0.0110756	0.0176879	0.0862692	0.0102004	0.0663094	0.0450835	0.0765276	0.0187829	33138
I8528	I8528	Geoksyur_EN_18	0.0429964	0.0281883	0.232111	0.0473592	0.215131	0.360045	0.0482284	0.425391	29440
I8529	I8529	Geoksyur_EN_19	0.000292333	0.000386309	0.000960701	0.0307226	0.155126	0.0143512	0.199031	0.105594	109739
I12479	I12479	Geoksyur_EN_2	0.00102376	0.00188931	0.0406719	0.00442127	0.262955	0.0257112	0.49065	0.354369	80692
I8530	I8530	Geoksyur_EN_20	1.3777e-09	0.00217705	0.0196412	3.20501e-09	0.0175304	0.0249124	0.969352	0.834219	145415
I8532	I8532	Geoksyur_EN_21	9.72657e-07	2.99221e-05	0.000161197	0.000114177	0.0283443	0.00599146	0.929661	0.773304	112575
I12480	I12480	Geoksyur_EN_3	4.84979e-06	4.16289e-06	0.00178437	0.000246937	0.158668	0.00900116	0.0239749	0.123021	477405
I12481	I12481	Geoksyur_EN_4	7.06748e-20	3.53944e-16	6.53182e-08	8.93859e-14	0.00550358	2.27467e-07	0.107543	0.561713	489463
I12482	I12482	Geoksyur_EN_5	1.43526e-06	2.51674e-05	8.69038e-05	8.19121e-05	0.00398481	0.00016637	0.585029	0.445909	235342
I12483	I12483	Geoksyur_EN_6	1.54045e-06	5.227e-05	0.0111848	8.58499e-05	0.122559	0.00309193	0.439506	0.307675	346633
I12484	I12484	Geoksyur_EN_7	0.015763	0.0142253	0.285501	0.101788	0.686814	0.247018	0.455197	0.452365	124924
I12485	I12485	Geoksyur_EN_8	3.04126e-19	1.63775e-17	3.3636e-11	8.77667e-12	0.00221551	2.69991e-11	0.616265	0.415976	758188
I12486	I12486	Geoksyur_EN_9	5.08958e-11	2.3402e-07	9.59278e-07	2.93173e-10	1.81341e-05	7.01916e-07	0.0401167	0.0194693	772457
I10409	I10409	Indus_Periphery_1	2.25515e-67	4.57985e-15	0.0290985	9.73458e-62	0.672416	0.0453982	6.51079e-12	0.495038	107688
I8728	I8728	Indus_Periphery_10	1.02357e-78	6.18669e-30	0.000528529	1.57875e-72	0.208483	0.000692488	9.27106e-27	0.539805	657401
I11041	I11041	Indus_Periphery_2	2.99693e-05	0.056238	0.212834	4.72005e-05	0.312194	0.248966	0.0205603	0.203704	128105
I11456	I11456	Indus_Periphery_3	3.55092e-47	5.33882e-19	1.81067e-05	4.55333e-39	0.136231	1.88159e-05	3.3202e-18	0.131899	633905
I11458	I11458	Indus_Periphery_4	0.388959	0.321955	0.478577	0.265796	0.394331	0.314958	0.23226	0.222637	30098
I11459	I11459	Indus_Periphery_5	2.36287e-31	3.93328e-08	0.00464929	5.35569e-27	0.23828	0.0313582	2.33271e-07	0.133608	325684
I11466	I11466	Indus_Periphery_6	1.83214e-17	5.69783e-07	0.0140829	1.27579e-15	0.195063	0.0100161	1.62376e-07	0.482807	140447
I11480	I11480	Indus_Periphery_7	0.2087	0.141461	0.5122	0.43827	0.594312	0.448664	0.331572	0.597553	20314
I2123	I2123	Indus_Periphery_8	1.72233e-23	9.80042e-09	3.56092e-10	1.33252e-12	0.0360698	4.8141e-07	1.36708e-07	0.0218702	314905
I8726	I8726	Indus_Periphery_9	1.16046e-11	0.00230441	9.95196e-05	3.62425e-06	0.522238	0.00412469	0.00352277	0.440762	615135
I4085	I4085	Parkhai_Anau_EN_1	1.43249e-06	0.00436413	0.349612	7.8941e-07	0.302107	0.466782	0.0492098	0.805891	659729
I4086	I4086	Parkhai_Anau_EN_2	2.17352e-08	6.14264e-06	0.00706527	6.5663e-08	0.120423	0.00166945	0.258773	0.492319	721350
I4087	I4087	Parkhai_Anau_EN_3	6.48615e-11	2.38441e-09	6.86209e-08	2.12459e-08	9.58912e-05	1.25927e-08	0.116039	0.138121	803294
I4259	I4259	Parkhai_Anau_EN_4	8.02703e-09	0.00143063	0.00831574	3.67502e-09	0.0136417	0.0135112	0.363162	0.329281	677966
I4634	I4634	Parkhai_Anau_EN_5	0.000375888	0.000468228	0.0281117	0.00981942	0.430938	0.00993705	0.435379	0.858045	781276
I4635	I4635	Parkhai_Anau_EN_6	1.91295e-07	0.00367908	0.0219579	4.44856e-08	0.0177676	0.0191548	0.285394	0.150115	782514
I6669	I6669	Parkhai_Anau_EN_7	4.64358e-09	1.09929e-07	0.000356382	3.64067e-07	0.0136437	0.000142315	0.0197668	0.139742	769168
I6671	I6671	Parkhai_Anau_EN_8	2.0144e-07	5.80913e-06	1.88241e-05	5.05022e-06	0.0170802	2.00535e-05	0.0491652	0.328873	863817
I6674	I6674	Parkhai_Anau_EN_9	2.26833e-12	4.2548e-06	1.83499e-05	5.55387e-13	2.21115e-05	2.11087e-05	0.0204762	0.0058509	793068
I4290	I4290	Sarazm_EN_1	4.77756e-22	1.32026e-22	8.91482e-20	0.000805789	0.299313	5.07833e-12	0.223576	0.337801	445719
I4910	I4910	Sarazm_EN_2	4.38926e-24	1.24836e-23	3.70082e-24	4.35371e-06	2.1999e-05	6.1066e-18	0.00604922	0.00268613	783119
I11462	I11462	Shahr_I_Sokhta_BA1_1	0.351324	0.326964	0.34177	0.33807	0.342341	0.316226	0.445281	0.641077	656926
I11474	I11474	Shahr_I_Sokhta_BA1_2	0.0420165	0.0625747	0.195763	0.0504792	0.50268	0.130375	0.422888	0.835311	516701
I11476	I11476	Shahr_I_Sokhta_BA1_3	9.02498e-16	3.49449e-08	0.000147924	1.195e-15	0.000927976	8.15242e-05	0.139044	0.171023	658230
I11478	I11478	Shahr_I_Sokhta_BA1_4	1.46884e-08	3.69179e-07	1.33257e-08	0.0280694	0.0437041	2.1333e-07	0.0117828	0.0258175	667006
I11479	I11479	Shahr_I_Sokhta_BA1_5	0.00862762	0.0129329	0.0121193	0.0209397	0.0428147	0.00529491	0.350012	0.670862	94223
I11483	I11483	Shahr_I_Sokhta_BA1_6	0.84305	0.90219	0.932686	0.682413	0.888214	0.831475	0.948281	0.817204	65767
I8724	I8724	Shahr_I_Sokhta_BA1_7	8.28882e-06	2.38469e-05	6.56429e-05	4.46961e-05	9.53468e-05	1.68823e-05	0.00267485	0.0284118	173123
I8725	I8725	Shahr_I_Sokhta_BA1_8	3.32187e-05	0.00293973	0.00173614	0.000307961	0.00678612	0.00284866	0.852438	0.659185	646340
I10000	I10000	SPGT_1	8.35943e-25	6.95872e-19	2.22685e-18	2.74893e-11	8.61611e-06	5.61558e-18	8.70927e-12	0.239272	766731
I12144	I12144	SPGT_10	3.08641e-05	0.0542472	0.080775	0.00258579	0.715995	0.105938	0.037267	0.668716	91557
I12146	I12146	SPGT_11	3.64214e-15	5.97507e-12	5.00825e-14	0.00170607	0.0289029	4.88909e-13	0.000558085	0.625426	609366
I12147	I12147	SPGT_12	3.85353e-18	8.07396e-13	6.53276e-15	6.26649e-06	0.000451474	4.93218e-13	4.41611e-06	0.385928	430947
I12149	I12149	SPGT_13	2.43615e-24	1.14842e-17	1.53351e-17	5.81045e-11	2.80067e-06	1.51687e-17	1.8049e-11	0.263499	620955
I12444	I12444	SPGT_14	1.77591e-05	0.000711419	4.05259e-05	0.00235041	0.00445037	0.000240543	0.00240338	0.0520853	82148
I12445	I12445	SPGT_15	9.33381e-18	1.54365e-13	7.14051e-14	1.01155e-10	1.49757e-08	3.2828e-12	5.84992e-10	0.179985	665526
I12446	I12446	SPGT_16	4.67309e-26	4.70527e-12	1.13175e-09	5.49312e-18	0.000624942	1.19952e-07	1.84344e-12	0.358223	420926
I12447	I12447	SPGT_17	3.66529e-25	2.08073e-16	7.33454e-23	6.26129e-13	7.45122e-12	3.13817e-17	1.79396e-10	0.00350009	460430
I12448	I12448	SPGT_18	1.86047e-12	8.5488e-08	6.29176e-07	9.68791e-07	0.00403954	4.44228e-07	1.91731e-06	0.498134	157093
I12450	I12450	SPGT_19	1.21409e-16	9.17433e-09	3.89137e-10	4.65372e-06	0.0189139	3.04944e-08	1.21422e-05	0.61578	594351
I10001	I10001	SPGT_2	5.56392e-18	1.12531e-13	1.85902e-11	3.50011e-10	2.41925e-05	3.56582e-12	1.54702e-10	0.136128	866802
I12451	I12451	SPGT_20	3.80575e-17	1.93759e-12	8.64037e-15	1.41819e-06	0.000563745	2.77051e-12	6.40624e-07	0.155422	510322
I12454	I12454	SPGT_21	1.13887e-24	5.47037e-20	9.84581e-20	1.52308e-12	1.5896e-09	1.31734e-19	2.70994e-13	0.000869815	735296
I12455	I12455	SPGT_22	7.32273e-07	3.69921e-05	0.000807574	0.000176188	0.0156407	0.000519929	0.000122984	0.522709	337335
I12456	I12456	SPGT_23	4.84451e-18	1.10283e-11	3.58592e-16	2.49779e-06	8.93406e-06	1.144e-12	2.90196e-05	0.0794731	273904
I12457	I12457	SPGT_24	1.53285e-18	5.16297e-09	2.0335e-08	2.23705e-12	0.00531258	1.75578e-06	1.61897e-08	0.355049	574632
I12458	I12458	SPGT_25	6.02847e-19	1.30072e-12	6.42391e-10	2.8695e-11	0.000188219	1.96021e-09	1.42345e-10	0.0791003	672007
I12459	I12459	SPGT_26	5.63396e-11	8.84658e-10	2.40292e-09	5.02197e-06	5.62407e-05	5.65242e-10	1.09516e-06	0.0735551	692717
I12460	I12460	SPGT_27	5.4356e-31	1.95565e-16	1.50165e-07	4.947e-23	0.00114872	1.01737e-07	5.17346e-17	0.198653	682756
I12461	I12461	SPGT_28	4.16939e-20	1.04767e-12	9.65569e-18	1.99139e-07	6.65529e-07	3.08126e-13	2.58936e-05	0.0722932	399222
I12462	I12462	SPGT_29	9.39487e-19	1.77378e-15	1.10653e-15	9.17216e-11	1.11957e-08	6.36246e-14	3.68716e-10	0.0358624	679046
I10523	I10523	SPGT_3	2.28526e-14	2.70697e-12	5.41253e-10	7.37718e-09	3.05393e-06	4.75217e-10	1.31426e-09	0.0409076	691959
I12463	I12463	SPGT_30	5.75432e-14	7.37911e-12	2.05461e-13	1.13875e-06	1.1796e-06	1.30342e-12	1.11913e-06	0.029074	287981
I12464	I12464	SPGT_31	1.7865e-16	2.30552e-11	1.53497e-14	2.17943e-05	0.00757443	5.23864e-11	1.30126e-05	0.384249	635165
I12465	I12465	SPGT_32	2.06146e-16	9.08057e-06	2.39748e-07	1.44668e-11	0.0004194	0.000100792	2.8991e-06	0.186059	200090
I12470	I12470	SPGT_33	4.84258e-35	4.71191e-15	0.000475625	1.12338e-25	0.323082	0.000389126	3.42834e-13	0.50219	746244
I12471	I12471	SPGT_34	6.25173e-15	7.96138e-11	3.32407e-11	1.19114e-08	5.35907e-06	3.35157e-10	1.44709e-08	0.317112	501631
I12472	I12472	SPGT_35	3.81155e-15	2.92349e-07	0.00172712	4.4089e-13	0.0231538	0.00069104	9.34224e-08	0.112302	136826
I12473	I12473	SPGT_36	9.32367e-09	0.00264906	0.0380215	8.94719e-08	0.195264	0.04051	0.000704135	0.159093	60145
I12475	I12475	SPGT_37	3.60946e-09	1.68911e-05	9.98592e-08	0.00135693	0.00733166	8.83176e-06	0.00216377	0.17923	250250
I12477	I12477	SPGT_38	5.33671e-17	6.53071e-14	3.90015e-13	2.91273e-07	1.48505e-05	1.20583e-13	4.96214e-08	0.0873105	625449
I12968	I12968	SPGT_39	8.433e-21	3.01076e-16	1.01272e-17	4.07884e-06	0.000352167	6.30686e-17	7.2978e-07	0.195217	715206
I10974	I10974	SPGT_4	4.57721e-11	1.68549e-09	3.90674e-08	7.03024e-05	0.0024437	9.06619e-09	1.53757e-05	0.584589	568563
I12979	I12979	SPGT_40	4.20165e-22	1.55448e-18	4.53398e-17	1.75673e-12	9.56743e-08	3.54367e-17	2.30157e-13	0.0215301	782741
I12980	I12980	SPGT_41	0.0204575	0.255737	0.571075	0.115752	0.912486	0.800757	0.172175	0.818972	24259
I12981	I12981	SPGT_42	9.53116e-45	1.582e-23	6.26505e-15	4.61225e-32	1.63296e-05	1.97811e-15	1.20916e-22	0.0100636	803520
I12982	I12982	SPGT_43	1.12962e-21	4.65123e-14	5.41266e-15	2.35184e-07	0.0134141	1.46711e-13	1.37839e-07	0.559063	768526
I12983	I12983	SPGT_44	1.28289e-24	2.27109e-20	3.07368e-20	2.89757e-10	9.85803e-07	2.37161e-20	1.46961e-10	0.195955	780943
I12984	I12984	SPGT_45	3.35966e-28	2.26367e-22	5.73545e-19	3.42181e-14	7.75577e-09	3.86323e-19	8.32717e-15	0.00543105	760311
I12987	I12987	SPGT_46	2.14577e-16	2.93597e-11	1.51084e-11	8.41573e-08	0.00443958	2.67243e-11	1.44944e-07	0.09539	806323
I12988	I12988	SPGT_47	2.12934e-23	4.48212e-11	4.83848e-11	3.51981e-12	0.00822164	2.28442e-08	1.04641e-08	0.539419	778923
I13219	I13219	SPGT_48	8.84416e-25	2.34241e-20	1.72337e-18	1.13269e-12	9.64688e-08	9.93301e-19	1.49301e-13	0.113975	669748
I13220	I13220	SPGT_49	4.80779e-21	1.39535e-13	3.74635e-12	6.55363e-10	0.00575423	2.72125e-12	1.39849e-09	0.486738	568917
I12134	I12134	SPGT_5	7.91193e-28	9.10467e-12	5.73368e-08	5.08961e-19	0.155987	6.02391e-07	5.71249e-11	0.179873	693958
I13221	I13221	SPGT_50	6.66196e-07	0.0374277	4.05094e-05	0.0227978	0.161112	0.0171206	0.123703	0.159856	110704
I13222	I13222	SPGT_51	7.48854e-19	2.19195e-13	4.31986e-14	2.67021e-11	1.10651e-07	2.74513e-11	3.60911e-10	0.107579	330079
I13223	I13223	SPGT_52	1.3069e-15	1.43234e-11	5.73927e-11	1.06059e-06	0.00720735	1.47782e-10	3.02772e-07	0.302967	570490
I13224	I13224	SPGT_53	1.14581e-15	1.70235e-10	1.52976e-09	9.21748e-07	0.0312831	3.37897e-09	5.58974e-07	0.564573	560151
I13226	I13226	SPGT_54	6.77568e-18	1.26232e-11	3.71198e-11	2.63489e-10	2.70613e-05	8.22233e-11	4.6493e-10	0.0221123	463483
I13227	I13227	SPGT_55	1.44092e-18	8.26583e-13	2.85751e-11	1.1152e-08	0.00135533	8.12354e-12	1.49063e-08	0.604441	619767
I13228	I13228	SPGT_56	1.55542e-22	2.03702e-15	1.53457e-11	6.04705e-12	7.83261e-05	2.22254e-12	1.35602e-11	0.307167	750512
I1799	I1799	SPGT_57	9.66801e-24	6.02444e-17	1.54864e-16	1.17646e-10	1.2932e-06	2.71526e-16	2.17928e-11	0.0838752	817478
I1985	I1985	SPGT_58	1.43944e-18	3.84563e-15	1.00842e-13	4.00869e-08	1.41829e-05	1.14663e-14	2.87712e-08	0.375495	897462
I1994	I1994	SPGT_59	1.26051e-08	4.57884e-05	2.34074e-05	0.000149772	0.0307003	3.64416e-05	0.000351892	0.211169	370900
I12137	I12137	SPGT_6	1.56317e-28	5.71763e-19	7.06946e-18	2.57475e-14	1.19968e-05	1.0274e-17	4.42449e-14	0.100216	668321
I5396	I5396	SPGT_60	6.56529e-16	2.31832e-11	2.06685e-12	1.31842e-05	0.00270973	1.20923e-11	7.44161e-06	0.366125	665846
I5397	I5397	SPGT_61	6.09417e-17	1.54995e-12	1.26402e-13	2.22038e-06	0.00135168	6.75273e-13	6.47169e-07	0.0557203	839349
I5398	I5398	SPGT_62	6.40684e-20	6.16279e-16	4.03643e-17	1.17654e-08	8.05894e-06	1.58653e-16	3.18516e-09	0.0441473	850658
I5399	I5399	SPGT_63	3.89468e-46	2.45748e-24	2.42827e-07	6.85419e-38	0.000208304	4.60563e-08	9.86648e-24	0.231139	313441
I5400	I5400	SPGT_64	9.08796e-20	4.41245e-15	4.73965e-12	7.78524e-10	0.0051521	2.06444e-12	6.42913e-10	0.478425	800820
I6194	I6194	SPGT_65	1.69967e-16	1.00496e-13	3.41475e-13	2.35947e-08	1.63182e-06	1.4527e-13	6.00177e-09	0.0338507	776502
I6195	I6195	SPGT_66	0.00557845	0.0108587	0.0278354	0.00849524	0.0203582	0.00974453	0.00389191	0.079365	66220
I6197	I6197	SPGT_67	4.53017e-25	1.53765e-21	3.4085e-21	1.25313e-11	1.57258e-08	1.8612e-20	3.90521e-12	0.028863	836021
I6198	I6198	SPGT_68	1.44189e-09	4.92531e-07	4.6166e-06	0.000458185	0.0172954	4.65742e-06	0.000147237	0.775406	515354
I6292	I6292	SPGT_69	3.62801e-23	2.88511e-15	3.18607e-18	1.00385e-05	0.0220365	5.43197e-16	6.24159e-06	0.331061	833971
I12141	I12141	SPGT_7	8.20676e-13	4.33393e-11	4.10947e-12	8.29904e-07	4.29061e-05	5.84309e-10	8.73354e-05	0.400102	190382
I6545	I6545	SPGT_70	2.64349e-13	6.82199e-11	8.44569e-13	0.00020297	0.00174957	1.7865e-11	4.98525e-05	0.123103	506337
I6546	I6546	SPGT_71	2.10287e-18	5.91586e-17	1.07264e-18	6.15639e-07	7.59965e-07	8.42839e-18	4.22043e-05	0.911772	597160
I6548	I6548	SPGT_72	5.08955e-09	4.08493e-07	3.12549e-09	0.00814631	0.00279096	9.99018e-08	0.0937487	0.839623	188029
I6553	I6553	SPGT_73	3.31058e-18	1.02399e-10	1.02297e-10	2.45616e-10	0.00032898	7.19726e-10	4.65781e-09	0.0198321	446528
I6555	I6555	SPGT_74	1.47217e-21	4.05725e-19	4.21498e-18	1.41319e-11	1.74732e-08	1.01031e-18	2.4226e-12	0.33974	822908
I6556	I6556	SPGT_75	1.13971e-20	5.58539e-18	1.43766e-20	2.41993e-07	8.30609e-07	6.96576e-19	1.28797e-07	0.00209215	667506
I6557	I6557	SPGT_76	1.73291e-11	1.0588e-07	1.0676e-08	1.84116e-05	0.00150876	5.27268e-08	1.95768e-05	0.129539	244325
I6897	I6897	SPGT_77	3.98106e-20	6.85762e-17	2.43179e-19	6.85192e-05	0.000134489	1.14523e-17	8.08328e-05	0.0798383	718364
I6899	I6899	SPGT_78	3.68112e-25	8.0817e-13	4.48221e-13	9.99284e-11	0.0702483	1.90031e-11	2.93335e-08	0.236159	838191
I6900	I6900	SPGT_79	1.27998e-18	1.18379e-12	6.44247e-14	6.19138e-08	4.32574e-05	1.6648e-12	4.92357e-08	0.245364	764737
I12142	I12142	SPGT_8	1.49399e-23	2.38284e-12	2.95132e-13	9.84451e-12	0.000482406	1.05283e-11	4.06806e-10	0.00539167	473073
I6901	I6901	SPGT_80	2.79497e-26	1.67791e-21	7.61745e-19	1.02448e-12	6.48957e-06	2.39198e-19	1.13631e-13	0.281525	716629
I8190	I8190	SPGT_81	3.58367e-18	6.27393e-14	1.30722e-15	1.36854e-06	2.29877e-05	9.48762e-15	1.15154e-06	0.341841	580106
I8193	I8193	SPGT_82	6.58732e-18	5.85545e-12	1.50663e-15	5.11255e-05	7.78772e-05	5.80598e-13	0.000162962	0.225798	560056
I8194	I8194	SPGT_83	9.82541e-24	7.80999e-15	5.71493e-17	3.2844e-09	0.00163131	2.30042e-15	1.95754e-08	0.463426	831565
I8998	I8998	SPGT_84	3.11606e-20	2.44464e-16	2.38738e-15	7.41142e-10	4.12957e-05	1.00152e-14	1.27825e-10	0.112302	880790
I8999	I8999	SPGT_85	1.91994e-15	5.61692e-12	7.83974e-12	6.13048e-07	0.000313581	3.32369e-11	2.22231e-07	0.119325	803813
I12143	I12143	SPGT_9	3.7411e-18	3.86056e-10	3.60053e-11	2.21209e-09	0.000890017	8.90506e-09	4.07752e-08	0.627386	469049
I2337	I2337	Tepe_Hissar_C_1	4.25686e-15	0.111195	0.00245459	3.23995e-13	0.004641	0.656542	0.152494	0.546285	521911
I2925	I2925	Tepe_Hissar_C_10	6.2326e-17	0.000383084	4.02567e-08	1.72443e-16	2.19154e-08	0.000223343	0.00236616	0.00142065	664720
I2927	I2927	Tepe_Hissar_C_11	3.60714e-12	0.037449	0.00456867	1.43584e-11	0.0134114	0.454759	0.043881	0.554041	404589
I2928	I2928	Tepe_Hissar_C_12	2.62508e-10	0.100735	0.388252	2.52049e-08	0.275352	0.753314	0.0920912	0.424797	205957
I2512	I2512	Tepe_Hissar_C_2	9.67947e-11	0.0336314	0.0274408	4.54977e-08	0.0418121	0.141368	0.0946571	0.128579	243409
I2513	I2513	Tepe_Hissar_C_3	1.05209e-14	2.67761e-05	6.59986e-06	1.08671e-13	2.68545e-06	0.000131609	0.558946	0.360366	634820
I2514	I2514	Tepe_Hissar_C_4	1.04755e-16	0.0124929	3.82966e-05	1.54051e-16	8.19212e-06	0.0290882	0.844452	0.690766	745066
I2918	I2918	Tepe_Hissar_C_5	4.3818e-05	0.00226285	0.0416301	9.39076e-06	0.0313441	0.0323722	0.0633171	0.041549	45366
I2921	I2921	Tepe_Hissar_C_6	1.17841e-08	0.213526	0.00203979	8.27411e-09	0.000704625	0.160504	0.483775	0.621731	180658
I2922	I2922	Tepe_Hissar_C_7	1.46499e-16	0.00523859	3.36327e-07	3.18646e-15	3.39176e-07	0.00639203	0.0201499	0.0234472	279888
I2923	I2923	Tepe_Hissar_C_8	1.37133e-28	1.8382e-06	3.91215e-08	3.35965e-26	1.20993e-08	0.000650112	0.000144511	0.00316202	576483
I2924	I2924	Tepe_Hissar_C_9	1.52256e-18	0.0004866	0.0021443	1.45737e-16	0.000916305	0.0503142	0.0386172	0.0636455	601080
