# Supplementary material for: On the limits of fitting complex models of population history to f-statistics
Source: eLife. 2023 Jun 29;12:e85492. doi: 10.7554/eLife.85492 (PMC10310323; doi:10.7554/eLife.85492)
Supplement: Supplementary file 7. [file elife-85492-supp7.xlsx]

## Sheet: Supplementary file 7
original population annotation	modified population annotation	individual ID	fraction of missing data
Botai	N/A	Besta7_AMIS-1-00063_Kaz_m3132	0.001969
Botai	Botai	Botai1_CGG-1-018173_Kaz_m3221	0.01179
Botai	Botai	Botai2018x10_AMIS-1-01648_Kaz_m3333	0.1368
Botai	Botai	Botai2018x11_AMIS-1-01649_Kaz_m3333	0.07168
Botai	Botai	Botai2018x12_AMIS-1-01650_Kaz_m3333	0.2114
Botai	Botai	Botai2018x13_AMIS-1-01651_Kaz_m3333	0.1486
Botai	Botai	Botai2018x14_AMIS-1-01652_Kaz_m3333	0.01045
Botai	Botai	Botai2018x15_AMIS-1-01653_Kaz_m3333	0.177
Botai	Botai	Botai2018x16_AMIS-1-01654_Kaz_m3333	0.2466
Botai	Botai	Botai2018x17_AMIS-1-01655_Kaz_m3333	0.06699
Botai	Botai	Botai2018x26_AMIS-1-01642_Kaz_m3333	0.01048
Botai	Botai	Botai2018x28_AMIS-1-01656_Kaz_m3333	0.3557
Botai	Botai	Botai2018x29_AMIS-1-01657_Kaz_m3333	0.5062
Botai	Botai	Botai2018x3_AMIS-1-01643_Kaz_m3333	0.1995
Botai	Botai	Botai2018x31_AMIS-1-01659_Kaz_m3333	0.01263
Botai	Botai	Botai2018x33_AMIS-1-01660_Kaz_m3333	0.1392
Botai	Botai	Botai2018x4_AMIS-1-01644_Kaz_m3333	0.01375
Botai	Botai	Botai2018x6_AMIS-1-01646_Kaz_m3333	0.1014
Botai	Botai	Botai4_CGG-1-018176_Kaz_m3182	0.07443
Botai	Botai	BotaixC_CGG-1-020183_Kaz_m3333	0.02404
Botai	Botai	BotaixG_CGG-1-020187_Kaz_m3193	0.01032
Botai	Botai	BotaixI_CGG-1-020189_Kaz_m3333	0.02834
Botai	Botai	BotaixK_CGG-1-020191_Kaz_m3501	0.006913
Botai	N/A	KY001_CGG-1-022896_Kaz_m3244	0.1163
Botai	N/A	Nov3x10_CGG-1-022047_Rus_m3443	0.06568
Botai	N/A	Nov3x7_CGG-1-022044_Rus_m3451	0.3285
Botai	N/A	Nov6x11_AMIS-1-02634_Rus_m3217	0.4124
Botai	N/A	Nov6x6_AMIS-1-02629_Rus_m3224	0.1795
Botai	N/A	Nov6x7_AMIS-1-02630_Rus_m3217	0.1918
Botai	N/A	Ural2017x67_AMIS-1-00456_Rus_m2774	0.185
Botai	N/A	Ural2017x69_AMIS-1-00458_Rus_m2774	0.1938
Botai	N/A	Ural2017x70_AMIS-1-00459_Rus_m2753	0.3033
Botai	N/A	Ural2017x71_AMIS_1_00460_m2790	0.2181
Botai	N/A	Ural2017x80_AMIS-1-01407_Kaz_m3235	0.1431
C_PONT	N/A	BZNK1002x4_AMIS-1-01764_Rus_m3450	0.2958
C_PONT	C_PONT	LORUS2018x09_AMIS-1-01277_Rus_m3131	0.06273
C_PONT	C_PONT	LORUS2018x12_AMIS-1-01280_Rus_m2995	0.6781
C_PONT	N/A	Ural2017x26_AMIS-1-00415_Rus_m2751	0.4533
CWC	CWC	Hohler1x1_AMIS_1_02431_Ger_m2679	0.6531
CWC	CWC	Hohler1x2_AMIS_1_02432_Ger_CWC	0.5488
CWC	CWC	Hohler2_AMIS_1_02433_Ger_m2719	0.5009
CWC	CWC	Hohler3x1_AMIS_1_02434_Ger_m2676	0.4276
CWC	CWC	Hohler3x2_AMIS_1_02435_Ger_CWC	0.7259
CWC	CWC	Hohler3x3_AMIS_1_02436_Ger_CWC	0.2594
DOM2	N/A	18ELTu18_AMIS-1-01102_Spa_m588	0.4061
DOM2	N/A	AC7970_AMIS-1-00131_Tur_m290	0.5243
DOM2	N/A	AC8811_AMIS-1-00133_Tur_m2125	0.06824
DOM2	N/A	AC9016_AMIS-1-00134_Tur_m1900	0.393
DOM2	N/A	Arz15_CGG-1-017084_Rus_m650	0.006823
DOM2	N/A	Arz1x12_AMIS-1-01222_Rus_m854	0.02746
DOM2	N/A	Arz1x13_AMIS-1-01223_Rus_m581	0.001826
DOM2	N/A	Arz1x14_AMIS-1-01224_Rus_m800	0.09952
DOM2	N/A	Besta5_AMIS-1-00061_Kaz_m1892	0.3488
DOM2	N/A	Besta6_AMIS-1-00062_Kaz_m661	0.2348
DOM2	N/A	Bi5x1_AMIS-1-02594_Rus_m625	0.29
DOM2	N/A	BZNK169x1_AMIS-1-01759_Rus_m871	0.4354
DOM2	N/A	CD1819_AMIS-1-00115_Tur_m1299	0.135
DOM2	N/A	CD5203_AMIS-1-00107_Tur_m985	0.173
DOM2	N/A	Chalk1_AMIS-1-01388_UK_m865	0.8266
DOM2	N/A	Chalk3_AMIS-1-01390_UK_m474	0.7262
DOM2	N/A	Chin1x1_AMIS-1-01232_Rus_m810	0.3628
DOM2	N/A	Cho1x3_AMIS-1-02597_Rus_m625	0.0958
DOM2	N/A	DaAn01_CGG-1-018337_Rus_m1883	0.6186
DOM2	N/A	EREsto2_CGG-1-021521_Est_m661	0.06252
DOM2	N/A	EREsto3_CGG-1-021522_Est_m659	0.03079
DOM2	N/A	EREsto8_CGG-1-021527_Est_m654	0.381
DOM2	N/A	Fen4_CGG-1-018396_Chi_m800	0.01752
DOM2	N/A	Fetusx9m_CGG-1-022147_Spa_m475	0.006389
DOM2	N/A	Ganx10_AMIS-1-01210_Mon_m775	0.2367
DOM2	N/A	Ganx4_AMIS-1-01204_Mon_m775	0.5652
DOM2	N/A	Gar3_CGG-1-018389_Rom_m1539	0.03382
DOM2	N/A	GVA9010_CGG-1-021589_Mon_m1057	0.9337
DOM2	N/A	GVA9035_CGG-1-021614_Mon_m1024	0.008147
DOM2	N/A	GVA9036_CGG-1-021615_Mon_m1013	0.07494
DOM2	N/A	GVA9037_CGG-1-021616_Mon_m1013	0.06568
DOM2	N/A	GVA9042_CGG-1-021621_Mon_m1068	0.04813
DOM2	N/A	Halvai2_AMIS-1-00058_Kaz_m1856	0.1796
DOM2	N/A	Halvai3_AMIS-1-00059_Kaz_m1856	0.127
DOM2	N/A	Hantx9_AMIS-1-01200_Mon_m775	0.2298
DOM2	DOM2	Hasanlu1140_CGG-1-019998_Ira_m663	0.1809
DOM2	DOM2	Hasanlu2327_CGG-1-019995_Ira_m768	0.4891
DOM2	DOM2	Hasanlu2405_CGG-1-019992_Ira_m868	0.07908
DOM2	DOM2	Hasanlu3394_CGG-1-019997_Ira_m790	0.07462
DOM2	DOM2	Hasanlu3398_CGG-1-019986_Ira_m768	0.3343
DOM2	DOM2	Hasanlu3461_CGG-1-020003_Ira_m913	0.01096
DOM2	DOM2	Hasanlu368_CGG-1-019994_Ira_m878	0.1798
DOM2	DOM2	HasanluV31E_CGG-1-021461_Ira_m768	0.142
DOM2	N/A	Kent1_AMIS-1-00144_Kaz_m1466	0.15
DOM2	N/A	Kent2_AMIS-1-00145_Kaz_m1474	0.217
DOM2	N/A	Kent5_AMIS-1-00148_Kaz_m1494	0.2268
DOM2	N/A	Kent6_AMIS-1-0149_Kaz_m1463	0.2805
DOM2	N/A	Kent7_AMIS-1-00150_Kaz_m1476	0.3889
DOM2	N/A	KSH4_CGG-1-017098_Kaz_m1955	0.2791
DOM2	N/A	KSH5_CGG-1-017099_Kaz_m1895	0.007165
DOM2	N/A	Kuymx2_AMIS-1-01231_Rus_m580	0.003439
DOM2	N/A	KZ2019x1a_AMIS-1-02014_Kaz_m293	0.09168
DOM2	N/A	LORUS2018x23_AMIS-1-01291_Rus_m1796	0.05601
DOM2	N/A	LORUS2018x25_AMIS-1-01293_Rus_m1785	0.1989
DOM2	N/A	LORUS2018x4_AMIS-1-01272_Rus_m1844	0.6818
DOM2	N/A	LORUS2018x43_AMIS-1-01311_Rus_m1798	0.2375
DOM2	N/A	LORUS2018x44_AMIS-1-01312_Rus_m1109	0.3088
DOM2	N/A	LORUS2018x62_AMIS-1-01330_Rus_m1849	0.000586
DOM2	N/A	Magor_AMIS-1-01387_UK_m1009	0.1764
DOM2	N/A	Mic2_CGG-1-018388_Mol_m1250	0.8747
DOM2	N/A	Miciurin05_AMIS-1-00471_Mol_m1373	0.1787
DOM2	N/A	MOLDA1_CGG-1-022639_Mol_m2063	0.1627
DOM2	N/A	Mon2017x126x1_CGG-1-021881_Mon_m942	0.01554
DOM2	N/A	Mon2017x127_CGG-1-021883_Mon_m658	0.1944
DOM2	N/A	Mon2017x140x1_CGG-1-021901_Mon_m1116	0.0315
DOM2	N/A	Mon2017x159_CGG-1-021923_Mon_m1136	0.003731
DOM2	N/A	Mon2017x172_CGG-1-021938_Mon_m987	0.04358
DOM2	N/A	Mon2017x174_CGG-1-021941_Mon_m1145	0.6772
DOM2	N/A	Mon2017x176_CGG-1-0219435_Mon_m939	0.9338
DOM2	N/A	Mon2017x188_CGG-1-021957_Mon_m1010	0.1277
DOM2	N/A	Mon2017x199_CGG-1-021970_Mon_m865	0.4348
DOM2	N/A	Monx2_AMIS-1-01181_Mon_m1100	0.04962
DOM2	N/A	Monx4_AMIS-1-01183_Mon_m1018	0.1618
DOM2	N/A	Monx7_AMIS-1-01186_Mon_m1030	0.1185
DOM2	N/A	Monx9_AMIS-1-01188_Mon_m775	0.1559
DOM2	N/A	NB44_CGG-1-017036_Rus_m1856	0.3066
DOM2	N/A	NB45_CGG-1-017037_Rus_m1865	0.4196
DOM2	N/A	NHr2_CGG-1-018379_Slo_m1683	0.5936
DOM2	N/A	Novoil1_Ages-1-7475_Kaz_m1832	0.02862
DOM2	N/A	Novoil2_Ages-1-7476_Kaz_m1832	0.06411
DOM2	N/A	PKo7_AMIS-1-02033_Kaz_m1754	0.5932
DOM2	N/A	PLKaz1_AMIS-1-01684_Pol_m1550	0.3585
DOM2	N/A	PLKaz2_AMIS-1-01678_Pol_m1480	0.07201
DOM2	N/A	PLKaz3_AMIS-1-01679_Pol_m1550	0.07504
DOM2	N/A	PLKaz4_AMIS-1-01680_Pol_m1550	0.1562
DOM2	N/A	PLKaz5_AMIS-1-01681_Pol_m1550	0.1618
DOM2	N/A	PLKaz6_AMIS-1-01682_Pol_m1550	0.1019
DOM2	N/A	PLMie18_AMIS-1-01702_Pol_m1483	0.1967
DOM2	N/A	PLMie8_AMIS-1-01692_Pol_m649	0.3463
DOM2	N/A	PLPie2_AMIS-1-01684_Pol_m1532	0.116
DOM2	N/A	PRAGUE32_AMIS-1-00842_Cze_m787	0.2475
DOM2	N/A	PRAGUE40_AMIS-1-00850_Cze_m2037	0.3301
DOM2	N/A	PRAGUE62_AMIS-1-00872_Cze_m1249	0.2714
DOM2	N/A	PRAGUE64_AMIS-1-00874_Cze_m1110	0.3176
DOM2	N/A	PRAGUE68_AMIS-1-00878_Cze_m1310	0.3107
DOM2	N/A	PRAGUE77_AMIS-1-01716_Cze_m624	0.03689
DOM2	N/A	PRAGUE9_AMIS-1-00662_Cze_m1845	0.02498
DOM2	N/A	PRAGUEx27x81_AMIS-1-00680-01729_Cze_m1241	0.00589
DOM2	N/A	Rid1_CGG-1-018468_Est_m700	0.1126
DOM2	N/A	Rid2_CGG-1-018469_Est_m700	0.2424
DOM2	N/A	RusxNx01_AMIS-1-00563_Rus_m1862	0.005787
DOM2	N/A	RusxNx02_AMIS-1-00564_Rus_m1825	0.3167
DOM2	N/A	RusxNx03_AMIS-1-00565_Rus_m1851	0.5387
DOM2	N/A	RusxNx04_AMIS-1-00566_Rus_m1789	0.3241
DOM2	N/A	RusxNx09_AMIS-1-00572_Rus_m1851	0.1316
DOM2	N/A	SAGxS27_CGG-1-019559_Ira_m1102	0.2427
DOM2	N/A	SRxNHMx005_AMIS-1-01852_Aus_m585	0.2573
DOM2	N/A	SV2019x18_AMIS-1-02382_Tun_m581	0.3657
DOM2	N/A	SV2019x19_AMIS-1-02383_Tun_m643	0.579
DOM2	N/A	SV2019x22_AMIS-1-02386_Tun_m660	0.6509
DOM2	N/A	Tarquinia3298_AMIS-1-01381_Ita_m657	0.02541
DOM2	N/A	TP4_CGG-1-018394_Geo_m1578	0.006047
DOM2	N/A	UE10287_CGG-1-021002_Fra_m617	0.003431
DOM2	N/A	UE11080x11082_CGG-1-020973_Spa_m664	0.1122
DOM2	N/A	UE13045_CGG-1-020963_Spa_m738	0.8934
DOM2	N/A	UE172_CGG-1-020984_Spa_m317	0.1116
DOM2	N/A	UE4618_CGG-1-020962_Spa_m655	0.04797
DOM2	N/A	Ural2017x1_AMIS-1-00391_Rus_m1868	0.07214
DOM2	N/A	Ural2017x20_AMIS-1-00409_Rus_m1356	0.1341
DOM2	N/A	Ural2017x21_AMIS-1-00410_Rus_m1377	0.2118
DOM2	N/A	Ural2017x22_AMIS-1-00411_Rus_m1377	0.422
DOM2	N/A	Ural2017x25_AMIS-1-00414_Rus_m1460	0.2293
DOM2	N/A	Ural2017x29_AMIS-1-00418_Rus_m1853	0.3067
DOM2	N/A	Ural2017x3_AMIS-1-00393_Rus_m1815	0.1475
DOM2	N/A	Ural2017x30_AMIS-1-00419_Rus_m1863	0.1819
DOM2	N/A	Ural2017x31_CGG-NO-NUMBER_Rus_m1845	0.3799
DOM2	N/A	Ural2017x33_AMIS-1-00422_Rus_m1854	0.09171
DOM2	N/A	Ural2017x34_CGG-NO-NUMBER_Rus_m1861	0.5887
DOM2	N/A	Ural2017x36_AMIS-1-00425_Rus_m1892	0.1702
DOM2	N/A	Ural2017x4_AMIS-1-00394_Rus_m1820	0.2359
DOM2	N/A	Ural2017x41_AMIS-1-00430_Rus_m1917	0.07762
DOM2	N/A	Ural2017x44_AMIS-1-00433_Rus_m1954	0.203
DOM2	N/A	Ural2017x47_AMIS-1-00436_Rus_m1856	0.09171
DOM2	N/A	Ural2017x5_AMIS-1-00395_m1951	0.1508
DOM2	N/A	Ushx9_AMIS-1-00204_Rus_m775	0.3135
donkey	N/A	Easi_0233A_Willy	0.9855
donkey	donkey	Esom_0226A_Esomalicus	0.02177
ELEN	N/A	ARUS0224B_CGG_x_10022_Rus_m40610	0.0236
ELEN	N/A	ARUS0225B_CGG_x_10023_Rus_m14170	0.05416
ELEN	N/A	Batagai_CGG_NO_NUMBER_Rus_m3136	0.008609
ELEN	N/A	ERRus30x31_CGG-1-021550x1_Rus_m3435	0.2081
ELEN	ELEN	Rus2017x2_AMIS-1-00773_Rus_m51700i	0.2029
ELEN	ELEN	Rus2017x3_CGG-NO-NUMBER_Rus_m51700i	0.2509
ELEN	ELEN	Rus2017x5_AMIS-1-00776_Rus_m51700i	0.1685
ELEN	ELEN	Rus2017x6_AMIS-1-00777_Rus_m28567	0.1388
LP_SFR	LP_SFR	Gral1_AMIS-1-01736_Fra_m16101	0.2688
LP_SFR	LP_SFR	Gral10_AMIS-1-01745_Fra_m18924	0.2937
LP_SFR	LP_SFR	Gral13_AMIS-1-01748_Fra_m16500	0.05059
LP_SFR	LP_SFR	Gral14_AMIS-1-01749_Fra_m21655	0.1267
LP_SFR	LP_SFR	Gral2_AMIS-1-01737_Fra_m18924	0.1695
LP_SFR	LP_SFR	Gral3_AMIS-1-01738_Fra_m18924	0.3598
LP_SFR	LP_SFR	Gral4_AMIS-1-01739_Fra_m18924	0.2093
LP_SFR	LP_SFR	Gral5_AMIS-1-01740_Fra_m18924	0.3465
LP_SFR	LP_SFR	Gral6_AMIS-1-01741_Fra_m18924	0.1186
LP_SFR	LP_SFR	Gral7_AMIS-1-01742_Fra_m19670	0.08941
LP_SFR	LP_SFR	Gral8_AMIS-1-01743_Fra_m18924	0.3264
LP_SFR	LP_SFR	Gral9_AMIS-1-01744_Fra_m18924	0.1141
NEO_ANA	N/A	CD2017_AMIS-1-00096_Tur_m4532	0.8781
NEO_ANA	NEO_ANA	KSK16232_AMIS-1-00027_Tur_m6319	0.03383
Tarpan	Tarpan	Tarpan_AMIS_1_02430_Ukr_1868	0.1653
TURG	TURG	LORUS2018x15_AMIS-1-01283_Rus_m2763	0.02394
TURG	TURG	LORUS2018x16_AMIS-1-01284_Rus_m2786	0.1837
TURG	TURG	RusxNx53_AMIS-1-00616_Rus_m2785	0.0007265
TURG	TURG	RusxNx58_AMIS-1-00621_Rus_m2758	0.1241
